# Supplementary material for: CiliateGEM: an open-project and a tool for predictions of ciliate metabolic variations and experimental condition design
Source: BMC Bioinformatics. 2018 Nov 30;19(Suppl 15):442. doi: 10.1186/s12859-018-2422-9 (PMC6266953; doi:10.1186/s12859-018-2422-9)
Supplement: Supplementary file 4 — List of reactions. (XLSX 98 kb) [file 12859_2018_2422_MOESM4_ESM.xlsx]

## Sheet: Pseudomonas_base
abbreviation	official name	equation	subsystem	EC number	protein gene association	gene association	protein association	obj_coef	lowbnd	uppbnd
NADPHQR2	NADPH Quinone Reductase (Ubiquinone-8)	[c] : h + nadph + q8 --> nadp + q8h2	others	1.6.99.6	( Qor-kt2 (PP_3606) ) or ( Qor-kt1 (PP_0072) )	( PP_3606 or PP_0072 )	( Qor-kt2 ) or ( Qor-kt1 )	0	0	1000
ALAR	alanine racemase	[c] : ala-L <==> ala-D	Alanine and Aspartate Metabolism	5.1.1.1	DadX (PP_5269)	PP_5269	DadX	0	-1000	1000
ALATA_L	L-alanine transaminase	[c] : akg + ala-L <==> glu-L + pyr	Alanine and Aspartate Metabolism	2.6.1.2				0	-1000	1000
ALATRS	Alanyl-tRNA synthetase	[c] : ala-L + atp + trnaala --> alatrna + amp + ppi	Alanine and Aspartate Metabolism	6.1.1.7	AlaS (PP_4474)	PP_4474	AlaS	0	0	1000
ASNN	L-asparaginase	[c] : asn-L + h2o --> asp-L + nh4	Alanine and Aspartate Metabolism	3.5.1.1	Ans-kt (PP_0495)	PP_0495	Ans-kt	0	0	1000
ASPO1	L-aspartate oxidase	[c] : asp-L + h2o + o2 --> h2o2 + nh4 + oaa	Alanine and Aspartate Metabolism	1.4.3.16	NadB (PP_1426)	PP_1426	NadB	0	0	1000
ASPT	L-aspartase	[c] : asp-L --> fum + nh4	Alanine and Aspartate Metabolism	4.3.1.1	AspA (PP_5338)	PP_5338	AspA	0	0	1000
ASPTRS	Aspartyl-tRNA synthetase	[c] : asp-L + atp + trnaasp --> amp + asptrna + ppi	Alanine and Aspartate Metabolism	6.1.1.12	AspS (PP_1213)	PP_1213	AspS	0	0	1000
ASNS1	asparagine synthase (glutamine-hydrolysing)	[c] : asp-L + atp + gln-L + h2o --> amp + asn-L + glu-L + h + ppi	Alanine and Aspartate Metabolism	6.3.5.4	AsnBkt (PP_1750)	PP_1750	AsnBkt	0	0	1000
G1PACT	glucosamine-1-phosphate N-acetyltransferase	[c] : accoa + gam1p --> acgam1p + coa + h	Aminosugar Metabolism	2.3.1.157	GlmU (PP_5411)	PP_5411	GlmU	0	0	1000
PGAMT	phosphoglucosamine mutase	[c] : gam1p <==> gam6p	Aminosugar Metabolism	5.4.2.10	GlmM1 (PP_4716)	PP_4716	GlmM1	0	-1000	1000
UAGCVT	UDP-N-acetylglucosamine 1-carboxyvinyltransferase	[c] : pep + uacgam --> pi + uaccg	Aminosugar Metabolism	2.5.1.7	MurA (PP_0964)	PP_0964	MurA	0	0	1000
UAGDP	UDP-N-acetylglucosamine diphosphorylase	[c] : acgam1p + h + utp --> ppi + uacgam	Aminosugar Metabolism	2.7.7.23	GlmU (PP_5411)	PP_5411	GlmU	0	0	1000
UAPGR	UDP-N-acetylenolpyruvoylglucosamine reductase	[c] : h + nadph + uaccg --> nadp + uamr	Aminosugar Metabolism	1.1.1.158	MurB (PP_1904)	PP_1904	MurB	0	0	1000
ARGD	Arginine Deiminase	[c] : arg-L + h2o --> citr-L + nh4	Arginine and Proline Metabolism	3.5.3.6	ArcA (PP_1001)	PP_1001	ArcA	0	0	1000
ARGDC	arginine decarboxylase	[c] : arg-L + h --> agm + co2	Arginine and Proline Metabolism	4.1.1.19	SpeA (PP_0567)	PP_0567	SpeA	0	0	1000
ARGSL	argininosuccinate lyase	[c] : argsuc <==> arg-L + fum	Arginine and Proline Metabolism	4.3.2.1	ArgH (PP_0184)	PP_0184	ArgH	0	-1000	1000
ARGSS	argininosuccinate synthase	[c] : asp-L + atp + citr-L --> amp + argsuc + h + ppi	Arginine and Proline Metabolism	6.3.4.5	ArgG (PP_1088)	PP_1088	ArgG	0	0	1000
ARGTRS	Arginyl-tRNA synthetase	[c] : arg-L + atp + trnaarg --> amp + argtrna + ppi	Arginine and Proline Metabolism	6.1.1.19	ArgS (PP_5089)	PP_5089	ArgS	0	0	1000
ARUH	L-Arginine pyruvate transaminase	[c] : arg-L + pyr <==> ala-L + oxoarg-L	Arginine and Proline Metabolism		AspC (PP_3721)	PP_3721	AspC	0	-1000	1000
AST	Arginine succinyltransferase	[c] : arg-L + succoa --> coa + h + sucarg	Arginine and Proline Metabolism	2.3.1.109	AruFG ( PP_4479 and PP_4480 )	( PP_4479 and PP_4480 )	AruFG	0	0	1000
G5SADr	L-glutamate 5-semialdehyde dehydratase, reversible	[c] : glu5sa <==> 1pyr5c + h + h2o	Arginine and Proline Metabolism					0	-1000	1000
G5SD	glutamate-5-semialdehyde dehydrogenase	[c] : glu5p + h + nadph --> glu5sa + nadp + pi	Arginine and Proline Metabolism	1.2.1.41	ProA (PP_4811)	PP_4811	ProA	0	0	1000
GDBTALDH	4-Guanidinobutanoate	[c] : gdbtal + h2o + nad --> 4gudbutn + (2) h + nadh	Arginine and Proline Metabolism		KauB (PP_5278)	PP_5278	KauB	0	0	1000
GLYBabcpp	Glycine betaine transport via ABC system (periplasm)	atp[c] + glyb[p] + h2o[c] --> adp[c] + glyb[c] + h[c] + pi[c]	Arginine and Proline Metabolism		( ProU-kt1 ( PP_0294 and PP_0295 and PP_0296 ) ) or ( OpuBA (PP_0868) and OpuBB ( PP_0869 ) or ( PP_0871 ) and OpuBC (PP_0870) )	( ( PP_0294 and PP_0295 and PP_0296 ) or ( PP_0868 and ( PP_0869 or PP_0871 ) and PP_0870 ) )	( ProU-kt1 ) or ( OpuBA and OpuBB and OpuBC )	0	0	1000
GUDBUTNAH	4-guanidinobutanoate amidinohydrolase	[c] : 4gudbutn + h2o --> 4abut + urea	Arginine and Proline Metabolism	3.5.3.7	GbuA (PP_4523)	PP_4523	GbuA	0	0	1000
OARGDC	Oxoarginine decarboxylase	[c] : h + oxoarg-L --> co2 + gdbtal	Arginine and Proline Metabolism		AruI (PP_1394)	PP_1394	AruI	0	0	1000
ORNCD	ornithine cyclodeaminase	[c] : orn --> nh4 + pro-L	Arginine and Proline Metabolism	4.3.1.12	( Ocdch1 (PP_3190) ) or ( Ocd (PP_3533) ) or ( Ocdch2 (PP_4431) )	( PP_3190 or PP_3533 or PP_4431 )	( Ocdch1 ) or ( Ocd ) or ( Ocdch2 )	0	0	1000
P5CD	1-pyrroline-5-carboxylate dehydrogenase	[c] : 1pyr5c + (2) h2o + nad --> glu-L + h + nadh	Arginine and Proline Metabolism	1.5.1.12	PutA (PP_4947)	PP_4947	PutA	0	0	1000
P5CR	pyrroline-5-carboxylate reductase	[c] : 1pyr5c + (2) h + nadph --> nadp + pro-L	Arginine and Proline Metabolism	1.5.1.2	ProC-2 (PP_5095)	PP_5095	ProC-2	0	0	1000
PROD2	Proline dehydrogenase	[c] : fad + pro-L --> 1pyr5c + fadh2 + h	Arginine and Proline Metabolism	1.5.99.8	PutA (PP_4947)	PP_4947	PutA	0	0	1000
PROTRS	Prolyl-tRNA synthetase	[c] : atp + pro-L + trnapro --> amp + ppi + protrna	Arginine and Proline Metabolism	6.1.1.15	ProS (PP_1205)	PP_1205	ProS	0	0	1000
PROabcpp	L-proline transport via ABC system (periplasm)	atp[c] + h2o[c] + pro-L[p] --> adp[c] + h[c] + pi[c] + pro-L[c]	Arginine and Proline Metabolism		( ProU-kt1 ( PP_0294 and PP_0295 and PP_0296 ) ) or ( ProU-kt2 ( PP_2774 and PP_2775 ) ) or ( AapJ (PP_1297) and AapM (PP_1299) and AapP (PP_1300) and AapQ (PP_1298) ) or ( OpuBA (PP_0868) and OpuBB ( PP_0869 ) or ( PP_0871 ) and OpuBC (PP_0870) )	( ( PP_0294 and PP_0295 and PP_0296 ) or ( PP_2774 and PP_2775 ) or ( PP_1297 and PP_1299 and PP_1300 and PP_1298 ) or ( PP_0868 and ( PP_0869 or PP_0871 ) and PP_0870 ) )	( ProU-kt1 ) or ( ProU-kt2 ) or ( AapJ and AapM and AapP and AapQ ) or ( OpuBA and OpuBB and OpuBC )	0	0	1000
PROt2pp	L-proline transport in via proton symport (periplam)	h[p] + pro-L[p] --> h[c] + pro-L[c]	Arginine and Proline Metabolism		( ProP-kt1 (PP_2914) ) or ( ProY-kt (PP_5031) )	( PP_2914 or PP_5031 )	( ProP-kt1 ) or ( ProY-kt )	0	0	1000
PROt4pp	Na+/Proline-L symporter (periplasm)	na1[p] + pro-L[p] --> na1[c] + pro-L[c]	Arginine and Proline Metabolism		PutPec (PP_4946)	PP_4946	PutPec	0	0	1000
SADH	Succinylarginine dihydrolase	[c] : (2) h + (2) h2o + sucarg --> co2 + (2) nh4 + sucorn	Arginine and Proline Metabolism	2.6.1.69	AstB (PP_4477)	PP_4477	AstB	0	0	1000
SGDS	Succinylglutamate desuccinylase	[c] : h2o + sucglu --> glu-L + succ	Arginine and Proline Metabolism		AruE (PP_4475)	PP_4475	AruE	0	0	1000
SGSAD	Succinylglutamic semialdehyde dehydrogenase	[c] : h2o + nad + sucgsa --> (2) h + nadh + sucglu	Arginine and Proline Metabolism		AruD (PP_4478)	PP_4478	AruD	0	0	1000
SOTA	Succinylornithine transaminase	[c] : akg + sucorn --> glu-L + sucgsa	Arginine and Proline Metabolism		AruC (PP_4481)	PP_4481	AruC	0	0	1000
SPMS	spermidine synthase	[c] : ametam + ptrc --> 5mta + h + spmd	Arginine and Proline Metabolism	2.5.1.16				0	0	1000
3,4DHBZ1t(pp)	3,4-dihidroxy benzoate reversible trasporter via proton symport.	34dhbz[p] + h[p] <==> 34dhbz[c] + h[c]	B-Ketoadipate pathway		PcaK (PP_1376)	PP_1376	PcaK	0	-1000	1000
3,4DHBZt2	Protocatechuate outher membrane transport	34dhbz[e] <==> 34dhbz[p]	B-Ketoadipate pathway		PcaP (PP_1382)	PP_1382	PcaP	0	-1000	1000
3OADPCOAT	3-oxoadipate CoA-transferase	[c] : 3oxoadp + succoa --> oxadpcoa + succ	B-Ketoadipate pathway	2.8.3.6	PcaIJ ( PP_3951 and PP_3952 )	( PP_3951 and PP_3952 )	PcaIJ	0	0	1000
3OXCOAT	3-oxoadipyl-CoA thiolase	[c] : coa + oxadpcoa --> accoa + succoa	B-Ketoadipate pathway		( PcaF (PP_1377) ) or ( PaaE (PP_3280) )	( PP_1377 or PP_3280 )	( PcaF ) or ( PaaE )	0	0	1000
3OXOADPt(pp)	3-oxoadipate MFS transporter	3oxoadp[p] + h[p] <==> 3oxoadp[c] + h[c]	B-Ketoadipate pathway		PcaT (PP_1378)	PP_1378	PcaT	0	-1000	1000
4CMCOAS	feruloyl coenzyme A synthetase (AMP-forming)	[c] : T4hcinnm + atp + coa --> 4cmcoa + amp + ppi	B-Ketoadipate pathway	6.2.1.12	Fcs (PP_3356)	PP_3356	Fcs	0	0	1000
4CMLCL-kt	4-carboxymuconolactone decarboxylase	[c] : 4cml + h --> 5odhf2a + co2	B-Ketoadipate pathway	4.1.1.44	PcaC (PP_1381)	PP_1381	PcaC	0	0	1000
4HBHYOX	4-hydroxybenzoate,NADPH:oxygen oxidoreductase (3-hydroxylating)	[c] : 4hbz + h + nadph + o2 --> 34dhbz + h2o + nadp	B-Ketoadipate pathway	1.14.13.2	PobA (PP_3537)	PP_3537	PobA	0	0	1000
BZ12DOX	benzoate 1,2-dioxygenase	[c] : bz + h + nadh + o2 --> bz12diol + nad	B-Ketoadipate pathway	1.14.12.10	( BenABC ( PP_3161 and PP_3162 and PP_3163 ) ) or ( XylX (pWW0_102) and XylY (pWW0_101) and XylZ (pWW0_100) )	( ( PP_3161 and PP_3162 and PP_3163 ) or ( pWW0_102 and pWW0_101 and pWW0_100 ) )	( BenABC ) or ( XylX and XylY and XylZ )	0	0	1000
BZDIOLDH	1,2-dihydrodihydroxybenzoate dehydrogenase	[c] : bz12diol + nad --> catechol + co2 + nadh	B-Ketoadipate pathway	1.3.1.25	( BenD (PP_3164) ) or ( XylL (pWW0_099) )	( PP_3164 or pWW0_099 )	( BenD ) or ( XylL )	0	0	1000
BZt1	Benzoate proton symport periplasm	bz[p] + h[p] <==> bz[c] + h[c]	B-Ketoadipate pathway		( BenK (PP_3165) ) or ( DctA (PP_1188) )	( PP_3165 or PP_1188 )	( BenK ) or ( DctA )	0	-1000	1000
BZt3	Benzoate transport. Outher membrane porin.	bz[e] <==> bz[p]	B-Ketoadipate pathway		BenF (PP_3168)	PP_3168	BenF	0	-1000	1000
CACOAHA	Enoyl-CoA hydratase/aldolase	[c] : caffcoa + h2o --> 34dhbald + accoa	B-Ketoadipate pathway		Ech (PP_3358)	PP_3358	Ech	0	0	1000
CAFFCOA	feruloyl coenzyme A synthetase (AMP forming)	[c] : 34dhcinm + atp + coa --> amp + caffcoa + ppi	B-Ketoadipate pathway	6.2.1.12	Fcs (PP_3356)	PP_3356	Fcs	0	0	1000
CATDOX	catechol 1,2-dioxygenase;	[c] : catechol + o2 --> ccmuac + (2) h	B-Ketoadipate pathway	1.13.11.1	( CatA2 (PP_3166) ) or ( CatA (PP_3713) )	( PP_3166 or PP_3713 )	( CatA2 ) or ( CatA )	0	0	1000
COALCDH	coniferyl-alcohol dehydrogenase	[c] : confrl + nad --> conialdh + h + nadh	B-Ketoadipate pathway					0	0	1000
COALDDH	coniferyl aldehyde dehydrogenase	[c] : conialdh + h2o + nad --> fer + (2) h + nadh	B-Ketoadipate pathway		CalB (PP_5120)	PP_5120	CalB	0	0	1000
COCOAHA	Enoyl-CoA hydratase/aldolase	[c] : 4cmcoa + h2o --> 4hbald + accoa	B-Ketoadipate pathway		Ech (PP_3358)	PP_3358	Ech	0	0	1000
DHSKDH	dehydroshikimate dehydratase	[c] : 3dhsk --> 34dhbz + h2o	B-Ketoadipate pathway		QuiC (PP_2554)	PP_2554	QuiC	0	0	1000
FCOAHA	enoyl-coa hydratase/aldolase	[c] : ferulcoa + h2o --> accoa + vanln	B-Ketoadipate pathway	4.1.2.41	Ech (PP_3358)	PP_3358	Ech	0	0	1000
FERULCOAS	feruloyl coenzyme A synthetase (AMP forming)	[c] : atp + coa + fer --> amp + ferulcoa + ppi	B-Ketoadipate pathway	6.2.1.12	Fcs (PP_3356)	PP_3356	Fcs	0	0	1000
MUCCY-kt	3-carboxy-cis,cis-muconate cycloisomerase	[c] : CCbuttc + h --> 4cml	B-Ketoadipate pathway	5.5.1.2	PcaB (PP_1379)	PP_1379	PcaB	0	0	1000
MUCCYCI	muconate cycloisomerase	[c] : ccmuac + h <==> mucl	B-Ketoadipate pathway	5.5.1.1	CatB (PP_3715)	PP_3715	CatB	0	-1000	1000
MUCLI	mucolactone isomerase	[c] : mucl <==> 5odhf2a	B-Ketoadipate pathway	5.3.3.4	CatC (PP_3714)	PP_3714	CatC	0	-1000	1000
OXOAEL	3-oxoadipate enol-lactone hydrolase	[c] : 5odhf2a + h2o --> 3oxoadp + h	B-Ketoadipate pathway	3.1.1.24	PcaD (PP_1380)	PP_1380	PcaD	0	0	1000
PCADYOX	protocatechuate 3,4-dioxygenase	[c] : 34dhbz + o2 --> CCbuttc + (2) h	B-Ketoadipate pathway	1.13.11.3	PcaGH ( PP_4655 and PP_4656 )	( PP_4655 and PP_4656 )	PcaGH	0	0	1000
QUIDH	quinate dehydrogenase (pyrroloquinoline-quinone)	[c] : pqq + quin-kt --> 3dhq + pqqh2	B-Ketoadipate pathway	1.1.99.25	QuiA (PP_3569)	PP_3569	QuiA	0	0	1000
UHBZ1t(pp)	4-hydroxy benzoate reversible transport via proton symport (periplasm)	4hbz[p] + h[p] <==> 4hbz[c] + h[c]	B-Ketoadipate pathway		PcaK (PP_1376)	PP_1376	PcaK	0	-1000	1000
VNDH	Vanillin:NAD oxidoreductase	[c] : h2o + nad + vanln --> (2) h + nadh + vanlt	B-Ketoadipate pathway	1.2.1.67	Vdh (PP_3357)	PP_3357	Vdh	0	0	1000
VNDH-2	vanillin:NAD oxidoreductase (4hbald)	[c] : 4hbald + h2o + nad --> 4hbz + (2) h + nadh	B-Ketoadipate pathway	1.2.1.67	Vdh (PP_3357)	PP_3357	Vdh	0	0	1000
VNDH-3	Vanillin: NAD oxidoreductase (34dhbald)	[c] : 34dhbald + h2o + nad --> 34dhbz + (2) h + nadh	B-Ketoadipate pathway	1.2.1.67	Vdh (PP_3357)	PP_3357	Vdh	0	0	1000
VNTDM	vanillate:oxygen oxidoreductase (demethylating)	[c] : h + nadh + o2 + vanlt --> 34dhbz + fald + h2o + nad	B-Ketoadipate pathway		VanAB ( PP_3736 and PP_3737 )	( PP_3736 and PP_3737 )	VanAB	0	0	1000
CYSS	cysteine synthase	[c] : acser + h2s --> ac + cys-L + h	Cysteine Metabolism		( CysK (PP_4571) ) or ( CysM (PP_1654) )	( PP_4571 or PP_1654 )	( CysK ) or ( CysM )	0	0	1000
CYSS2	cysteine synthase (S-sulfo-L-cysteine)	[c] : acser + tsul --> ac + scys-L	Cysteine Metabolism		CysM (PP_1654)	PP_1654	CysM	0	0	1000
CYSTRS	Cysteinyl-tRNA synthetase	[c] : atp + cys-L + trnacys --> amp + cystrna + ppi	Cysteine Metabolism	6.1.1.16	CysS (PP_2905)	PP_2905	CysS	0	0	1000
SCYSSL	S-sulfo-L-cysteine sulfite lyase	[c] : (2) gthrd + scys-L <==> cys-L + gthox + h + so3	Cysteine Metabolism					0	-1000	1000
SERAT	serine O-acetyltransferase	[c] : accoa + ser-L <==> acser + coa	Cysteine Metabolism	2.3.1.30	CysE (PP_0840)	PP_0840	CysE	0	-1000	1000
3HAD100	3-hydroxyacyl-[acyl-carrier-protein] dehydratase (n-C10:0)	[c] : 3hdecACP --> h2o + tdec2eACP	Fatty Acid Biosynthesis	4.2.1.60	( FabA (PP_4174) ) or ( FabZ-kt (PP_1602) )	( PP_4174 or PP_1602 )	( FabA ) or ( FabZ-kt )	0	0	1000
3HAD120	3-hydroxyacyl-[acyl-carrier-protein] dehydratase (n-C12:0)	[c] : 3hddecACP --> h2o + tddec2eACP	Fatty Acid Biosynthesis	4.2.1.61	( FabA (PP_4174) ) or ( FabZ-kt (PP_1602) )	( PP_4174 or PP_1602 )	( FabA ) or ( FabZ-kt )	0	0	1000
3HAD121	3-hydroxyacyl-[acyl-carrier-protein] dehydratase (n-C12:1)	[c] : 3hcddec5eACP --> h2o + t3c5ddeceACP	Fatty Acid Biosynthesis	4.2.1.61	( FabA (PP_4174) ) or ( FabZ-kt (PP_1602) )	( PP_4174 or PP_1602 )	( FabA ) or ( FabZ-kt )	0	0	1000
3HAD140	3-hydroxyacyl-[acyl-carrier-protein] dehydratase (n-C14:0)	[c] : 3hmrsACP --> h2o + tmrs2eACP	Fatty Acid Biosynthesis	4.2.1.61	( FabA (PP_4174) ) or ( FabZ-kt (PP_1602) )	( PP_4174 or PP_1602 )	( FabA ) or ( FabZ-kt )	0	0	1000
3HAD141	3-hydroxyacyl-[acyl-carrier-protein] dehydratase (n-C14:1)	[c] : 3hcmrs7eACP --> h2o + t3c7mrseACP	Fatty Acid Biosynthesis	4.2.1.61	( FabA (PP_4174) ) or ( FabZ-kt (PP_1602) )	( PP_4174 or PP_1602 )	( FabA ) or ( FabZ-kt )	0	0	1000
3HAD160	3-hydroxyacyl-[acyl-carrier-protein] dehydratase (n-C16:0)	[c] : 3hpalmACP --> h2o + tpalm2eACP	Fatty Acid Biosynthesis	4.2.1.61	( FabA (PP_4174) ) or ( FabZ-kt (PP_1602) )	( PP_4174 or PP_1602 )	( FabA ) or ( FabZ-kt )	0	0	1000
3HAD161	3-hydroxyacyl-[acyl-carrier-protein] dehydratase (n-C16:1)	[c] : 3hcpalm9eACP --> h2o + t3c9palmeACP	Fatty Acid Biosynthesis	4.2.1.61	( FabA (PP_4174) ) or ( FabZ-kt (PP_1602) )	( PP_4174 or PP_1602 )	( FabA ) or ( FabZ-kt )	0	0	1000
3HAD180	3-hydroxyacyl-[acyl-carrier-protein] dehydratase (n-C18:0)	[c] : 3hoctaACP --> h2o + toctd2eACP	Fatty Acid Biosynthesis	4.2.1.61	( FabA (PP_4174) ) or ( FabZ-kt (PP_1602) )	( PP_4174 or PP_1602 )	( FabA ) or ( FabZ-kt )	0	0	1000
3HAD181	3-hydroxyacyl-[acyl-carrier-protein] dehydratase (n-C18:1)	[c] : 3hcvac11eACP --> h2o + t3c11vaceACP	Fatty Acid Biosynthesis	4.2.1.61	( FabA (PP_4174) ) or ( FabZ-kt (PP_1602) )	( PP_4174 or PP_1602 )	( FabA ) or ( FabZ-kt )	0	0	1000
3HAD40	3-hydroxyacyl-[acyl-carrier-protein] dehydratase (n-C4:0)	[c] : 3haACP --> but2eACP + h2o	Fatty Acid Biosynthesis	4.2.1.58	( FabA (PP_4174) ) or ( FabZ-kt (PP_1602) )	( PP_4174 or PP_1602 )	( FabA ) or ( FabZ-kt )	0	0	1000
3HAD60	3-hydroxyacyl-[acyl-carrier-protein] dehydratase (n-C6:0)	[c] : 3hhexACP --> h2o + thex2eACP	Fatty Acid Biosynthesis	4.2.1.58	( FabA (PP_4174) ) or ( FabZ-kt (PP_1602) )	( PP_4174 or PP_1602 )	( FabA ) or ( FabZ-kt )	0	0	1000
3HAD80	3-hydroxyacyl-[acyl-carrier-protein] dehydratase (n-C8:0)	[c] : 3hoctACP --> h2o + toct2eACP	Fatty Acid Biosynthesis	4.2.1.58	( FabA (PP_4174) ) or ( FabZ-kt (PP_1602) )	( PP_4174 or PP_1602 )	( FabA ) or ( FabZ-kt )	0	0	1000
3OAR100	3-oxoacyl-[acyl-carrier-protein] reductase (n-C10:0)	[c] : 3odecACP + h + nadph <==> 3hdecACP + nadp	Fatty Acid Biosynthesis	1.1.1.100	FabG (PP_1914)	PP_1914	FabG	0	-1000	1000
3OAR120	3-oxoacyl-[acyl-carrier-protein] reductase (n-C12:0)	[c] : 3oddecACP + h + nadph <==> 3hddecACP + nadp	Fatty Acid Biosynthesis	1.1.1.100	FabG (PP_1914)	PP_1914	FabG	0	-1000	1000
3OAR121	3-oxoacyl-[acyl-carrier-protein] reductase (n-C12:1)	[c] : 3ocddec5eACP + h + nadph --> 3hcddec5eACP + nadp	Fatty Acid Biosynthesis	1.1.1.100	FabG (PP_1914)	PP_1914	FabG	0	0	1000
3OAR140	3-oxoacyl-[acyl-carrier-protein] reductase (n-C14:0)	[c] : 3omrsACP + h + nadph <==> 3hmrsACP + nadp	Fatty Acid Biosynthesis	1.1.1.100	FabG (PP_1914)	PP_1914	FabG	0	-1000	1000
3OAR141	3-oxoacyl-[acyl-carrier-protein] reductase (n-C14:1)	[c] : 3ocmrs7eACP + h + nadph --> 3hcmrs7eACP + nadp	Fatty Acid Biosynthesis	1.1.1.100	FabG (PP_1914)	PP_1914	FabG	0	0	1000
3OAR160	3-oxoacyl-[acyl-carrier-protein] reductase (n-C16:0)	[c] : 3opalmACP + h + nadph <==> 3hpalmACP + nadp	Fatty Acid Biosynthesis	1.1.1.100	FabG (PP_1914)	PP_1914	FabG	0	-1000	1000
3OAR161	3-oxoacyl-[acyl-carrier-protein] reductase (n-C16:1)	[c] : 3ocpalm9eACP + h + nadph --> 3hcpalm9eACP + nadp	Fatty Acid Biosynthesis	1.1.1.100	FabG (PP_1914)	PP_1914	FabG	0	0	1000
3OAR180	3-oxoacyl-[acyl-carrier-protein] reductase (n-C18:0)	[c] : 3ooctdACP + h + nadph <==> 3hoctaACP + nadp	Fatty Acid Biosynthesis	1.1.1.100	FabG (PP_1914)	PP_1914	FabG	0	-1000	1000
3OAR181	3-oxoacyl-[acyl-carrier-protein] reductase (n-C18:1)	[c] : 3ocvac11eACP + h + nadph --> 3hcvac11eACP + nadp	Fatty Acid Biosynthesis	1.1.1.100	FabG (PP_1914)	PP_1914	FabG	0	0	1000
3OAR40	3-oxoacyl-[acyl-carrier-protein] reductase (n-C4:0)	[c] : actACP + h + nadph <==> 3haACP + nadp	Fatty Acid Biosynthesis	1.1.1.100	FabG (PP_1914)	PP_1914	FabG	0	-1000	1000
3OAR60	3-oxoacyl-[acyl-carrier-protein] reductase (n-C6:0)	[c] : 3ohexACP + h + nadph <==> 3hhexACP + nadp	Fatty Acid Biosynthesis	1.1.1.100	FabG (PP_1914)	PP_1914	FabG	0	-1000	1000
3OAR80	3-oxoacyl-[acyl-carrier-protein] reductase (n-C8:0)	[c] : 3ooctACP + h + nadph <==> 3hoctACP + nadp	Fatty Acid Biosynthesis	1.1.1.100	FabG (PP_1914)	PP_1914	FabG	0	-1000	1000
3OAS100	3-oxoacyl-[acyl-carrier-protein] synthase (n-C10:0)	[c] : h + malACP + ocACP --> 3odecACP + ACP + co2	Fatty Acid Biosynthesis	2.3.1.41	( FabF (PP_1916) ) or ( FabB (PP_4175) )	( PP_1916 or PP_4175 )	( FabF ) or ( FabB )	0	0	1000
3OAS120	3-oxoacyl-[acyl-carrier-protein] synthase (n-C12:0)	[c] : dcaACP + h + malACP --> 3oddecACP + ACP + co2	Fatty Acid Biosynthesis	2.3.1.41	( FabF (PP_1916) ) or ( FabB (PP_4175) )	( PP_1916 or PP_4175 )	( FabF ) or ( FabB )	0	0	1000
3OAS121	3-oxoacyl-[acyl-carrier-protein] synthase (n-C12:1)	[c] : cdec3eACP + h + malACP --> 3ocddec5eACP + ACP + co2	Fatty Acid Biosynthesis	2.3.1.41	FabB (PP_4175)	PP_4175	FabB	0	0	1000
3OAS140	3-oxoacyl-[acyl-carrier-protein] synthase (n-C14:0)	[c] : ddcaACP + h + malACP --> 3omrsACP + ACP + co2	Fatty Acid Biosynthesis	2.3.1.41	( FabF (PP_1916) ) or ( FabB (PP_4175) )	( PP_1916 or PP_4175 )	( FabF ) or ( FabB )	0	0	1000
3OAS141	3-oxoacyl-[acyl-carrier-protein] synthase (n-C14:1)	[c] : cddec5eACP + h + malACP --> 3ocmrs7eACP + ACP + co2	Fatty Acid Biosynthesis	2.3.1.41	FabB (PP_4175)	PP_4175	FabB	0	0	1000
3OAS160	3-oxoacyl-[acyl-carrier-protein] synthase (n-C16:0)	[c] : h + malACP + myrsACP --> 3opalmACP + ACP + co2	Fatty Acid Biosynthesis	2.3.1.41	( FabF (PP_1916) ) or ( FabB (PP_4175) )	( PP_1916 or PP_4175 )	( FabF ) or ( FabB )	0	0	1000
3OAS161	3-oxoacyl-[acyl-carrier-protein] synthase (n-C16:1)	[c] : h + malACP + tdeACP --> 3ocpalm9eACP + ACP + co2	Fatty Acid Biosynthesis	2.3.1.41	FabB (PP_4175)	PP_4175	FabB	0	0	1000
3OAS180	3-oxoacyl-[acyl-carrier-protein] synthase (n-C18:0)	[c] : h + malACP + palmACP --> 3ooctdACP + ACP + co2	Fatty Acid Biosynthesis	2.3.1.41	FabB (PP_4175)	PP_4175	FabB	0	0	1000
3OAS181	3-oxoacyl-[acyl-carrier-protein] synthase (n-C18:1)	[c] : h + hdeACP + malACP --> 3ocvac11eACP + ACP + co2	Fatty Acid Biosynthesis	2.3.1.41	FabB (PP_4175)	PP_4175	FabB	0	0	1000
3OAS60	3-oxoacyl-[acyl-carrier-protein] synthase (n-C6:0)	[c] : butACP + h + malACP --> 3ohexACP + ACP + co2	Fatty Acid Biosynthesis	2.3.1.41	( FabF (PP_1916) ) or ( FabB (PP_4175) )	( PP_1916 or PP_4175 )	( FabF ) or ( FabB )	0	0	1000
3OAS80	3-oxoacyl-[acyl-carrier-protein] synthase (n-C8:0)	[c] : h + hexACP + malACP --> 3ooctACP + ACP + co2	Fatty Acid Biosynthesis	2.3.1.41	( FabF (PP_1916) ) or ( FabB (PP_4175) )	( PP_1916 or PP_4175 )	( FabF ) or ( FabB )	0	0	1000
ACCOACr	acetyl-CoA carboxylase, reversible reaction	[c] : accoa + atp + hco3 <==> adp + h + malcoa + pi	Fatty Acid Biosynthesis	6.4.1.2	( AccA (PP_1607) and AccB (PP_0559) and AccC-kt1 (PP_0558) and AccD (PP_1996) )	( PP_1607 and PP_0559 and PP_0558 and PP_1996 )	( AccA and AccB and AccC-kt1 and AccD )	0	-1000	1000
ACOATA	Acetyl-CoA ACP transacylase	[c] : ACP + accoa <==> acACP + coa	Fatty Acid Biosynthesis	2.3.1.38	FabB (PP_4175)	PP_4175	FabB	0	-1000	1000
CFAS160E	cyclopropane fatty acid synthase (Phosphatidylethanolamine, n-C16:0)	[c] : (2) amet + pe161 --> (2) ahcys + cpe160 + (2) h	Fatty Acid Biosynthesis	2.1.1.79	Cfa (PP_2734)	PP_2734	Cfa	0	0	1000
CFAS160G	cyclopropane fatty acid synthase (Phosphatidylglycerol, n-C16:0)	[c] : (2) amet + pg161 --> (2) ahcys + cpg160 + (2) h	Fatty Acid Biosynthesis	2.1.1.79	Cfa (PP_2734)	PP_2734	Cfa	0	0	1000
CFAS180E	cyclopropane fatty acid synthase (Phosphatidylethanolamine, n-C18:0)	[c] : (2) amet + pe181 --> (2) ahcys + cpe180 + (2) h	Fatty Acid Biosynthesis	2.1.1.79	Cfa (PP_2734)	PP_2734	Cfa	0	0	1000
CFAS180G	cyclopropane fatty acid synthase (Phosphatidylglycerol, n-C18:0)	[c] : (2) amet + pg181 --> (2) ahcys + cpg180 + (2) h	Fatty Acid Biosynthesis	2.1.1.79	Cfa (PP_2734)	PP_2734	Cfa	0	0	1000
EAR100y	enoyl-[acyl-carrier-protein] reductase (NADPH) (n-C10:0)	[c] : h + nadph + tdec2eACP --> dcaACP + nadp	Fatty Acid Biosynthesis	1.3.1.10				0	0	1000
EAR120y	enoyl-[acyl-carrier-protein] reductase (NADPH) (n-C12:0)	[c] : h + nadph + tddec2eACP --> ddcaACP + nadp	Fatty Acid Biosynthesis	1.3.1.10				0	0	1000
EAR121y	enoyl-[acyl-carrier-protein] reductase (NADPH) (n-C12:1)	[c] : h + nadph + t3c5ddeceACP --> cddec5eACP + nadp	Fatty Acid Biosynthesis	1.3.1.10				0	0	1000
EAR140y	enoyl-[acyl-carrier-protein] reductase (NADPH) (n-C14:0)	[c] : h + nadph + tmrs2eACP --> myrsACP + nadp	Fatty Acid Biosynthesis	1.3.1.10				0	0	1000
EAR141y	enoyl-[acyl-carrier-protein] reductase (NADPH) (n-C14:1)	[c] : h + nadph + t3c7mrseACP --> nadp + tdeACP	Fatty Acid Biosynthesis	1.3.1.10				0	0	1000
EAR160y	enoyl-[acyl-carrier-protein] reductase (NADPH) (n-C16:0)	[c] : h + nadph + tpalm2eACP --> nadp + palmACP	Fatty Acid Biosynthesis	1.3.1.10				0	0	1000
EAR161y	enoyl-[acyl-carrier-protein] reductase (NADPH) (n-C16:1)	[c] : h + nadph + t3c9palmeACP --> hdeACP + nadp	Fatty Acid Biosynthesis	1.3.1.10				0	0	1000
EAR180y	enoyl-[acyl-carrier-protein] reductase (NADPH) (n-C18:0)	[c] : h + nadph + toctd2eACP --> nadp + ocdcaACP	Fatty Acid Biosynthesis	1.3.1.10				0	0	1000
EAR181y	enoyl-[acyl-carrier-protein] reductase (NADPH) (n-C18:1)	[c] : h + nadph + t3c11vaceACP --> nadp + octeACP	Fatty Acid Biosynthesis	1.3.1.10				0	0	1000
EAR40y	enoyl-[acyl-carrier-protein] reductase (NADPH) (n-C4:0)	[c] : but2eACP + h + nadph --> butACP + nadp	Fatty Acid Biosynthesis	1.3.1.10				0	0	1000
EAR60y	enoyl-[acyl-carrier-protein] reductase (NADPH) (n-C6:0)	[c] : h + nadph + thex2eACP --> hexACP + nadp	Fatty Acid Biosynthesis	1.3.1.10				0	0	1000
EAR80y	enoyl-[acyl-carrier-protein] reductase (NADPH) (n-C8:0)	[c] : h + nadph + toct2eACP --> nadp + ocACP	Fatty Acid Biosynthesis	1.3.1.10				0	0	1000
KAS14	beta-ketoacyl-ACP synthase	[c] : acACP + h + malACP --> ACP + actACP + co2	Fatty Acid Biosynthesis	2.3.1.41	FabB (PP_4175)	PP_4175	FabB	0	0	1000
KAS15	beta-ketoacyl-ACP synthase (2)	[c] : accoa + h + malACP --> actACP + co2 + coa	Fatty Acid Biosynthesis		FabH-1 (PP_4379)	PP_4379	FabH-1	0	0	1000
MACPD	Malonyl-ACP decarboxylase	[c] : h + malACP --> acACP + co2	Fatty Acid Biosynthesis		FabB (PP_4175)	PP_4175	FabB	0	0	1000
MCOATA	Malonyl-CoA-ACP transacylase	[c] : ACP + malcoa <==> coa + malACP	Fatty Acid Biosynthesis	2.3.1.39	FabD (PP_1913)	PP_1913	FabD	0	-1000	1000
T2DECAI	trans-2-decenoyl-ACP isomerase	[c] : tdec2eACP <==> cdec3eACP	Fatty Acid Biosynthesis		FabA (PP_4174)	PP_4174	FabA	0	-1000	1000
ACACT1r	acetyl-CoA C-acetyltransferase	[c] : (2) accoa <==> aacoa + coa	Fatty Acid Metabolism	2.3.1.9	AtoB (PP_2051)	PP_2051	AtoB	0	-1000	1000
ACOAD1f	acyl-CoA dehydrogenase (butanoyl-CoA)	[c] : btcoa + fad <==> b2coa + fadh2	Fatty Acid Metabolism	1.3.99.2	( FadE (PP_1893) ) or ( FadFx (PP_2216) )	( PP_1893 or PP_2216 )	( FadE ) or ( FadFx )	0	-1000	1000
ACOAD2f	acyl-CoA dehydrogenase (hexanoyl-CoA)	[c] : fad + hxcoa <==> fadh2 + hx2coa	Fatty Acid Metabolism	1.3.99.3	( FadE (PP_1893) ) or ( FadFx (PP_2216) )	( PP_1893 or PP_2216 )	( FadE ) or ( FadFx )	0	-1000	1000
ACOAD3f	acyl-CoA dehydrogenase (octanoyl-CoA)	[c] : fad + occoa <==> fadh2 + oc2coa	Fatty Acid Metabolism	1.3.99.3	FadE (PP_1893)	PP_1893	FadE	0	-1000	1000
ACOAD4f	acyl-CoA dehydrogenase (decanoyl-CoA)	[c] : dcacoa + fad <==> dc2coa + fadh2	Fatty Acid Metabolism	1.3.99.3	FadE (PP_1893)	PP_1893	FadE	0	-1000	1000
ACOAD5f	acyl-CoA dehydrogenase (dodecanoyl-CoA)	[c] : ddcacoa + fad <==> dd2coa + fadh2	Fatty Acid Metabolism	1.3.99.3	FadE (PP_1893)	PP_1893	FadE	0	-1000	1000
ACOAD6f	acyl-CoA dehydrogenase (tetradecanoyl-CoA)	[c] : fad + tdcoa <==> fadh2 + td2coa	Fatty Acid Metabolism	1.3.99.3	FadE (PP_1893)	PP_1893	FadE	0	-1000	1000
ACOAD7f	acyl-CoA dehydrogenase (hexadecanoyl-CoA)	[c] : fad + pmtcoa <==> fadh2 + hdd2coa	Fatty Acid Metabolism	1.3.99.3	FadE (PP_1893)	PP_1893	FadE	0	-1000	1000
ECOAH1	3-hydroxyacyl-CoA dehydratase (3-hydroxybutanoyl-CoA)	[c] : 3hbcoa <==> b2coa + h2o	Fatty Acid Metabolism	4.2.1.17	( FadB1x (PP_2217) ) or ( FadB-kt (PP_2136) )	( PP_2217 or PP_2136 )	( FadB1x ) or ( FadB-kt )	0	-1000	1000
ECOAH2	3-hydroxyacyl-CoA dehydratase (3-hydroxyhexanoyl-CoA)	[c] : 3hhcoa <==> h2o + hx2coa	Fatty Acid Metabolism	4.2.1.17	( FadB1x (PP_2217) ) or ( FadB-kt (PP_2136) )	( PP_2217 or PP_2136 )	( FadB1x ) or ( FadB-kt )	0	-1000	1000
ECOAH3	3-hydroxyacyl-CoA dehydratase (3-hydroxyoctanoyl-CoA)	[c] : 3hocoa <==> h2o + oc2coa	Fatty Acid Metabolism	4.2.1.17	( FadB1x (PP_2217) ) or ( FadB-kt (PP_2136) )	( PP_2217 or PP_2136 )	( FadB1x ) or ( FadB-kt )	0	-1000	1000
ECOAH4	3-hydroxyacyl-CoA dehydratase (3-hydroxydecanoyl-CoA)	[c] : 3hdcoa <==> dc2coa + h2o	Fatty Acid Metabolism	4.2.1.17	( FadB1x (PP_2217) ) or ( FadB-kt (PP_2136) )	( PP_2217 or PP_2136 )	( FadB1x ) or ( FadB-kt )	0	-1000	1000
ECOAH5	3-hydroxyacyl-CoA dehydratase (3-hydroxydodecanoyl-CoA)	[c] : 3hddcoa <==> dd2coa + h2o	Fatty Acid Metabolism	4.2.1.17	( FadB1x (PP_2217) ) or ( FadB-kt (PP_2136) )	( PP_2217 or PP_2136 )	( FadB1x ) or ( FadB-kt )	0	-1000	1000
ECOAH6	3-hydroxyacyl-CoA dehydratase (3-hydroxytetradecanoyl-CoA)	[c] : 3htdcoa <==> h2o + td2coa	Fatty Acid Metabolism	4.2.1.17	( FadB1x (PP_2217) ) or ( FadB-kt (PP_2136) )	( PP_2217 or PP_2136 )	( FadB1x ) or ( FadB-kt )	0	-1000	1000
ECOAH7	3-hydroxyacyl-CoA dehydratase (3-hydroxyhexadecanoyl-CoA)	[c] : 3hhdcoa <==> h2o + hdd2coa	Fatty Acid Metabolism	4.2.1.17	( FadB1x (PP_2217) ) or ( FadB-kt (PP_2136) )	( PP_2217 or PP_2136 )	( FadB1x ) or ( FadB-kt )	0	-1000	1000
FACOAL100t2pp	fatty-acid-CoA ligase (decanoate transport via vectoral Co-A coupling)	atp[c] + coa[c] + dca[p] + h[p] --> amp[c] + dcacoa[c] + h[c] + ppi[c]	Fatty Acid Metabolism	6.2.1.3	( FadD ( PP_2213 ) or ( PP_4549 ) ) or ( FadD2 (PP_4550) )	( ( PP_2213 or PP_4549 ) or PP_4550 )	( FadD ) or ( FadD2 )	0	0	1000
FACOAL120t2pp	fatty-acid-CoA ligase (dodecanoate transport via vectoral Co-A coupling)	atp[c] + coa[c] + ddca[p] + h[p] --> amp[c] + ddcacoa[c] + h[c] + ppi[c]	Fatty Acid Metabolism	6.2.1.3	( FadD ( PP_2213 ) or ( PP_4549 ) ) or ( FadD2 (PP_4550) )	( ( PP_2213 or PP_4549 ) or PP_4550 )	( FadD ) or ( FadD2 )	0	0	1000
FACOAL140t2pp	fatty-acid-CoA ligase (tetradecanoate transport via vectoral Co-A coupling)	atp[c] + coa[c] + h[p] + ttdca[p] --> amp[c] + h[c] + ppi[c] + tdcoa[c]	Fatty Acid Metabolism	6.2.1.3	( FadD ( PP_2213 ) or ( PP_4549 ) ) or ( FadD2 (PP_4550) )	( ( PP_2213 or PP_4549 ) or PP_4550 )	( FadD ) or ( FadD2 )	0	0	1000
FACOAL160t2pp	fatty-acid-CoA ligase (hexadecanoate transport via vectoral Co-A coupling)	atp[c] + coa[c] + h[p] + hdca[p] --> amp[c] + h[c] + pmtcoa[c] + ppi[c]	Fatty Acid Metabolism	6.2.1.3	( FadD ( PP_2213 ) or ( PP_4549 ) ) or ( FadD2 (PP_4550) )	( ( PP_2213 or PP_4549 ) or PP_4550 )	( FadD ) or ( FadD2 )	0	0	1000
FACOAL60t2pp	fatty-acid-CoA ligase (hexanoate transport via vectoral Co-A coupling)	atp[c] + coa[c] + h[p] + hxa[p] --> amp[c] + h[c] + hxcoa[c] + ppi[c]	Fatty Acid Metabolism	6.2.1.3	( FadD ( PP_2213 ) or ( PP_4549 ) ) or ( FadD2 (PP_4550) )	( ( PP_2213 or PP_4549 ) or PP_4550 )	( FadD ) or ( FadD2 )	0	0	1000
FACOAL80t2pp	fatty-acid-CoA ligase (octanoate transport via vectoral Co-A coupling)	atp[c] + coa[c] + h[p] + octa[p] --> amp[c] + h[c] + occoa[c] + ppi[c]	Fatty Acid Metabolism	6.2.1.3	( FadD ( PP_2213 ) or ( PP_4549 ) ) or ( FadD2 (PP_4550) )	( ( PP_2213 or PP_4549 ) or PP_4550 )	( FadD ) or ( FadD2 )	0	0	1000
HACD1i	3-hydroxyacyl-CoA dehydrogenase (acetoacetyl-CoA)	[c] : 3hbcoa + nad --> aacoa + h + nadh	Fatty Acid Metabolism	1.1.1.35	( FadB-kt (PP_2136) ) or ( FadB2x (PP_2214) )	( PP_2136 or PP_2214 )	( FadB-kt ) or ( FadB2x )	0	0	1000
HACD2i	3-hydroxyacyl-CoA dehydrogenase (3-oxohexanoyl-CoA)	[c] : 3hhcoa + nad --> 3ohcoa + h + nadh	Fatty Acid Metabolism	1.1.1.35	( FadB-kt (PP_2136) ) or ( FadB2x (PP_2214) )	( PP_2136 or PP_2214 )	( FadB-kt ) or ( FadB2x )	0	0	1000
HACD3i	3-hydroxyacyl-CoA dehydrogenase (3-oxooctanoyl-CoA)	[c] : 3hocoa + nad --> 3oocoa + h + nadh	Fatty Acid Metabolism	1.1.1.35	( FadB-kt (PP_2136) ) or ( FadB2x (PP_2214) )	( PP_2136 or PP_2214 )	( FadB-kt ) or ( FadB2x )	0	0	1000
HACD4i	3-hydroxyacyl-CoA dehydrogenase (3-oxodecanoyl-CoA)	[c] : 3hdcoa + nad --> 3odcoa + h + nadh	Fatty Acid Metabolism	1.1.1.35	( FadB-kt (PP_2136) ) or ( FadB2x (PP_2214) )	( PP_2136 or PP_2214 )	( FadB-kt ) or ( FadB2x )	0	0	1000
HACD5i	3-hydroxyacyl-CoA dehydrogenase (3-oxododecanoyl-CoA)	[c] : 3hddcoa + nad --> 3oddcoa + h + nadh	Fatty Acid Metabolism	1.1.1.35	( FadB-kt (PP_2136) ) or ( FadB2x (PP_2214) )	( PP_2136 or PP_2214 )	( FadB-kt ) or ( FadB2x )	0	0	1000
HACD6i	3-hydroxyacyl-CoA dehydrogenase (3-oxotetradecanoyl-CoA)	[c] : 3htdcoa + nad --> 3otdcoa + h + nadh	Fatty Acid Metabolism	1.1.1.35	( FadB-kt (PP_2136) ) or ( FadB2x (PP_2214) )	( PP_2136 or PP_2214 )	( FadB-kt ) or ( FadB2x )	0	0	1000
HACD7i	3-hydroxyacyl-CoA dehydrogenase (3-oxohexadecanoyl-CoA)	[c] : 3hhdcoa + nad --> 3ohdcoa + h + nadh	Fatty Acid Metabolism	1.1.1.35	( FadB-kt (PP_2136) ) or ( FadB2x (PP_2214) )	( PP_2136 or PP_2214 )	( FadB-kt ) or ( FadB2x )	0	0	1000
KAT1	3-ketoacyl-CoA thiolase	[c] : aacoa + coa --> (2) accoa	Fatty Acid Metabolism	2.3.1.16	( FadA (PP_2137) ) or ( FadAx (PP_2215) )	( PP_2137 or PP_2215 )	( FadA ) or ( FadAx )	0	0	1000
KAT2	3-ketoacyl-CoA thiolase	[c] : 3ohcoa + coa --> accoa + btcoa	Fatty Acid Metabolism	2.3.1.16	( FadA (PP_2137) ) or ( FadAx (PP_2215) )	( PP_2137 or PP_2215 )	( FadA ) or ( FadAx )	0	0	1000
KAT3	3-ketoacyl-CoA thiolase	[c] : 3oocoa + coa --> accoa + hxcoa	Fatty Acid Metabolism	2.3.1.16	FadA (PP_2137)	PP_2137	FadA	0	0	1000
KAT4	3-ketoacyl-CoA thiolase	[c] : 3odcoa + coa --> accoa + occoa	Fatty Acid Metabolism	2.3.1.16	FadA (PP_2137)	PP_2137	FadA	0	0	1000
KAT5	3-ketoacyl-CoA thiolase	[c] : 3oddcoa + coa --> accoa + dcacoa	Fatty Acid Metabolism	2.3.1.16	FadA (PP_2137)	PP_2137	FadA	0	0	1000
KAT6	3-ketoacyl-CoA thiolase	[c] : 3otdcoa + coa --> accoa + ddcacoa	Fatty Acid Metabolism	2.3.1.16	FadA (PP_2137)	PP_2137	FadA	0	0	1000
KAT7	3-ketoacyl-CoA thiolase	[c] : 3ohdcoa + coa --> accoa + tdcoa	Fatty Acid Metabolism	2.3.1.16	FadA (PP_2137)	PP_2137	FadA	0	0	1000
RNADRr	Rubredoxin-NAD reductase reversible	[c] : nadh + rbrdxOX <==> h + nad + rbrdxRD	Fatty Acid Metabolism	1.18.1.1	RubB (PP_5314)	PP_5314	RubB	0	-1000	1000
ADCL	4-aminobenzoate synthase	[c] : 4adcho --> 4abz + h + pyr	Folate Biosynthesis		PabC (PP_1917)	PP_1917	PabC	0	0	1000
DHFS	dihydrofolate synthase	[c] : atp + dhpt + glu-L --> adp + dhf + h + pi	Folate Biosynthesis	6.3.2.12	FolC (PP_1997)	PP_1997	FolC	0	0	1000
DHNPA	dihydroneopterin aldolase	[c] : dhnpt --> 2ahhmp + gcald + h	Folate Biosynthesis	4.1.2.25	FolB (PP_0392)	PP_0392	FolB	0	0	1000
DHPS	dihydropteroate synthase	[c] : 2ahhmp + 4abz --> dhpt + h2o	Folate Biosynthesis	2.5.1.15	FolP (PP_4717)	PP_4717	FolP	0	0	1000
DNMPPA	Dihydroneopterin monophosphate dephosphorylase	[c] : dhpmp + h2o --> dhnpt + pi	Folate Biosynthesis		( CtpA-kt (PP_4261) ) or ( CadA-2 (PP_5139) )	( PP_4261 or PP_5139 )	( CtpA-kt ) or ( CadA-2 )	0	0	1000
DNTPPA	Dihydroneopterin triphosphate pyrophosphatase	[c] : ahdt + h2o --> dhpmp + h + ppi	Folate Biosynthesis		( CtpA-kt (PP_4261) ) or ( CadA-2 (PP_5139) )	( PP_4261 or PP_5139 )	( CtpA-kt ) or ( CadA-2 )	0	0	1000
FOLD3	dihydropteroate synthase	[c] : 2ahhmd + 4abz --> dhpt + ppi	Folate Biosynthesis	2.5.1.15	FolP (PP_4717)	PP_4717	FolP	0	0	1000
GCALDD	Glycolaldehyde dehydrogenase	[c] : gcald + h2o + nad --> glyclt + (2) h + nadh	Folate Biosynthesis	1.2.1.21				0	0	1000
GTPCI	GTP cyclohydrolase I	[c] : gtp + h2o --> ahdt + for + h	Folate Biosynthesis	3.5.4.16	( FolE-kt1 (PP_1823) ) or ( FolE-kt2 (PP_2512) )	( PP_1823 or PP_2512 )	( FolE-kt1 ) or ( FolE-kt2 )	0	0	1000
HPPK	2-amino-4-hydroxy-6-hydroxymethyldihydropteridine diphosphokinase	[c] : 2ahhmp + atp --> 2ahhmd + amp + h	Folate Biosynthesis	2.7.6.3	Folk-2 (PP_4698)	PP_4698	Folk-2	0	0	1000
PABB	pabb	[c] : chor + nh4 --> 4adcho + h2o	Folate Biosynthesis		PabB (PP_2329)	PP_2329	PabB	0	0	1000
FRUK_r	fructose-1-phosphate kinase reversible	[c] : atp + f1p <==> adp + fdp + h	Fructose Metabolism	2.7.1.56	FruK (PP_0794)	PP_0794	FruK	0	-1000	1000
FRUpts	D-fructose transport via PEP:Pyr PTS	fru[e] + pep[c] --> f1p[c] + pyr[c]	Fructose Metabolism		( FruA (PP_0795) and FruB (PP_0793) )	( PP_0795 and PP_0793 )	( FruA and FruB )	0	0	1000
GADOX	Gallic acid dioxygenase	[c] : ga + o2 --> (2) h + omaketo	Gallic acid Metabolism		GalA-kt (PP_2518)	PP_2518	GalA-kt	0	0	1000
OCAALD	4-oxalcitromalate aldolase	[c] : oca --> oaa + pyr	Gallic acid Metabolism	4.1.3.17				0	0	1000
OMAHY	4-oxalmesaconate hydratase	[c] : h2o + omaenol --> oca	Gallic acid Metabolism	4.2.1.80				0	0	1000
OMAIS	4-oxalmesaconate isomerase	[c] : omaketo <==> omaenol	Gallic acid Metabolism	5.3.3.10				0	-1000	1000
ACSr	acetyl-CoA synthetase reversible	[c] : ac + atp + coa <==> accoa + amp + ppi	Gluconeogenesis	6.2.1.1	( Acs (PP_4487) ) or ( Acs2 (PP_4702) )	( PP_4487 or PP_4702 )	( Acs ) or ( Acs2 )	0	-1000	1000
ENO	enolase	[c] : 2pg <==> h2o + pep	Gluconeogenesis	4.2.1.11	Eno (PP_1612)	PP_1612	Eno	0	-1000	1000
GAPD	glyceraldehyde-3-phosphate dehydrogenase	[c] : g3p + nad + pi <==> 13dpg + h + nadh	Gluconeogenesis	1.2.1.12	Gap (PP_1009)	PP_1009	Gap	0	-1000	1000
PDHa	pyruvate dehydrogenase (lipoamide)	[c] : h + lpam + pyr --> adhlam + co2	Gluconeogenesis	1.2.4.1	AceE (PP_0339)	PP_0339	AceE	0	0	1000
PDHbr	pyruvate dehydrogenase (dihydrolipoamide) reversible	[c] : adhlam + coa <==> accoa + dhlam	Gluconeogenesis	2.3.1.12	AceF (PP_0338)	PP_0338	AceF	0	-1000	1000
PGK	phosphoglycerate kinase	[c] : 3pg + atp <==> 13dpg + adp	Gluconeogenesis	2.7.2.3	Pgk (PP_4963)	PP_4963	Pgk	0	-1000	1000
PGM	phosphoglycerate mutase	[c] : 2pg <==> 3pg	Gluconeogenesis	5.4.2.1	Pgm (PP_5056)	PP_5056	Pgm	0	-1000	1000
PYK	pyruvate kinase	[c] : adp + h + pep --> atp + pyr	Gluconeogenesis	2.7.1.40	( PykA (PP_1362) ) or ( PykF (PP_4301) )	( PP_1362 or PP_4301 )	( PykA ) or ( PykF )	0	0	1000
TPI	triose-phosphate isomerase	[c] : dhap <==> g3p	Gluconeogenesis	5.3.1.1	TpiA (PP_4715)	PP_4715	TpiA	0	-1000	1000
ABTAr	4-aminobutyrate transaminase	[c] : 4abut + akg <==> glu-L + sucsal	Glutamate Metabolism	2.6.1.19	( DavT (PP_0214) ) or ( GabT (PP_4108) )	( PP_0214 or PP_4108 )	( DavT ) or ( GabT )	0	-1000	1000
ASPTA	aspartate transaminase	[c] : akg + asp-L <==> glu-L + oaa	Glutamate Metabolism	2.6.1.1	AspC (PP_3721)	PP_3721	AspC	0	-1000	1000
CBMKr	Carbamate kinase	[c] : atp + co2 + nh4 <==> adp + cbp + (2) h	Glutamate Metabolism	2.7.2.2	ArcC (PP_0999)	PP_0999	ArcC	0	-1000	1000
GF6PTA	glutamine-fructose-6-phosphate transaminase	[c] : f6p + gln-L --> gam6p + glu-L	Glutamate Metabolism	2.6.1.16	GlmS (PP_5409)	PP_5409	GlmS	0	0	1000
GLNS	glutamine synthetase	[c] : atp + glu-L + nh4 --> adp + gln-L + h + pi	Glutamate Metabolism	6.3.1.2	GlnA (PP_5046)	PP_5046	GlnA	0	0	1000
GLNTRAT	glutamyl-tRNA(Gln) amidotransferase	[c] : atp + gln-L + glutrna(gln) + h2o --> adp + glntrna + glu-L + h + pi	Glutamate Metabolism		GatABC ( PP_0930 and PP_0931 and PP_0932 )	( PP_0930 and PP_0931 and PP_0932 )	GatABC	0	0	1000
GLNTRS	Glutaminyl-tRNA synthetase	[c] : atp + gln-L + trnagln --> amp + glntrna + ppi	Glutamate Metabolism	6.1.1.18	GlnS (PP_2904)	PP_2904	GlnS	0	0	1000
GLUCYS	gamma-glutamylcysteine synthetase	[c] : atp + cys-L + glu-L --> adp + glucys + h + pi	Glutamate Metabolism	6.3.2.2	GshA (PP_0243)	PP_0243	GshA	0	0	1000
GLUDy	glutamate dehydrogenase (NADP)	[c] : glu-L + h2o + nadp <==> akg + h + nadph + nh4	Glutamate Metabolism	1.4.1.4	GdhA (PP_0675)	PP_0675	GdhA	0	-1000	1000
GLUN	glutaminase	[c] : gln-L + h2o --> glu-L + nh4	Glutamate Metabolism	3.5.1.2	AnsAkt (PP_2453)	PP_2453	AnsAkt	0	0	1000
GLUR	glutamate racemase	[c] : glu-D <==> glu-L	Glutamate Metabolism	5.1.1.3	Murl (PP_0736)	PP_0736	Murl	0	-1000	1000
GLUSy	glutamate synthase (NADPH)	[c] : akg + gln-L + h + nadph --> (2) glu-L + nadp	Glutamate Metabolism	1.4.1.13	GltBD ( PP_5075 and PP_5076 )	( PP_5075 and PP_5076 )	GltBD	0	0	1000
GLUTRS	Glutamyl-tRNA synthetase	[c] : atp + glu-L + trnaglu --> amp + glutrna + ppi	Glutamate Metabolism	6.1.1.17	GltX (PP_1977)	PP_1977	GltX	0	0	1000
GTHO	glutathione oxidoreductase	[c] : gthox + h + nadph --> (2) gthrd + nadp	Glutamate Metabolism	1.8.1.7	Gor (PP_3819)	PP_3819	Gor	0	0	1000
GTHS	glutathione synthetase	[c] : atp + glucys + gly --> adp + gthrd + h + pi	Glutamate Metabolism	6.3.2.3	GshB (PP_4993)	PP_4993	GshB	0	0	1000
SSALyr	succinate-semialdehyde dehydrogenase (NADP) reversible	[c] : h2o + nadp + sucsal <==> (2) h + nadph + succ	Glutamate Metabolism	1.2.1.16	DavD (PP_0213)	PP_0213	DavD	0	-1000	1000
UAMAGS	UDP-N-acetylmuramoyl-L-alanyl-D-glutamate synthetase	[c] : atp + glu-D + uama --> adp + h + pi + uamag	Glutamate Metabolism	6.3.2.9	MurD (PP_1335)	PP_1335	MurD	0	0	1000
UAMAS	UDP-N-acetylmuramoyl-L-alanine synthetase	[c] : ala-L + atp + uamr --> adp + h + pi + uama	Glutamate metabolism	6.3.2.8	MurC (PP_1338)	PP_1338	MurC	0	0	1000
GLUDC	Glutamate Decarboxylase	[c] : glu-L + h --> 4abut + co2	Glutamate Metabolism	4.1.1.15	SpeA (PP_0567)	PP_0567	SpeA	0	0	1000
GTHP	glutathione peridoxase	[c] : (2) gthrd + h2o2 <==> gthox + (2) h2o	Glutathione Metabolism	1.11.1.9	( GpXkt3 (PP_1874) ) or ( GpXkt2 (PP_1686) ) or ( GpXkt1 (PP_0777) )	( PP_1874 or PP_1686 or PP_0777 )	( GpXkt3 ) or ( GpXkt2 ) or ( GpXkt1 )	0	-1000	1000
AGPAT120	1-tetradecanoyl-sn-glycerol 3-phosphate O-acyltransferase (n-C12:0)	[c] : 1ddecg3p + ddcaACP --> ACP + pa120	Glycerophospholipid Metabolism	2.3.1.51	PlsC (PP_1844)	PP_1844	PlsC	0	0	1000
AGPAT160	1-hexadecanoyl-sn-glycerol 3-phosphate O-acyltransferase (n-C16:0)	[c] : 1hdecg3p + palmACP --> ACP + pa160	Glycerophospholipid Metabolism	2.3.1.51	PlsC (PP_1844)	PP_1844	PlsC	0	0	1000
AGPAT161	1-hexadec-7-enoyl-sn-glycerol 3-phosphate O-acyltransferase (n-C16:1)	[c] : 1hdec9eg3p + hdeACP --> ACP + pa161	Glycerophospholipid Metabolism	2.3.1.51	PlsC (PP_1844)	PP_1844	PlsC	0	0	1000
AGPAT180	1-octadecanoyl-sn-glycerol 3-phosphate O-acyltransferase (n-C18:0)	[c] : 1odecg3p + ocdcaACP --> ACP + pa180	Glycerophospholipid Metabolism	2.3.1.51	PlsC (PP_1844)	PP_1844	PlsC	0	0	1000
AGPAT181	1-octadec-7-enoyl-sn-glycerol 3-phosphate O-acyltransferase (n-C18:1)	[c] : 1odec11eg3p + octeACP --> ACP + pa181	Glycerophospholipid Metabolism	2.3.1.51	PlsC (PP_1844)	PP_1844	PlsC	0	0	1000
ALCD19	alcohol dehydrogenase (glycerol)	[c] : glyald + h + nadh <==> glyc + nad	Glycerophospholipid Metabolism	1.1.1.1				0	-1000	1000
CLPNS120pp	cardiolipin synthase (periplasmic, n-C12:0)	[p] : (2) pg120 <==> clpn120 + glyc	Glycerophospholipid Metabolism		Cls (PP_5364)	PP_5364	Cls	0	-1000	1000
CLPNS160pp	cardiolipin synthase (periplasmic, n-C16:0)	[p] : (2) pg160 <==> clpn160 + glyc	Glycerophospholipid Metabolism		Cls (PP_5364)	PP_5364	Cls	0	-1000	1000
CLPNS161pp	cardiolipin synthase (periplasmic, n-C16:1)	[p] : (2) pg161 <==> clpn161 + glyc	Glycerophospholipid Metabolism		Cls (PP_5364)	PP_5364	Cls	0	-1000	1000
CLPNS180pp	cardiolipin synthase (periplasmic, n-C18:0)	[p] : (2) pg180 <==> clpn180 + glyc	Glycerophospholipid Metabolism		Cls (PP_5364)	PP_5364	Cls	0	-1000	1000
CLPNS181pp	cardiolipin synthase (periplasmic, n-C18:1)	[p] : (2) pg181 <==> clpn181 + glyc	Glycerophospholipid Metabolism		Cls (PP_5364)	PP_5364	Cls	0	-1000	1000
DASYN120	CDP-diacylglycerol synthetase (n-C12:0)	[c] : ctp + h + pa120 --> cdpdddecg + ppi	Glycerophospholipid Metabolism	2.7.7.41	CdsA (PP_1596)	PP_1596	CdsA	0	0	1000
DASYN160	CDP-diacylglycerol synthetase (n-C16:0)	[c] : ctp + h + pa160 --> cdpdhdecg + ppi	Glycerophospholipid Metabolism	2.7.7.41	CdsA (PP_1596)	PP_1596	CdsA	0	0	1000
DASYN161	CDP-diacylglycerol synthetase (n-C16:1)	[c] : ctp + h + pa161 --> cdpdhdec9eg + ppi	Glycerophospholipid Metabolism	2.7.7.41	CdsA (PP_1596)	PP_1596	CdsA	0	0	1000
DASYN180	CDP-diacylglycerol synthetase (n-C18:0)	[c] : ctp + h + pa180 --> cdpdodecg + ppi	Glycerophospholipid Metabolism	2.7.7.41	CdsA (PP_1596)	PP_1596	CdsA	0	0	1000
DASYN181	CDP-diacylglycerol synthetase (n-C18:1)	[c] : ctp + h + pa181 --> cdpdodec11eg + ppi	Glycerophospholipid Metabolism	2.7.7.41	CdsA (PP_1596)	PP_1596	CdsA	0	0	1000
G3PAT120	glycerol-3-phosphate acyltransferase (C12:0)	[c] : ddcaACP + glyc3p --> 1ddecg3p + ACP	Glycerophospholipid Metabolism	2.3.1.15	PlsB (PP_1520)	PP_1520	PlsB	0	0	1000
G3PAT160	glycerol-3-phosphate acyltransferase (C16:0)	[c] : glyc3p + palmACP --> 1hdecg3p + ACP	Glycerophospholipid Metabolism	2.3.1.15	PlsB (PP_1520)	PP_1520	PlsB	0	0	1000
G3PAT161	glycerol-3-phosphate acyltransferase (C16:1)	[c] : glyc3p + hdeACP --> 1hdec9eg3p + ACP	Glycerophospholipid Metabolism	2.3.1.15	PlsB (PP_1520)	PP_1520	PlsB	0	0	1000
G3PAT180	glycerol-3-phosphate acyltransferase (C18:0)	[c] : glyc3p + ocdcaACP --> 1odecg3p + ACP	Glycerophospholipid Metabolism	2.3.1.15	PlsB (PP_1520)	PP_1520	PlsB	0	0	1000
G3PAT181	glycerol-3-phosphate acyltransferase (C18:1)	[c] : glyc3p + octeACP --> 1odec11eg3p + ACP	Glycerophospholipid Metabolism	2.3.1.15	PlsB (PP_1520)	PP_1520	PlsB	0	0	1000
G3PD	glycerol-3-phosphate dehydrogenase (FAD)	[c] : fad + glyc3p --> dhap + fadh2	Glycerophospholipid Metabolism	1.1.99.5	GlpD (PP_1073)	PP_1073	GlpD	0	0	1000
G3PD2	glycerol-3-phosphate dehydrogenase (NADP)	[c] : glyc3p + nadp <==> dhap + h + nadph	Glycerophospholipid Metabolism	1.1.1.94	GpsA (PP_4169)	PP_4169	GpsA	0	-1000	1000
GLYALDDr	D-Glyceraldehyde dehydrogenase	[c] : glyald + h2o + nad <==> glyc-R + (2) h + nadh	Glycerophospholipid Metabolism					0	-1000	1000
GLYALDtpp	Glyceraldehyde facilitated diffusion (periplasm)	glyald[p] <==> glyald[c]	Glycerophospholipid Metabolism		GlpF (PP_1076)	PP_1076	GlpF	0	-1000	1000
GLYCtpp	glycerol transport via channel (periplasm)	glyc[c] <==> glyc[p]	Glycerophospholipid Metabolism		GlpF (PP_1076)	PP_1076	GlpF	0	-1000	1000
GLYK	glycerol kinase	[c] : atp + glyc --> adp + glyc3p + h	Glycerophospholipid Metabolism	2.7.1.30	GlpK (PP_1075)	PP_1075	GlpK	0	0	1000
PE120abcpp	phosphatidylethanolamine transport via ABC system (n-C12:0, periplasm)	atp[c] + h2o[c] + pe120[c] --> adp[c] + h[c] + pe120[p] + pi[c]	Glycerophospholipid Metabolism		MsbA (PP_4935)	PP_4935	MsbA	0	0	1000
PE160abcpp	phosphatidylethanolamine transport via ABC system (n-C16:0, periplasm)	atp[c] + h2o[c] + pe160[c] --> adp[c] + h[c] + pe160[p] + pi[c]	Glycerophospholipid Metabolism		MsbA (PP_4935)	PP_4935	MsbA	0	0	1000
PE161abcpp	phosphatidylethanolamine transport via ABC system (n-C16:1, periplasm)	atp[c] + h2o[c] + pe161[c] --> adp[c] + h[c] + pe161[p] + pi[c]	Glycerophospholipid Metabolism		MsbA (PP_4935)	PP_4935	MsbA	0	0	1000
PE180abcpp	phosphatidylethanolamine transport via ABC system (n-C18:0, periplasm)	atp[c] + h2o[c] + pe180[c] --> adp[c] + h[c] + pe180[p] + pi[c]	Glycerophospholipid Metabolism		MsbA (PP_4935)	PP_4935	MsbA	0	0	1000
PE181abcpp	phosphatidylethanolamine transport via ABC system (n-C18:1, periplasm)	atp[c] + h2o[c] + pe181[c] --> adp[c] + h[c] + pe181[p] + pi[c]	Glycerophospholipid Metabolism		MsbA (PP_4935)	PP_4935	MsbA	0	0	1000
PGP120abcpp	phosphatidylglycerophosphate transport via ABC system (n-C12:0, periplasm)	atp[c] + h2o[c] + pgp120[c] --> adp[c] + h[c] + pgp120[p] + pi[c]	Glycerophospholipid Metabolism		MsbA (PP_4935)	PP_4935	MsbA	0	0	1000
PGP160abcpp	phosphatidylglycerophosphate transport via ABC system (n-C16:0, periplasm)	atp[c] + h2o[c] + pgp160[c] --> adp[c] + h[c] + pgp160[p] + pi[c]	Glycerophospholipid Metabolism		MsbA (PP_4935)	PP_4935	MsbA	0	0	1000
PGP161abcpp	phosphatidylglycerophosphate transport via ABC system (n-C16:1, periplasm)	atp[c] + h2o[c] + pgp161[c] --> adp[c] + h[c] + pgp161[p] + pi[c]	Glycerophospholipid Metabolism		MsbA (PP_4935)	PP_4935	MsbA	0	0	1000
PGP180abcpp	phosphatidylglycerophosphate transport via ABC system (n-C18:0, periplasm)	atp[c] + h2o[c] + pgp180[c] --> adp[c] + h[c] + pgp180[p] + pi[c]	Glycerophospholipid Metabolism		MsbA (PP_4935)	PP_4935	MsbA	0	0	1000
PGP181abcpp	phosphatidylglycerophosphate transport via ABC system (n-C18:1, periplasm)	atp[c] + h2o[c] + pgp181[c] --> adp[c] + h[c] + pgp181[p] + pi[c]	Glycerophospholipid Metabolism		MsbA (PP_4935)	PP_4935	MsbA	0	0	1000
PGPP120	phosphatidylglycerol phosphate phosphatase (n-C14:0)	[c] : h2o + pgp120 --> pg120 + pi	Glycerophospholipid Metabolism	3.1.3.27	PgpA (PP_0520)	PP_0520	PgpA	0	0	1000
PGPP120pp	phosphatidylglycerol phosphate phosphatase (periplasm, n-C14:0)	[p] : h2o + pgp120 --> pg120 + pi	Glycerophospholipid Metabolism	3.1.3.27	PgpA (PP_0520)	PP_0520	PgpA	0	0	1000
PGPP160	phosphatidylglycerol phosphate phosphatase (n-C16:0)	[c] : h2o + pgp160 --> pg160 + pi	Glycerophospholipid Metabolism	3.1.3.27	PgpA (PP_0520)	PP_0520	PgpA	0	0	1000
PGPP160pp	phosphatidylglycerol phosphate phosphatase (periplasm, n-C16:0)	[p] : h2o + pgp160 --> pg160 + pi	Glycerophospholipid Metabolism	3.1.3.27	PgpA (PP_0520)	PP_0520	PgpA	0	0	1000
PGPP161	phosphatidylglycerol phosphate phosphatase (n-C16:1)	[c] : h2o + pgp161 --> pg161 + pi	Glycerophospholipid Metabolism	3.1.3.27	PgpA (PP_0520)	PP_0520	PgpA	0	0	1000
PGPP161pp	phosphatidylglycerol phosphate phosphatase (periplasm, n-C16:1)	[p] : h2o + pgp161 --> pg161 + pi	Glycerophospholipid Metabolism	3.1.3.27	PgpA (PP_0520)	PP_0520	PgpA	0	0	1000
PGPP180	phosphatidylglycerol phosphate phosphatase (n-C18:0)	[c] : h2o + pgp180 --> pg180 + pi	Glycerophospholipid Metabolism	3.1.3.27	PgpA (PP_0520)	PP_0520	PgpA	0	0	1000
PGPP180pp	phosphatidylglycerol phosphate phosphatase (periplasm, n-C18:0)	[p] : h2o + pgp180 --> pg180 + pi	Glycerophospholipid Metabolism	3.1.3.27	PgpA (PP_0520)	PP_0520	PgpA	0	0	1000
PGPP181	phosphatidylglycerol phosphate phosphatase (n-C18:1)	[c] : h2o + pgp181 --> pg181 + pi	Glycerophospholipid Metabolism	3.1.3.27	PgpA (PP_0520)	PP_0520	PgpA	0	0	1000
PGPP181pp	phosphatidylglycerol phosphate phosphatase (periplasm, n-C18:1)	[p] : h2o + pgp181 --> pg181 + pi	Glycerophospholipid Metabolism	3.1.3.27	PgpA (PP_0520)	PP_0520	PgpA	0	0	1000
PGSA120	Phosphatidylglycerol synthase (n-C12:0)	[c] : cdpdddecg + glyc3p --> cmp + h + pgp120	Glycerophospholipid Metabolism	2.7.8.5	PgsA (PP_4097)	PP_4097	PgsA	0	0	1000
PGSA160	Phosphatidylglycerol synthase (n-C16:0)	[c] : cdpdhdecg + glyc3p --> cmp + h + pgp160	Glycerophospholipid Metabolism	2.7.8.5	PgsA (PP_4097)	PP_4097	PgsA	0	0	1000
PGSA161	Phosphatidylglycerol synthase (n-C16:1)	[c] : cdpdhdec9eg + glyc3p --> cmp + h + pgp161	Glycerophospholipid Metabolism	2.7.8.5	PgsA (PP_4097)	PP_4097	PgsA	0	0	1000
PGSA180	Phosphatidylglycerol synthase (n-C18:0)	[c] : cdpdodecg + glyc3p --> cmp + h + pgp180	Glycerophospholipid Metabolism	2.7.8.5	PgsA (PP_4097)	PP_4097	PgsA	0	0	1000
PGSA181	Phosphatidylglycerol synthase (n-C18:1)	[c] : cdpdodec11eg + glyc3p --> cmp + h + pgp181	Glycerophospholipid Metabolism	2.7.8.5	PgsA (PP_4097)	PP_4097	PgsA	0	0	1000
PSD120	Phosphatidylserine decarboxylase (n-C12:0)	[c] : h + ps120 --> co2 + pe120	Glycerophospholipid Metabolism	4.1.1.65	Psd (PP_4908)	PP_4908	Psd	0	0	1000
PSD160	Phosphatidylserine decarboxylase (n-C16:0)	[c] : h + ps160 --> co2 + pe160	Glycerophospholipid Metabolism	4.1.1.65	Psd (PP_4908)	PP_4908	Psd	0	0	1000
PSD161	Phosphatidylserine decarboxylase (n-C16:1)	[c] : h + ps161 --> co2 + pe161	Glycerophospholipid Metabolism	4.1.1.65	Psd (PP_4908)	PP_4908	Psd	0	0	1000
PSD180	Phosphatidylserine decarboxylase (n-C18:0)	[c] : h + ps180 --> co2 + pe180	Glycerophospholipid Metabolism	4.1.1.65	Psd (PP_4908)	PP_4908	Psd	0	0	1000
PSD181	Phosphatidylserine decarboxylase (n-C18:1)	[c] : h + ps181 --> co2 + pe181	Glycerophospholipid Metabolism	4.1.1.65	Psd (PP_4908)	PP_4908	Psd	0	0	1000
PSSA120	Phosphatidylserine syntase (n-C12:0)	[c] : cdpdddecg + ser-L --> cmp + h + ps120	Glycerophospholipid Metabolism	2.7.8.8	( PssA (PP_3664) ) or ( PssA1 (PP_4677) )	( PP_3664 or PP_4677 )	( PssA ) or ( PssA1 )	0	0	1000
PSSA160	Phosphatidylserine syntase (n-C16:0)	[c] : cdpdhdecg + ser-L --> cmp + h + ps160	Glycerophospholipid Metabolism	2.7.8.8	( PssA (PP_3664) ) or ( PssA1 (PP_4677) )	( PP_3664 or PP_4677 )	( PssA ) or ( PssA1 )	0	0	1000
PSSA161	Phosphatidylserine syntase (n-C16:1)	[c] : cdpdhdec9eg + ser-L --> cmp + h + ps161	Glycerophospholipid Metabolism	2.7.8.8	( PssA (PP_3664) ) or ( PssA1 (PP_4677) )	( PP_3664 or PP_4677 )	( PssA ) or ( PssA1 )	0	0	1000
PSSA180	Phosphatidylserine syntase (n-C18:0)	[c] : cdpdodecg + ser-L --> cmp + h + ps180	Glycerophospholipid Metabolism	2.7.8.8	( PssA (PP_3664) ) or ( PssA1 (PP_4677) )	( PP_3664 or PP_4677 )	( PssA ) or ( PssA1 )	0	0	1000
PSSA181	Phosphatidylserine syntase (n-C18:1)	[c] : cdpdodec11eg + ser-L --> cmp + h + ps181	Glycerophospholipid Metabolism	2.7.8.8	( PssA (PP_3664) ) or ( PssA1 (PP_4677) )	( PP_3664 or PP_4677 )	( PssA ) or ( PssA1 )	0	0	1000
THRA2r	L-allo-Threonine Aldolase	[c] : athr-L <==> acald + gly	Glycine and Serine Metabolism	4.1.2.5	LtaA (PP_0321)	PP_0321	LtaA	0	-1000	1000
BETALDHx	betaine-aldehyde dehydrogenase	[c] : betald + h2o + nad --> glyb + (2) h + nadh	Glycine, Serine and threonine metabolism	1.2.1.8	BetB (PP_5063)	PP_5063	BetB	0	0	1000
BHMT	betaine-homocysteine S-methyltransferase	[c] : glyb + hcys-L --> dmgly + met-L	Glycine, Serine and threonine metabolism	2.1.1.5				0	0	1000
CHLt2pp	choline transport via proton symport (periplasm)	chol[p] + h[p] --> chol[c] + h[c]	Glycine, Serine and threonine metabolism		BetT (PP_5061)	PP_5061	BetT	0	0	1000
CHOLD	choline dehydrogenase	[c] : chol + nad --> betald + h + nadh	Glycine, Serine and threonine metabolism	1.1.99.1	BetA (PP_5064)	PP_5064	BetA	0	0	1000
CHOLSH	choline sulphatase	[c] : chols + h2o --> chol + h + so4	Glycine, Serine and threonine metabolism		BetC (PP_0077)	PP_0077	BetC	0	0	1000
CHOLSabc	Choline sulfate ABC transporter	atp[c] + chols[p] + h2o[c] --> adp[c] + chols[c] + h[c] + pi[c]	Glycine, Serine and threonine metabolism		( BetDE ( PP_0075 and PP_0076 ) ) or ( OpuBA (PP_0868) and OpuBB ( PP_0869 ) or ( PP_0871 ) and OpuBC (PP_0870) )	( ( PP_0075 and PP_0076 ) or ( PP_0868 and ( PP_0869 or PP_0871 ) and PP_0870 ) )	( BetDE ) or ( OpuBA and OpuBB and OpuBC )	0	0	1000
DABAAT	DABA aminotransferase	[c] : 24dab + akg + (2) h <==> aspsa + glu-L	Glycine, Serine and threonine metabolism	2.6.1.76	( Dat (PP_2800) ) or ( Dat-kt1 (PP_4223) )	( PP_2800 or PP_4223 )	( Dat ) or ( Dat-kt1 )	0	-1000	1000
DMGDH	dimethylglycine dehydrogenase	[c] : dmgly + fad + h2o <==> fadh2 + fald + sarcs	Glycine, Serine and threonine metabolism	1.5.99.2				0	-1000	1000
GHMT2r	glycine hydroxymethyltransferase, reversible	[c] : ser-L + thf <==> gly + h2o + mlthf	Glycine, Serine and threonine metabolism	2.1.2.1	( GlyA (PP_0322) ) or ( GlyA2 (PP_0671) )	( PP_0322 or PP_0671 )	( GlyA ) or ( GlyA2 )	0	-1000	1000
GLYCK	glycerate kinase	[c] : atp + glyc-R --> 3pg + adp + h	Glycine, Serine and threonine metabolism	2.7.1.31	GlxK (PP_3178)	PP_3178	GlxK	0	0	1000
GLYCL	Glycine Cleavage System	[c] : gly + nad + thf --> co2 + mlthf + nadh + nh4	Glycine, Serine and threonine metabolism		( GcvH-kt1 (PP_0989) and GcvP-kt1 (PP_0988) and GcvT-kt1 (PP_0986) and Lpd (PP_4187) ) or ( GcvH-kt2 (PP_5193) and GcvP-kt2 (PP_5192) and GcvT-kt2 (PP_5194) and Lpd (PP_4187) )	( ( PP_0989 and PP_0988 and PP_0986 and PP_4187 ) or ( PP_5193 and PP_5192 and PP_5194 and PP_4187 ) )	( GcvH-kt1 and GcvP-kt1 and GcvT-kt1 and Lpd ) or ( GcvH-kt2 and GcvP-kt2 and GcvT-kt2 and Lpd )	0	0	1000
GLYD	glycerate dehydrogenase	[c] : h + hpyr + nadh <==> glyc-R + nad	Glycine, Serine and threonine metabolism	1.1.1.29	HprA (PP_0762)	PP_0762	HprA	0	-1000	1000
GLYTRS	Glycyl-tRNA synthetase	[c] : atp + gly + trnagly --> amp + glytrna + ppi	Glycine, Serine and threonine metabolism	6.1.1.14	GlyQS ( PP_0060 and PP_0061 )	( PP_0060 and PP_0061 )	GlyQS	0	0	1000
HSK	homoserine kinase	[c] : atp + hom-L --> adp + h + phom	Glycine, Serine and threonine metabolism	2.7.1.39	ThrB (PP_0121)	PP_0121	ThrB	0	0	1000
PGCDr	phosphoglycerate dehydrogenase reversible	[c] : 3pg + nad <==> 3php + h + nadh	Glycine, Serine and threonine metabolism	1.1.1.95	SerA (PP_5155)	PP_5155	SerA	0	-1000	1000
PSERTr	phosphoserine transaminase reversible	[c] : 3php + glu-L <==> akg + pser-L	Glycine, Serine and threonine metabolism	2.6.1.52	SerC (PP_1768)	PP_1768	SerC	0	-1000	1000
PSP_L	phosphoserine phosphatase (L-serine)	[c] : h2o + pser-L --> pi + ser-L	Glycine, Serine and threonine metabolism	3.1.3.3	SerB (PP_4909)	PP_4909	SerB	0	0	1000
SARCOX	sarcosine oxidase	[c] : h2o + o2 + sarcs --> fald + gly + h2o2	Glycine, Serine and threonine metabolism	1.5.3.1	SoxABDG ( PP_0323 and PP_0324 and PP_0325 and PP_0326 )	( PP_0323 and PP_0324 and PP_0325 and PP_0326 )	SoxABDG	0	0	1000
SERD_Lr	L-serine deaminase (rev)	[c] : ser-L <==> nh4 + pyr	Glycine, Serine and threonine metabolism	4.3.1.17	( Sda-kt1 (PP_0297) ) or ( Sda-kt2 (PP_0987) ) or ( Sda-kt3 (PP_3144) )	( PP_0297 or PP_0987 or PP_3144 )	( Sda-kt1 ) or ( Sda-kt2 ) or ( Sda-kt3 )	0	-1000	1000
SERTRS	Seryl-tRNA synthetase	[c] : atp + ser-L + trnaser --> amp + ppi + sertrna	Glycine, Serine and threonine metabolism	6.1.1.11	SerS (PP_4000)	PP_4000	SerS	0	0	1000
SER_AL	L-serine ammonia-lyase	[c] : ser-L <==> h + nh3 + pyr	Glycine, Serine and threonine metabolism	4.3.1.19	( IlvA-kt1 (PP_3446) ) or ( IlvA-kt2 (PP_5149) )	( PP_3446 or PP_5149 )	( IlvA-kt1 ) or ( IlvA-kt2 )	0	-1000	1000
THRAr	Threonine Aldolase	[c] : thr-L <==> acald + gly	Glycine, Serine and threonine metabolism	4.1.2.5	LtaA (PP_0321)	PP_0321	LtaA	0	-1000	1000
THRD_L	L-threonine deaminase	[c] : thr-L --> 2obut + nh4	Glycine, Serine and threonine metabolism	4.3.1.19	( IlvA-kt1 (PP_3446) ) or ( IlvA-kt2 (PP_5149) )	( PP_3446 or PP_5149 )	( IlvA-kt1 ) or ( IlvA-kt2 )	0	0	1000
THRS	threonine synthase	[c] : h2o + phom --> pi + thr-L	Glycine, Serine and threonine metabolism	4.2.3.1	ThrC (PP_1471)	PP_1471	ThrC	0	0	1000
THRTRS	Threonyl-tRNA synthetase	[c] : atp + thr-L + trnathr --> amp + ppi + thrtrna	Glycine, Serine and threonine metabolism	6.1.1.3	ThrS (PP_2465)	PP_2465	ThrS	0	0	1000
GLXCL	glyoxalate carboligase	[c] : (2) glx + h --> 2h3oppan + co2	Glycolate metabolism	4.1.1.47	Gcl (PP_4297)	PP_4297	Gcl	0	0	1000
GLYCTO1	Glycolate oxidase	[c] : glyclt + o2 --> glx + h2o2	Glycolate metabolism		( GlcD (PP_3745) and GlcE (PP_3746) and GlcF (PP_3747) )	( PP_3745 and PP_3746 and PP_3747 )	( GlcD and GlcE and GlcF )	0	0	1000
HPYRI	hydroxypyruvate isomerase	[c] : hpyr <==> 2h3oppan	Glycolate metabolism	5.3.1.22	Hyi (PP_4298)	PP_4298	Hyi	0	-1000	1000
TRSARr	tartronate semialdehyde reductase	[c] : 2h3oppan + h + nadh <==> glyc-R + nad	Glycolate metabolism	1.1.1.60	GlxR (PP_4299)	PP_4299	GlxR	0	-1000	1000
2DHGLCK	dehydrogluconokinase	[c] : 2dhglcn + atp + (2) h --> 6p2dhglcn + adp	Glycolysis	2.7.1.13	KguK (PP_3378)	PP_3378	KguK	0	0	1000
EDA	2-dehydro-3-deoxy-phosphogluconate aldolase	[c] : 2ddg6p --> g3p + pyr	Glycolysis	4.1.2.14	Eda (PP_1024)	PP_1024	Eda	0	0	1000
EDD	6-phosphogluconate dehydratase	[c] : 6pgc --> 2ddg6p + h2o	Glycolysis	4.2.1.12	Edd (PP_1010)	PP_1010	Edd	0	0	1000
FBA	fructose-bisphosphate aldolase	[c] : fdp <==> dhap + g3p	Glycolysis	4.1.2.13	Fba (PP_4960)	PP_4960	Fba	0	-1000	1000
FBP	fructose-bisphosphatase	[c] : fdp + h2o --> f6p + pi	Glycolysis	3.1.3.11	Fbp (PP_5040)	PP_5040	Fbp	0	0	1000
G6PBDH	beta-D-Glucose-6-phosphate:NADP+ 1-oxoreductase	[c] : g6p-B + nadp --> 6pgl + h + nadph	Glycolysis	1.1.1.49	G6pdh2 (PP_1022)	PP_1022	G6pdh2	0	0	1000
G6PDH2	glucose 6-phosphate dehydrogenase	[c] : g6p + nadp --> 6pgl + h + nadph	Glycolysis	1.1.1.49	G6pdh2 (PP_1022)	PP_1022	G6pdh2	0	0	1000
GADktpp	gluconate 2-dehydrogenase (periplasm)	fad[c] + glcn[p] <==> 2dhglcn[p] + fadh2[c]	Glycolysis		GadC ( PP_3382 and PP_3383 )	( PP_3382 and PP_3383 )	GadC	0	-1000	1000
GALU	UTP-glucose-1-phosphate uridylyltransferase	[c] : g1p + h + utp <==> ppi + udpg	Glycolysis	2.7.7.9	GalU (PP_3821)	PP_3821	GalU	0	-1000	1000
GLCDpp	Glucose dehydrogenase (ubiquinone-8 as acceptor) (periplasm)	glc-D[p] + h2o[p] + q8[c] --> glcn[p] + h[p] + q8h2[c]	Glycolysis		Gcd (PP_1444)	PP_1444	Gcd	0	0	1000
GLCtex	glucose transport via diffusion (extracellular to periplasm)	glc-D[e] <==> glc-D[p]	Glycolysis		( OprB-1 (PP_1019) ) or ( OprB-2 (PP_1445) )	( PP_1019 or PP_1445 )	( OprB-1 ) or ( OprB-2 )	0	-1000	1000
GNK	gluconokinase	[c] : atp + glcn --> 6pgc + adp + h	Glycolysis	2.7.1.12	Gnuk (PP_3416)	PP_3416	Gnuk	0	0	1000
HEX1	hexokinase (D-glucose:ATP)	[c] : atp + glc-D --> adp + g6p + h	Glycolysis	2.7.1.1	Glk (PP_1011)	PP_1011	Glk	0	0	1000
ME1	malic enzyme (NAD)	[c] : mal-L + nad --> co2 + nadh + pyr	Glycolysis	1.1.1.38	Mae (PP_5085)	PP_5085	Mae	0	0	1000
OAADC	oxaloacetate decarboxylase	[c] : h + oaa --> co2 + pyr	Glycolysis	4.1.1.3	OadA (PP_5346)	PP_5346	OadA	0	0	1000
PDH	pyruvate dehydrogenase	[c] : coa + nad + pyr --> accoa + co2 + nadh	Glycolysis		( AceE (PP_0339) and AceF (PP_0338) and Lpd (PP_4187) ) or ( AceE (PP_0339) and AceF (PP_0338) and Lpd-3 (PP_5366) )	( ( PP_0339 and PP_0338 and PP_4187 ) or ( PP_0339 and PP_0338 and PP_5366 ) )	( AceE and AceF and Lpd ) or ( AceE and AceF and Lpd-3 )	0	0	1000
PGI	glucose-6-phosphate isomerase	[c] : g6p <==> f6p	Glycolysis	5.3.1.9	Pgi-1 (PP_1808)	PP_1808	Pgi-1	0	-1000	1000
PGL	6-phosphogluconolactonase	[c] : 6pgl + h2o --> 6pgc + h	Glycolysis	3.1.1.31	Pgl (PP_1023)	PP_1023	Pgl	0	0	1000
PGLCNDH	phosphogluconate 2-dehydrogenase	[c] : 6p2dhglcn + nadph <==> 6pgc + (2) h + nadp	Glycolysis	1.1.1.43	KguD (PP_3376)	PP_3376	KguD	0	-1000	1000
PGMT	phosphoglucomutase	[c] : g1p <==> g6p	Glycolysis	5.4.2.2	XanA1 (PP_1777)	PP_1777	XanA1	0	-1000	1000
PPC	phosphoenolpyruvate carboxylase	[c] : co2 + h2o + pep --> h + oaa + pi	Glycolysis	4.1.1.31	Ppc (PP_1505)	PP_1505	Ppc	0	0	1000
PPS	phosphoenolpyruvate synthase	[c] : atp + h2o + pyr --> amp + (2) h + pep + pi	Glycolysis	2.7.9.2	PpsA (PP_2082)	PP_2082	PpsA	0	0	1000
ATPPRTr	ATP phosphoribosyltransferase reversible	[c] : atp + prpp <==> ppi + prbatp	Histidine Metabolism	2.4.2.17	HisG (PP_0965)	PP_0965	HisG	0	-1000	1000
FORGLUIH	N-formimino-L-glutamate inimohydrolase	[c] : forglu + (2) h + h2o --> Nforglu + nh3	Histidine Metabolism	3.5.3.13	HutF (PP_5036)	PP_5036	HutF	0	0	1000
HISD	histidase	[c] : his-L --> nh4 + urcan	Histidine Metabolism	4.3.1.3	HutH (PP_5032)	PP_5032	HutH	0	0	1000
HISTD	histidinol dehydrogenase	[c] : h2o + histd + (2) nad --> (3) h + his-L + (2) nadh	Histidine Metabolism	1.1.1.23	HisD (PP_0966)	PP_0966	HisD	0	0	1000
HISTP	histidinol-phosphatase	[c] : h2o + hisp --> histd + pi	Histidine Metabolism	3.1.3.15	HisB1 (PP_0059)	PP_0059	HisB1	0	0	1000
HISTRS	Histidyl-tRNA synthetase	[c] : atp + his-L + trnahis --> amp + histrna + ppi	Histidine Metabolism	6.1.1.21	HisS (PP_0854)	PP_0854	HisS	0	0	1000
HSTPTr	histidinol-phosphate transaminase reversible	[c] : glu-L + imacp <==> akg + hisp	Histidine Metabolism	2.6.1.9	HisC (PP_0967)	PP_0967	HisC	0	-1000	1000
IG3PS	Imidazole-glycerol-3-phosphate synthase	[c] : gln-L + prlp --> aicar + eig3p + glu-L + h	Histidine Metabolism		( HisF (PP_0293) and HisH2 (PP_0290) )	( PP_0293 and PP_0290 )	( HisF and HisH2 )	0	0	1000
IGPDH	imidazoleglycerol-phosphate dehydratase	[c] : eig3p --> h2o + imacp	Histidine Metabolism	4.2.1.19	HisB_TM (PP_0289)	PP_0289	HisB_TM	0	0	1000
IZPN	imidazolonepropionase	[c] : 4izp + h2o --> forglu + h	Histidine Metabolism	3.5.2.7	HutI (PP_5030)	PP_5030	HutI	0	0	1000
NFORGLUAH	N-Formyl-L-glutamate amidohydrolase	[c] : Nforglu + h2o --> for + glu-L + (2) h	Histidine Metabolism	3.5.1.68	HutG (PP_5029)	PP_5029	HutG	0	0	1000
PRAMPC	phosphoribosyl-AMP cyclohydrolase	[c] : h2o + prbamp --> prfp	Histidine Metabolism	3.5.4.19	HisI2 (PP_5014)	PP_5014	HisI2	0	0	1000
PRATPP	phosphoribosyl-ATP pyrophosphatase	[c] : h2o + prbatp --> h + ppi + prbamp	Histidine Metabolism	3.6.1.31	HisE (PP_5015)	PP_5015	HisE	0	0	1000
PRMICIi	1-(5-phosphoribosyl)-5-[(5-phosphoribosylamino)methylideneamino)imidazole-4-carboxamide isomerase (irreversible)	[c] : prfp --> prlp	Histidine Metabolism	5.3.1.16	HisA (PP_0292)	PP_0292	HisA	0	0	1000
URCN	urocanase	[c] : h2o + urcan --> 4izp	Histidine Metabolism	4.2.1.49	HutU (PP_5033)	PP_5033	HutU	0	0	1000
34HPPOR	4-Hydroxyphenylpyruvate:oxygen oxidoreductase	[c] : 34hpp + o2 --> co2 + hgentis	Homogentisate Pathway	1.13.11.27	Hpd.1 (PP_3433)	PP_3433	Hpd.1	0	0	1000
DHPR	6,7-dihydropteridine reductase	[c] : dhbpt + h + nadh --> nad + thbpt	Homogentisate Pathway		DhpR (PP_2432)	PP_2432	DhpR	0	0	1000
FUMAC	fumarylacetoacetase	[c] : 4fumacac + h2o --> acac + fum + h	Homogentisate Pathway	3.7.1.2	Fah.1 (PP_4620)	PP_4620	Fah.1	0	0	1000
HGNTOR	Homogentisate:oxygen 1,2-oxidoreductase (decyclizing)	[c] : hgentis + o2 --> 4mlacac + h	Homogentisate Pathway	1.13.11.5	Hgd.1 (PP_4621)	PP_4621	Hgd.1	0	0	1000
MACACI	maleylacetoacetate isomerase	[c] : 4mlacac --> 4fumacac	Homogentisate Pathway	5.2.1.2	HmgC (PP_4619)	PP_4619	HmgC	0	0	1000
PHETHPTOX	L-Phenylalanine,tetrahydrobiopterin:oxygen oxidoreductase (4-hydroxylating)	[c] : o2 + phe-L + thbpt --> dhbpt + h2o + tyr-L	Homogentisate Pathway	1.14.16.1	PhhA (PP_4490)	PP_4490	PhhA	0	0	1000
TYRTA	tyrosine transaminase	[c] : akg + tyr-L <==> 34hpp + glu-L	Homogentisate Pathway	2.6.1.5	( TyrB (PP_1972) ) or ( TyrB-2 (PP_3590) )	( PP_1972 or PP_3590 )	( TyrB ) or ( TyrB-2 )	0	-1000	1000
ASADi	aspartate-semialdehyde dehydrogenase, irreversible	[c] : 4pasp + h + nadph --> aspsa + nadp + pi	Lysine Biosynthesis	1.2.1.11	Asd (PP_1989)	PP_1989	Asd	0	0	1000
ASPKi	aspartate kinase, irreversible	[c] : asp-L + atp --> 4pasp + adp	Lysine Biosynthesis	2.7.2.4	LysC (PP_4473)	PP_4473	LysC	0	0	1000
DAPAT	Cadaverine aminotranferase	[c] : 15dap + akg --> glu-L + h + h2o + pprdn	Lysine Biosynthesis					0	0	1000
DAPDC	diaminopimelate decarboxylase	[c] : 26dap-M + h --> co2 + lys-L	Lysine Biosynthesis	4.1.1.20	( LysA-1 (PP_2077) ) or ( LysA-2 (PP_5227) )	( PP_2077 or PP_5227 )	( LysA-1 ) or ( LysA-2 )	0	0	1000
DAPE	diaminopimelate epimerase	[c] : 26dap-LL <==> 26dap-M	Lysine Biosynthesis	5.1.1.7	( DapF-1 (PP_3790) ) or ( DapF-2 (PP_5228) )	( PP_3790 or PP_5228 )	( DapF-1 ) or ( DapF-2 )	0	-1000	1000
DHDPRy	dihydrodipicolinate reductase (NADPH)	[c] : 23dhdp + h + nadph --> nadp + thdp	Lysine Biosynthesis	1.3.1.26	DapB (PP_4725)	PP_4725	DapB	0	0	1000
DHDPS	dihydrodipicolinate synthase	[c] : aspsa + pyr --> 23dhdp + h + (2) h2o	Lysine Biosynthesis	4.2.1.52	DapA (PP_1237)	PP_1237	DapA	0	0	1000
HSDx	homoserine dehydrogenase (NADH)	[c] : hom-L + nad <==> aspsa + h + nadh	Lysine Biosynthesis	1.1.1.3	Hom (PP_1470)	PP_1470	Hom	0	-1000	1000
LYSTRS	Lysyl-tRNA synthetase	[c] : atp + lys-L + trnalys --> amp + lystrna + ppi	Lysine Biosynthesis	6.1.1.6	LysS (PP_1496)	PP_1496	LysS	0	0	1000
PPRDNDH	Piperideine dehydrogenase	[c] : (2) h2o + nad + pprdn --> 5aptn + h + nadh	Lysine Biosynthesis					0	0	1000
SDPDS	succinyl-diaminopimelate desuccinylase	[c] : h2o + sl26da --> 26dap-LL + succ	Lysine Biosynthesis	3.5.1.18	DapE (PP_1525)	PP_1525	DapE	0	0	1000
SDPTA	succinyldiaminopimelate transaminase	[c] : akg + sl26da <==> glu-L + sl2a6o	Lysine Biosynthesis	2.6.1.17	DapC (PP_1588)	PP_1588	DapC	0	-1000	1000
THDPS	tetrahydrodipicolinate succinylase	[c] : h2o + succoa + thdp --> coa + sl2a6o	Lysine Biosynthesis	2.3.1.117	DapD (PP_1530)	PP_1530	DapD	0	0	1000
1PPDCRc	L-Pipecolate:NADP+ 2-oxidoreductase	[c] : 1pipdn2c + h + nadph --> Lpipecol + nadp	Lysine Metabolism	1.5.1.21	DpkA (PP_3591)	PP_3591	DpkA	0	0	1000
AADSACYCL	2-Aminoadipate 6-semialdehyde	[c] : h + h2o + thp2c <==> L2aadp6sa	Lysine Metabolism					0	-1000	1000
AASAD3	L-aminoadipate-semialdehyde dehydrogenase (NADH)	[c] : L2aadp6sa + h2o + nad --> L2aadp + (2) h + nadh	Lysine Metabolism	1.2.1.31	AmaA (PP_5258)	PP_5258	AmaA	0	0	1000
AATA	2-aminoadipate transaminase	[c] : 2oxoadp + glu-L <==> L2aadp + akg	Lysine Metabolism	2.6.1.39				0	-1000	1000
AOXHEXCYCL	6-Amino-2-oxohexanoate cyclation	[c] : 6a2ohxnt <==> 1pipdn2c + h2o	Lysine Metabolism					0	-1000	1000
APENTAMAH	5-aminopentanamide amidohydrolase	[c] : 5apentam + h2o --> 5aptn + nh3	Lysine Metabolism	3.5.1.30	DadA-1 (PP_0382)	PP_0382	DadA-1	0	0	1000
APTNAT	5-aminopentanoate:2-oxoglutarate aminotransferase	[c] : 5aptn + akg <==> glu-L + oxptn	Lysine Metabolism	2.6.1.48	DavT (PP_0214)	PP_0214	DavT	0	-1000	1000
DLYSOXGAT	D-Lysine:2-oxoglutarate aminotransferase	[c] : akg + lys-D <==> 6a2ohxnt + glu-D	Lysine Metabolism		TyrB-2 (PP_3590)	PP_3590	TyrB-2	0	-1000	1000
DLYSPYRAT	D-Lysine:pyruvate aminotransferase	[c] : lys-D + pyr <==> 6a2ohxnt + ala-D	Lysine Metabolism		TyrB-2 (PP_3590)	PP_3590	TyrB-2	0	-1000	1000
GLCOAS	glutaryl-CoA synthetase	[c] : atp + coa + glutar --> adp + glutcoa + pi	Lysine Metabolism	6.2.1.6				0	0	1000
GLCOASYNT	Glutaryl-CoA:dihydrolipoamide S-succinyltransferase	[c] : S-gtrdhdlp + coa --> dhlam + glutcoa	Lysine Metabolism	2.3.1.61	Kgd1-c (PP_4189)	PP_4189	Kgd1-c	0	0	1000
GLUTCOADHc	glutaryl-CoA dehydrogenase (citosol)	[c] : fad + glutcoa + h --> b2coa + co2 + fadh2	Lysine Metabolism	1.3.99.7	GcdH-kt (PP_0158)	PP_0158	GcdH-kt	0	0	1000
LPCOXc	L-Pipecolate:oxygen 1,6-oxidoreductase	[c] : Lpipecol + o2 --> h + h2o2 + thp2c	Lysine Metabolism	1.5.3.7	Ama (PP_5257)	PP_5257	Ama	0	0	1000
LYSDC	lysine decarboxylase	[c] : h + lys-L --> 15dap + co2	Lysine Metabolism	4.1.1.18				0	0	1000
LYSMO	lysine oxygenase	[c] : lys-L + o2 --> 5apentam + co2 + h + h2o	Lysine Metabolism	1.13.12.2	DadB (PP_0383)	PP_0383	DadB	0	0	1000
LYSRC	lysine racemase	[c] : lys-L <==> lys-D	Lysine Metabolism					0	-1000	1000
LYSabcpp	L-lysine transport via ABC system (periplasm)	atp[c] + h2o[c] + lys-L[p] --> adp[c] + h[c] + lys-L[c] + pi[c]	Lysine Metabolism		( LysT-kt2 ( PP_4483 and PP_4484 and PP_4485 and PP_4486 ) ) or ( LysT-kt1 ( PP_0280 and PP_0281 and PP_0282 and PP_0283 ) ) or ( LysT-kt3 ( PP_3593 and PP_3594 and PP_3596 and PP_3597 ) )	( ( PP_4483 and PP_4484 and PP_4485 and PP_4486 ) or ( PP_0280 and PP_0281 and PP_0282 and PP_0283 ) or ( PP_3593 and PP_3594 and PP_3596 and PP_3597 ) )	( LysT-kt2 ) or ( LysT-kt1 ) or ( LysT-kt3 )	0	0	1000
LYStex	L-lysine transport via diffusion (extracellular to periplasm)	lys-L[e] <==> lys-L[p]	Lysine Metabolism		OprD (PP_1206)	PP_1206	OprD	0	-1000	1000
ORNabcpp	ornithine transport via ABC system (periplasm)	atp[c] + h2o[c] + orn[p] --> adp[c] + h[c] + orn[c] + pi[c]	Lysine Metabolism		LysT-kt2 ( PP_4483 and PP_4484 and PP_4485 and PP_4486 )	( PP_4483 and PP_4484 and PP_4485 and PP_4486 )	LysT-kt2	0	0	1000
OXOADLR	2-Oxoadipate:lipoamde 2-oxidoreductase(decarboxylating and acceptor-succinylating)	[c] : 2oxoadp + h + lpam --> S-gtrdhdlp + co2	Lysine Metabolism	1.2.4.2	Kgd2-c (PP_4188)	PP_4188	Kgd2-c	0	0	1000
OXPTNDH	glutarate-semialdehyde:NAD+ oxidoreductase	[c] : h2o + nad + oxptn <==> glutar + (2) h + nadh	Lysine Metabolism	1.2.1.20	DavD (PP_0213)	PP_0213	DavD	0	-1000	1000
FALDDH	quinohemoprotein alcohol dehydrogenase	[c] : (2) fald + (2) focytc + o2 --> (2) cytcc + (2) for + (4) h	Methane Metabolism	1.1.99.8	QedH (PP_2674)	PP_2674	QedH	0	0	1000
FDH	formate dehydrogenase	[c] : for + nad --> co2 + nadh	Methane Metabolism	1.2.1.2	( Fdn-kt1 ( PP_0490 and PP_0491 and PP_0492 ) ) or ( Fdn-kt2 ( PP_2183 and PP_2184 and PP_2185 and PP_2186 ) )	( ( PP_0490 and PP_0491 and PP_0492 ) or ( PP_2183 and PP_2184 and PP_2185 and PP_2186 ) )	( Fdn-kt1 ) or ( Fdn-kt2 )	0	0	1000
CYSTGLr	cystathionine gamma-lyase	[c] : cyst-L + h2o <==> 2obut + cys-L + nh4	Methionine Metabolism	4.4.1.1	MetB ( PP_0659 ) or ( PP_4594 )	( PP_0659 or PP_4594 )	MetB	0	-1000	1000
CYSTL	cystathionine b-lyase	[c] : cyst-L + h2o --> hcys-L + nh4 + pyr	Methionine Metabolism	4.4.1.8				0	0	1000
DNAMTn2r	DNA (cytosine-5-)-methyltransferase	[c] : amet + dna <==> ahcys + dna5mtc + h	Methionine Metabolism	2.1.1.37	Dcm (PP_3989)	PP_3989	Dcm	0	-1000	1000
FMETTRS	Methionyl-tRNA formyltransferase	[c] : 10fthf + mettrna --> fmettrna + h + thf	Methionine Metabolism	2.1.2.9	Fmt (PP_0067)	PP_0067	Fmt	0	0	1000
HSERTA	homoserine O-trans-acetylase	[c] : accoa + hom-L <==> achms + coa	Methionine Metabolism	2.3.1.31	MetXW ( PP_5097 and PP_5098 )	( PP_5097 and PP_5098 )	MetXW	0	-1000	1000
METGL	methionine g-lyase	[c] : h2o + met-L --> 2obut + ch4s + nh4	Methionine Metabolism	4.4.1.11	MdeA (PP_1308)	PP_1308	MdeA	0	0	1000
METSr	methionine synthase reversible	[c] : 5mthf + hcys-L <==> h + met-L + thf	Methionine Metabolism	2.1.1.13	MetH (PP_2375)	PP_2375	MetH	0	-1000	1000
METTRS	Methionyl-tRNA synthetase	[c] : atp + met-L + trnamet --> amp + mettrna + ppi	Methionine Metabolism	6.1.1.10	MetG (PP_1097)	PP_1097	MetG	0	0	1000
MTHPTGHMr	5-methyltetrahydropteroyltriglutamate-homocysteine S-methyltransferase	[c] : 5mthglu + hcys-L <==> met-L + thglu	Methionine Metabolism	2.1.1.14	MetE1 (PP_2698)	PP_2698	MetE1	0	-1000	1000
SELMETAT	selenomethionine adenosyltransferase	[c] : atp + h2o + selmeth --> pi + ppi + seasmet	Methionine Metabolism	2.5.1.6	MetK (PP_4967)	PP_4967	MetK	0	0	1000
SHSL1	O-succinylhomoserine lyase (L-cysteine)	[c] : cys-L + suchms --> cyst-L + h + succ	Methionine Metabolism	4.2.99.9	MetB ( PP_0659 ) or ( PP_4594 )	( PP_0659 or PP_4594 )	MetB	0	0	1000
SHSL2r	O-succinylhomoserine lyase (H2S)	[c] : h2s + suchms <==> h + hcys-L + succ	Methionine Metabolism	4.2.99.9	MetB ( PP_0659 ) or ( PP_4594 )	( PP_0659 or PP_4594 )	MetB	0	-1000	1000
SHSL4r	O-succinylhomoserine lyase (elimination), reversible	[c] : h2o + suchms <==> 2obut + h + nh4 + succ	Methionine Metabolism	4.2.99.9	MetB ( PP_0659 ) or ( PP_4594 )	( PP_0659 or PP_4594 )	MetB	0	-1000	1000
METACH	O-Acetyl-L-homoserine acetate-lyase (adding methanethiol)	[c] : achms + h2s <==> ac + h + hcys-L	Methionine Metabolism	4.2.99.10	MetZ-kt (PP_2528)	PP_2528	MetZ-kt	0	-1000	1000
METAT	methionine adenosyltransferase	[c] : atp + h2o + met-L --> amet + pi + ppi	Methionine Metabolism	2.5.1.6	MetK (PP_4967)	PP_4967	MetK	0	0	1000
UNK3	2-keto-4-methylthiobutyrate transamination	[c] : 2kmb + glu-L --> akg + met-L	Methionine Metabolism		( TyrB (PP_1972) ) or ( TyrB-2 (PP_3590) )	( PP_1972 or PP_3590 )	( TyrB ) or ( TyrB-2 )	0	0	1000
ASPO6	L-aspartate oxidase	[c] : asp-L + o2 --> h + h2o2 + iasp	Nicotinate and Nicotinamide		NadB (PP_1426)	PP_1426	NadB	0	0	1000
NADK	NAD kinase	[c] : atp + nad --> adp + h + nadp	Nicotinate and Nicotinamide	2.7.1.23	NadK (PP_2012)	PP_2012	NadK	0	0	1000
NADS2	NAD synthase (glutamine-hydrolysing)	[c] : atp + dnad + gln-L + h2o --> amp + glu-L + h + nad + ppi	Nicotinate and Nicotinamide	6.3.5.1	NadE (PP_4869)	PP_4869	NadE	0	0	1000
NAMNPP	nicotinic acid mononucleotide pyrophosphorylase	[c] : atp + h2o + nac + prpp --> adp + nicrnt + pi + ppi	Nicotinate and Nicotinamide	2.4.2.11	PncB (PP_4868)	PP_4868	PncB	0	0	1000
NNATr	nicotinate-nucleotide adenylyltransferase	[c] : atp + h + nicrnt <==> dnad + ppi	Nicotinate and Nicotinamide	2.7.7.18	NadD (PP_4810)	PP_4810	NadD	0	-1000	1000
NNDPR	nicotinate-nucleotide diphosphorylase (carboxylating)	[c] : (2) h + prpp + quln --> co2 + nicrnt + ppi	Nicotinate and Nicotinamide	2.4.2.19	NadC (PP_0787)	PP_0787	NadC	0	0	1000
QULNS	quinolinate synthase	[c] : dhap + iasp --> (2) h2o + pi + quln	Nicotinate and Nicotinamide		NadA (PP_1231)	PP_1231	NadA	0	0	1000
THD1	NAD(P) transhydrogenase (B-specific)	[c] : nad + nadph <==> nadh + nadp	Nicotinate and Nicotinamide	1.6.1.1	SthA (PP_2151)	PP_2151	SthA	0	-1000	1000
6HNACMO	6-hydroxynicotinic acid monooxygenase	[c] : 6hnac + (2) h + nadh + o2 --> co2 + dhpyr + h2o + nad	Nicotinic acid pathway					0	0	1000
MALEI	Maleate cis-trans-isomerase	[c] : male <==> fum	Nicotinic acid pathway	5.2.1.1				0	-1000	1000
MALMDA	Maleamic acid deamidase	[c] : h2o + malm --> h + male + nh3	Nicotinic acid pathway					0	0	1000
NACHY	Nicotinic acid 6-Hydroxylase	[c] : nac + (0.5) o2 --> 6hnac	Nicotinic acid pathway					0	0	1000
NFMLDF	N-Formyl maleate deformylase	[c] : h2o + nfmalm --> for + h + malm	Nicotinic acid pathway					0	0	1000
PYRDOX	2,5-dihydroxypyridine dioxygenase.	[c] : dhpyr + o2 --> h + nfmalm	Nicotinic acid pathway					0	0	1000
DAAD	D-Amino acid dehydrogenase	[c] : ala-D + fad + h2o --> fadh2 + nh4 + pyr	Nitrogen Metabolism	1.4.99.1	( DadA-kt1 (PP_4434) ) or ( DadA-kt2 (PP_5270) )	( PP_4434 or PP_5270 )	( DadA-kt1 ) or ( DadA-kt2 )	0	0	1000
GLYCL_2	glycine cleavage system, cytosol	[c] : co2 + mlthf + nadh + nh4 --> gly + nad + thf	Nitrogen Metabolism	2.1.2.10	( GcvT-kt1 (PP_0986) ) or ( GcvT-kt2 (PP_5194) )	( PP_0986 or PP_5194 )	( GcvT-kt1 ) or ( GcvT-kt2 )	0	0	1000
H2CO3D	carboxylic acid dissociation	[c] : co2 + h2o <==> h2co3	Nitrogen Metabolism	4.2.1.1	CynT (PP_0100)	PP_0100	CynT	0	-1000	1000
NTRIR2x	nitrite Reductase (NADH)	[c] : (5) h + (3) nadh + no2 --> (2) h2o + (3) nad + nh4	Nitrogen Metabolism		NirBD ( PP_1705 and PP_1706 )	( PP_1705 and PP_1706 )	NirBD	0	0	1000
DHFR	dihydrofolate reductase	[c] : dhf + h + nadph <==> nadp + thf	One Carbon pool by folate	1.5.1.3	FolA (PP_5132)	PP_5132	FolA	0	-1000	1000
FTHFD	formyltetrahydrofolate deformylase	[c] : 10fthf + h2o --> for + h + thf	One Carbon pool by folate	3.5.1.10	( PurU-kt1 (PP_0327) ) or ( PurU-kt2 (PP_1367) ) or ( PurU-kt3 (PP_1943) )	( PP_0327 or PP_1367 or PP_1943 )	( PurU-kt1 ) or ( PurU-kt2 ) or ( PurU-kt3 )	0	0	1000
GARFT	phosphoribosylglycinamide formyltransferase	[c] : 10fthf + gar <==> fgam + h + thf	One Carbon pool by folate	2.1.2.2	PurN (PP_1664)	PP_1664	PurN	0	-1000	1000
MTHFC	methenyltetrahydrofolate cyclohydrolase	[c] : h2o + methf <==> 10fthf + h	One Carbon pool by folate	3.5.4.9	( FolD-kt1 (PP_1945) ) or ( FolD-kt2 (PP_2265) )	( PP_1945 or PP_2265 )	( FolD-kt1 ) or ( FolD-kt2 )	0	-1000	1000
MTHFD	methylenetetrahydrofolate dehydrogenase (NADP)	[c] : mlthf + nadp <==> methf + nadph	One Carbon pool by folate	1.5.1.5	( FolD-kt1 (PP_1945) ) or ( FolD-kt2 (PP_2265) )	( PP_1945 or PP_2265 )	( FolD-kt1 ) or ( FolD-kt2 )	0	-1000	1000
MTHFR3	5,10-methylenetetrahydrofolatereductase (NADPH)	[c] : (2) h + mlthf + nadph --> 5mthf + nadp	One Carbon pool by folate	1.5.1.20	MetF (PP_4977)	PP_4977	MetF	0	0	1000
CAT	catalase	[c] : (2) h2o2 --> (2) h2o + o2	Other	1.11.1.6	( KatE (PP_0115) ) or ( KatA (PP_0481) ) or ( Catpkt1 (PP_2887) )	( PP_0115 or PP_0481 or PP_2887 )	( KatE ) or ( KatA ) or ( Catpkt1 )	0	0	1000
ATPS4rpp	ATP synthase (four protons for one ATP) (periplasm)	adp[c] + (4) h[p] + pi[c] <==> atp[c] + (3) h[c] + h2o[c]	Oxidative Phosphorylation	3.6.3.14	Atp ( PP_5412 and PP_5413 and PP_5414 and PP_5415 and PP_5416 and PP_5417 and PP_5418 and PP_5419 )	( PP_5412 and PP_5413 and PP_5414 and PP_5415 and PP_5416 and PP_5417 and PP_5418 and PP_5419 )	Atp	0	-1000	1000
CYO1-KT	ubiquinol---cytochrome-c reductase	(2) ficytc[c] + (2) h[c] + q8h2[c] --> (2) focytc[c] + (2) h[p] + q8[c]	Oxidative Phosphorylation	1.10.2.2	Cbc1-m ( PP_1317 and PP_1318 and PP_1319 )	( PP_1317 and PP_1318 and PP_1319 )	Cbc1-m	0	0	1000
CYO1b	cytochrome-c oxidase (2 protons)	[c] : (2) focytc + (0.5) o2 --> (2) ficytc + h2o	Oxidative Phosphorylation	1.9.3.1	( Cbb3-1 ( PP_4250 and PP_4251 and PP_4252 and PP_4253 ) ) or ( Cbb3-2 ( PP_4255 and PP_4256 and PP_4257 and PP_4258 ) ) or ( Caa3 ( PP_0103 and PP_0104 and PP_0105 and PP_0106 ) )	( ( PP_4250 and PP_4251 and PP_4252 and PP_4253 ) or ( PP_4255 and PP_4256 and PP_4257 and PP_4258 ) or ( PP_0103 and PP_0104 and PP_0105 and PP_0106 ) )	( Cbb3-1 ) or ( Cbb3-2 ) or ( Caa3 )	0	0	1000
CYTBDpp	cytochrome oxidase bd (ubiquinol-8: 2 protons) (periplasm)	(2) h[c] + (0.5) o2[c] + q8h2[c] --> (2) h[p] + h2o[c] + q8[c]	Oxidative Phosphorylation		Cyd ( PP_4650 and PP_4651 )	( PP_4650 and PP_4651 )	Cyd	0	0	1000
CYTBO3_4pp	cytochrome oxidase bo3 (ubiquinol-8: 4 protons) (periplasm)	(4) h[c] + (0.5) o2[c] + q8h2[c] --> (4) h[p] + h2o[c] + q8[c]	Oxidative Phosphorylation		Cyo ( PP_0812 and PP_0813 and PP_0814 and PP_0815 )	( PP_0812 and PP_0813 and PP_0814 and PP_0815 )	Cyo	0	0	1000
NADH16pp	NADH dehydrogenase (ubiquinone-8 & 3 protons) (periplasm)	(4) h[c] + nadh[c] + q8[c] --> (3) h[p] + nad[c] + q8h2[c]	Oxidative Phosphorylation	1.6.5.3	NdhD ( PP_4119 and PP_4120 and PP_4121 and PP_4122 and PP_4123 and PP_4124 and PP_4125 and PP_4126 and PP_4127 and PP_4128 and PP_4129 and PP_4130 and PP_4131 )	( PP_4119 and PP_4120 and PP_4121 and PP_4122 and PP_4123 and PP_4124 and PP_4125 and PP_4126 and PP_4127 and PP_4128 and PP_4129 and PP_4130 and PP_4131 )	NdhD	0	0	1000
NADH5	NADH dehydrogenase (ubiquinone-8 )	[c] : h + nadh + q8 --> nad + q8h2	Oxidative Phosphorylation	1.6.5.3	Ndh (PP_0626)	PP_0626	Ndh	0	0	1000
PPA	inorganic diphosphatase	[c] : h2o + ppi --> h + (2) pi	Oxidative Phosphorylation	3.6.1.1	Ppa (PP_0538)	PP_0538	Ppa	0	0	1000
PPK2r	polyphosphate kinase	[c] : atp + ppi <==> adp + pppi	Oxidative Phosphorylation	2.7.4.1	Ppk (PP_5217)	PP_5217	Ppk	0	-1000	1000
ACLS	acetolactate synthase	[c] : h + (2) pyr --> alac-S + co2	Pantothenate and CoA Biosynthesis	4.1.3.18	IlvBN ( PP_4679 and PP_4680 )	( PP_4679 and PP_4680 )	IlvBN	0	0	1000
DHAD1	dihydroxy-acid dehydratase (2,3-dihydroxy-3-methylbutanoate)	[c] : 23dhmb --> 3mob + h2o	Pantothenate and CoA Biosynthesis	4.2.1.9	IlvD (PP_5128)	PP_5128	IlvD	0	0	1000
DHPM1	dihydropyrimidinase (5,6-dihydrouracil)	[c] : 56dura + h2o --> cala + h	Pantothenate and CoA Biosynthesis	3.5.2.2				0	0	1000
DPCOAK	dephospho-CoA kinase	[c] : atp + dpcoa --> adp + coa + h	Pantothenate and CoA Biosynthesis	2.7.1.24	CoaE.1 (PP_0631)	PP_0631	CoaE.1	0	0	1000
DPR	2-dehydropantoate 2-reductase	[c] : 2dhp + h + nadph --> nadp + pant-R	Pantothenate and CoA Biosynthesis	1.1.1.169	( PanE-kt1 (PP_1351) ) or ( PanE-kt2 (PP_2325) ) or ( PanE-kt3 (PP_2998) )	( PP_1351 or PP_2325 or PP_2998 )	( PanE-kt1 ) or ( PanE-kt2 ) or ( PanE-kt3 )	0	0	1000
DURAD	dihydrouracil dehydrogenase (NADP)	[c] : 56dura + nadp <==> h + nadph + ura	Pantothenate and CoA Biosynthesis	1.3.1.2	PydA-kt (PP_4038)	PP_4038	PydA-kt	0	-1000	1000
MOHMT	3-methyl-2-oxobutanoate hydroxymethyltransferase	[c] : 3mob + h2o + mlthf --> 2dhp + thf	Pantothenate and CoA Biosynthesis	2.1.2.11	PanB (PP_4699)	PP_4699	PanB	0	0	1000
PANTS	pantothenate synthase	[c] : ala-B + atp + pant-R --> amp + h + pnto-R + ppi	Pantothenate and CoA Biosynthesis	6.3.2.1	PanC (PP_4700)	PP_4700	PanC	0	0	1000
PNTK	pantothenate kinase	[c] : atp + pnto-R --> 4ppan + adp + h	Pantothenate and CoA Biosynthesis	2.7.1.33	PanK3.1 (PP_0438)	PP_0438	PanK3.1	0	0	1000
PPCDC	phosphopantothenoylcysteine decarboxylase	[c] : 4ppcys + h --> co2 + pan4p	Pantothenate and CoA Biosynthesis	4.1.1.36	CoaBC (PP_5285)	PP_5285	CoaBC	0	0	1000
PPNCL	phosphopantothenate-cysteine ligase	[c] : 4ppan + ctp + cys-L --> 4ppcys + cdp + h + pi	Pantothenate and CoA Biosynthesis	6.3.2.5	CoaBC (PP_5285)	PP_5285	CoaBC	0	0	1000
PTPAT	pantetheine-phosphate adenylyltransferase	[c] : atp + h + pan4p <==> dpcoa + ppi	Pantothenate and CoA Biosynthesis	2.7.7.3	CoaD (PP_5123)	PP_5123	CoaD	0	-1000	1000
UPPN	b-ureidopropionase	[c] : cala + (2) h + h2o --> ala-B + co2 + nh4	Pantothenate and CoA Biosynthesis	3.5.1.6	AmaB-kt (PP_0614)	PP_0614	AmaB-kt	0	0	1000
G6PI	Glucose-6-phosphate isomerase	[c] : g6p <==> g6p-B	Pentose Phosphate Pathway	5.3.1.9	Pgi-1 (PP_1808)	PP_1808	Pgi-1	0	-1000	1000
GND	phosphogluconate dehydrogenase	[c] : 6pgc + nadp --> co2 + nadph + ru5p-D	Pentose Phosphate Pathway	1.1.1.44	Gnd (PP_4043)	PP_4043	Gnd	0	0	1000
RPE	ribulose 5-phosphate 3-epimerase	[c] : ru5p-D <==> xu5p-D	Pentose Phosphate Pathway	5.1.3.1	Rpe (PP_0415)	PP_0415	Rpe	0	-1000	1000
RPI	ribose-5-phosphate isomerase	[c] : r5p <==> ru5p-D	Pentose Phosphate Pathway	5.3.1.6	RpiA (PP_5150)	PP_5150	RpiA	0	-1000	1000
TALA	transaldolase	[c] : g3p + s7p <==> e4p + f6p	Pentose Phosphate Pathway	2.2.1.2	Tal (PP_2168)	PP_2168	Tal	0	-1000	1000
TKT1	transketolase	[c] : r5p + xu5p-D <==> g3p + s7p	Pentose Phosphate Pathway	2.2.1.1	TktA (PP_4965)	PP_4965	TktA	0	-1000	1000
TKT2	transketolase	[c] : e4p + xu5p-D <==> f6p + g3p	Pentose Phosphate Pathway	2.2.1.1	TktA (PP_4965)	PP_4965	TktA	0	-1000	1000
ALAALAr	D-alanine-D-alanine ligase (reversible)	[c] : (2) ala-D + atp <==> adp + alaala + h + pi	Peptidoglycan Biosynthesis	6.3.2.4	( DdlB (PP_1339) ) or ( DdlA (PP_4346) )	( PP_1339 or PP_4346 )	( DdlB ) or ( DdlA )	0	-1000	1000
PAPPT3	phospho-N-acetylmuramoyl-pentapeptide-transferase (meso-2,6-diaminopimelate)	[c] : udcpp + ugmda --> uagmda + ump	Peptidoglycan Biosynthesis	2.7.8.13	MraY (PP_1334)	PP_1334	MraY	0	0	1000
PPTGS_KT	Peptidoglycan subunit synthesis P.putida KT2440	[c] : uaagmda --> h + peptido_kt + udcpdp	Peptidoglycan Biosynthesis					0	0	1000
UAAGDS	UDP-N-acetylmuramoyl-L-alanyl-D-glutamyl-meso-2,6-diaminopimelate synthetase	[c] : 26dap-M + atp + uamag --> adp + h + pi + ugmd	Peptidoglycan Biosynthesis	6.3.2.13	MurEkt (PP_1332)	PP_1332	MurEkt	0	0	1000
UAGPT3	UDP-N-acetylglucosamine-N-acetylmuramyl-(pentapeptide)pyrophosphoryl-undecaprenol N-acetylglucosamine transferase	[c] : uacgam + uagmda --> h + uaagmda + udp	Peptidoglycan Biosynthesis		MurG (PP_1337)	PP_1337	MurG	0	0	1000
UDCPDP	undecaprenyl-diphosphatase	[c] : h2o + udcpdp --> h + pi + udcpp	Peptidoglycan Biosynthesis	3.6.1.27	UppP (PP_2862)	PP_2862	UppP	0	0	1000
UGMDDS	UDP-N-acetylmuramoyl-L-alanyl-D-glutamyl-meso-2,6-diaminopimeloyl-D-alanyl-D-alanine synthetase	[c] : alaala + atp + ugmd --> adp + h + pi + ugmda	Peptidoglycan Biosynthesis	6.3.2.15	MurFkt (PP_1333)	PP_1333	MurFkt	0	0	1000
3HAACOAT100	3-Hydroxyacyl ACP:CoA Transacylase	[c] : 3hdecACP + coa <==> ACP + R-3hdcoa	PHAs Metabolism		PhaG (PP_1408)	PP_1408	PhaG	0	-1000	1000
3HAACOAT120	3-Hydroxyacyl ACP:CoA Transacylase	[c] : 3hddecACP + coa <==> ACP + R-3hddcoa	PHAs Metabolism		PhaG (PP_1408)	PP_1408	PhaG	0	-1000	1000
3HAACOAT121	3-Hydroxyacyl ACP:CoA Transacylase	[c] : 3hcddec5eACP + coa <==> ACP + R-3hcddec5ecoa	PHAs Metabolism		PhaG (PP_1408)	PP_1408	PhaG	0	-1000	1000
3HAACOAT140	3-Hydroxyacyl ACP:CoA Transacylase	[c] : 3hmrsACP + coa <==> ACP + R-3hmrscoa	PHAs Metabolism		PhaG (PP_1408)	PP_1408	PhaG	0	-1000	1000
3HAACOAT141	3-Hydroxyacyl ACP:CoA Transacylase	[c] : 3hcmrs7eACP + coa <==> ACP + R-3hcmrs7ecoa	PHAs Metabolism		PhaG (PP_1408)	PP_1408	PhaG	0	-1000	1000
3HAACOAT60	3-Hydroxyacyl ACP:CoA Transacylase	[c] : 3hhexACP + coa <==> ACP + R-3hhcoa	PHAs Metabolism		PhaG (PP_1408)	PP_1408	PhaG	0	-1000	1000
3HAACOAT80	3-Hydroxyacyl ACP:CoA Transacylase	[c] : 3hoctACP + coa <==> ACP + R-3hocoa	PHAs Metabolism		PhaG (PP_1408)	PP_1408	PhaG	0	-1000	1000
DPHAPC100	Poly-(3-hydroxyalkanoate) depolymerase	[c] : C100mclPHA + coa --> R-3hdcoa + mclPHAg	PHAs Metabolism		PhaZ (PP_5004)	PP_5004	PhaZ	0	0	1000
DPHAPC120	Poly-(3-hydroxyalkanoate) depolymerase	[c] : C120mclPHA + coa --> R-3hddcoa + mclPHAg	PHAs Metabolism		PhaZ (PP_5004)	PP_5004	PhaZ	0	0	1000
DPHAPC121	Poly-(3-hydroxyalkanoate) depolymerase	[c] : C121mclPHA + coa --> R-3hcddec5ecoa + mclPHAg	PHAs Metabolism		PhaZ (PP_5004)	PP_5004	PhaZ	0	0	1000
DPHAPC140	Poly-(3-hydroxyalkanoate) depolymerase	[c] : C140mclPHA + coa --> R-3hmrscoa + mclPHAg	PHAs Metabolism		PhaZ (PP_5004)	PP_5004	PhaZ	0	0	1000
DPHAPC141	Poly-(3-hydroxyalkanoate) depolymerase	[c] : C141mclPHA + coa --> R-3hcmrs7ecoa + mclPHAg	PHAs Metabolism		PhaZ (PP_5004)	PP_5004	PhaZ	0	0	1000
DPHAPC60	Poly-(3-hydroxyalkanoate) depolymerase	[c] : C60mclPHA + coa --> R-3hhcoa + mclPHAg	PHAs Metabolism		PhaZ (PP_5004)	PP_5004	PhaZ	0	0	1000
DPHAPC80	Poly-(3-hydroxyalkanoate) depolymerase	[c] : C80mclPHA + coa --> R-3hocoa + mclPHAg	PHAs Metabolism		PhaZ (PP_5004)	PP_5004	PhaZ	0	0	1000
PHA	PHA plus	[c] : C100mclPHA + C120mclPHA + C60mclPHA + C80mclPHA <==> mclPHA	PHAs Metabolism					0	-1000	1000
PHAPC100	Poly-(3-hydroxyalkanoate) polymerase	[c] : R-3hdcoa + mclPHAg --> C100mclPHA + coa	PHAs Metabolism		( PhaC1 (PP_5003) ) or ( PhaC2 (PP_5005) )	( PP_5003 or PP_5005 )	( PhaC1 ) or ( PhaC2 )	0	0	1000
PHAPC120	Poly-(3-hydroxyalkanoate) polymerase	[c] : R-3hddcoa + mclPHAg --> C120mclPHA + coa	PHAs Metabolism		( PhaC1 (PP_5003) ) or ( PhaC2 (PP_5005) )	( PP_5003 or PP_5005 )	( PhaC1 ) or ( PhaC2 )	0	0	1000
PHAPC121	Poly-(3-hydroxyalkanoate) polymerase	[c] : R-3hcddec5ecoa + mclPHAg --> C121mclPHA + coa	PHAs Metabolism		( PhaC2 (PP_5005) ) or ( PhaC1 (PP_5003) )	( PP_5005 or PP_5003 )	( PhaC2 ) or ( PhaC1 )	0	0	1000
PHAPC140	Poly-(3-hydroxyalkanoate) polymerase	[c] : R-3hmrscoa + mclPHAg --> C140mclPHA + coa	PHAs Metabolism		( PhaC1 (PP_5003) ) or ( PhaC2 (PP_5005) )	( PP_5003 or PP_5005 )	( PhaC1 ) or ( PhaC2 )	0	0	1000
PHAPC141	Poly-(3-hydroxyalkanoate) polymerase	[c] : R-3hcmrs7ecoa + mclPHAg --> C141mclPHA + coa	PHAs Metabolism		( PhaC1 (PP_5003) ) or ( PhaC2 (PP_5005) )	( PP_5003 or PP_5005 )	( PhaC1 ) or ( PhaC2 )	0	0	1000
PHAPC60	Poly-(3-hydroxyalkanoate) polymerase	[c] : R-3hhcoa + mclPHAg --> C60mclPHA + coa	PHAs Metabolism		( PhaC1 (PP_5003) ) or ( PhaC2 (PP_5005) )	( PP_5003 or PP_5005 )	( PhaC1 ) or ( PhaC2 )	0	0	1000
PHAPC80	Poly-(3-hydroxyalkanoate) polymerase	[c] : R-3hocoa + mclPHAg --> C80mclPHA + coa	PHAs Metabolism		( PhaC1 (PP_5003) ) or ( PhaC2 (PP_5005) ) or ( PhaC1 (PP_5003) )	( PP_5003 or PP_5005 or PP_5003 )	( PhaC1 ) or ( PhaC2 ) or ( PhaC1 )	0	0	1000
RHACOAR100	(3R)-3-Hydroxyacyl-CoA:NADP+ oxidoreductase	[c] : 3odcoa + h + nadph <==> R-3hdcoa + nadp	PHAs Metabolism	1.1.1.36	FabG (PP_1914)	PP_1914	FabG	0	-1000	1000
RHACOAR120	(R)-Hydroxyacyl-CoA:NADP oxidoreductase	[c] : 3oddcoa + h + nadph <==> R-3hddcoa + nadp	PHAs Metabolism	1.1.1.36	FabG (PP_1914)	PP_1914	FabG	0	-1000	1000
RHACOAR140	(3R)-3-Hydroxyacyl-CoA:NADP+ oxidoreductase	[c] : 3otdcoa + h + nadph <==> R-3hmrscoa + nadp	PHAs Metabolism	1.1.1.36	FabG (PP_1914)	PP_1914	FabG	0	-1000	1000
RHACOAR60	(3R)-3-Hydroxyacyl-CoA:NADP+ oxidoreductase	[c] : 3ohcoa + h + nadph <==> R-3hhcoa + nadp	PHAs Metabolism	1.1.1.36	FabG (PP_1914)	PP_1914	FabG	0	-1000	1000
RHACOAR80	(3R)-3-Hydroxyacyl-CoA:NADP+ oxidoreductase	[c] : 3oocoa + h + nadph <==> R-3hocoa + nadp	PHAs Metabolism	1.1.1.36	FabG (PP_1914)	PP_1914	FabG	0	-1000	1000
DHPACCOAHIT	1,2-Dihydroxy-1,2-dihydrophenylacetyl-CoA Hydratase/Isomerase/Ketothiolase complex	[c] : 2dhphaccoa + coa + (2) h2o --> 3hadpcoa + accoa + h + h2	Phenylacetyl-CoA pathway		( PaaB (PP_3283) and PaaE (PP_3280) and PaaN (PP_3270) )	( PP_3283 and PP_3280 and PP_3270 )	( PaaB and PaaE and PaaN )	0	0	1000
HADPCOADH	3-hydroxyadipyl-CoA dehydrogenase	[c] : 3hadpcoa --> h2 + oxadpcoa	Phenylacetyl-CoA pathway		( PaaA (PP_3284) and PaaC (PP_3282) )	( PP_3284 and PP_3282 )	( PaaA and PaaC )	0	0	1000
PACCOALr	phenylacetate-CoA ligase	[c] : atp + coa + pac <==> amp + phaccoa + ppi	Phenylacetyl-CoA pathway	6.2.1.30	PaaF (PP_3279)	PP_3279	PaaF	0	-1000	1000
PACt1	Phenylacetic acid transport via outer membrane porin	pac[e] <==> pac[p]	Phenylacetyl-CoA pathway		PaaM (PP_3271)	PP_3271	PaaM	0	-1000	1000
PACt3	Phenylacetic acid transport via sodium symport. MSF	na1[p] + pac[p] <==> na1[c] + pac[c]	Phenylacetyl-CoA pathway		PaaL (PP_3272)	PP_3272	PaaL	0	-1000	1000
PHACOAOR	Phenylacetyl-CoA oxygenase/reductase	[c] : h2 + o2 + phaccoa --> 2dhphaccoa	Phenylacetyl-CoA pathway		PaaGHIJK ( PP_3274 and PP_3275 and PP_3276 and PP_3277 and PP_3278 )	( PP_3274 and PP_3275 and PP_3276 and PP_3277 and PP_3278 )	PaaGHIJK	0	0	1000
ANPRT	anthranilate phosphoribosyltransferase	[c] : anth + prpp --> ppi + pran	Phenylalanine Tyrosine Tryptophan Biosynthesis	2.4.2.18	TrpD2 (PP_0421)	PP_0421	TrpD2	0	0	1000
ANS	anthranilate synthase	[c] : chor + gln-L --> anth + glu-L + h + pyr	Phenylalanine Tyrosine Tryptophan Biosynthesis	4.1.3.27	TrpEG ( PP_0417 and PP_0420 )	( PP_0417 and PP_0420 )	TrpEG	0	0	1000
CHORM	chorismate mutase	[c] : chor --> pphn	Phenylalanine Tyrosine Tryptophan Biosynthesis	5.4.99.5	PheA (PP_1769)	PP_1769	PheA	0	0	1000
CHORS	chorismate synthase	[c] : 3psme --> chor + pi	Phenylalanine Tyrosine Tryptophan Biosynthesis	4.2.3.5	AroC (PP_1830)	PP_1830	AroC	0	0	1000
DDPA	3-deoxy-D-arabino-heptulosonate 7-phosphate synthetase	[c] : e4p + h2o + pep --> 2dda7p + pi	Phenylalanine Tyrosine Tryptophan Biosynthesis	4.1.2.15	( AroF-kt1 (PP_2324) ) or ( AroF-kt2 (PP_3080) )	( PP_2324 or PP_3080 )	( AroF-kt1 ) or ( AroF-kt2 )	0	0	1000
DHQD	3-dehydroquinate dehydratase	[c] : 3dhq <==> 3dhsk + h2o	Phenylalanine Tyrosine Tryptophan Biosynthesis	4.2.1.10	( AroQ-kt1 (PP_0560) ) or ( AroQ-kt2 (PP_2407) ) or ( AroQ-kt3 (PP_3003) )	( PP_0560 or PP_2407 or PP_3003 )	( AroQ-kt1 ) or ( AroQ-kt2 ) or ( AroQ-kt3 )	0	-1000	1000
DHQS	3-dehydroquinate synthase	[c] : 2dda7p --> 3dhq + pi	Phenylalanine Tyrosine Tryptophan Biosynthesis	4.2.3.4	AroB (PP_5078)	PP_5078	AroB	0	0	1000
IGPS	indole-3-glycerol-phosphate synthase	[c] : 2cpr5p + h --> 3ig3p + co2 + h2o	Phenylalanine Tyrosine Tryptophan Biosynthesis	4.1.1.48	TrpC (PP_0422)	PP_0422	TrpC	0	0	1000
PHETA1	phenylalanine transaminase	[c] : akg + phe-L <==> glu-L + phpyr	Phenylalanine Tyrosine Tryptophan Biosynthesis	2.6.1.58	( TyrB (PP_1972) ) or ( TyrB-2 (PP_3590) )	( PP_1972 or PP_3590 )	( TyrB ) or ( TyrB-2 )	0	-1000	1000
PHETRS	Phenylalanyl-tRNA synthetase	[c] : atp + phe-L + trnaphe --> amp + phetrna + ppi	Phenylalanine Tyrosine Tryptophan Biosynthesis	6.1.1.20	PheST ( PP_2469 and PP_2470 )	( PP_2469 and PP_2470 )	PheST	0	0	1000
PPND	prephenate dehydrogenase	[c] : nad + pphn --> 34hpp + co2 + nadh	Phenylalanine Tyrosine Tryptophan Biosynthesis	1.3.1.12	TyrA (PP_1770)	PP_1770	TyrA	0	0	1000
PPNDH	prephenate dehydratase	[c] : h + pphn --> co2 + h2o + phpyr	Phenylalanine Tyrosine Tryptophan Biosynthesis	4.2.1.51	PheA (PP_1769)	PP_1769	PheA	0	0	1000
PRAI	phosphoribosylanthranilate isomerase	[c] : pran <==> 2cpr5p	Phenylalanine Tyrosine Tryptophan Biosynthesis	5.3.1.24	TrpF (PP_1995)	PP_1995	TrpF	0	-1000	1000
PSCVT	3-phosphoshikimate 1-carboxyvinyltransferase	[c] : pep + skm5p <==> 3psme + pi	Phenylalanine Tyrosine Tryptophan Biosynthesis	2.5.1.19	TyrA (PP_1770)	PP_1770	TyrA	0	-1000	1000
SHK3Dr	shikimate dehydrogenase	[c] : 3dhsk + h + nadph <==> nadp + skm	Phenylalanine Tyrosine Tryptophan Biosynthesis	1.1.1.25	( AroE-kt1 (PP_0074) ) or ( AroE-kt2 (PP_3002) )	( PP_0074 or PP_3002 )	( AroE-kt1 ) or ( AroE-kt2 )	0	-1000	1000
SHKK	shikimate kinase	[c] : atp + skm --> adp + h + skm5p	Phenylalanine Tyrosine Tryptophan Biosynthesis	2.7.1.71	AroK (PP_5079)	PP_5079	AroK	0	0	1000
TRPS1r	tryptophan synthase (indoleglycerol phosphate)	[c] : 3ig3p + ser-L <==> g3p + h2o + trp-L	Phenylalanine Tyrosine Tryptophan Biosynthesis	4.2.1.20	( TrpA-kt (PP_0082) and TrpB-kt (PP_0083) )	( PP_0082 and PP_0083 )	( TrpA-kt and TrpB-kt )	0	-1000	1000
TRPS2	tryptophan synthase (indole)	[c] : indole + ser-L --> h2o + trp-L	Phenylalanine Tyrosine Tryptophan Biosynthesis	4.2.1.20	TrpB-kt (PP_0083)	PP_0083	TrpB-kt	0	0	1000
TRPS3r	tryptophan synthase (indoleglycerol phosphate)	[c] : 3ig3p <==> g3p + indole	Phenylalanine Tyrosine Tryptophan Biosynthesis	4.2.1.20	TrpA-kt (PP_0082)	PP_0082	TrpA-kt	0	-1000	1000
TYRTRS	tyrosyl-tRNA synthetase	[c] : atp + trnatyr + tyr-L --> amp + ppi + tyrtrna	Phenylalanine Tyrosine Tryptophan Biosynthesis	6.1.1.1	TyrS (PP_0436)	PP_0436	TyrS	0	0	1000
ACBIPGT	Adenosyl cobinamide phosphate guanyltransferase	[c] : adocbip + gtp + h --> agdpcbi + ppi	Porphyrin and Chlorophyll Metabolism		CobP (PP_1678)	PP_1678	CobP	0	0	1000
ADCPS1	adenosylcobinamide-phosphate synthase	[c] : adcobhex + appl + atp --> adocbi + adp + h + pi	Porphyrin and Chlorophyll Metabolism		( CobCkt (PP_1676) and CobDkt (PP_1675) )	( PP_1676 and PP_1675 )	( CobCkt and CobDkt )	0	0	1000
ADCPS2	adenosylcobinamide-phosphate synthase	[c] : adcobhex + applp + atp --> adocbip + adp + h + pi	Porphyrin and Chlorophyll Metabolism		( CobCkt (PP_1676) and CobDkt (PP_1675) )	( PP_1676 and PP_1675 )	( CobCkt and CobDkt )	0	0	1000
ADCYRS	adenosylcobyric acid synthase (glutamine-hydrolysing)	[c] : adcobdam + (4) atp + (4) gln-L + (4) h2o --> adcobhex + (4) adp + (4) glu-L + (4) h + (4) pi	Porphyrin and Chlorophyll Metabolism		CobQ (PP_1677)	PP_1677	CobQ	0	0	1000
ADOCBIK	Adenosyl cobinamide kinase	[c] : adocbi + atp --> adocbip + adp + h	Porphyrin and Chlorophyll Metabolism		CobP (PP_1678)	PP_1678	CobP	0	0	1000
ADOCBLS	Adenosylcobalamin 5'-phosphate synthase	[c] : agdpcbi + rdmbzi --> adocbl + gmp + h	Porphyrin and Chlorophyll Metabolism		CobS (PP_1681)	PP_1681	CobS	0	0	1000
COCHL	cobaltochelatase	[c] : atp + cobalt2 + h2o + hgbam --> adp + co2dam + (2) h + pi	Porphyrin and Chlorophyll Metabolism		CobN (PP_3507)	PP_3507	CobN	0	0	1000
CPPPGO	coproporphyrinogen oxidase (O2 required)	[c] : cpppg3 + (2) h + o2 --> (2) co2 + (2) h2o + pppg9	Porphyrin and Chlorophyll Metabolism	1.3.3.3	HemF (PP_0073)	PP_0073	HemF	0	0	1000
CPPPGO2	Oxygen Independent coproporphyrinogen-III oxidase	[c] : (2) amet + cpppg3 --> (2) co2 + (2) dad-5 + (2) met-L + pppg9	Porphyrin and Chlorophyll Metabolism		HemN (PP_4264)	PP_4264	HemN	0	0	1000
CYRDAAT	cob(I)yrinic acid a,c-diamide adenosyltransferase	[c] : atp + co1dam + h --> adcobdam + pppi	Porphyrin and Chlorophyll Metabolism	2.5.1.17	CobO (PP_1672)	PP_1672	CobO	0	0	1000
CYRDAR	cob(II)yrinic acid a,c-diamide reductase	[c] : (2) co2dam + nadh --> (2) co1dam + h + nad	Porphyrin and Chlorophyll Metabolism		BluB (PP_1674)	PP_1674	BluB	0	0	1000
FCLT	Ferrochelatase	[c] : fe2 + ppp9 --> (2) h + pheme	Porphyrin and Chlorophyll Metabolism	4.99.1.1	HemH (PP_0744)	PP_0744	HemH	0	0	1000
G1SATi	glutamate-1-semialdehyde aminotransferase	[c] : glu1sa --> 5aop	Porphyrin and Chlorophyll Metabolism	5.4.3.8	HemL (PP_4784)	PP_4784	HemL	0	0	1000
GLUTRR	glutamyl-tRNA reductase	[c] : glutrna + h + nadph --> glu1sa + nadp + trnaglu	Porphyrin and Chlorophyll Metabolism		HemA (PP_0732)	PP_0732	HemA	0	0	1000
HEMEOS	Heme O synthase	[c] : frdp + h2o + pheme --> hemeO + ppi	Porphyrin and Chlorophyll Metabolism		( CyoE-kt1 (PP_0110) ) or ( CyoE-kt2 (PP_0816) )	( PP_0110 or PP_0816 )	( CyoE-kt1 ) or ( CyoE-kt2 )	0	0	1000
HMBS	hydroxymethylbilane synthase	[c] : h2o + (4) ppbng --> hmbil + (4) nh4	Porphyrin and Chlorophyll Metabolism	4.3.1.8	HemC (PP_0186)	PP_0186	HemC	0	0	1000
PC11M	precorrin-4 C11-methyltransferase	[c] : amet + pre4 --> ahcys + h + pre5	Porphyrin and Chlorophyll Metabolism	2.1.1.133	CobM (PP_3410)	PP_3410	CobM	0	0	1000
PC17M	precorrin-3B C17-methyltransferase	[c] : amet + pre3b --> ahcys + (3) h + pre4	Porphyrin and Chlorophyll Metabolism	2.1.1.131	CobJ (PP_4826)	PP_4826	CobJ	0	0	1000
PC20M	precorrin-2 C20-methyltransferase	[c] : amet + dscl --> ahcys + h + pre3a	Porphyrin and Chlorophyll Metabolism	2.1.1.130	CobI (PP_4827)	PP_4827	CobI	0	0	1000
PC6AR	precorrin-6A reductase	[c] : h + nadph + pre6a --> nadp + pre6b	Porphyrin and Chlorophyll Metabolism	1.3.1.54	CobK (PP_4832)	PP_4832	CobK	0	0	1000
PC6YM	precorrin-6Y C5,15-methyltransferase (decarboxylating)	[c] : (2) amet + pre6b --> (2) ahcys + co2 + (2) h + pre8	Porphyrin and Chlorophyll Metabolism	2.1.1.132	CobL (PP_4830)	PP_4830	CobL	0	0	1000
PC8XM	precorrin-8X methylmutase	[c] : h + pre8 --> hgbyr	Porphyrin and Chlorophyll Metabolism	5.4.1.2	CobH (PP_4828)	PP_4828	CobH	0	0	1000
PPBNGS	porphobilinogen synthase	[c] : (2) 5aop --> h + (2) h2o + ppbng	Porphyrin and Chlorophyll Metabolism	4.2.1.24	( HemB-kt2 (PP_3322) ) or ( HemB-kt1 (PP_2913) )	( PP_3322 or PP_2913 )	( HemB-kt2 ) or ( HemB-kt1 )	0	0	1000
PPPGO	protoporphyrinogen oxidase (aerobic)	[c] : (1.5) o2 + pppg9 --> (3) h2o + ppp9	Porphyrin and Chlorophyll Metabolism	1.3.3.4				0	0	1000
R05217	Precorrin 3A + Oxygen <=> Precorrin 3B	[c] : h + (0.5) o2 + pre3a --> pre3b	Porphyrin and Chlorophyll Metabolism		CobG (PP_4829)	PP_4829	CobG	0	0	1000
R05219	Precorrin 5 <=> Precorrin 6X	[c] : amet + h2o + pre5 --> ac + ahcys + h + pre6a	Porphyrin and Chlorophyll Metabolism		CobF (PP_3763)	PP_3763	CobF	0	0	1000
R05224	Hydrogenobyrinate <=> Hydrogenobyrinate a,c diamide	[c] : (2) atp + (2) gln-L + h2o + hgbyr --> (2) adp + (2) glu-L + h + hgbam + ppi	Porphyrin and Chlorophyll Metabolism		CobB (PP_1673)	PP_1673	CobB	0	0	1000
RZ5PP	alpha-ribazole 5-phosphate phosphatase	[c] : 5prdmbz + h2o --> pi + rdmbzi	Porphyrin and Chlorophyll Metabolism		CobCkt1 (PP_1680)	PP_1680	CobCkt1	0	0	1000
SHCHD2	sirohydrochlorin dehydrogenase (NAD)	[c] : dscl + nad --> h + nadh + scl	Porphyrin and Chlorophyll Metabolism		CysG2 (PP_3999)	PP_3999	CysG2	0	0	1000
SHCHF	sirohydrochlorin ferrochetalase	[c] : fe2 + scl --> (3) h + sheme	Porphyrin and Chlorophyll Metabolism		CysG2 (PP_3999)	PP_3999	CysG2	0	0	1000
UPP3MT	uroporphyrinogen methyltransferase	[c] : (2) amet + uppg3 --> (2) ahcys + dscl + h	Porphyrin and Chlorophyll Metabolism	2.1.1.107	( CobA-kt1 (PP_2090) ) or ( CysG2 (PP_3999) )	( PP_2090 or PP_3999 )	( CobA-kt1 ) or ( CysG2 )	0	0	1000
UPP3S	uroporphyrinogen-III synthase	[c] : hmbil --> h2o + uppg3	Porphyrin and Chlorophyll Metabolism	4.2.1.75	HemD (PP_0187)	PP_0187	HemD	0	0	1000
UPPDC1	uroporphyrinogen decarboxylase (uroporphyrinogen III)	[c] : (4) h + uppg3 --> (4) co2 + cpppg3	Porphyrin and Chlorophyll Metabolism	4.1.1.37	HemE (PP_5074)	PP_5074	HemE	0	0	1000
UPPDC2	uroporphyrinogen decarboxylase (uroporphyrinogen I)	[c] : (4) h + uppg1 --> (4) co2 + cpppg1	Porphyrin and Chlorophyll Metabolism	4.1.1.37	HemE (PP_5074)	PP_5074	HemE	0	0	1000
ACS2	acetyl-CoA synthase (propionate)	[c] : atp + coa + ppa --> amp + ppcoa + ppi	Propanoate Metabolism	6.2.1.1	PrpE (PP_2351)	PP_2351	PrpE	0	0	1000
MCITD	2-methylcitrate dehydratase	[c] : 2mcit --> 2mcacn + h2o	Propanoate Metabolism	4.2.1.79	PrpD (PP_2338)	PP_2338	PrpD	0	0	1000
MCITL2	methylisocitrate lyase	[c] : micit <==> pyr + succ	Propanoate Metabolism	4.1.3.30	PrpB (PP_2334)	PP_2334	PrpB	0	-1000	1000
MCITS	2-methylcitrate synthase	[c] : h2o + oaa + ppcoa --> 2mcit + coa + h	Propanoate Metabolism	4.1.3.31	PrpC (PP_2335)	PP_2335	PrpC	0	0	1000
MICITDr	2-methylisocitrate dehydratase	[c] : 2mcacn + h2o <==> micit	Propanoate Metabolism	4.2.1.99	AcnM (PP_2336)	PP_2336	AcnM	0	-1000	1000
OBDHc	2-Oxobutanoate dehydrogenase, cytosolic	[c] : 2obut + coa + nad --> co2 + nadh + ppcoa	Propanoate Metabolism	1.2.7.2				0	0	1000
ADA	Adenosine deaminase	[c] : adn + h + h2o --> ins + nh4	Purine Metabolism	3.5.4.4	Add (PP_0591)	PP_0591	Add	0	0	1000
ADK1	adenylate kinase	[c] : amp + atp <==> (2) adp	Purine Metabolism	2.7.4.3	Adk (PP_1506)	PP_1506	Adk	0	-1000	1000
ADNCYC	adenylate cyclase	[c] : atp --> camp + ppi	Purine Metabolism	4.6.1.1	CyaA (PP_5222)	PP_5222	CyaA	0	0	1000
ADPT	adenine phosphoribosyltransferase	[c] : ade + prpp --> amp + ppi	Purine Metabolism	2.4.2.7	Apt (PP_4266)	PP_4266	Apt	0	0	1000
ADPT2	adenine phosphoribosyltransferase	[c] : aicar + ppi <==> C04051 + prpp	Purine Metabolism	2.4.2.7	Apt (PP_4266)	PP_4266	Apt	0	-1000	1000
ADSL1r	adenylsuccinate lyase	[c] : dcamp <==> amp + fum	Purine Metabolism	4.3.2.2	PurB (PP_4016)	PP_4016	PurB	0	-1000	1000
ADSL2r	adenylosuccinate lyase	[c] : 25aics <==> aicar + fum	Purine Metabolism	4.3.2.2	PurB (PP_4016)	PP_4016	PurB	0	-1000	1000
ADSS	adenylosuccinate synthase	[c] : asp-L + gtp + imp --> dcamp + gdp + (2) h + pi	Purine Metabolism	6.3.4.4	PurA (PP_4889)	PP_4889	PurA	0	0	1000
AICART	phosphoribosylaminoimidazolecarboxamide formyltransferase	[c] : 10fthf + aicar <==> fprica + thf	Purine Metabolism	2.1.2.3	PurH (PP_4822)	PP_4822	PurH	0	-1000	1000
AIRCr	phosphoribosylaminoimidazole carboxylase	[c] : air + co2 <==> 5aizc + h	Purine Metabolism	4.1.1.21	PurEK ( PP_5335 and PP_5336 )	( PP_5335 and PP_5336 )	PurEK	0	-1000	1000
AMPN	AMP nucleosidase	[c] : amp + h2o --> ade + r5p	Purine Metabolism	3.2.2.4	Amn (PP_4779)	PP_4779	Amn	0	0	1000
AP4AH	Ap4A hydrolase	[c] : ap4a + h2o --> (2) adp + (2) h	Purine Metabolism	3.6.1.41	ApaH (PP_0399)	PP_0399	ApaH	0	0	1000
DADA	Deoxyadenosine deaminase	[c] : dad-2 + h + h2o --> din + nh4	Purine Metabolism		Add (PP_0591)	PP_0591	Add	0	0	1000
DADK	deoxyadenylate kinase	[c] : atp + damp <==> adp + dadp	Purine Metabolism	2.7.4.11	Adk (PP_1506)	PP_1506	Adk	0	-1000	1000
DGK1	deoxyguanylate kinase (dGMP:ATP)	[c] : atp + dgmp <==> adp + dgdp	Purine Metabolism	2.7.4.8	Gmk2 (PP_5296)	PP_5296	Gmk2	0	-1000	1000
GART	GAR transformylase-T	[c] : atp + for + gar --> adp + fgam + h + pi	Purine Metabolism		PurT (PP_1457)	PP_1457	PurT	0	0	1000
GDPT	Guanosine 3'-diphosphate 5'-triphosphate	[c] : gdptp + h2o <==> h + pi + ppgpp	Purine Metabolism	3.6.1.11	Ppx (PP_5216)	PP_5216	Ppx	0	-1000	1000
GK1	guanylate kinase (GMP:ATP)	[c] : atp + gmp <==> adp + gdp	Purine Metabolism	2.7.4.8	Gmk2 (PP_5296)	PP_5296	Gmk2	0	-1000	1000
GLUPRT	glutamine phosphoribosyldiphosphate amidotransferase	[c] : gln-L + h2o + prpp --> glu-L + ppi + pram	Purine metabolism	2.4.2.14	PurF (PP_2000)	PP_2000	PurF	0	0	1000
GMPS2	GMP synthase	[c] : atp + gln-L + h2o + xmp --> amp + glu-L + gmp + (2) h + ppi	Purine Metabolism	6.3.5.2	GuaA (PP_1032)	PP_1032	GuaA	0	0	1000
GNNUC	gnnuc	[c] : gsn + h2o --> gua + rib-D	Purine Metabolism		IunH2 (PP_2460)	PP_2460	IunH2	0	0	1000
GTPDPK	GTP diphosphokinase	[c] : atp + gtp --> amp + gdptp + h	Purine Metabolism	2.7.6.5	RelA (PP_1656)	PP_1656	RelA	0	0	1000
GUAD	guanine deaminase	[c] : gua + h + h2o --> nh4 + xan	Purine Metabolism	3.5.4.3	GuaD (PP_4281)	PP_4281	GuaD	0	0	1000
GUAPRT	guanine phosphoribosyltransferase	[c] : gua + prpp --> gmp + ppi	Purine Metabolism	2.4.2.8	Hpt (PP_0747)	PP_0747	Hpt	0	0	1000
HXAND	hypoxanthine dehydrogenase	[c] : h2o + hxan + nad --> h + nadh + xan	Purine Metabolism		XdhAB ( PP_4278 and PP_4279 )	( PP_4278 and PP_4279 )	XdhAB	0	0	1000
HXPRT	hypoxanthine phosphoribosyltransferase (Hypoxanthine)	[c] : hxan + prpp --> imp + ppi	Purine Metabolism	2.4.2.8	Hpt (PP_0747)	PP_0747	Hpt	0	0	1000
IMPC	IMP cyclohydrolase	[c] : h2o + imp <==> fprica	Purine Metabolism	3.5.4.10	PurH (PP_4822)	PP_4822	PurH	0	-1000	1000
IMPD	IMP dehydrogenase	[c] : h2o + imp + nad --> h + nadh + xmp	Purine Metabolism	1.1.1.205	GuaB (PP_1031)	PP_1031	GuaB	0	0	1000
INSH	Inosine hydrolase	[c] : h2o + ins --> hxan + rib-D	Purine Metabolism	3.2.2.8	IunH2 (PP_2460)	PP_2460	IunH2	0	0	1000
NDPK1	nucleoside-diphosphate kinase (ATP:GDP)	[c] : atp + gdp <==> adp + gtp	Purine Metabolism	2.7.4.6	Ndk (PP_0849)	PP_0849	Ndk	0	-1000	1000
NDPK5	nucleoside-diphosphate kinase (ATP:dGDP)	[c] : atp + dgdp <==> adp + dgtp	Purine Metabolism	2.7.4.6	Ndk (PP_0849)	PP_0849	Ndk	0	-1000	1000
NDPK8	nucleoside-diphosphate kinase (ATP:dADP)	[c] : atp + dadp <==> adp + datp	Purine Metabolism	2.7.4.6	Ndk (PP_0849)	PP_0849	Ndk	0	-1000	1000
NTD10	5'-nucleotidase (XMP)	[c] : h2o + xmp --> pi + xtsn	Purine Metabolism	3.1.3.5	SurE (PP_1620)	PP_1620	SurE	0	0	1000
NTD10pp	5'-nucleotidase (XMP)	[p] : h2o + xmp --> pi + xtsn	Purine Metabolism	3.1.3.5	UshA (PP_1414)	PP_1414	UshA	0	0	1000
NTD11	5'-nucleotidase (IMP)	[c] : h2o + imp --> ins + pi	Purine Metabolism	3.1.3.5	SurE (PP_1620)	PP_1620	SurE	0	0	1000
NTD11pp	5'-nucleotidase (IMP)	[p] : h2o + imp --> ins + pi	Purine Metabolism	3.1.3.5	UshA (PP_1414)	PP_1414	UshA	0	0	1000
NTD6	5'-nucleotidase (dAMP)	[c] : damp + h2o --> dad-2 + pi	Purine Metabolism	3.1.3.5	SurE (PP_1620)	PP_1620	SurE	0	0	1000
NTD6pp	5'-nucleotidase (dAMP)	[p] : damp + h2o --> dad-2 + pi	Purine Metabolism	3.1.3.5	UshA (PP_1414)	PP_1414	UshA	0	0	1000
NTD7	5'-nucleotidase (AMP)	[c] : amp + h2o --> adn + pi	Purine Metabolism	3.1.3.5	SurE (PP_1620)	PP_1620	SurE	0	0	1000
NTD7pp	5'-nucleotidase (AMP)	[p] : amp + h2o --> adn + pi	Purine Metabolism	3.1.3.5	UshA (PP_1414)	PP_1414	UshA	0	0	1000
NTD8	5'-nucleotidase (dGMP)	[c] : dgmp + h2o --> dgsn + pi	Purine Metabolism	3.1.3.5	SurE (PP_1620)	PP_1620	SurE	0	0	1000
NTD8pp	5'-nucleotidase (dGMP)	[p] : dgmp + h2o --> dgsn + pi	Purine Metabolism	3.1.3.5	UshA (PP_1414)	PP_1414	UshA	0	0	1000
NTD9	5'-nucleotidase (GMP)	[c] : gmp + h2o --> gsn + pi	Purine Metabolism	3.1.3.5	SurE (PP_1620)	PP_1620	SurE	0	0	1000
NTD9pp	5'-nucleotidase (GMP)	[p] : gmp + h2o --> gsn + pi	Purine Metabolism	3.1.3.5	UshA (PP_1414)	PP_1414	UshA	0	0	1000
PPGPPDP	guanosine-3',5'-bis(diphosphate) 3'-diphosphatase	[c] : h2o + ppgpp --> gdp + ppi	Purine Metabolism	3.1.7.2	SpoT (PP_5302)	PP_5302	SpoT	0	0	1000
PRAGS	phosphoribosylglycinamide synthetase	[c] : atp + gly + pram --> adp + gar + h + pi	Purine Metabolism	6.3.4.13	PurD (PP_4823)	PP_4823	PurD	0	0	1000
PRAIS	phosphoribosylaminoimidazole synthase	[c] : atp + fpram --> adp + air + (2) h + pi	Purine Metabolism	6.3.3.1	PurM (PP_1665)	PP_1665	PurM	0	0	1000
PRASCS	phosphoribosylaminoimidazolesuccinocarboxamide synthase	[c] : 5aizc + asp-L + atp <==> 25aics + adp + h + pi	Purine Metabolism	6.3.2.6	PurC (PP_1240)	PP_1240	PurC	0	-1000	1000
PRFGS	phosphoribosylformylglycinamidine synthase	[c] : atp + fgam + gln-L + h2o --> adp + fpram + glu-L + h + pi	Purine Metabolism	6.3.5.3	PurL (PP_1037)	PP_1037	PurL	0	0	1000
RNDR1	ribonucleoside-diphosphate reductase (ADP)	[c] : adp + trdrd --> dadp + h2o + trdox	Purine Metabolism	1.17.4.1	NrdAB ( PP_1177 and PP_1179 )	( PP_1177 and PP_1179 )	NrdAB	0	0	1000
RNDR2	ribonucleoside-diphosphate reductase (GDP)	[c] : gdp + trdrd --> dgdp + h2o + trdox	Purine Metabolism	1.17.4.1	NrdAB ( PP_1177 and PP_1179 )	( PP_1177 and PP_1179 )	NrdAB	0	0	1000
XAND	xanthine dehydrogenase	[c] : h2o + nad + xan --> h + nadh + urate	Purine Metabolism	1.1.1.204	XdhAB ( PP_4278 and PP_4279 )	( PP_4278 and PP_4279 )	XdhAB	0	0	1000
XTSNH	Xanthosine hydrolase	[c] : h2o + xtsn --> rib-D + xan	Purine Metabolism	3.2.2.8	IunH2 (PP_2460)	PP_2460	IunH2	0	0	1000
ASPCT	aspartate carbamoyltransferase	[c] : asp-L + cbp --> cbasp + h + pi	Pyrimidine Metabolism	2.1.3.2	PyrBec (PP_4998)	PP_4998	PyrBec	0	0	1000
CBPS	carbamoyl-phosphate synthase (glutamine-hydrolysing)	[c] : (2) atp + gln-L + h2o + hco3 --> (2) adp + cbp + glu-L + (2) h + pi	Pyrimidine Metabolism	6.3.5.5	CarB ( PP_4723 and PP_4724 )	( PP_4723 and PP_4724 )	CarB	0	0	1000
CSND	Cytosine deaminase	[c] : csn + h + h2o --> nh4 + ura	Pyrimidine Metabolism	3.5.4.1	CodA (PP_3189)	PP_3189	CodA	0	0	1000
CTPS2	CTP synthase (glutamine)	[c] : atp + gln-L + h2o + utp --> adp + ctp + glu-L + (2) h + pi	Pyrimidine Metabolism	6.3.4.2	PyrG (PP_1610)	PP_1610	PyrG	0	0	1000
CYTK1	cytidylate kinase (CMP)	[c] : atp + cmp <==> adp + cdp	Pyrimidine Metabolism	2.7.4.14	Cmk (PP_1771)	PP_1771	Cmk	0	-1000	1000
CYTK2	cytidylate kinase (dCMP)	[c] : atp + dcmp <==> adp + dcdp	Pyrimidine Metabolism	2.7.4.14	Cmk (PP_1771)	PP_1771	Cmk	0	-1000	1000
DCTPD	dCTP deaminase	[c] : dctp + h + h2o --> dutp + nh4	Pyrimidine Metabolism	3.5.4.13	Dcd (PP_1100)	PP_1100	Dcd	0	0	1000
DCTPD2	dCTP deaminase	[c] : ctp + h + h2o --> nh4 + utp	Pyrimidine Metabolism	3.5.4.13	Dcd (PP_1100)	PP_1100	Dcd	0	0	1000
DHORD	dihydoorotic acid dehydrogenase	[c] : dhor-S + o2 <==> h2o2 + orot	Pyrimidine Metabolism	1.3.3.1	PyrD (PP_2095)	PP_2095	PyrD	0	-1000	1000
DHORTS	dihydroorotase	[c] : dhor-S + h2o <==> cbasp + h	Pyrimidine Metabolism	3.5.2.3	PyrC (PP_1086)	PP_1086	PyrC	0	-1000	1000
DTMPK	dTMP kinase	[c] : atp + dtmp <==> adp + dtdp	Pyrimidine Metabolism	2.7.4.9	Tmk (PP_3363)	PP_3363	Tmk	0	-1000	1000
DUTPDP	dUTP diphosphatase	[c] : dutp + h2o --> dump + h + ppi	Pyrimidine Metabolism	3.6.1.23	Dut (PP_5286)	PP_5286	Dut	0	0	1000
NDPK2	nucleoside-diphosphate kinase (ATP:UDP)	[c] : atp + udp <==> adp + utp	Pyrimidine Metabolism	2.7.4.6	( Ndk (PP_0849) ) or ( Ndk (PP_0849) )	( PP_0849 and PP_0849 )	( Ndk ) or ( Ndk )	0	-1000	1000
NDPK3	nucleoside-diphosphate kinase (ATP:CDP)	[c] : atp + cdp <==> adp + ctp	Pyrimidine Metabolism	2.7.4.6	( Ndk (PP_0849) ) or ( Ndk (PP_0849) )	( PP_0849 and PP_0849 )	( Ndk ) or ( Ndk )	0	-1000	1000
NDPK4	nucleoside-diphosphate kinase (ATP:dTDP)	[c] : atp + dtdp <==> adp + dttp	Pyrimidine Metabolism	2.7.4.6	Ndk (PP_0849)	PP_0849	Ndk	0	-1000	1000
NDPK6	nucleoside-diphosphate kinase (ATP:dUDP)	[c] : atp + dudp <==> adp + dutp	Pyrimidine Metabolism	2.7.4.6	Ndk (PP_0849)	PP_0849	Ndk	0	-1000	1000
NDPK7	nucleoside-diphosphate kinase (ATP:dCDP)	[c] : atp + dcdp <==> adp + dctp	Pyrimidine Metabolism	2.7.4.6	Ndk (PP_0849)	PP_0849	Ndk	0	-1000	1000
NTD2	5'-nucleotidase (UMP)	[c] : h2o + ump --> pi + uri	Pyrimidine Metabolism	3.1.3.5	SurE (PP_1620)	PP_1620	SurE	0	0	1000
NTD2pp	5'-nucleotidase (UMP)	[p] : h2o + ump --> pi + uri	Pyrimidine Metabolism	3.1.3.5	UshA (PP_1414)	PP_1414	UshA	0	0	1000
NTD3	5'-nucleotidase (dCMP)	[c] : dcmp + h2o --> dcyt + pi	Pyrimidine Metabolism	3.1.3.5	SurE (PP_1620)	PP_1620	SurE	0	0	1000
NTD3pp	5'-nucleotidase (dCMP)	[p] : dcmp + h2o --> dcyt + pi	Pyrimidine Metabolism	3.1.3.5	UshA (PP_1414)	PP_1414	UshA	0	0	1000
NTD4	5'-nucleotidase (CMP)	[c] : cmp + h2o --> cytd + pi	Pyrimidine Metabolism	3.1.3.5	SurE (PP_1620)	PP_1620	SurE	0	0	1000
NTD4pp	5'-nucleotidase (CMP)	[p] : cmp + h2o --> cytd + pi	Pyrimidine Metabolism	3.1.3.5	UshA (PP_1414)	PP_1414	UshA	0	0	1000
NTD5	5'-nucleotidase (dTMP)	[c] : dtmp + h2o --> pi + thymd	Pyrimidine Metabolism	3.1.3.5	SurE (PP_1620)	PP_1620	SurE	0	0	1000
NTD5pp	5'-nucleotidase (dTMP)	[p] : dtmp + h2o --> pi + thymd	Pyrimidine Metabolism	3.1.3.5	UshA (PP_1414)	PP_1414	UshA	0	0	1000
OMPDC	orotidine-5'-phosphate decarboxylase	[c] : h + orot5p --> co2 + ump	Pyrimidine Metabolism	4.1.1.23	PyrF (PP_1815)	PP_1815	PyrF	0	0	1000
ORPT	orotate phosphoribosyltransferase	[c] : orot5p + ppi <==> orot + prpp	Pyrimidine Metabolism	2.4.2.10	PyrE (PP_5291)	PP_5291	PyrE	0	-1000	1000
PYNP2r	pyrimidine-nucleoside phosphorylase (uracil)	[c] : pi + uri <==> r1p + ura	Pyrimidine Metabolism	2.4.2.2				0	-1000	1000
RNDR3	ribonucleoside-diphosphate reductase (CDP)	[c] : cdp + trdrd --> dcdp + h2o + trdox	Pyrimidine Metabolism	1.17.4.1	NrdAB ( PP_1177 and PP_1179 )	( PP_1177 and PP_1179 )	NrdAB	0	0	1000
RNDR4	ribonucleoside-diphosphate reductase (UDP)	[c] : trdrd + udp --> dudp + h2o + trdox	Pyrimidine Metabolism	1.17.4.1	NrdAB ( PP_1177 and PP_1179 )	( PP_1177 and PP_1179 )	NrdAB	0	0	1000
TMDS	thymidylate synthase	[c] : dump + mlthf --> dhf + dtmp	Pyrimidine Metabolism	2.1.1.45	ThyA (PP_5141)	PP_5141	ThyA	0	0	1000
TRDR	thioredoxin reductase (NADPH)	[c] : h + nadph + trdox --> nadp + trdrd	Pyrimidine Metabolism	1.8.1.9	( TrxB (PP_0786) ) or ( TrxC (PP_5069) )	( PP_0786 or PP_5069 )	( TrxB ) or ( TrxC )	0	0	1000
UMPK	UMP kinase	[c] : atp + ump <==> adp + udp	Pyrimidine Metabolism	2.7.4.14	( Cmk (PP_1771) ) or ( PyrH (PP_1593) )	( PP_1771 or PP_1593 )	( Cmk ) or ( PyrH )	0	-1000	1000
UPPRT	uracil phosphoribosyltransferase	[c] : prpp + ura --> ppi + ump	Pyrimidine Metabolism	2.4.2.9	Upp (PP_0746)	PP_0746	Upp	0	0	1000
L-LACD2	L-Lactate dehydrogenase (ubiquinone)	[c] : lac-L + q8 --> pyr + q8h2	Pyruvate Met	1.1.2.3	IldD1 (PP_4736)	PP_4736	IldD1	0	0	1000
LDH_D	D-lactate dehydrogenase	[c] : lac-D + nad <==> h + nadh + pyr	Pyruvate Met	1.1.1.28	Ldh (PP_1649)	PP_1649	Ldh	0	-1000	1000
APRAUR	5-amino-6-(5-phosphoribosylamino)uracil reductase	[c] : 5apru + h + nadph --> 5aprbu + nadp	Riboflavin Metabolism	1.1.1.193	RibD (PP_0514)	PP_0514	RibD	0	0	1000
DB4PS	3,4-Dihydroxy-2-butanone-4-phosphate synthase	[c] : ru5p-D --> db4p + for + h	Riboflavin Metabolism		( RibB1 (PP_0530) ) or ( RibBAkt1 (PP_0516) ) or ( RibBAkt2 (PP_3813) )	( PP_0530 or PP_0516 or PP_3813 )	( RibB1 ) or ( RibBAkt1 ) or ( RibBAkt2 )	0	0	1000
DHPPDA	diaminohydroxyphosphoribosylaminopyrimidine deaminase	[c] : 25dhpp + h + h2o --> 5apru + nh4	Riboflavin Metabolism	3.5.4.26	RibD (PP_0514)	PP_0514	RibD	0	0	1000
FMNAT	FMN adenylyltransferase	[c] : atp + fmn + h --> fad + ppi	Riboflavin Metabolism	2.7.7.2	RibFkt (PP_0602)	PP_0602	RibFkt	0	0	1000
GTPCII	GTP cyclohydrolase II	[c] : gtp + (3) h2o --> 25dhpp + for + (2) h + ppi	Riboflavin Metabolism	3.5.4.25	( RibA (PP_0522) ) or ( RibBAkt1 (PP_0516) ) or ( RibBAkt2 (PP_3813) )	( PP_0522 or PP_0516 or PP_3813 )	( RibA ) or ( RibBAkt1 ) or ( RibBAkt2 )	0	0	1000
PMDPHT	pyrimidine phosphatase	[c] : 5aprbu + h2o --> 4r5au + pi	Riboflavin Metabolism		AceK-kt (PP_4565)	PP_4565	AceK-kt	0	0	1000
RBFK	riboflavin kinase	[c] : atp + ribflv --> adp + fmn + h	Riboflavin Metabolism	2.7.1.26	RibFkt (PP_0602)	PP_0602	RibFkt	0	0	1000
RBFSa	riboflavin synthase	[c] : 4r5au + db4p --> dmlz + (2) h2o + pi	Riboflavin Metabolism	2.5.1.9	RibH1 (PP_0517)	PP_0517	RibH1	0	0	1000
RBFSb	riboflavin synthase	[c] : (2) dmlz --> 4r5au + ribflv	Riboflavin Metabolism	2.5.1.9	RibE-kt (PP_0515)	PP_0515	RibE-kt	0	0	1000
PPM	phosphopentomutase	[c] : r1p <==> r5p	Ribose Metabolism	5.4.2.7	XanA1 (PP_1777)	PP_1777	XanA1	0	-1000	1000
PRPPS	phosphoribosylpyrophosphate synthetase	[c] : atp + r5p <==> amp + h + prpp	Ribose Metabolism	2.7.6.1	PrsA (PP_0722)	PP_0722	PrsA	0	-1000	1000
R15BPK	ribose-1,5-bisphosphokinase	[c] : atp + r15bp --> adp + prpp	Ribose Metabolism		PhnN (PP_4469)	PP_4469	PhnN	0	0	1000
R1PK	ribose 1-phosphokinase	[c] : atp + r1p --> adp + h + r15bp	Ribose Metabolism					0	0	1000
CDPMEK	4-(cytidine 5'-diphospho)-2-C-methyl-D-erythritol kinase	[c] : 4c2me + atp --> 2p4c2me + adp + h	Steroid biosynthesis		IspE (PP_0723)	PP_0723	IspE	0	0	1000
DMATT	dimethylallyltranstransferase	[c] : dmpp + ipdp --> grdp + ppi	Steroid biosynthesis	2.5.1.1	IspA (PP_0528)	PP_0528	IspA	0	0	1000
DXPRIi	1-deoxy-D-xylulose reductoisomerase	[c] : dxyl5p + h + nadph --> 2me4p + nadp	Steroid biosynthesis		Dxr (PP_1597)	PP_1597	Dxr	0	0	1000
DXPS	1-deoxy-D-xylulose 5-phosphate synthase	[c] : g3p + h + pyr --> co2 + dxyl5p	Steroid biosynthesis		Dxs (PP_0527)	PP_0527	Dxs	0	0	1000
GRTT	geranyltranstransferase	[c] : grdp + ipdp --> frdp + ppi	Steroid biosynthesis	2.5.1.10	IspA (PP_0528)	PP_0528	IspA	0	0	1000
IPDDI	isopentenyl-diphosphate D-isomerase	[c] : ipdp <==> dmpp	Steroid biosynthesis	5.3.3.2	Idi (PP_0565)	PP_0565	Idi	0	-1000	1000
IPDPS	1-hydroxy-2-methyl-2-(E)-butenyl 4-diphosphate reductase (ipdp)	[c] : h + h2mb4p + nadh --> h2o + ipdp + nad	Steroid biosynthesis		IspH (PP_0606)	PP_0606	IspH	0	0	1000
MECDPDH	2C-methyl-D-erythritol 2,4 cyclodiphosphate dehydratase	[c] : 2mecdp + h --> h2mb4p + h2o	Steroid biosynthesis		IspG (PP_0853)	PP_0853	IspG	0	0	1000
MECDPS	2-C-methyl-D-erythritol 2,4-cyclodiphosphate synthase	[c] : 2p4c2me --> 2mecdp + cmp	Steroid biosynthesis		IspF (PP_1618)	PP_1618	IspF	0	0	1000
MEPCT	2-C-methyl-D-erythritol 4-phosphate cytidylyltransferase	[c] : 2me4p + ctp + h --> 4c2me + ppi	Steroid biosynthesis		IspD (PP_1614)	PP_1614	IspD	0	0	1000
APSR	Adenylylsulfate (APS)reductase (aerobic)	[c] : aps + trdrd --> amp + (2) h + so3 + trdox	Sulfur Metabolism		CysH-kt (PP_2328)	PP_2328	CysH-kt	0	0	1000
FDMO	FMNH2-dependent monooxygenase	[c] : fmnh2 + isetac + o2 --> fmn + gcald + h + h2o + so3	Sulfur Metabolism		SsuDkt (PP_0238)	PP_0238	SsuDkt	0	0	1000
FDMO2	FMNH2-dependent monooxygenase (methanesulfonate)	[c] : fmnh2 + mso3 + o2 --> fald + fmn + h + h2o + so3	Sulfur Metabolism		SsuDkt (PP_0238)	PP_0238	SsuDkt	0	0	1000
FDMO3	FMNH2-dependent monooxygenase (ethanesulfonate)	[c] : ethso3 + fmnh2 + o2 --> acald + fmn + h + h2o + so3	Sulfur Metabolism		SsuDkt (PP_0238)	PP_0238	SsuDkt	0	0	1000
FDMO5	FMNH2-dependent monooxygenase (pentanesulfonate)	[c] : fmnh2 + o2 + pentso3 --> fmn + h + h2o + ptal + so3	Sulfur Metabolism		SsuDkt (PP_0238)	PP_0238	SsuDkt	0	0	1000
FDMOtau	FMNH2-dependent monooxygenase	[c] : fmnh2 + o2 + taur --> aacald + fmn + h + h2o + so3	Sulfur Metabolism		SsuDkt (PP_0238)	PP_0238	SsuDkt	0	0	1000
FMNRx2	FMN reductase	[c] : fmn + h + nadph --> fmnh2 + nadp	Sulfur Metabolism		SsuE (PP_0236)	PP_0236	SsuE	0	0	1000
MSULR	Metanesulfonate reductase (NADPH2)	[c] : ch4s + (3) h2o + (3) nadp <==> (4) h + mso3 + (3) nadph	Sulfur Metabolism	1.8.2.2				0	-1000	1000
SADT	sulfate adenylyltransferase	[c] : atp + h + so4 --> aps + ppi	Sulfur Metabolism	2.7.7.4	CysDN ( PP_1303 and PP_1304 )	( PP_1303 and PP_1304 )	CysDN	0	0	1000
SULRi	sulfite reductase (NADPH2)	[c] : (5) h + (3) nadph + so3 --> (3) h2o + h2s + (3) nadp	Sulfur Metabolism	1.8.2.2	( CysI-kt (PP_2371) and PiuB-CysJ (PP_0860) )	( PP_2371 and PP_0860 )	( CysI-kt and PiuB-CysJ )	0	0	1000
SULabcpp	sulfate transport via ABC system (periplasm)	atp[c] + h2o[c] + so4[p] --> adp[c] + h[c] + pi[c] + so4[c]	Sulfur Metabolism		( CysA (PP_5168) and CysP (PP_5171) and CysT (PP_5170) and CysW (PP_5169) )	( PP_5168 and PP_5171 and PP_5170 and PP_5169 )	( CysA and CysP and CysT and CysW )	0	0	1000
TAUDO	Taurine dioxygenase	[c] : akg + o2 + taur --> aacald + co2 + h + so3 + succ	Sulfur Metabolism	1.14.11.17	TauD (PP_0230)	PP_0230	TauD	0	0	1000
TSULabcpp	thiosulfate transport via ABC system (periplasm)	atp[c] + h2o[c] + tsul[p] --> adp[c] + h[c] + pi[c] + tsul[c]	Sulfur Metabolism		( CysA (PP_5168) and CysP (PP_5171) and CysT (PP_5170) and CysW (PP_5169) )	( PP_5168 and PP_5171 and PP_5170 and PP_5169 )	( CysA and CysP and CysT and CysW )	0	0	1000
BDH	(R)-3-Hydroxybutanoate:NAD+ oxidoreductase	[c] : bhb + nad <==> acac + h + nadh	Synthesis and degradation of Ketones Bodies	1.1.1.30	BdhA (PP_3073)	PP_3073	BdhA	0	-1000	1000
HMGL	hydroxymethylglutaryl-CoA lyase	[c] : hmgcoa --> acac + accoa	Synthesis and degradation of Ketones Bodies	4.1.3.4	MvaB (PP_3540)	PP_3540	MvaB	0	0	1000
OCOAT1	3-oxoacid CoA-transferase (Succinyl-CoA: acetoacetate)	[c] : acac + succoa --> aacoa + succ	Synthesis and degradation of Ketones Bodies	2.8.3.5	OXCT-kt ( PP_3122 and PP_3123 )	( PP_3122 and PP_3123 )	OXCT-kt	0	0	1000
ACKr	acetate kinase	[c] : ac + atp <==> actp + adp	TCA Cycle	2.7.2.1				0	-1000	1000
ACONT	aconitase	[c] : cit <==> icit	TCA Cycle	4.2.1.3	( AcnA (PP_2112) ) or ( AcnB (PP_2339) )	( PP_2112 or PP_2339 )	( AcnA ) or ( AcnB )	0	-1000	1000
ACONTa	aconitase (half-reaction A, Citrate hydro-lyase)	[c] : cit <==> acon-C + h2o	TCA Cycle	4.2.1.3	( AcnA (PP_2112) ) or ( AcnB (PP_2339) )	( PP_2112 or PP_2339 )	( AcnA ) or ( AcnB )	0	-1000	1000
ACONTb	aconitase (half-reaction B, Isocitrate hydro-lyase)	[c] : acon-C + h2o <==> icit	TCA Cycle	4.2.1.3	( AcnA (PP_2112) ) or ( AcnB (PP_2339) )	( PP_2112 or PP_2339 )	( AcnA ) or ( AcnB )	0	-1000	1000
AKGDa	oxoglutarate dehydrogenase (lipoamide)	[c] : akg + h + lpam <==> co2 + sdhlam	TCA Cycle	1.2.4.2	Kgd1-c (PP_4189)	PP_4189	Kgd1-c	0	-1000	1000
AKGDbr	oxoglutarate dehydrogenase (dihydrolipoamide S-succinyltransferase) reversible	[c] : coa + sdhlam <==> dhlam + succoa	TCA Cycle	2.3.1.61	Kgd2-c (PP_4188)	PP_4188	Kgd2-c	0	-1000	1000
CS	citrate synthase	[c] : accoa + h2o + oaa --> cit + coa + h	TCA Cycle		GltA (PP_4194)	PP_4194	GltA	0	0	1000
FUM	fumarase	[c] : fum + h2o <==> mal-L	TCA Cycle	4.2.1.2	( FumA (PP_0897) ) or ( FumC (PP_0944) ) or ( FumC-1 (PP_1755) )	( PP_0897 or PP_0944 or PP_1755 )	( FumA ) or ( FumC ) or ( FumC-1 )	0	-1000	1000
ICDHyr	isocitrate dehydrogenase (NADP)	[c] : icit + nadp <==> akg + co2 + nadph	TCA Cycle	1.1.1.42	( Icd (PP_4011) ) or ( Icd1 (PP_4012) )	( PP_4011 or PP_4012 )	( Icd ) or ( Icd1 )	0	-1000	1000
ICL	Isocitrate lyase	[c] : icit --> glx + succ	TCA Cycle	4.1.3.1	AceA (PP_4116)	PP_4116	AceA	0	0	1000
MALS	malate synthase	[c] : accoa + glx + h2o --> coa + h + mal-L	TCA Cycle	4.1.3.2	GlcB (PP_0356)	PP_0356	GlcB	0	0	1000
MDH	malate dehydrogenase	[c] : mal-L + nad <==> h + nadh + oaa	TCA Cycle	1.1.1.37	Mdh (PP_0654)	PP_0654	Mdh	0	-1000	1000
MDH2	Malate dehydrogenase (ubiquinone 8 as acceptor)	[c] : mal-L + q8 --> oaa + q8h2	TCA Cycle	1.1.99.16	( Mqo-kt1 (PP_0751) ) or ( Mqo-kt2 (PP_1251) ) or ( Mqo-kt3 (PP_2925) )	( PP_0751 or PP_1251 or PP_2925 )	( Mqo-kt1 ) or ( Mqo-kt2 ) or ( Mqo-kt3 )	0	0	1000
PC	pyruvate carboxylase	[c] : atp + hco3 + pyr --> adp + h + oaa + pi	TCA Cycle	6.4.1.1	AccC (PP_5347)	PP_5347	AccC	0	0	1000
PDHcr	Pyruvate dehydrogenase (dihydrolipoamide dehydrogenase) reversible	[c] : dhlam + nad <==> h + lpam + nadh	TCA Cycle	1.8.1.4	( Lpd (PP_4187) ) or ( Lpd-3 (PP_5366) )	( PP_4187 or PP_5366 )	( Lpd ) or ( Lpd-3 )	0	-1000	1000
PTAr	phosphotransacetylase	[c] : accoa + pi <==> actp + coa	TCA Cycle	2.3.1.8	Pta (PP_0774)	PP_0774	Pta	0	-1000	1000
SUCOAS	succinyl-CoA synthetase (ADP-forming)	[c] : atp + coa + succ <==> adp + pi + succoa	TCA Cycle	6.2.1.5	( SucC (PP_4186) and SucD (PP_4185) )	( PP_4186 and PP_4185 )	( SucC and SucD )	0	-1000	1000
AMPMS2	4-amino-2-methyl-5-phosphomethylpyrimidine synthetase	[c] : air + h2o + nad --> 4ampm + (2) for + (3) h + nadh	Thiamine Metabolism		ThiC (PP_4922)	PP_4922	ThiC	0	0	1000
HMPK1	hydroxymethylpyrimidine kinase (ATP)	[c] : 4ahmmp + atp --> 4ampm + adp + h	Thiamine Metabolism	2.7.1.49	ThiD (PP_4782)	PP_4782	ThiD	0	0	1000
3MBZALDH	Benzyl alcohol dehydrogenase	[c] : 3mbzalc + nad --> 3mbzald + h + nadh	Toluene Pathway	1.1.1.90	XylB-kt (pWW0_128)	pWW0_128	XylB-kt	0	0	1000
3MBZDH	Benzaldehyde dehydrogenase	[c] : 3mbzald + h2o + nad --> (2) h + m-tol + nadh	Toluene Pathway	1.2.1.7	XylC-kt (pWW0_131)	pWW0_131	XylC-kt	0	0	1000
3MCAT23DOX	catechol 2,3-dioxygenase (m-xylene)	[c] : 3mcat + o2 --> cchoxod + h	Toluene Pathway	1.13.11.2	XylE-kt (pWW0_097)	pWW0_097	XylE-kt	0	0	1000
4MBZALDH	Benzyl alcohol dehydrogenase	[c] : 4mbzalc + nad --> 4mbzald + h + nadh	Toluene Pathway	1.1.1.90	XylB-kt (pWW0_128)	pWW0_128	XylB-kt	0	0	1000
4MBZDH	Benzaldehyde dehydrogenase	[c] : 4mbzald + h2o + nad --> (2) h + nadh + p-tol	Toluene Pathway	1.2.1.7	XylC-kt (pWW0_131)	pWW0_131	XylC-kt	0	0	1000
4MCAT23DOX	catechol 2,3-dioxygenase	[c] : 4mcat + o2 --> h + hmccms	Toluene Pathway	1.13.11.2	XylE-kt (pWW0_097)	pWW0_097	XylE-kt	0	0	1000
4OD	4-oxalocrotonate decarboxylase	[c] : h + oxalc --> co2 + op4en	Toluene Pathway		XylI (pWW0_091)	pWW0_091	XylI	0	0	1000
4OD2	4-oxalocrotonate decarboxylase(p-xylene)	[c] : 2omcm + h --> 2hchd + co2	Toluene Pathway	4.1.1.77	XylI (pWW0_091)	pWW0_091	XylI	0	0	1000
4OT	4-oxalocrotonate tautomerase	[c] : 2hmc <==> oxalc	Toluene Pathway		XylH-kt (pWW0_090)	pWW0_090	XylH-kt	0	-1000	1000
4OT2	4-oxalocrotonate tautomerase (pXylene)	[c] : hmccm <==> 2omcm	Toluene Pathway		XylH-kt (pWW0_090)	pWW0_090	XylH-kt	0	-1000	1000
ACALD	acetaldehyde dehydrogenase (acetylating)	[c] : acald + coa + nad <==> accoa + h + nadh	Toluene Pathway	1.2.1.10	XylQ (pWW0_093)	pWW0_093	XylQ	0	-1000	1000
BZALDH	Benzyl alcohol dehydrogenase	[c] : bzalc + nad --> bzal + h + nadh	Toluene Pathway		XylB-kt (pWW0_128)	pWW0_128	XylB-kt	0	0	1000
BZDH	Benzaldehyde dehydrogenase	[c] : bzal + h2o + nad --> bz + (2) h + nadh	Toluene Pathway		XylC-kt (pWW0_131)	pWW0_131	XylC-kt	0	0	1000
CAT23DOX	catechol 2,3-dioxygenase	[c] : catechol + o2 --> 2hmcnsad	Toluene Pathway		XylE-kt (pWW0_097)	pWW0_097	XylE-kt	0	0	1000
DH3MCHCDH	1,2-dihydrodihydroxybenzoate dehydrogenase	[c] : dh3mchc + nad --> 3mcat + co2 + nadh	Toluene Pathway		XylL (pWW0_099)	pWW0_099	XylL	0	0	1000
DH4MCHCDH	1,2-dihydrodihydroxybenzoate dehydrogenase	[c] : dh4mchc + nad --> 4mcat + co2 + nadh	Toluene Pathway		XylL (pWW0_099)	pWW0_099	XylL	0	0	1000
HMSD	2-Hydroxymuconate semialdehyde	[c] : 2hmcnsad + h2o + nad --> 2hmc + (3) h + nadh	Toluene Pathway		XylG-kt (pWW0_096)	pWW0_096	XylG-kt	0	0	1000
HMSD2	2-Hydroxymuconate semialdehyde	[c] : h2o + hmccms + nad --> (2) h + hmccm + nadh	Toluene Pathway	1.2.1.32	XylG-kt (pWW0_096)	pWW0_096	XylG-kt	0	0	1000
HMSH	2-hydroxymuconic semi-aldehyde	[c] : 2hmcnsad + h2o --> for + (2) h + op4en	Toluene Pathway		XylF-kt (pWW0_095)	pWW0_095	XylF-kt	0	0	1000
HMSH2	2-hydroxymuconic semi-aldehyde (p-xylene)	[c] : h2o + hmccms --> 2hchd + for + h	Toluene Pathway	3.7.1.9	XylF-kt (pWW0_095)	pWW0_095	XylF-kt	0	0	1000
HMSH3	2-hydroxymuconic semi-aldehyde (m-xylene)	[c] : cchoxod + h2o --> ac + chpd + h	Toluene Pathway		XylF-kt (pWW0_095)	pWW0_095	XylF-kt	0	0	1000
HOPNTAL	4-hydroxy-2-oxopentanoate aldolase	[c] : 4h2opntn --> acald + pyr	Toluene Pathway		XylK (pWW0_092)	pWW0_092	XylK	0	0	1000
HOPNTAL2	4-hydroxy-2-oxopentanoate aldolase(p-xylene)	[c] : 4hoxoh --> ppal + pyr	Toluene Pathway		XylK (pWW0_092)	pWW0_092	XylK	0	0	1000
HOPNTAL3	4-hydroxy-2-oxopentanoate aldolase(m-xylene)	[c] : 4h2oxov --> acald + pyr	Toluene Pathway		XylK (pWW0_092)	pWW0_092	XylK	0	0	1000
MTOLDOX	benzoate 1,2-dioxygenase	[c] : h + m-tol + nadh + o2 --> dh3mchc + nad	Toluene Pathway	1.14.12.10	( XylX (pWW0_102) and XylY (pWW0_101) and XylZ (pWW0_100) )	( pWW0_102 and pWW0_101 and pWW0_100 )	( XylX and XylY and XylZ )	0	0	1000
MXMO	toluene monooxygenase (pWW0)	[c] : h + m-xyl + nadh + o2 --> 3mbzalc + h2o + nad	Toluene Pathway		( XylA-kt (pWW0_129) and XylM (pWW0_130) )	( pWW0_129 and pWW0_130 )	( XylA-kt and XylM )	0	0	1000
OP4ENH	2-oxopent-4-enoate hydratase	[c] : h2o + op4en --> 4h2opntn	Toluene Pathway	4.2.1.80	XylJ (pWW0_094)	pWW0_094	XylJ	0	0	1000
OP4ENH2	2-oxopent-4-enoate hydratase(p-xylene)	[c] : 2hchd + h2o --> 4hoxoh	Toluene Pathway	4.2.1.80	XylJ (pWW0_094)	pWW0_094	XylJ	0	0	1000
OP4ENH3	2-oxopent-4-enoate hydratase(m-xylene)	[c] : chpd + h2o --> 4h2oxov	Toluene Pathway	4.2.1.80	XylJ (pWW0_094)	pWW0_094	XylJ	0	0	1000
PTOLDOX	benzoate 1,2-dioxygenase	[c] : h + nadh + o2 + p-tol --> dh4mchc + nad	Toluene Pathway	1.14.12.10	( XylX (pWW0_102) and XylY (pWW0_101) and XylZ (pWW0_100) )	( pWW0_102 and pWW0_101 and pWW0_100 )	( XylX and XylY and XylZ )	0	0	1000
PXMO	toluene monooxygenase (pWW0)	[c] : h + nadh + o2 + p-xyl --> 4mbzalc + h2o + nad	Toluene Pathway		( XylA-kt (pWW0_129) and XylM (pWW0_130) )	( pWW0_129 and pWW0_130 )	( XylA-kt and XylM )	0	0	1000
XMO	toluene monooxygenase (pWW0)	[c] : h + nadh + o2 + tol --> bzalc + h2o + nad	Toluene Pathway		( XylA-kt (pWW0_129) and XylM (pWW0_130) )	( pWW0_129 and pWW0_130 )	( XylA-kt and XylM )	0	0	1000
2DHGLCNkt-tpp	2-ketogluconate transporter	2dhglcn[p] + h[p] --> 2dhglcn[c] + h[c]	Transport		KguT (PP_3377)	PP_3377	KguT	0	0	1000
2DHGLCNtex	ketogluconate transport via diffusion (extracellular to periplasm)	2dhglcn[e] <==> 2dhglcn[p]	Transport					0	-1000	1000
34DHCINMtex	DHCINM transport via diffusion (extracellular to periplasm)	34dhcinm[e] <==> 34dhcinm[p]	Transport					0	-1000	1000
34DHCINMtpp	DHCINM transport via diffusion ( periplasm)	34dhcinm[p] <==> 34dhcinm[c]	Transport					0	-1000	1000
3OXOADPt(ex)	3-oxoadipate transport (e)	3oxoadp[e] <==> 3oxoadp[p]	Transport					0	-1000	1000
4HBZte	4-Hydroxybenzoate transport (ex)	4hbz[e] <==> 4hbz[p]	Transport					0	-1000	1000
ABUTt2pp	4-aminobutyrate transport in via proton symport (periplasm)	4abut[p] + h[p] --> 4abut[c] + h[c]	Transport		GabP (PP_4106)	PP_4106	GabP	0	0	1000
ABUTtex	4-aminobutyrate transport via diffusion (extracellular to periplasm)	4abut[e] <==> 4abut[p]	Transport					0	-1000	1000
ACONCtex	cis-aconitate transport, external	acon-C[e] <==> acon-C[p]	Transport		OpdH (PP_1419)	PP_1419	OpdH	0	-1000	1000
ACt2pp	acetate transport in via proton symport	ac[p] + h[p] --> ac[c] + h[c]	Transport		DctA (PP_1188)	PP_1188	DctA	0	0	1000
ACtex	Acetate transport via diffusion (extracellular to periplasm)	ac[e] <==> ac[p]	Transport					0	-1000	1000
AKGt2rpp	2-oxoglutarate reversible transport via symport (periplasm)	akg[p] + h[p] <==> akg[c] + h[c]	Transport		KgtP (PP_1400)	PP_1400	KgtP	0	-1000	1000
AKGtex	alpha-ketoglutarate transport via diffusion (extracellular to periplasm)	akg[e] <==> akg[p]	Transport					0	-1000	1000
ALAtex	L-alanine transport via diffusion (extracellular to periplasm)	ala-L[e] <==> ala-L[p]	Transport					0	-1000	1000
ARGORNt7pp	arginine/ornithine antiporter (periplasm)	arg-L[p] + orn[c] <==> arg-L[c] + orn[p]	Transport		ArcD (PP_1002)	PP_1002	ArcD	0	-1000	1000
ARGabcpp	L-arginine transport via ABC system (periplasm)	arg-L[p] + atp[c] + h2o[c] --> adp[c] + arg-L[c] + h[c] + pi[c]	Transport		( AapJ (PP_1297) and AapM (PP_1299) and AapP (PP_1300) and AapQ (PP_1298) ) or ( LysT-kt2 ( PP_4483 and PP_4484 and PP_4485 and PP_4486 ) )	( ( PP_1297 and PP_1299 and PP_1300 and PP_1298 ) or ( PP_4483 and PP_4484 and PP_4485 and PP_4486 ) )	( AapJ and AapM and AapP and AapQ ) or ( LysT-kt2 )	0	0	1000
ARGtex	L-arginine transport via diffusion (extracellular to periplasm)	arg-L[e] <==> arg-L[p]	Transport		OprD (PP_1206)	PP_1206	OprD	0	-1000	1000
ASPabcpp	L-aspartate transport via ABC system (periplasm)	asp-L[p] + atp[c] + h2o[c] --> adp[c] + asp-L[c] + h[c] + pi[c]	Transport		( GltIJKL ( PP_1068 and PP_1069 and PP_1070 and PP_1071 ) ) or ( AapJ (PP_1297) and AapM (PP_1299) and AapP (PP_1300) and AapQ (PP_1298) )	( ( PP_1068 and PP_1069 and PP_1070 and PP_1071 ) or ( PP_1297 and PP_1299 and PP_1300 and PP_1298 ) )	( GltIJKL ) or ( AapJ and AapM and AapP and AapQ )	0	0	1000
ASPt2_2pp	Aspartate transport via proton symport (2 H) (periplasm)	asp-L[p] + (2) h[p] --> asp-L[c] + (2) h[c]	Transport		DctA (PP_1188)	PP_1188	DctA	0	0	1000
ASPtex	L-aspartate transport via diffusion (extracellular to periplasm)	asp-L[e] <==> asp-L[p]	Transport					0	-1000	1000
CATECHOLtex	catechol transport via diffusion (extracellular to periplasm)	catechol[e] <==> catechol[p]	Transport					0	-1000	1000
CATECHOLtpp	catechol transport via diffusion ( periplasm)	catechol[p] <==> catechol[c]	Transport					0	-1000	1000
CHLabcpp	choline transport via ABC system (periplasm)	atp[c] + chol[p] + h2o[c] --> adp[c] + chol[c] + h[c] + pi[c]	Transport		( OpuBA (PP_0868) and OpuBB ( PP_0869 ) or ( PP_0871 ) and OpuBC (PP_0870) )	( PP_0868 and ( PP_0869 or PP_0871 ) and PP_0870 )	( OpuBA and OpuBB and OpuBC )	0	0	1000
CHLtex	choline transport via diffusion (extracellular to periplasm)	chol[e] <==> chol[p]	Transport					0	-1000	1000
CHOLS(ex)	Choline sulfate transport difusion	chols[e] <==> chols[p]	Transport		CysM (PP_1654)	PP_1654	CysM	0	-1000	1000
CITt-kt	citrate transport in via proton symport	cit[p] + h[p] <==> cit[c] + h[c]	Transport		( CitM-kt1 (PP_0147) ) or ( CitM-kt2 (PP_2057) ) or ( CitM-kt3 (PP_2703) )	( PP_0147 or PP_2057 or PP_2703 )	( CitM-kt1 ) or ( CitM-kt2 ) or ( CitM-kt3 )	0	-1000	1000
CITtex	citrate transport via diffusion (extracellular to periplasm)	cit[e] <==> cit[p]	Transport		OpdH (PP_1419)	PP_1419	OpdH	0	-1000	1000
CO2tex	CO2 transport via diffusion (extracellular to periplasm)	co2[e] <==> co2[p]	Transport					0	-1000	1000
COBALT2tex	cobalt (Co+2) transport via diffusion (extracellular to periplasm)	cobalt2[e] <==> cobalt2[p]	Transport					0	-1000	1000
COBALT2tpp	cobalt transport in via permease (no H+)	cobalt2[p] --> cobalt2[c]	Transport		CorA1 (PP_2955)	PP_2955	CorA1	0	0	1000
CONFRLtex	conyferyl alcohol transport via diffusion (extracellular to periplasm)	confrl[e] <==> confrl[p]	Transport					0	-1000	1000
CONFRLtpp	conyferyl alcohol transport via diffusion ( periplasm)	confrl[p] <==> confrl[c]	Transport					0	-1000	1000
CRNabcpp	L-carnitine transport via ABC system (periplasm)	atp[c] + crn[p] + h2o[c] --> adp[c] + crn[c] + h[c] + pi[c]	Transport		( OpuBA (PP_0868) and OpuBB ( PP_0869 ) or ( PP_0871 ) and OpuBC (PP_0870) )	( PP_0868 and ( PP_0869 or PP_0871 ) and PP_0870 )	( OpuBA and OpuBB and OpuBC )	0	0	1000
CYSabcpp	L-cysteine uptake via ABC system (periplasm)	atp[c] + cys-L[p] + h2o[c] --> adp[c] + cys-L[c] + h[c] + pi[c]	Transport		( FliY (PP_0225) and YecC (PP_0227) and YecS (PP_0226) )	( PP_0225 and PP_0227 and PP_0226 )	( FliY and YecC and YecS )	0	0	1000
CYStex	L-cysteine transport via diffusion (extracellular to periplasm)	cys-L[e] <==> cys-L[p]	Transport					0	-1000	1000
D-LACt2pp	D-lactate transport via proton symport (periplasm)	h[p] + lac-D[p] <==> h[c] + lac-D[c]	Transport		IctP (PP_4735)	PP_4735	IctP	0	-1000	1000
D-LACtex	D-lactate transport via diffusion (extracellular to periplasm)	lac-D[e] <==> lac-D[p]	Transport					0	-1000	1000
DCAtex	Decanoate transport via diffusion (extracellular to periplasm)	dca[e] <==> dca[p]	Transport					0	-1000	1000
DDCAtex	Fatty acid (dodecanoate) transport via diffusion (extracellular to periplasm)	ddca[e] <==> ddca[p]	Transport					0	-1000	1000
ETHSO3abcpp	ethanesulfonate transport via ABC system (periplasm)	atp[c] + ethso3[p] + h2o[c] --> adp[c] + ethso3[c] + h[c] + pi[c]	Transport		( SsuA (PP_0237) and SsuB (PP_0240) and SsuC (PP_0239) ) or ( TauA (PP_0233) and TauB (PP_0232) and TauC (PP_0231) )	( ( PP_0237 and PP_0240 and PP_0239 ) or ( PP_0233 and PP_0232 and PP_0231 ) )	( SsuA and SsuB and SsuC ) or ( TauA and TauB and TauC )	0	0	1000
ETHSO3tex	ethanesulfonate transport via diffusion (extracellular to periplasm)	ethso3[e] <==> ethso3[p]	Transport		OprE (PP_0234)	PP_0234	OprE	0	-1000	1000
FE2abc	iron (II) transport via ABC system	atp[c] + fe2[e] + h2o[c] --> adp[c] + fe2[c] + h[c] + pi[c]	Transport		( AfuA (PP_4881) and AfuB (PP_4882) and AfuC (PP_1078) )	( PP_4881 and PP_4882 and PP_1078 )	( AfuA and AfuB and AfuC )	0	0	1000
FE2t1	iron (II) transport	fe2[e] <==> fe2[c]	Transport					0	-1000	1000
FERtex	ferulate transport via diffusion (extracellular to periplasm)	fer[e] <==> fer[p]	Transport					0	-1000	1000
FERtpp	ferulate transport via diffusion ( periplasm )	fer[p] <==> fer[c]	Transport					0	-1000	1000
FUMt2_2pp	Fumarate transport via proton symport (2 H) (periplasm)	fum[p] + (2) h[p] --> fum[c] + (2) h[c]	Transport		DctA (PP_1188)	PP_1188	DctA	0	0	1000
FUMtex	Fumarate transport via diffusion (extracellular to periplasm)	fum[e] <==> fum[p]	Transport					0	-1000	1000
GAt1	Gallate outer membrane porin transport	ga[e] <==> ga[p]	Transport					0	-1000	1000
GAt2pp	GA/proton symport transport	ga[p] + h[p] <==> ga[c] + h[c]	Transport					0	-1000	1000
GLCNt2rpp	D-gluconate transport via proton symport, reversible (periplasm)	glcn[p] + h[p] <==> glcn[c] + h[c]	Transport		GntP (PP_3417)	PP_3417	GntP	0	-1000	1000
GLCNtex	D-gluconate transport via diffusion (extracellular to periplasm)	glcn[e] <==> glcn[p]	Transport					0	-1000	1000
GLCabcpp	D-glucose transport via ABC system (periplasm)	atp[c] + glc-D[p] + h2o[c] --> adp[c] + glc-D[c] + h[c] + pi[c]	Transport		( GtsA (PP_1015) and GtsB (PP_1016) and GtsC (PP_1017) and GtsD (PP_1018) )	( PP_1015 and PP_1016 and PP_1017 and PP_1018 )	( GtsA and GtsB and GtsC and GtsD )	0	0	1000
GLUabcpp	L-glutamate transport via ABC system (periplasm)	atp[c] + glu-L[p] + h2o[c] --> adp[c] + glu-L[c] + h[c] + pi[c]	Transport		( GltIJKL ( PP_1068 and PP_1069 and PP_1070 and PP_1071 ) ) or ( AapJ (PP_1297) and AapM (PP_1299) and AapP (PP_1300) and AapQ (PP_1298) )	( ( PP_1068 and PP_1069 and PP_1070 and PP_1071 ) or ( PP_1297 and PP_1299 and PP_1300 and PP_1298 ) )	( GltIJKL ) or ( AapJ and AapM and AapP and AapQ )	0	0	1000
GLUt4pp	Na+/glutamate symport (periplasm)	glu-L[p] + na1[p] --> glu-L[c] + na1[c]	Transport		GltS (PP_0996)	PP_0996	GltS	0	0	1000
GLUtex	L-glutamate transport via diffusion (extracellular to periplasm)	glu-L[e] <==> glu-L[p]	Transport		OpdP (PP_0883)	PP_0883	OpdP	0	-1000	1000
GLYALDtex	Glyceraldehyde transport via diffusion (extracellular to periplasm)	glyald[e] <==> glyald[p]	Transport					0	-1000	1000
GLYBtex	Glycine betaine transport via diffusion (extracellular to periplasm)	glyb[e] <==> glyb[p]	Transport					0	-1000	1000
GLYCLTt2rpp	glycolate transport via proton symport, reversible (periplasm)	glyclt[p] + h[p] <==> glyclt[c] + h[c]	Transport		IctP (PP_4735)	PP_4735	IctP	0	-1000	1000
GLYCLTtex	glycolate transport via diffusion (extracellular to periplasm)	glyclt[e] <==> glyclt[p]	Transport					0	-1000	1000
GLYCtex	glycerol transport via diffusion (extracellular to periplasm)	glyc[e] <==> glyc[p]	Transport		( OprB-1 (PP_1019) ) or ( OprB-2 (PP_1445) )	( PP_1019 or PP_1445 )	( OprB-1 ) or ( OprB-2 )	0	-1000	1000
GLYabcpp	glycine transport via ABC system	atp[c] + gly[p] + h2o[c] <==> adp[c] + gly[c] + h[c] + pi[c]	Transport		( AapJ (PP_1297) and AapM (PP_1299) and AapP (PP_1300) and AapQ (PP_1298) )	( PP_1297 and PP_1299 and PP_1300 and PP_1298 )	( AapJ and AapM and AapP and AapQ )	0	-1000	1000
GLYtex	Glycine transport via diffusion (extracellular to periplasm)	gly[e] <==> gly[p]	Transport		OpdP (PP_0883)	PP_0883	OpdP	0	-1000	1000
H2Otex	H2O transport via diffusion (extracellular to periplasm)	h2o[e] <==> h2o[p]	Transport					0	-1000	1000
H2Otpp	H2O transport via diffusion (periplasm)	h2o[p] <==> h2o[c]	Transport					0	-1000	1000
H2tex	hydrogen transport via diffusion (extracellular to periplasm)	h2[e] <==> h2[p]	Transport					0	-1000	1000
H2tpp	hydrogen transport diffusion (periplasm)	h2[p] <==> h2[c]	Transport					0	-1000	1000
HCO3_NAt	bicarbonate transport (Na/HCO3 cotransport)	hco3[e] + na1[e] <==> hco3[c] + na1[c]	Transport					0	-1000	1000
HDCAtex	Hexadecanoate transport via diffusion (extracellular to periplasm)	hdca[e] <==> hdca[p]	Transport					0	-1000	1000
HISabcpp	L-histidine transport via ABC system (periplasm)	atp[c] + h2o[c] + his-L[p] --> adp[c] + h[c] + his-L[c] + pi[c]	Transport		( AapJ (PP_1297) and AapM (PP_1299) and AapP (PP_1300) and AapQ (PP_1298) )	( PP_1297 and PP_1299 and PP_1300 and PP_1298 )	( AapJ and AapM and AapP and AapQ )	0	0	1000
HIStex	L-histidine transport via diffusion (extracellular to periplasm)	his-L[e] <==> his-L[p]	Transport		OpdC (PP_0799)	PP_0799	OpdC	0	-1000	1000
HXAtex	Hexanoate transport via diffusion (extracellular to periplasm)	hxa[e] <==> hxa[p]	Transport					0	-1000	1000
Htex	proton transport via diffusion (extracellular to periplasm)	h[e] <==> h[p]	Transport					0	-1000	1000
ICITt-kt	isocitrate transport in via proton symport	h[p] + icit[p] <==> h[c] + icit[c]	Transport		( CitM-kt1 (PP_0147) ) or ( CitM-kt2 (PP_2057) ) or ( CitM-kt3 (PP_2703) )	( PP_0147 or PP_2057 or PP_2703 )	( CitM-kt1 ) or ( CitM-kt2 ) or ( CitM-kt3 )	0	-1000	1000
ICITtex	isocitrate transport, external	icit[e] <==> icit[p]	Transport		OpdH (PP_1419)	PP_1419	OpdH	0	-1000	1000
ILEabcpp	L-isoleucine transport via ABC system (periplasm)	atp[c] + h2o[c] + ile-L[p] --> adp[c] + h[c] + ile-L[c] + pi[c]	Transport		( BraGFEDC ( PP_1137 and PP_1138 and PP_1139 and PP_1140 and PP_1141 ) ) or ( AapJ (PP_1297) and AapM (PP_1299) and AapP (PP_1300) and AapQ (PP_1298) ) or ( LivF-kt5 (PP_4863) and LivG-kt5 (PP_4864) and LivH-kt5 (PP_4866) and LivK-kt5 (PP_4867) and LivM-kt5 (PP_4865) )	( ( PP_1137 and PP_1138 and PP_1139 and PP_1140 and PP_1141 ) or ( PP_1297 and PP_1299 and PP_1300 and PP_1298 ) or ( PP_4863 and PP_4864 and PP_4866 and PP_4867 and PP_4865 ) )	( BraGFEDC ) or ( AapJ and AapM and AapP and AapQ ) or ( LivF-kt5 and LivG-kt5 and LivH-kt5 and LivK-kt5 and LivM-kt5 )	0	0	1000
ILEtex	L-isoleucine transport via diffusion (extracellular to periplasm)	ile-L[e] <==> ile-L[p]	Transport					0	-1000	1000
ISETACabcpp	isethionate transport via ABC system (periplasm)	atp[c] + h2o[c] + isetac[p] --> adp[c] + h[c] + isetac[c] + pi[c]	Transport		( SsuA (PP_0237) and SsuB (PP_0240) and SsuC (PP_0239) ) or ( TauA (PP_0233) and TauB (PP_0232) and TauC (PP_0231) )	( ( PP_0237 and PP_0240 and PP_0239 ) or ( PP_0233 and PP_0232 and PP_0231 ) )	( SsuA and SsuB and SsuC ) or ( TauA and TauB and TauC )	0	0	1000
ISETACtex	isethionate transport via diffusion (extracellular to periplasm)	isetac[e] <==> isetac[p]	Transport		OprE (PP_0234)	PP_0234	OprE	0	-1000	1000
L-LACt2rpp	L-lactate reversible transport via proton symport (periplasm)	h[p] + lac-L[p] <==> h[c] + lac-L[c]	Transport		IctP (PP_4735)	PP_4735	IctP	0	-1000	1000
L-LACtex	L-lactate transport via diffusion (extracellular to periplasm)	lac-L[e] <==> lac-L[p]	Transport					0	-1000	1000
LEUabcpp	L-leucine transport via ABC system (periplasm)	atp[c] + h2o[c] + leu-L[p] --> adp[c] + h[c] + leu-L[c] + pi[c]	Transport		( BraGFEDC ( PP_1137 and PP_1138 and PP_1139 and PP_1140 and PP_1141 ) ) or ( AapJ (PP_1297) and AapM (PP_1299) and AapP (PP_1300) and AapQ (PP_1298) ) or ( LivF-kt5 (PP_4863) and LivG-kt5 (PP_4864) and LivH-kt5 (PP_4866) and LivK-kt5 (PP_4867) and LivM-kt5 (PP_4865) )	( ( PP_1137 and PP_1138 and PP_1139 and PP_1140 and PP_1141 ) or ( PP_1297 and PP_1299 and PP_1300 and PP_1298 ) or ( PP_4863 and PP_4864 and PP_4866 and PP_4867 and PP_4865 ) )	( BraGFEDC ) or ( AapJ and AapM and AapP and AapQ ) or ( LivF-kt5 and LivG-kt5 and LivH-kt5 and LivK-kt5 and LivM-kt5 )	0	0	1000
LEUtex	L-leucine transport via diffusion (extracellular to periplasm)	leu-L[e] <==> leu-L[p]	Transport					0	-1000	1000
M-XYLtpp	passive diffusion	m-xyl[p] <==> m-xyl[c]	Transport					0	-1000	1000
M-Xylt1	m-xylene outer membrane porin transport	m-xyl[e] <==> m-xyl[p]	Transport					0	-1000	1000
MALt2_2pp	Malate transport via proton symport (2 H) (periplasm)	(2) h[p] + mal-L[p] --> (2) h[c] + mal-L[c]	Transport		DctA (PP_1188)	PP_1188	DctA	0	0	1000
MALtex	Malate transport via diffusion (extracellular to periplasm)	mal-L[e] <==> mal-L[p]	Transport					0	-1000	1000
METabcpp	L-methionine transport via ABC system (periplasm)	atp[c] + h2o[c] + met-L[p] --> adp[c] + h[c] + met-L[c] + pi[c]	Transport		( AapJ (PP_1297) and AapM (PP_1299) and AapP (PP_1300) and AapQ (PP_1298) )	( PP_1297 and PP_1299 and PP_1300 and PP_1298 )	( AapJ and AapM and AapP and AapQ )	0	0	1000
METtex	L-methionine transport via diffusion (extracellular to periplasm)	met-L[e] <==> met-L[p]	Transport					0	-1000	1000
MSO3abcpp	methanesulfonate transport via ABC system (periplasm)	atp[c] + h2o[c] + mso3[p] --> adp[c] + h[c] + mso3[c] + pi[c]	Transport		( SsuA (PP_0237) and SsuB (PP_0240) and SsuC (PP_0239) ) or ( TauA (PP_0233) and TauB (PP_0232) and TauC (PP_0231) )	( ( PP_0237 and PP_0240 and PP_0239 ) or ( PP_0233 and PP_0232 and PP_0231 ) )	( SsuA and SsuB and SsuC ) or ( TauA and TauB and TauC )	0	0	1000
MSO3tex	methanesulfonate transport via diffusion (extracellular to periplasm)	mso3[e] <==> mso3[p]	Transport		OprE (PP_0234)	PP_0234	OprE	0	-1000	1000
NACt1pp	Nicotinic acid transport via proton symport (periplasm)	h[p] + nac[p] <==> h[c] + nac[c]	Transport					0	-1000	1000
NACtex	Nicotinic acid transport via diffusion (extracellular to periplasm)	nac[e] <==> nac[p]	Transport					0	-1000	1000
NAt3_1p5pp	sodium proton antiporter (H:NA is 1.5) (periplasm)	(3) h[p] + (2) na1[c] --> (3) h[c] + (2) na1[p]	Transport		NhaB (PP_4031)	PP_4031	NhaB	0	0	1000
NAt3_2pp	sodium proton antiporter (H:NA is 2) (periplasm)	(2) h[p] + na1[c] --> (2) h[c] + na1[p]	Transport		NhaA (PP_1132)	PP_1132	NhaA	0	0	1000
NAtex	sodium transport via diffusion (extracellular to periplasm)	na1[e] <==> na1[p]	Transport					0	-1000	1000
NH4tex	ammonia transport via diffusion (extracellular to periplasm)	nh4[e] <==> nh4[p]	Transport					0	-1000	1000
NH4tpp	ammonia reversible transport (periplasm)	nh4[p] <==> nh4[c]	Transport		AmtB (PP_5233)	PP_5233	AmtB	0	-1000	1000
NI2tex	nickel transport via diffusion (extracellular to periplasm)	ni2[e] <==> ni2[p]	Transport					0	-1000	1000
NI2uabcpp	nickel transport via ABC system (uptake, periplasm)	atp[c] + h2o[c] + ni2[p] --> adp[c] + h[c] + ni2[c] + pi[c]	Transport		( NikA (PP_3342) and NikB (PP_3343) and NikC (PP_3344) and NikD (PP_3345) and NikE (PP_3346) )	( PP_3342 and PP_3343 and PP_3344 and PP_3345 and PP_3346 )	( NikA and NikB and NikC and NikD and NikE )	0	0	1000
NO2t2rpp	nitrite transport in via proton symport, reversible (periplasm)	h[p] + no2[p] <==> h[c] + no2[c]	Transport		Nitkt1(p) (PP_1156)	PP_1156	Nitkt1(p)	0	-1000	1000
NO2tex	nitrite transport via diffusion (extracellular to periplasm)	no2[e] <==> no2[p]	Transport					0	-1000	1000
O2tpp	o2 transport via diffusion (periplasm)	o2[p] <==> o2[c]	Transport					0	-1000	1000
OCTAtex	Octanoate transport via diffusion (extracellular to periplasm)	octa[e] <==> octa[p]	Transport					0	-1000	1000
ORNtex	ornithine transport via diffusion (extracellular to periplasm)	orn[e] <==> orn[p]	Transport					0	-1000	1000
P-XYLtpp	passive diffusion	p-xyl[p] <==> p-xyl[c]	Transport					0	-1000	1000
P-Xylt1	p-xylene outer membrane porin transport	p-xyl[e] <==> p-xyl[p]	Transport					0	-1000	1000
PENTSOtex	pentasulfonate transport via diffusion (extracellular to periplasm)	pentso3[e] <==> pentso3[p]	Transport		OprE (PP_0234)	PP_0234	OprE	0	-1000	1000
PHEt2rpp	L-phenylalanine reversible transport via proton symport (periplasm)	h[p] + phe-L[p] <==> h[c] + phe-L[c]	Transport		( AaaT-kt1 (PP_4492) ) or ( AaaT-kt2 (PP_4495) )	( PP_4492 or PP_4495 )	( AaaT-kt1 ) or ( AaaT-kt2 )	0	-1000	1000
PHEtex	L-phenylalanine transport via diffusion (extracellular to periplasm)	phe-L[e] <==> phe-L[p]	Transport					0	-1000	1000
PIt2rpp	phosphate reversible transport via symport (periplasm)	h[p] + pi[p] <==> h[c] + pi[c]	Transport					0	-1000	1000
PItex	phosphate transport via diffusion (extracellular to periplasm)	pi[e] <==> pi[p]	Transport					0	-1000	1000
PIuabcpp	phosphate transport via ABC system (uptake, periplasm)	atp[c] + h2o[c] + pi[p] --> adp[c] + h[c] + (2) pi[c]	Transport		( PstA-kt1 (PP_2658) and PstB-kt1 (PP_2659) and PstC-kt1 (PP_2657) and PstS-kt1 (PP_2656) ) or ( PstA (PP_5327) and PstB (PP_5326) and PstC (PP_5328) and PstS (PP_5329) )	( ( PP_2658 and PP_2659 and PP_2657 and PP_2656 ) or ( PP_5327 and PP_5326 and PP_5328 and PP_5329 ) )	( PstA-kt1 and PstB-kt1 and PstC-kt1 and PstS-kt1 ) or ( PstA and PstB and PstC and PstS )	0	0	1000
PPAt4pp	Na+/Propionate symporter (periplasm)	na1[p] + ppa[p] --> na1[c] + ppa[c]	Transport					0	0	1000
PPAtex	propionate transport via diffusion	ppa[e] <==> ppa[p]	Transport					0	-1000	1000
PROtex	L-proline transport via diffusion (extracellular to periplasm)	pro-L[e] <==> pro-L[p]	Transport		OpdB (PP_5250)	PP_5250	OpdB	0	-1000	1000
PTRCabcpp	putrescine transport via ABC system (periplasm)	atp[c] + h2o[c] + ptrc[p] --> adp[c] + h[c] + pi[c] + ptrc[c]	Transport		( PotA (PP_0411) and PotB (PP_0413) and PotC (PP_0414) and PotD (PP_0412) ) or ( PotF-kt1 (PP_5180) and PotG (PP_5179) and PotH (PP_5178) and PotI (PP_5177) ) or ( PotF-kt2 (PP_5182) and PotG (PP_5179) and PotH (PP_5178) and PotI (PP_5177) )	( ( PP_0411 and PP_0413 and PP_0414 and PP_0412 ) or ( PP_5180 and PP_5179 and PP_5178 and PP_5177 ) or ( PP_5182 and PP_5179 and PP_5178 and PP_5177 ) )	( PotA and PotB and PotC and PotD ) or ( PotF-kt1 and PotG and PotH and PotI ) or ( PotF-kt2 and PotG and PotH and PotI )	0	0	1000
PTRCtex	putrescine transport via diffusion (extracellular to periplasm)	ptrc[e] <==> ptrc[p]	Transport					0	-1000	1000
QUINtex	Quinate transport via diffusion (extracellular to periplasm)	quin-kt[e] <==> quin-kt[p]	Transport		QuiX (PP_3570)	PP_3570	QuiX	0	-1000	1000
QUINtpp	Quinate/proton symport transport	h[p] + quin-kt[p] <==> h[c] + quin-kt[c]	Transport					0	-1000	1000
RBKr	ribokinase reversible	[c] : atp + rib-D <==> adp + h + r5p	Transport	2.7.1.15	RbsK (PP_2458)	PP_2458	RbsK	0	-1000	1000
RIBabcpp	D-ribose transport via ABC system (periplasm)	atp[c] + h2o[c] + rib-D[p] --> adp[c] + h[c] + pi[c] + rib-D[c]	Transport		( RbsA (PP_2455) and RbsB (PP_2454) and RbsC (PP_2456) and RbsDec (PP_2459) )	( PP_2455 and PP_2454 and PP_2456 and PP_2459 )	( RbsA and RbsB and RbsC and RbsDec )	0	0	1000
RIBtex	ribose transport via diffusion (extracellular to periplasm)	rib-D[e] <==> rib-D[p]	Transport					0	-1000	1000
SERt2rpp	L-serine reversible transport via proton symport (periplasm)	h[p] + ser-L[p] <==> h[c] + ser-L[c]	Transport		SdaC (PP_3589)	PP_3589	SdaC	0	-1000	1000
SERtex	L-serine transport via diffusion (extracellular to periplasm)	ser-L[e] <==> ser-L[p]	Transport					0	-1000	1000
SO4t4_2	sulfate transport via sodium symport	(2) na1[e] + so4[e] <==> (2) na1[c] + so4[c]	Transport		Trk-kt (PP_3931)	PP_3931	Trk-kt	0	-1000	1000
SO4tex	sulfate transport via diffusion (extracellular to periplasm)	so4[e] <==> so4[p]	Transport					0	-1000	1000
SPMDabcpp	spermidine transport via ABC system (periplasm)	atp[c] + h2o[c] + spmd[p] --> adp[c] + h[c] + pi[c] + spmd[c]	Transport		( PotA (PP_0411) and PotB (PP_0413) and PotC (PP_0414) and PotD (PP_0412) )	( PP_0411 and PP_0413 and PP_0414 and PP_0412 )	( PotA and PotB and PotC and PotD )	0	0	1000
SPMDtex	spermidine transport via diffusion (extracellular to periplasm)	spmd[e] <==> spmd[p]	Transport					0	-1000	1000
SUCCt2_2pp	succinate transport via proton symport (2 H) (periplasm)	(2) h[p] + succ[p] --> (2) h[c] + succ[c]	Transport		DctA (PP_1188)	PP_1188	DctA	0	0	1000
SUCCtex	succinate transport via diffusion (extracellular to periplasm)	succ[e] <==> succ[p]	Transport					0	-1000	1000
T4HCINNMtex	T4HCINNM transport via diffusion (extracellular to periplasm)	T4hcinnm[e] <==> T4hcinnm[p]	Transport					0	-1000	1000
T4HCINNMtpp	T4HCINNM transport via diffusion (periplasm)	T4hcinnm[p] <==> T4hcinnm[c]	Transport					0	-1000	1000
TAURabcpp	taurine transport via ABC system (periplasm)	atp[c] + h2o[c] + taur[p] --> adp[c] + h[c] + pi[c] + taur[c]	Transport		( TauA (PP_0233) and TauB (PP_0232) and TauC (PP_0231) ) or ( SsuA (PP_0237) and SsuB (PP_0240) and SsuC (PP_0239) )	( ( PP_0233 and PP_0232 and PP_0231 ) or ( PP_0237 and PP_0240 and PP_0239 ) )	( TauA and TauB and TauC ) or ( SsuA and SsuB and SsuC )	0	0	1000
TAURtex	taurine transport via diffusion (extracellular to periplasm)	taur[e] <==> taur[p]	Transport		OprE (PP_0234)	PP_0234	OprE	0	-1000	1000
THRabcpp	L-threonine transport via ABC system (periplasm)	atp[c] + h2o[c] + thr-L[p] --> adp[c] + h[c] + pi[c] + thr-L[c]	Transport		BraGFEDC ( PP_1137 and PP_1138 and PP_1139 and PP_1140 and PP_1141 )	( PP_1137 and PP_1138 and PP_1139 and PP_1140 and PP_1141 )	BraGFEDC	0	0	1000
THRtex	L-threonine transport via diffusion (extracellular to periplasm)	thr-L[e] <==> thr-L[p]	Transport					0	-1000	1000
TOLt1	toluene outer membrane porin transport	tol[e] <==> tol[p]	Transport		XylN (pWW0_127)	pWW0_127	XylN	0	-1000	1000
TOLtpp	passive diffusion	tol[p] <==> tol[c]	Transport					0	-1000	1000
TSULtex	thiosulfate transport via diffusion (extracellular to periplasm)	tsul[e] <==> tsul[p]	Transport					0	-1000	1000
TTDCAtex	Tetradecanoate transport via diffusion (extracellular to periplasm)	ttdca[e] <==> ttdca[p]	Transport					0	-1000	1000
TYRt2rpp	L-tyrosine reversible transport via proton symport (periplasm)	h[p] + tyr-L[p] <==> h[c] + tyr-L[c]	Transport		( AaaT-kt1 (PP_4492) ) or ( AaaT-kt2 (PP_4495) )	( PP_4492 or PP_4495 )	( AaaT-kt1 ) or ( AaaT-kt2 )	0	-1000	1000
TYRtex	L-tyrosine transport via diffusion (extracellular to periplasm)	tyr-L[e] <==> tyr-L[p]	Transport		OpdT (PP_3630)	PP_3630	OpdT	0	-1000	1000
VALabcpp	L-valine transport via ABC system (periplasm)	atp[c] + h2o[c] + val-L[p] --> adp[c] + h[c] + pi[c] + val-L[c]	Transport		( BraGFEDC ( PP_1137 and PP_1138 and PP_1139 and PP_1140 and PP_1141 ) ) or ( AapJ (PP_1297) and AapM (PP_1299) and AapP (PP_1300) and AapQ (PP_1298) ) or ( BraGFEDC ( PP_1137 and PP_1138 and PP_1139 and PP_1140 and PP_1141 ) ) or ( LivF-kt5 (PP_4863) and LivG-kt5 (PP_4864) and LivH-kt5 (PP_4866) and LivK-kt5 (PP_4867) and LivM-kt5 (PP_4865) )	( ( PP_1137 and PP_1138 and PP_1139 and PP_1140 and PP_1141 ) or ( PP_1297 and PP_1299 and PP_1300 and PP_1298 ) or ( PP_1137 and PP_1138 and PP_1139 and PP_1140 and PP_1141 ) or ( PP_4863 and PP_4864 and PP_4866 and PP_4867 and PP_4865 ) )	( BraGFEDC ) or ( AapJ and AapM and AapP and AapQ ) or ( BraGFEDC ) or ( LivF-kt5 and LivG-kt5 and LivH-kt5 and LivK-kt5 and LivM-kt5 )	0	0	1000
VALtex	L-valine transport via diffusion (extracellular to periplasm)	val-L[e] <==> val-L[p]	Transport					0	-1000	1000
VANKpp	Vanillate/proton symport transport	h[p] + vanlt[p] <==> h[c] + vanlt[c]	Transport		VanK (PP_3740)	PP_3740	VanK	0	-1000	1000
VANLNtex	Vanillin transport via diffusion (extracellular to periplasm)	vanln[e] <==> vanln[p]	Transport		VanP (PP_3739)	PP_3739	VanP	0	-1000	1000
VANLTtex	Vanillate transport via diffusion (extracellular to periplasm)	vanlt[e] <==> vanlt[p]	Transport		VanP (PP_3739)	PP_3739	VanP	0	-1000	1000
VNLNpp	Vanillin/proton symport transport	h[p] + vanln[p] <==> h[c] + vanln[c]	Transport		VanK (PP_3740)	PP_3740	VanK	0	-1000	1000
pentso3abcpp	pentanesulfonate transport via ABC system (periplasm)	atp[c] + h2o[c] + pentso3[p] --> adp[c] + h[c] + pentso3[c] + pi[c]	Transport		( SsuA (PP_0237) and SsuB (PP_0240) and SsuC (PP_0239) ) or ( TauA (PP_0233) and TauB (PP_0232) and TauC (PP_0231) )	( ( PP_0237 and PP_0240 and PP_0239 ) or ( PP_0233 and PP_0232 and PP_0231 ) )	( SsuA and SsuB and SsuC ) or ( TauA and TauB and TauC )	0	0	1000
CO2tpp	CO2 transporter via diffusion (periplasm)	co2[p] <==> co2[c]	Transport					0	-1000	1000
O2tex	oxygen transport via diffusion (extracellular to periplasm)	o2[e] <==> o2[p]	Transport					0	-1000	1000
ACGK	acetylglutamate kinase	[c] : acglu + atp --> acg5p + adp	Urea cycle/amino group metabolism	2.7.2.8	ArgB (PP_5289)	PP_5289	ArgB	0	0	1000
ACGS	N-acetylglutamate synthase	[c] : accoa + glu-L --> acglu + coa + h	Urea cycle/amino group metabolism	2.3.1.1	( ArgJ (PP_1346) ) or ( ArgA (PP_5185) )	( PP_1346 or PP_5185 )	( ArgJ ) or ( ArgA )	0	0	1000
ACODA	acetylornithine deacetylase	[c] : acorn + h2o --> ac + orn	Urea cycle/amino group metabolism	3.5.1.16	ArgE (PP_5186)	PP_5186	ArgE	0	0	1000
ACOTA	acetylornithine transaminase	[c] : acorn + akg <==> acg5sa + glu-L	Urea cycle/amino group metabolism	2.6.1.11	AruC (PP_4481)	PP_4481	AruC	0	-1000	1000
AGMT	agmatinase	[c] : agm + h2o --> ptrc + urea	Urea cycle/amino group metabolism	3.5.3.11	SpeB (PP_2196)	PP_2196	SpeB	0	0	1000
AGPR	N-acetyl-g-glutamyl-phosphate reductase	[c] : acg5sa + nadp + pi <==> acg5p + h + nadph	Urea cycle/amino group metabolism	1.2.1.38	ArgC (PP_3633)	PP_3633	ArgC	0	-1000	1000
GLU5K	glutamate 5-kinase	[c] : atp + glu-L --> adp + glu5p	Urea cycle/amino group metabolism	2.7.2.11	ProB_TM (PP_0691)	PP_0691	ProB_TM	0	0	1000
OCBT	ornithine carbamoyltransferase	[c] : cbp + orn <==> citr-L + h + pi	Urea cycle/amino group metabolism	2.1.3.3	( ArgI (PP_1000) ) or ( ArgF (PP_1079) )	( PP_1000 or PP_1079 )	( ArgI ) or ( ArgF )	0	-1000	1000
ORNDC	Ornithine Decarboxylase	[c] : h + orn --> co2 + ptrc	Urea cycle/amino group metabolism	4.1.1.17	SpeC (PP_0864)	PP_0864	SpeC	0	0	1000
ORNTAC	ornithine transacetylase	[c] : acorn + glu-L <==> acglu + orn	Urea cycle/amino group metabolism	2.3.1.35	ArgJ (PP_1346)	PP_1346	ArgJ	0	-1000	1000
UREA	urease	[c] : (2) h + h2o + urea --> co2 + (2) nh4	Urea cycle/amino group metabolism	3.5.1.5	UreABC ( PP_2843 and PP_2844 and PP_2845 )	( PP_2843 and PP_2844 and PP_2845 )	UreABC	0	0	1000
3HBCOAHL	3-hydroxyisobutyryl-CoA hydrolase, mitochondrial	[c] : 3hibutcoa + h2o --> 3hmp + coa + h	Valine, leucine and isoleucine degradation	3.1.2.4				0	0	1000
ACOADH1	acyl-CoA dehydrogenase 2-Methyl-butanoyl-CoA	[c] : 2mbcoa + fad --> 2mb2coa + fadh2	Valine, leucine and isoleucine degradation	1.3.99.2				0	0	1000
ACOADH2	acyl-CoA dehydrogenase (Isobutiryl-CoA)	[c] : (2) ibcoa + o2 --> (2) 2mp2coa + (2) h2o	Valine, leucine and isoleucine degradation	1.3.99.2				0	0	1000
ECOAH12	3-hydroxyacyl-CoA dehydratase (3-hydroxyisobutyryl-CoA) (mitochondria)	[c] : 2mp2coa + h2o --> 3hibutcoa	Valine, leucine and isoleucine degradation	4.2.1.17				0	0	1000
ECOAH9ir	2-Methylprop-2-enoyl-CoA (2-Methylbut-2-enoyl-CoA)	[c] : 2mb2coa + h2o --> 3hmbcoa	Valine, leucine and isoleucine degradation	4.2.1.17				0	0	1000
HACD9	3-hydroxyacyl-CoA dehydrogenase (2-Methylacetoacetyl-CoA)	[c] : 3hmbcoa + nad <==> 2maacoa + h + nadh	Valine, leucine and isoleucine degradation	1.1.1.35				0	-1000	1000
HIBDkt	3-hydroxyisobutyrate dehydrogenase	[c] : 3hmp + nad --> h + mmtsa + nadh	Valine, leucine and isoleucine degradation	1.1.1.31	MmsB (PP_4666)	PP_4666	MmsB	0	0	1000
ILETA	isoleucine transaminase	[c] : akg + ile-L <==> 3mop + glu-L	Valine, leucine and isoleucine degradation	2.6.1.42	IlvE (PP_3511)	PP_3511	IlvE	0	-1000	1000
LEUTA	leucine transaminase	[c] : akg + leu-L <==> 4mop + glu-L	Valine, leucine and isoleucine degradation	2.6.1.6	IlvE (PP_3511)	PP_3511	IlvE	0	-1000	1000
MACCOAT	2-Methylacetyl-CoA thiolase	[c] : 2maacoa + coa --> accoa + ppcoa	Valine, leucine and isoleucine degradation	2.3.1.16				0	0	1000
MBCOAi	3-Methylbutanoyl-CoA:(acceptor) 2,3-oxidoreductase	[c] : fad + ivcoa --> 3mb2coa + fadh2	Valine, leucine and isoleucine degradation		Ivd-kt (PP_4064)	PP_4064	Ivd-kt	0	0	1000
MCCC	methylcrotonoyl-CoA carboxylase	[c] : 3mb2coa + atp + hco3 --> 3mgcoa + adp + h + pi	Valine, leucine and isoleucine degradation	6.4.1.4				0	0	1000
MGCH	methylglutaconyl-CoA hydratase	[c] : 3mgcoa + h2o --> hmgcoa	Valine, leucine and isoleucine degradation	4.2.1.18				0	0	1000
MMTSAO	(S)-Methylmalonate semialdehyde:NAD+ oxidoreductase (CoA-propanoylating)	[c] : coa + mmtsa + nad --> co2 + nadh + ppcoa	Valine, leucine and isoleucine degradation	1.2.1.27	( MmsA-kt1 (PP_0597) ) or ( MmsA-kt2 (PP_4667) )	( PP_0597 or PP_4667 )	( MmsA-kt1 ) or ( MmsA-kt2 )	0	0	1000
OIVD1	2-oxoisovalerate dehydrogenase (acylating; 4-methyl-2-oxopentaoate)	[c] : 4mop + coa + nad <==> co2 + ivcoa + nadh	Valine, leucine and isoleucine degradation	1.2.1.25	( BkdA ( PP_4401 and PP_4402 ) and BkdB (PP_4403) and LpdV (PP_4404) )	( ( PP_4401 and PP_4402 ) and PP_4403 and PP_4404 )	( BkdA and BkdB and LpdV )	0	-1000	1000
OIVD2	2-oxoisovalerate dehydrogenase (acylating; 3-methyl-2-oxobutanoate)	[c] : 3mob + coa + nad --> co2 + ibcoa + nadh	Valine, leucine and isoleucine degradation	1.2.1.25	( BkdA ( PP_4401 and PP_4402 ) and BkdB (PP_4403) and LpdV (PP_4404) )	( ( PP_4401 and PP_4402 ) and PP_4403 and PP_4404 )	( BkdA and BkdB and LpdV )	0	0	1000
OIVD3	2-oxoisovalerate dehydrogenase (acylating; 3-methyl-2-oxopentanoate)	[c] : 3mop + coa + nad --> 2mbcoa + co2 + nadh	Valine, leucine and isoleucine degradation	1.2.1.25	( BkdA ( PP_4401 and PP_4402 ) and BkdB (PP_4403) and LpdV (PP_4404) )	( ( PP_4401 and PP_4402 ) and PP_4403 and PP_4404 )	( BkdA and BkdB and LpdV )	0	0	1000
VALTA	valine transaminase	[c] : akg + val-L <==> 3mob + glu-L	Valine, leucine and isoleucine degradation	2.6.1.42	IlvE (PP_3511)	PP_3511	IlvE	0	-1000	1000
ACHBS	2-aceto-2-hydroxybutanoate synthase	[c] : 2obut + h + pyr --> 2ahbut + co2	Valine, Leucine, and Isoleucine Metabolism		IlvBN ( PP_4679 and PP_4680 )	( PP_4679 and PP_4680 )	IlvBN	0	0	1000
DHAD2	Dihydroxy-acid dehydratase (2,3-dihydroxy-3-methylpentanoate)	[c] : 23dhmp --> 3mop + h2o	Valine, Leucine, and Isoleucine Metabolism		IlvD (PP_5128)	PP_5128	IlvD	0	0	1000
ILETRS	Isoleucyl-tRNA synthetase	[c] : atp + ile-L + trnaile --> amp + iletrna + ppi	Valine, Leucine, and Isoleucine Metabolism	6.1.1.5	IleS (PP_0603)	PP_0603	IleS	0	0	1000
IPMDr	3-isopropylmalate dehydrogenase reversible	[c] : 3c2hmp + nad <==> 3c4mop + h + nadh	Valine, Leucine, and Isoleucine Metabolism	1.1.1.85	LeuB (PP_1988)	PP_1988	LeuB	0	-1000	1000
IPPMIa	3-isopropylmalate dehydratase	[c] : 3c2hmp <==> 2ippm + h2o	Valine, Leucine, and Isoleucine Metabolism	4.2.1.33	LeuCD ( PP_1985 and PP_1986 )	( PP_1985 and PP_1986 )	LeuCD	0	-1000	1000
IPPMIb	2-isopropylmalate hydratase	[c] : 2ippm + h2o <==> 3c3hmp	Valine, Leucine, and Isoleucine Metabolism	4.2.1.33	LeuCD ( PP_1985 and PP_1986 )	( PP_1985 and PP_1986 )	LeuCD	0	-1000	1000
IPPS	2-isopropylmalate synthase	[c] : 3mob + accoa + h2o --> 3c3hmp + coa + h	Valine, Leucine, and Isoleucine Metabolism	4.1.3.12	LeuA1 (PP_1025)	PP_1025	LeuA1	0	0	1000
KARA1	ketol-acid reductoisomerase (2,3-dihydroxy-3-methylbutanoate)	[c] : 23dhmb + nadp <==> alac-S + h + nadph	Valine, Leucine, and Isoleucine Metabolism	1.1.1.86	IlvC (PP_4678)	PP_4678	IlvC	0	-1000	1000
KARA2	ketol-acid reductoisomerase (2-Acetolactate)	[c] : 2ahbut + h + nadph <==> 23dhmp + nadp	Valine, Leucine, and Isoleucine Metabolism	1.1.1.86	IlvC (PP_4678)	PP_4678	IlvC	0	-1000	1000
LEUTRS	Leucyl-tRNA synthetase	[c] : atp + leu-L + trnaleu --> amp + leutrna + ppi	Valine, Leucine, and Isoleucine Metabolism	6.1.1.4	LeuS (PP_4794)	PP_4794	LeuS	0	0	1000
OMCDC	2-Oxo-4-methyl-3-carboxypentanoate decarboxylation	[c] : 3c4mop + h --> 4mop + co2	Valine, Leucine, and Isoleucine Metabolism					0	0	1000
VALTRS	Valyl-tRNA synthetase	[c] : atp + trnaval + val-L --> amp + ppi + valtrna	Valine, Leucine, and Isoleucine Metabolism	6.1.1.9	ValS (PP_0977)	PP_0977	ValS	0	0	1000
4HTHRS	4-Hydroxy-L-threonine synthase	[c] : h2o + phthr --> 4hthr + pi	Vitamin B6 Metabolism		ThrC (PP_1471)	PP_1471	ThrC	0	0	1000
E4PD	Erythrose 4-phosphate dehydrogenase	[c] : e4p + h2o + nad <==> 4per + (2) h + nadh	Vitamin B6 Metabolism		Epd (PP_4964)	PP_4964	Epd	0	-1000	1000
OHPBAT	O-Phospho-4-hydroxy-L-threonine:2-oxoglutarate aminotransferase	[c] : glu-L + ohpb <==> akg + phthr	Vitamin B6 Metabolism	2.6.1.52	SerC (PP_1768)	PP_1768	SerC	0	-1000	1000
PDX5POi	pyridoxine 5'-phosphate oxidase	[c] : o2 + pdx5p --> h2o2 + pydx5p	Vitamin B6 Metabolism	1.4.3.5	PdxH (PP_1129)	PP_1129	PdxH	0	0	1000
PDX5PS	Pyridoxine 5'-phosphate synthase	[c] : dxyl5p + nad + phthr --> co2 + h + (2) h2o + nadh + pdx5p + pi	Vitamin B6 Metabolism		PdxAJ ( PP_0402 and PP_1436 )	( PP_0402 and PP_1436 )	PdxAJ	0	0	1000
PDXPP	Pyridoxine 5-phosphate phosphatase	[c] : h2o + pdx5p --> pi + pydxn	Vitamin B6 Metabolism		PkxY (PP_5357)	PP_5357	PkxY	0	0	1000
PERD	Erythronate 4-phosphate (4per) dehydrogenase	[c] : 4per + nad <==> h + nadh + ohpb	Vitamin B6 Metabolism		PdxB (PP_2117)	PP_2117	PdxB	0	-1000	1000
PYDXPP	Pyridoxal 5-phosphate phosphatase	[c] : h2o + pydx5p --> pi + pydx	Vitamin B6 Metabolism		PkxY (PP_5357)	PP_5357	PkxY	0	0	1000
AKGDH	2-Oxogluterate dehydrogenase	[c] : akg + coa + nad --> co2 + nadh + succoa			( Kgd1-c (PP_4189) and Kgd2-c (PP_4188) and Lpd (PP_4187) )	( PP_4189 and PP_4188 and PP_4187 )	( Kgd1-c and Kgd2-c and Lpd )	0	0	1000
ALCD2ir	alcohol dehydrogenase, reverse rxn (acetaldehyde -> ethanol)	[c] : acald + h + nadh --> etoh + nad		1.1.1.1	AdhP (PP_3839)	PP_3839	AdhP	0	0	1000
ALCDkt	alcohol dehydrogenase, forward rxn (ethanol -> acetaldehyde)	[c] : etoh + pqq --> acald + pqqh2		1.1.1.1	QedH (PP_2674)	PP_2674	QedH	0	0	1000
ALDD2x	aldehyde dehydrogenase (acetaldehyde, NAD)	[c] : acald + h2o + nad --> ac + (2) h + nadh		1.2.1.3	( AldD-kt1 (PP_0545) ) or ( AldD-kt3 (PP_2680) ) or ( AldD-kt2 (PP_2589) ) or ( AldD-kt4 (PP_2694) ) or ( AldD-kt5 (PP_3463) ) or ( AldD-kt6 (PP_5258) )	( PP_0545 or PP_2680 or PP_2589 or PP_2694 or PP_3463 or PP_5258 )	( AldD-kt1 ) or ( AldD-kt3 ) or ( AldD-kt2 ) or ( AldD-kt4 ) or ( AldD-kt5 ) or ( AldD-kt6 )	0	0	1000
ALDD2xr	aldehyde dehydrogenase (acetaldehyde, NAD)	[c] : acald + h2o + nad <==> ac + (2) h + nadh		1.2.1.3	AldD-kt1 (PP_0545)	PP_0545	AldD-kt1	0	-1000	1000
BiomassKT_TEMP2	BiomassKT_TEMP2 (based on Ecoli, arbitrary values for lipids, heme and peptidoglycan.)	[c] : (0.05) 5mthf + (0.00005) accoa + (0.488) ala-L + (0.001) amp + (0.281) arg-L + (0.229) asn-L + (0.229) asp-L + (45.7318) atp + (0.0005) clpn120 + (0.0005) clpn160 + (0.0005) clpn161 + (0.0005) clpn180 + (0.0005) clpn181 + (0.000006) coa + (0.0005) cpe160 + (0.0005) cpe180 + (0.0005) cpg160 + (0.0005) cpg180 + (0.126) ctp + (0.087) cys-L + (0.0247) datp + (0.0254) dctp + (0.0254) dgtp + (0.0…						0	0	1000
CRNtex	L-carnitine transport via diffusion (extracellular to periplasm)	crn[e] <==> crn[p]						0	-1000	1000
H2CO3D2	carboxylic acid dissociation	[c] : h + hco3 <==> h2co3						0	-1000	1000
HCO3E	HCO3 equilibration reaction	[c] : co2 + h2o <==> h + hco3		4.2.1.1				0	-1000	1000
NNDMBRT	Nicotinate-nucleotide dimethylbenzimidazole phosphoribosyltransferase	[c] : dmbzid + nicrnt --> 5prdmbz + h + nac			CobT (PP_1679)	PP_1679	CobT	0	0	1000
PMPK	phosphomethylpyrimidine kinase	[c] : 4ampm + atp --> 2mahmp + adp		2.7.4.7	ThiD (PP_4782)	PP_4782	ThiD	0	0	1000
SUCD1	succinate dehydrogenase	[c] : fad + succ <==> fadh2 + fum		1.3.99.1	SdhABCD ( PP_4190 and PP_4191 and PP_4192 and PP_4193 )	( PP_4190 and PP_4191 and PP_4192 and PP_4193 )	SdhABCD	0	-1000	1000
SUCDi	succinate dehydrogenase (irreversible)	[c] : q8 + succ --> fum + q8h2		1.3.99.1	SdhABCD ( PP_4190 and PP_4191 and PP_4192 and PP_4193 )	( PP_4190 and PP_4191 and PP_4192 and PP_4193 )	SdhABCD	0	0	1000
Ec_biomass_iJO1366_core_53p95M	E. coli biomass objective function (iJO1366) - core - with 53.95 GAM estimate	0.000223 10fthf[c] + 2.6e-005 2fe2s[c] + 0.000223 2ohph[c] + 0.00026 4fe4s[c] + 0.51369 ala-L[c] + 0.000223 amet[c] + 0.29579 arg-L[c] + 0.24105 asn-L[c] + 0.24105 asp-L[c] + 54.1248 atp[c] + 0.000122 bmocogdp[c] + 2e-006 btn[c] + 0.005205 ca2[c] + 0.005205 cl[c] + 0.000576 coa[c] + 2.5e-005 cobalt2[c] + 0.13351 ctp[c] + 0.000709 cu2[c] + 0.09158 cys-L[c] + 0.026166 datp[c] + 0.027017 dctp[c] + 0…						0	0	0
ATP_maintenance	ATP_maintenance	atp[c] --> adp[c] + pi[c]						1	0	100000

## Sheet: experiments
type	abbreviation	official name	equation	subsystem	EC number	protein gene association	gene association	protein association	obj_coef	lowbnd	uppbnd
control	EX_2ddglcn(e)	2-Dehydro-3-deoxy-D-gluconate exchange	[e] : 2ddglcn <==>						0	0	1000
control	EX_2dhglcn(e)	2-Dehydro-D-gluconate exchange	[e] : 2dhglcn <==>						0	0	1000
control	EX_34dhbz(e)	3,4-Dihydroxybenzoate exchange	[e] : 34dhbz <==>						0	0	1000
control	EX_34dhcinm(e)	3,4-Dihydroxy-trans-cinnamate exchange	[e] : 34dhcinm <==>						0	0	1000
control	EX_3oxoadp(e)	3-Oxoadipate exchange	[e] : 3oxoadp <==>						0	0	1000
control	EX_4abut(e)	4-Aminobutanoate exchange	[e] : 4abut <==>						0	0	1000
control	EX_4hbz(e)	4-Hydroxybenzoate exchange	[e] : 4hbz <==>						0	0	1000
control	EX_T4hcinnm(e)	trans-4-Hydroxycinnamate exchange	[e] : T4hcinnm <==>						0	0	1000
control	EX_ac(e)	Acetate exchange	[e] : ac <==>						0	0	1000
control	EX_acon-C(e)	cis-Aconitate exchange	[e] : acon-C <==>						0	-1000	1000
control	EX_akg(e)	2-Oxoglutarate exchange	[e] : akg <==>						0	0	1000
control	EX_ala-L(e)	L-Alanine exchange	[e] : ala-L <==>						0	0	1000
control	EX_arg-L(e)	L-Arginine exchange	[e] : arg-L <==>						0	0	1000
control	EX_asp-L(e)	L-Aspartate exchange	[e] : asp-L <==>						0	0	1000
control	EX_bz(e)	Benzoate exchange	[e] : bz <==>						0	0	1000
control	EX_catechol(e)	Catechol exchange	[e] : catechol <==>						0	0	1000
control	EX_chol(e)	Choline exchange	[e] : chol <==>						0	0	1000
control	EX_chols(e)	Choline sulfate exchange	[e] : chols <==>						0	-1000	1000
control	EX_cit(e)	Citrate exchange	[e] : cit <==>						0	0	1000
control	EX_co2(e)	CO2 exchange	[e] : co2 <==>						0	0	1000
control	EX_cobalt2(e)	Co2+ exchange	[e] : cobalt2 <==>						0	-1000	1000
control	EX_confrl(e)	Coniferol exchange	[e] : confrl <==>						0	0	1000
control	EX_crn(e)	L-Carnitine exchange	[e] : crn <==>						0	0	1000
control	EX_cys-L(e)	L-Cysteine exchange	[e] : cys-L <==>						0	0	1000
control	EX_dca(e)	Decanoate (n-C10:0) exchange	[e] : dca <==>						0	0	1000
control	EX_ddca(e)	Dodecanoate (n-C12:0) exchange	[e] : ddca <==>						0	0	1000
control	EX_ethso3(e)	ethanesulfonate exchange	[e] : ethso3 <==>						0	0	1000
control	EX_fe2(e)	Fe2+ exchange	[e] : fe2 <==>						0	-1000	1000
control	EX_fer(e)	Ferulate exchange	[e] : fer <==>						0	0	1000
control	EX_fru(e)	D-Fructose exchange	[e] : fru <==>						0	0	1000
control	EX_fum(e)	Fumarate exchange	[e] : fum <==>						0	0	1000
control	EX_ga(e)	Gallic acid exchange	[e] : ga <==>						0	0	1000
control	EX_glc(e)	D-Glucose exchange	[e] : glc-D <==>						0	-10	1000
control	EX_glcn(e)	D-Gluconate exchange	[e] : glcn <==>						0	0	1000
control	EX_glu-L(e)	L-Glutamate exchange	[e] : glu-L <==>						0	0	1000
control	EX_gly(e)	Glycine exchange	[e] : gly <==>						0	0	1000
control	EX_glyald(e)	D-Glyceraldehyde exchange	[e] : glyald <==>						0	0	1000
control	EX_glyb(e)	Glycine betaine exchange	[e] : glyb <==>						0	0	1000
control	EX_glyc(e)	Glycerol exchange	[e] : glyc <==>						0	0	1000
control	EX_glyclt(e)	Glycolate exchange	[e] : glyclt <==>						0	0	1000
control	EX_h(e)	H+ exchange	[e] : h <==>						0	0	1000
control	EX_h2(e)	H2 exchange	[e] : h2 <==>						0	0	1000
control	EX_h2o(e)	H2O exchange	[e] : h2o <==>						0	-1000	1000
control	EX_hco3(e)	Bicarbonate exchange	[e] : hco3 <==>						0	-1000	1000
control	EX_hdca(e)	Hexadecanoate (n-C16:0) exchange	[e] : hdca <==>						0	0	1000
control	EX_his-L(e)	L-Histidine exchange	[e] : his-L <==>						0	0	1000
control	EX_hxa(e)	Hexanoate (n-C6:0) exchange	[e] : hxa <==>						0	0	1000
control	EX_icit(e)	Isocitrate exchange	[e] : icit <==>						0	0	1000
control	EX_ile-L(e)	L-Isoleucine exchange	[e] : ile-L <==>						0	0	1000
control	EX_isetac(e)	Isethionic acid exchange	[e] : isetac <==>						0	0	1000
control	EX_lac-D(e)	D-lactate exchange	[e] : lac-D <==>						0	0	1000
control	EX_lac-L(e)	L-Lactate exchange	[e] : lac-L <==>						0	0	1000
control	EX_leu-L(e)	L-Leucine exchange	[e] : leu-L <==>						0	0	1000
control	EX_lys-L(e)	L-Lysine exchange	[e] : lys-L <==>						0	0	1000
control	EX_m-xyl(e)	m-Xylene exchange	[e] : m-xyl <==>						0	0	1000
control	EX_mal-L(e)	L-Malate exchange	[e] : mal-L <==>						0	0	1000
control	EX_met-L(e)	L-Methionine exchange	[e] : met-L <==>						0	0	1000
control	EX_mso3(e)	methanesulfonate exchange	[e] : mso3 <==>						0	0	1000
control	EX_na1(e)	Sodium exchange	[e] : na1 <==>						0	-1000	1000
control	EX_nac(e)	Nicotinate exchange	[e] : nac <==>						0	0	1000
control	EX_nh4(e)	Ammonia exchange	[e] : nh4 <==>						0	0	1000
control	EX_ni2(e)	Ni2+ exchange	[e] : ni2 <==>						0	-1000	1000
control	EX_no2(e)	Nitrite exchange	[e] : no2 <==>						0	0	1000
control	EX_o2(e)	O2 exchange	[e] : o2 <==>						0	-1000	1000
control	EX_octa(e)	octanoate (n-C8:0) exchange	[e] : octa <==>						0	0	1000
control	EX_orn(e)	Ornithine exchange	[e] : orn <==>						0	0	1000
control	EX_p-xyl(e)	p-methyltoluene exchange	[e] : p-xyl <==>						0	-1000	1000
control	EX_pac(e)	Phenylacetic acid exchange	[e] : pac <==>						0	0	1000
control	EX_pentso3(e)	pentanesulfonate exchange	[e] : pentso3 <==>						0	-1000	1000
control	EX_phe-L(e)	L-Phenylalanine exchange	[e] : phe-L <==>						0	0	1000
control	EX_pi(e)	Phosphate exchange	[e] : pi <==>						0	-1000	1000
control	EX_ppa(e)	Propionate exchange	[e] : ppa <==>						0	0	1000
control	EX_pro-L(e)	L-Proline exchange	[e] : pro-L <==>						0	0	1000
control	EX_ptrc(e)	Putrescine exchange	[e] : ptrc <==>						0	0	1000
control	EX_quin-kt(e)	Quinate exchange	[e] : quin-kt <==>						0	-1000	1000
control	EX_rib-D(e)	D-Ribose exchange	[e] : rib-D <==>						0	0	1000
control	EX_ser-L(e)	L-Serine exchange	[e] : ser-L <==>						0	0	1000
control	EX_so4(e)	Sulfate exchange	[e] : so4 <==>						0	-1000	1000
control	EX_spmd(e)	Spermidine exchange	[e] : spmd <==>						0	0	1000
control	EX_succ(e)	Succinate exchange	[e] : succ <==>						0	0	1000
control	EX_taur(e)	Taurine exchange	[e] : taur <==>						0	0	1000
control	EX_thr-L(e)	L-Threonine exchange	[e] : thr-L <==>						0	0	1000
control	EX_tol(e)	Toluene exchange	[e] : tol <==>						0	0	1000
control	EX_tsul(e)	Thiosulfate exchange	[e] : tsul <==>						0	0	1000
control	EX_ttdca(e)	tetradecanoate (n-C14:0) exchange	[e] : ttdca <==>						0	0	1000
control	EX_tyr-L(e)	L-Tyrosine exchange	[e] : tyr-L <==>						0	0	1000
control	EX_val-L(e)	L-Valine exchange	[e] : val-L <==>						0	0	1000
control	EX_vanln(e)	Vanillin exchange	[e] : vanln <==>						0	0	1000
control	EX_vanlt(e)	Vanillate exchange	[e] : vanlt <==>						0	-1000	1000
diesel	EX_2ddglcn(e)	2-Dehydro-3-deoxy-D-gluconate exchange	[e] : 2ddglcn <==>						0	0	1000
diesel	EX_2dhglcn(e)	2-Dehydro-D-gluconate exchange	[e] : 2dhglcn <==>						0	0	1000
diesel	EX_34dhbz(e)	3,4-Dihydroxybenzoate exchange	[e] : 34dhbz <==>						0	0	1000
diesel	EX_34dhcinm(e)	3,4-Dihydroxy-trans-cinnamate exchange	[e] : 34dhcinm <==>						0	0	1000
diesel	EX_3oxoadp(e)	3-Oxoadipate exchange	[e] : 3oxoadp <==>						0	0	1000
diesel	EX_4abut(e)	4-Aminobutanoate exchange	[e] : 4abut <==>						0	0	1000
diesel	EX_4hbz(e)	4-Hydroxybenzoate exchange	[e] : 4hbz <==>						0	0	1000
diesel	EX_T4hcinnm(e)	trans-4-Hydroxycinnamate exchange	[e] : T4hcinnm <==>						0	0	1000
diesel	EX_ac(e)	Acetate exchange	[e] : ac <==>						0	0	1000
diesel	EX_acon-C(e)	cis-Aconitate exchange	[e] : acon-C <==>						0	-1000	1000
diesel	EX_akg(e)	2-Oxoglutarate exchange	[e] : akg <==>						0	0	1000
diesel	EX_ala-L(e)	L-Alanine exchange	[e] : ala-L <==>						0	0	1000
diesel	EX_arg-L(e)	L-Arginine exchange	[e] : arg-L <==>						0	0	1000
diesel	EX_asp-L(e)	L-Aspartate exchange	[e] : asp-L <==>						0	0	1000
diesel	EX_bz(e)	Benzoate exchange	[e] : bz <==>						0	0	1000
diesel	EX_catechol(e)	Catechol exchange	[e] : catechol <==>						0	0	1000
diesel	EX_chol(e)	Choline exchange	[e] : chol <==>						0	0	1000
diesel	EX_chols(e)	Choline sulfate exchange	[e] : chols <==>						0	-1000	1000
diesel	EX_cit(e)	Citrate exchange	[e] : cit <==>						0	0	1000
diesel	EX_co2(e)	CO2 exchange	[e] : co2 <==>						0	0	1000
diesel	EX_cobalt2(e)	Co2+ exchange	[e] : cobalt2 <==>						0	-1000	1000
diesel	EX_confrl(e)	Coniferol exchange	[e] : confrl <==>						0	0	1000
diesel	EX_crn(e)	L-Carnitine exchange	[e] : crn <==>						0	0	1000
diesel	EX_cys-L(e)	L-Cysteine exchange	[e] : cys-L <==>						0	0	1000
diesel	EX_dca(e)	Decanoate (n-C10:0) exchange	[e] : dca <==>						0	0	1000
diesel	EX_ddca(e)	Dodecanoate (n-C12:0) exchange	[e] : ddca <==>						0	0	1000
diesel	EX_ethso3(e)	ethanesulfonate exchange	[e] : ethso3 <==>						0	0	1000
diesel	EX_fe2(e)	Fe2+ exchange	[e] : fe2 <==>						0	-1000	1000
diesel	EX_fer(e)	Ferulate exchange	[e] : fer <==>						0	0	1000
diesel	EX_fru(e)	D-Fructose exchange	[e] : fru <==>						0	0	1000
diesel	EX_fum(e)	Fumarate exchange	[e] : fum <==>						0	0	1000
diesel	EX_ga(e)	Gallic acid exchange	[e] : ga <==>						0	0	1000
diesel	EX_glc(e)	D-Glucose exchange	[e] : glc-D <==>						0	0	1000
diesel	EX_glcn(e)	D-Gluconate exchange	[e] : glcn <==>						0	0	1000
diesel	EX_glu-L(e)	L-Glutamate exchange	[e] : glu-L <==>						0	0	1000
diesel	EX_gly(e)	Glycine exchange	[e] : gly <==>						0	0	1000
diesel	EX_glyald(e)	D-Glyceraldehyde exchange	[e] : glyald <==>						0	0	1000
diesel	EX_glyb(e)	Glycine betaine exchange	[e] : glyb <==>						0	0	1000
diesel	EX_glyc(e)	Glycerol exchange	[e] : glyc <==>						0	0	1000
diesel	EX_glyclt(e)	Glycolate exchange	[e] : glyclt <==>						0	0	1000
diesel	EX_h(e)	H+ exchange	[e] : h <==>						0	0	1000
diesel	EX_h2(e)	H2 exchange	[e] : h2 <==>						0	0	1000
diesel	EX_h2o(e)	H2O exchange	[e] : h2o <==>						0	-1000	1000
diesel	EX_hco3(e)	Bicarbonate exchange	[e] : hco3 <==>						0	-1000	1000
diesel	EX_hdca(e)	Hexadecanoate (n-C16:0) exchange	[e] : hdca <==>						0	0	1000
diesel	EX_his-L(e)	L-Histidine exchange	[e] : his-L <==>						0	0	1000
diesel	EX_hxa(e)	Hexanoate (n-C6:0) exchange	[e] : hxa <==>						0	0	1000
diesel	EX_icit(e)	Isocitrate exchange	[e] : icit <==>						0	0	1000
diesel	EX_ile-L(e)	L-Isoleucine exchange	[e] : ile-L <==>						0	0	1000
diesel	EX_isetac(e)	Isethionic acid exchange	[e] : isetac <==>						0	0	1000
diesel	EX_lac-D(e)	D-lactate exchange	[e] : lac-D <==>						0	0	1000
diesel	EX_lac-L(e)	L-Lactate exchange	[e] : lac-L <==>						0	0	1000
diesel	EX_leu-L(e)	L-Leucine exchange	[e] : leu-L <==>						0	0	1000
diesel	EX_lys-L(e)	L-Lysine exchange	[e] : lys-L <==>						0	0	1000
diesel	EX_m-xyl(e)	m-Xylene exchange	[e] : m-xyl <==>						0	0	1000
diesel	EX_mal-L(e)	L-Malate exchange	[e] : mal-L <==>						0	0	1000
diesel	EX_met-L(e)	L-Methionine exchange	[e] : met-L <==>						0	0	1000
diesel	EX_mso3(e)	methanesulfonate exchange	[e] : mso3 <==>						0	0	1000
diesel	EX_na1(e)	Sodium exchange	[e] : na1 <==>						0	-1000	1000
diesel	EX_nac(e)	Nicotinate exchange	[e] : nac <==>						0	0	1000
diesel	EX_nh4(e)	Ammonia exchange	[e] : nh4 <==>						0	0	1000
diesel	EX_ni2(e)	Ni2+ exchange	[e] : ni2 <==>						0	-1000	1000
diesel	EX_no2(e)	Nitrite exchange	[e] : no2 <==>						0	0	1000
diesel	EX_o2(e)	O2 exchange	[e] : o2 <==>						0	-1000	1000
diesel	EX_octa(e)	octanoate (n-C8:0) exchange	[e] : octa <==>						0	0	1000
diesel	EX_orn(e)	Ornithine exchange	[e] : orn <==>						0	0	1000
diesel	EX_p-xyl(e)	p-methyltoluene exchange	[e] : p-xyl <==>						0	-1000	1000
diesel	EX_pac(e)	Phenylacetic acid exchange	[e] : pac <==>						0	0	1000
diesel	EX_pentso3(e)	pentanesulfonate exchange	[e] : pentso3 <==>						0	-1000	1000
diesel	EX_phe-L(e)	L-Phenylalanine exchange	[e] : phe-L <==>						0	0	1000
diesel	EX_pi(e)	Phosphate exchange	[e] : pi <==>						0	-1000	1000
diesel	EX_ppa(e)	Propionate exchange	[e] : ppa <==>						0	0	1000
diesel	EX_pro-L(e)	L-Proline exchange	[e] : pro-L <==>						0	0	1000
diesel	EX_ptrc(e)	Putrescine exchange	[e] : ptrc <==>						0	0	1000
diesel	EX_quin-kt(e)	Quinate exchange	[e] : quin-kt <==>						0	-1000	1000
diesel	EX_rib-D(e)	D-Ribose exchange	[e] : rib-D <==>						0	0	1000
diesel	EX_ser-L(e)	L-Serine exchange	[e] : ser-L <==>						0	0	1000
diesel	EX_so4(e)	Sulfate exchange	[e] : so4 <==>						0	-1000	1000
diesel	EX_spmd(e)	Spermidine exchange	[e] : spmd <==>						0	0	1000
diesel	EX_succ(e)	Succinate exchange	[e] : succ <==>						0	0	1000
diesel	EX_taur(e)	Taurine exchange	[e] : taur <==>						0	0	1000
diesel	EX_thr-L(e)	L-Threonine exchange	[e] : thr-L <==>						0	0	1000
diesel	EX_tol(e)	Toluene exchange	[e] : tol <==>						0	-10	1000
diesel	EX_tsul(e)	Thiosulfate exchange	[e] : tsul <==>						0	0	1000
diesel	EX_ttdca(e)	tetradecanoate (n-C14:0) exchange	[e] : ttdca <==>						0	0	1000
diesel	EX_tyr-L(e)	L-Tyrosine exchange	[e] : tyr-L <==>						0	0	1000
diesel	EX_val-L(e)	L-Valine exchange	[e] : val-L <==>						0	0	1000
diesel	EX_vanln(e)	Vanillin exchange	[e] : vanln <==>						0	0	1000
diesel	EX_vanlt(e)	Vanillate exchange	[e] : vanlt <==>						0	-1000	1000
	EX_2ddglcn(e)	2-Dehydro-3-deoxy-D-gluconate exchange	[e] : 2ddglcn <==>						0	0	1000
	EX_2dhglcn(e)	2-Dehydro-D-gluconate exchange	[e] : 2dhglcn <==>						0	-1000	1000
	EX_34dhbz(e)	3,4-Dihydroxybenzoate exchange	[e] : 34dhbz <==>						0	-1000	1000
	EX_34dhcinm(e)	3,4-Dihydroxy-trans-cinnamate exchange	[e] : 34dhcinm <==>						0	-1000	1000
	EX_3oxoadp(e)	3-Oxoadipate exchange	[e] : 3oxoadp <==>						0	-1000	1000
	EX_4abut(e)	4-Aminobutanoate exchange	[e] : 4abut <==>						0	0	1000
	EX_4hbz(e)	4-Hydroxybenzoate exchange	[e] : 4hbz <==>						0	-1000	1000
	EX_T4hcinnm(e)	trans-4-Hydroxycinnamate exchange	[e] : T4hcinnm <==>						0	-1000	1000
	EX_ac(e)	Acetate exchange	[e] : ac <==>						0	0	1000
	EX_acon-C(e)	cis-Aconitate exchange	[e] : acon-C <==>						0	-1000	1000
	EX_akg(e)	2-Oxoglutarate exchange	[e] : akg <==>						0	0	1000
	EX_ala-L(e)	L-Alanine exchange	[e] : ala-L <==>						0	0	1000
	EX_arg-L(e)	L-Arginine exchange	[e] : arg-L <==>						0	0	1000
	EX_asp-L(e)	L-Aspartate exchange	[e] : asp-L <==>						0	0	1000
	EX_bz(e)	Benzoate exchange	[e] : bz <==>						0	-1000	1000
	EX_catechol(e)	Catechol exchange	[e] : catechol <==>						0	-1000	1000
	EX_chol(e)	Choline exchange	[e] : chol <==>						0	0	1000
	EX_chols(e)	Choline sulfate exchange	[e] : chols <==>						0	-1000	1000
	EX_cit(e)	Citrate exchange	[e] : cit <==>						0	0	1000
	EX_co2(e)	CO2 exchange	[e] : co2 <==>						0	-1000	1000
	EX_cobalt2(e)	Co2+ exchange	[e] : cobalt2 <==>						0	-1000	1000
	EX_confrl(e)	Coniferol exchange	[e] : confrl <==>						0	-1000	1000
	EX_crn(e)	L-Carnitine exchange	[e] : crn <==>						0	0	1000
	EX_cys-L(e)	L-Cysteine exchange	[e] : cys-L <==>						0	0	1000
	EX_dca(e)	Decanoate (n-C10:0) exchange	[e] : dca <==>						0	0	1000
	EX_ddca(e)	Dodecanoate (n-C12:0) exchange	[e] : ddca <==>						0	0	1000
	EX_ethso3(e)	ethanesulfonate exchange	[e] : ethso3 <==>						0	0	1000
	EX_fe2(e)	Fe2+ exchange	[e] : fe2 <==>						0	-1000	1000
	EX_fer(e)	Ferulate exchange	[e] : fer <==>						0	-1000	1000
	EX_fru(e)	D-Fructose exchange	[e] : fru <==>						0	0	1000
	EX_fum(e)	Fumarate exchange	[e] : fum <==>						0	0	1000
	EX_ga(e)	Gallic acid exchange	[e] : ga <==>						0	-1000	1000
	EX_glc(e)	D-Glucose exchange	[e] : glc-D <==>						0	-10	1000
	EX_glcn(e)	D-Gluconate exchange	[e] : glcn <==>						0	0	1000
	EX_glu-L(e)	L-Glutamate exchange	[e] : glu-L <==>						0	0	1000
	EX_gly(e)	Glycine exchange	[e] : gly <==>						0	0	1000
	EX_glyald(e)	D-Glyceraldehyde exchange	[e] : glyald <==>						0	0	1000
	EX_glyb(e)	Glycine betaine exchange	[e] : glyb <==>						0	0	1000
	EX_glyc(e)	Glycerol exchange	[e] : glyc <==>						0	0	1000
	EX_glyclt(e)	Glycolate exchange	[e] : glyclt <==>						0	0	1000
	EX_h(e)	H+ exchange	[e] : h <==>						0	-1000	1000
	EX_h2(e)	H2 exchange	[e] : h2 <==>						0	0	1000
	EX_h2o(e)	H2O exchange	[e] : h2o <==>						0	-1000	1000
	EX_hco3(e)	Bicarbonate exchange	[e] : hco3 <==>						0	-1000	1000
	EX_hdca(e)	Hexadecanoate (n-C16:0) exchange	[e] : hdca <==>						0	0	1000
	EX_his-L(e)	L-Histidine exchange	[e] : his-L <==>						0	0	1000
	EX_hxa(e)	Hexanoate (n-C6:0) exchange	[e] : hxa <==>						0	0	1000
	EX_icit(e)	Isocitrate exchange	[e] : icit <==>						0	-1000	1000
	EX_ile-L(e)	L-Isoleucine exchange	[e] : ile-L <==>						0	0	1000
	EX_isetac(e)	Isethionic acid exchange	[e] : isetac <==>						0	0	1000
	EX_lac-D(e)	D-lactate exchange	[e] : lac-D <==>						0	0	1000
	EX_lac-L(e)	L-Lactate exchange	[e] : lac-L <==>						0	0	1000
	EX_leu-L(e)	L-Leucine exchange	[e] : leu-L <==>						0	0	1000
	EX_lys-L(e)	L-Lysine exchange	[e] : lys-L <==>						0	0	1000
	EX_m-xyl(e)	m-Xylene exchange	[e] : m-xyl <==>						0	-1000	1000
	EX_mal-L(e)	L-Malate exchange	[e] : mal-L <==>						0	0	1000
	EX_met-L(e)	L-Methionine exchange	[e] : met-L <==>						0	0	1000
	EX_mso3(e)	methanesulfonate exchange	[e] : mso3 <==>						0	0	1000
	EX_na1(e)	Sodium exchange	[e] : na1 <==>						0	-1000	1000
	EX_nac(e)	Nicotinate exchange	[e] : nac <==>						0	0	1000
	EX_nh4(e)	Ammonia exchange	[e] : nh4 <==>						0	-1000	1000
	EX_ni2(e)	Ni2+ exchange	[e] : ni2 <==>						0	-1000	1000
	EX_no2(e)	Nitrite exchange	[e] : no2 <==>						0	0	1000
	EX_o2(e)	O2 exchange	[e] : o2 <==>						0	-1000	1000
	EX_octa(e)	octanoate (n-C8:0) exchange	[e] : octa <==>						0	0	1000
	EX_orn(e)	Ornithine exchange	[e] : orn <==>						0	0	1000
	EX_p-xyl(e)	p-methyltoluene exchange	[e] : p-xyl <==>						0	-1000	1000
	EX_pac(e)	Phenylacetic acid exchange	[e] : pac <==>						0	-1000	1000
	EX_pentso3(e)	pentanesulfonate exchange	[e] : pentso3 <==>						0	-1000	1000
	EX_phe-L(e)	L-Phenylalanine exchange	[e] : phe-L <==>						0	0	1000
	EX_pi(e)	Phosphate exchange	[e] : pi <==>						0	-1000	1000
	EX_ppa(e)	Propionate exchange	[e] : ppa <==>						0	0	1000
	EX_pro-L(e)	L-Proline exchange	[e] : pro-L <==>						0	0	1000
	EX_ptrc(e)	Putrescine exchange	[e] : ptrc <==>						0	0	1000
	EX_quin-kt(e)	Quinate exchange	[e] : quin-kt <==>						0	-1000	1000
	EX_rib-D(e)	D-Ribose exchange	[e] : rib-D <==>						0	0	1000
	EX_ser-L(e)	L-Serine exchange	[e] : ser-L <==>						0	0	1000
	EX_so4(e)	Sulfate exchange	[e] : so4 <==>						0	-1000	1000
	EX_spmd(e)	Spermidine exchange	[e] : spmd <==>						0	0	1000
	EX_succ(e)	Succinate exchange	[e] : succ <==>						0	0	1000
	EX_taur(e)	Taurine exchange	[e] : taur <==>						0	0	1000
	EX_thr-L(e)	L-Threonine exchange	[e] : thr-L <==>						0	0	1000
	EX_tol(e)	Toluene exchange	[e] : tol <==>						0	-1000	1000
	EX_tsul(e)	Thiosulfate exchange	[e] : tsul <==>						0	0	1000
	EX_ttdca(e)	tetradecanoate (n-C14:0) exchange	[e] : ttdca <==>						0	0	1000
	EX_tyr-L(e)	L-Tyrosine exchange	[e] : tyr-L <==>						0	0	1000
	EX_val-L(e)	L-Valine exchange	[e] : val-L <==>						0	0	1000
	EX_vanln(e)	Vanillin exchange	[e] : vanln <==>						0	-1000	1000
	EX_vanlt(e)	Vanillate exchange	[e] : vanlt <==>						0	-1000	1000
