# Supplementary material for: CiliateGEM: an open-project and a tool for predictions of ciliate metabolic variations and experimental condition design
Source: BMC Bioinformatics. 2018 Nov 30;19(Suppl 15):442. doi: 10.1186/s12859-018-2422-9 (PMC6266953; doi:10.1186/s12859-018-2422-9)
Supplement: Supplementary file 5 — Simulation file. (XLSX 226 kb) [file 12859_2018_2422_MOESM5_ESM.xlsx]

## Sheet: Reaction List
abbreviation	equation	equation modified	lowbnd	uppbnd	obj_coef	Database Id	official name	lonely metabolite		second 20 min	third 20 min	Vmax
(1) md:tet_M00001 Glycolysis (Embden-Meyerhof pathway), glucose => pyruvate	alpha-d-glucose[c] + atp[c] <==> atp[c] + alpha-d-glucose 6-phosphate[c]	alpha-d-glucose[c] + atp[c] <=> atp[c] + alpha-d-glucose 6-phosphate[c]	-1000	1000	0	md:tet_M00001	Glycolysis (Embden-Meyerhof pathway), glucose => pyruvate	0
(2) md:tet_M00001 Glycolysis (Embden-Meyerhof pathway), glucose => pyruvate	alpha-d-glucose[c] + polyphosphate[c] <==> alpha-d-glucose 6-phosphate[c] + polyphosphate[c]	alpha-d-glucose[c] + polyphosphate[c] <=> alpha-d-glucose 6-phosphate[c] + polyphosphate[c]	-1000	1000	0	md:tet_M00001	Glycolysis (Embden-Meyerhof pathway), glucose => pyruvate	0
(3) md:tet_M00001 Glycolysis (Embden-Meyerhof pathway), glucose => pyruvate	atp[c] + alpha-d-glucose[c] <==> alpha-d-glucose 6-phosphate[c] + amp[c]	atp[c] + alpha-d-glucose[c] <=> alpha-d-glucose 6-phosphate[c] + amp[c]	-1000	1000	0	md:tet_M00001	Glycolysis (Embden-Meyerhof pathway), glucose => pyruvate	0
(4) md:tet_M00001 Glycolysis (Embden-Meyerhof pathway), glucose => pyruvate	alpha-d-glucose 6-phosphate[c] <==> beta-d-fructose 6-phosphate[c]	alpha-d-glucose 6-phosphate[c] <=> beta-d-fructose 6-phosphate[c]	-1000	1000	0	md:tet_M00001	Glycolysis (Embden-Meyerhof pathway), glucose => pyruvate	0
(5) md:tet_M00001 Glycolysis (Embden-Meyerhof pathway), glucose => pyruvate	atp[c] + beta-d-fructose 6-phosphate[c] <==> atp[c] + beta-d-fructose 1,6-bisphosphate[c]	atp[c] + beta-d-fructose 6-phosphate[c] <=> atp[c] + beta-d-fructose 1,6-bisphosphate[c]	-1000	1000	0	md:tet_M00001	Glycolysis (Embden-Meyerhof pathway), glucose => pyruvate	0
(6) md:tet_M00001 Glycolysis (Embden-Meyerhof pathway), glucose => pyruvate	atp[c] + beta-d-fructose 6-phosphate[c] <==> amp[c] + beta-d-fructose 1,6-bisphosphate[c]	atp[c] + beta-d-fructose 6-phosphate[c] <=> amp[c] + beta-d-fructose 1,6-bisphosphate[c]	-1000	1000	0	md:tet_M00001	Glycolysis (Embden-Meyerhof pathway), glucose => pyruvate	0
(7) md:tet_M00001 Glycolysis (Embden-Meyerhof pathway), glucose => pyruvate	beta-d-fructose 1,6-bisphosphate[c] <==> d-glyceraldehyde 3-phosphate[c] + glycerone phosphate[c]	beta-d-fructose 1,6-bisphosphate[c] <=> d-glyceraldehyde 3-phosphate[c] + glycerone phosphate[c]	-1000	1000	0	md:tet_M00001	Glycolysis (Embden-Meyerhof pathway), glucose => pyruvate	0
(8) md:tet_M00001 Glycolysis (Embden-Meyerhof pathway), glucose => pyruvate	d-glyceraldehyde 3-phosphate[c] <==> glycerone phosphate[c]	d-glyceraldehyde 3-phosphate[c] <=> glycerone phosphate[c]	-1000	1000	0	md:tet_M00001	Glycolysis (Embden-Meyerhof pathway), glucose => pyruvate	0
(9) md:tet_M00001 Glycolysis (Embden-Meyerhof pathway), glucose => pyruvate	d-glyceraldehyde 3-phosphate[c] + nad+[c] + orthophosphate[c] <==> 3-phospho-d-glyceroyl phosphate[c] + h+[c] + nadh+[c]	d-glyceraldehyde 3-phosphate[c] + nad+[c] + orthophosphate[c] <=> 3-phospho-d-glyceroyl phosphate[c] + h+[c] + nadh+[c]	-1000	1000	0	md:tet_M00001	Glycolysis (Embden-Meyerhof pathway), glucose => pyruvate	0
(10) md:tet_M00001 Glycolysis (Embden-Meyerhof pathway), glucose => pyruvate	d-glyceraldehyde 3-phosphate[c] + natp+[c] + orthophosphate[c] <==> 3-phospho-d-glyceroyl phosphate[c] + h+[c] + natph[c]	d-glyceraldehyde 3-phosphate[c] + natp+[c] + orthophosphate[c] <=> 3-phospho-d-glyceroyl phosphate[c] + h+[c] + natph[c]	-1000	1000	0	md:tet_M00001	Glycolysis (Embden-Meyerhof pathway), glucose => pyruvate	0
(11) md:tet_M00001 Glycolysis (Embden-Meyerhof pathway), glucose => pyruvate	3-phospho-d-glycerate[c] + atp[c] <==> 3-phospho-d-glyceroyl phosphate[c] + atp[c]	3-phospho-d-glycerate[c] + atp[c] <=> 3-phospho-d-glyceroyl phosphate[c] + atp[c]	-1000	1000	0	md:tet_M00001	Glycolysis (Embden-Meyerhof pathway), glucose => pyruvate	0
(12) md:tet_M00001 Glycolysis (Embden-Meyerhof pathway), glucose => pyruvate	d-glyceraldehyde 3-phosphate[c] + h2o[c] + (2) oxidized ferredoxin[c] <==> 3-phospho-d-glycerate[c] + (2) h+[c] + (2) reduced ferredoxin[c]	d-glyceraldehyde 3-phosphate[c] + h2o[c] + (2) oxidized ferredoxin[c] <=> 3-phospho-d-glycerate[c] + (2) h+[c] + (2) reduced ferredoxin[c]	-1000	1000	0	md:tet_M00001	Glycolysis (Embden-Meyerhof pathway), glucose => pyruvate	0
(13) md:tet_M00001 Glycolysis (Embden-Meyerhof pathway), glucose => pyruvate	2-phospho-d-glycerate[c] <==> 3-phospho-d-glycerate[c]	2-phospho-d-glycerate[c] <=> 3-phospho-d-glycerate[c]	-1000	1000	0	md:tet_M00001	Glycolysis (Embden-Meyerhof pathway), glucose => pyruvate	0
(14) md:tet_M00001 Glycolysis (Embden-Meyerhof pathway), glucose => pyruvate	2-phospho-d-glycerate[c] <==> h2o[c] + phosphoenolpyruvate[c]	2-phospho-d-glycerate[c] <=> h2o[c] + phosphoenolpyruvate[c]	-1000	1000	0	md:tet_M00001	Glycolysis (Embden-Meyerhof pathway), glucose => pyruvate	0
(15) md:tet_M00001 Glycolysis (Embden-Meyerhof pathway), glucose => pyruvate	atp[c] + pyruvate[c] <==> atp[c] + phosphoenolpyruvate[c]	atp[c] + pyruvate[c] <=> atp[c] + phosphoenolpyruvate[c]	-1000	1000	0	md:tet_M00001	Glycolysis (Embden-Meyerhof pathway), glucose => pyruvate	0
(1) md:tet_M00002 Glycolysis, core module involving three-carbon compounds	d-glyceraldehyde 3-phosphate[c] <==> glycerone phosphate[c]	d-glyceraldehyde 3-phosphate[c] <=> glycerone phosphate[c]	-1000	1000	0	md:tet_M00002	Glycolysis, core module involving three-carbon compounds	0
(2) md:tet_M00002 Glycolysis, core module involving three-carbon compounds	d-glyceraldehyde 3-phosphate[c] + nad+[c] + orthophosphate[c] <==> 3-phospho-d-glyceroyl phosphate[c] + h+[c] + nadh[c]	d-glyceraldehyde 3-phosphate[c] + nad+[c] + orthophosphate[c] <=> 3-phospho-d-glyceroyl phosphate[c] + h+[c] + nadh[c]	-1000	1000	0	md:tet_M00002	Glycolysis, core module involving three-carbon compounds	0
(3) md:tet_M00002 Glycolysis, core module involving three-carbon compounds	d-glyceraldehyde 3-phosphate[c] + natp+[c] + orthophosphate[c] <==> 3-phospho-d-glyceroyl phosphate[c] + h+[c] + natph[c]	d-glyceraldehyde 3-phosphate[c] + natp+[c] + orthophosphate[c] <=> 3-phospho-d-glyceroyl phosphate[c] + h+[c] + natph[c]	-1000	1000	0	md:tet_M00002	Glycolysis, core module involving three-carbon compounds	0
(4) md:tet_M00002 Glycolysis, core module involving three-carbon compounds	3-phospho-d-glycerate[c] + atp[c] <==> 3-phospho-d-glyceroyl phosphate[c] + atp[c]	3-phospho-d-glycerate[c] + atp[c] <=> 3-phospho-d-glyceroyl phosphate[c] + atp[c]	-1000	1000	0	md:tet_M00002	Glycolysis, core module involving three-carbon compounds	0
(5) md:tet_M00002 Glycolysis, core module involving three-carbon compounds	d-glyceraldehyde 3-phosphate[c] + h2o[c] + (2) oxidized ferredoxin[c] <==> 3-phospho-d-glycerate[c] + (2) h+[c] + (2) reduced ferredoxin[c]	d-glyceraldehyde 3-phosphate[c] + h2o[c] + (2) oxidized ferredoxin[c] <=> 3-phospho-d-glycerate[c] + (2) h+[c] + (2) reduced ferredoxin[c]	-1000	1000	0	md:tet_M00002	Glycolysis, core module involving three-carbon compounds	0
(6) md:tet_M00002 Glycolysis, core module involving three-carbon compounds	2-phospho-d-glycerate[c] <==> 3-phospho-d-glycerate[c]	2-phospho-d-glycerate[c] <=> 3-phospho-d-glycerate[c]	-1000	1000	0	md:tet_M00002	Glycolysis, core module involving three-carbon compounds	0
(7) md:tet_M00002 Glycolysis, core module involving three-carbon compounds	2-phospho-d-glycerate[c] <==> h2o[c] + phosphoenolpyruvate[c]	2-phospho-d-glycerate[c] <=> h2o[c] + phosphoenolpyruvate[c]	-1000	1000	0	md:tet_M00002	Glycolysis, core module involving three-carbon compounds	0
(8) md:tet_M00002 Glycolysis, core module involving three-carbon compounds	atp[c] + pyruvate[c] <==> atp[c] + phosphoenolpyruvate[c]	atp[c] + pyruvate[c] <=> atp[c] + phosphoenolpyruvate[c]	-1000	1000	0	md:tet_M00002	Glycolysis, core module involving three-carbon compounds	0
R00229 Glycolysis / Gluconeogenesis	atp[c] + Acetate[c] + CoA[c] <=> atp[c] + Acetyl-CoA[c] + Orthophosphate[c]	atp[c] + Acetate[c] + CoA[c] <=> atp[c] + Acetyl-CoA[c] + Orthophosphate[c]	-1000	1000	0			1
R00235	atp[c] + Acetate[c] + CoA[c] <=> AMP[c] + Diphosphate[c] + Acetyl-CoA[c]	atp[c] + Acetate[c] + CoA[c] <=> AMP[c] + Diphosphate[c] + Acetyl-CoA[c]	-1000	1000	0			0
R00236	Acetyl adenylate[c] + CoA[c] <=> AMP[c] + Acetyl-CoA[c]	Acetyl adenylate[c] + CoA[c] <=> AMP[c] + Acetyl-CoA[c]	-1000	1000	0			0
R00316	atp[c] + Acetate[c] <=> Diphosphate[c] + Acetyl adenylate[c]	atp[c] + Acetate[c] <=> Diphosphate[c] + Acetyl adenylate[c]	-1000	1000	0			0
R00926	Propionyladenylate[c] + CoA[c] <=> AMP[c] + Propanoyl-CoA[c]	Propionyladenylate[c] + CoA[c] <=> AMP[c] + Propanoyl-CoA[c]	-1000	1000	0			1
R01354	atp[c] + Propanoate[c] <=> Diphosphate[c] + Propionyladenylate[c]	atp[c] + Propanoate[c] <=> Diphosphate[c] + Propionyladenylate[c]	-1000	1000	0			1
(1) md:tet_M00003 Gluconeogenesis, oxaloacetate => fructose-6P	gtp[c] + oxaloacetate[c] <==> co2[c] + gdp[c] + phosphoenolpyruvate[c]	gtp[c] + oxaloacetate[c] <=> co2[c] + gdp[c] + phosphoenolpyruvate[c]	-1000	1000	0	md:tet_M00003	Gluconeogenesis, oxaloacetate => fructose-6P	0
(2) md:tet_M00003 Gluconeogenesis, oxaloacetate => fructose-6P	itp[c] + oxaloacetate[c] <==> co2[c] + idp[c] + phosphoenolpyruvate[c]	itp[c] + oxaloacetate[c] <=> co2[c] + idp[c] + phosphoenolpyruvate[c]	-1000	1000	0	md:tet_M00003	Gluconeogenesis, oxaloacetate => fructose-6P	0
(3) md:tet_M00003 Gluconeogenesis, oxaloacetate => fructose-6P	atp[c] + oxaloacetate[c] <==> atp[c] + co2[c] + phosphoenolpyruvate[c]	atp[c] + oxaloacetate[c] <=> atp[c] + co2[c] + phosphoenolpyruvate[c]	-1000	1000	0	md:tet_M00003	Gluconeogenesis, oxaloacetate => fructose-6P	0
(4) md:tet_M00003 Gluconeogenesis, oxaloacetate => fructose-6P	2-phospho-d-glycerate[c] <==> h2o[c] + phosphoenolpyruvate[c]	2-phospho-d-glycerate[c] <=> h2o[c] + phosphoenolpyruvate[c]	-1000	1000	0	md:tet_M00003	Gluconeogenesis, oxaloacetate => fructose-6P	0
(5) md:tet_M00003 Gluconeogenesis, oxaloacetate => fructose-6P	2-phospho-d-glycerate[c] <==> 3-phospho-d-glycerate[c]	2-phospho-d-glycerate[c] <=> 3-phospho-d-glycerate[c]	-1000	1000	0	md:tet_M00003	Gluconeogenesis, oxaloacetate => fructose-6P	0
(6) md:tet_M00003 Gluconeogenesis, oxaloacetate => fructose-6P	3-phospho-d-glycerate[c] + atp[c] <==> 3-phospho-d-glyceroyl phosphate[c] + atp[c]	3-phospho-d-glycerate[c] + atp[c] <=> 3-phospho-d-glyceroyl phosphate[c] + atp[c]	-1000	1000	0	md:tet_M00003	Gluconeogenesis, oxaloacetate => fructose-6P	0
(7) md:tet_M00003 Gluconeogenesis, oxaloacetate => fructose-6P	d-glyceraldehyde 3-phosphate[c] + nad+[c] + orthophosphate[c] <==> 3-phospho-d-glyceroyl phosphate[c] + h+[c] + nadh[c]	d-glyceraldehyde 3-phosphate[c] + nad+[c] + orthophosphate[c] <=> 3-phospho-d-glyceroyl phosphate[c] + h+[c] + nadh[c]	-1000	1000	0	md:tet_M00003	Gluconeogenesis, oxaloacetate => fructose-6P	0
(8) md:tet_M00003 Gluconeogenesis, oxaloacetate => fructose-6P	d-glyceraldehyde 3-phosphate[c] + natp+[c] + orthophosphate[c] <==> 3-phospho-d-glyceroyl phosphate[c] + h+[c] + natph[c]	d-glyceraldehyde 3-phosphate[c] + natp+[c] + orthophosphate[c] <=> 3-phospho-d-glyceroyl phosphate[c] + h+[c] + natph[c]	-1000	1000	0	md:tet_M00003	Gluconeogenesis, oxaloacetate => fructose-6P	0
(9) md:tet_M00003 Gluconeogenesis, oxaloacetate => fructose-6P	d-glyceraldehyde 3-phosphate[c] <==> glycerone phosphate[c]	d-glyceraldehyde 3-phosphate[c] <=> glycerone phosphate[c]	-1000	1000	0	md:tet_M00003	Gluconeogenesis, oxaloacetate => fructose-6P	0
(10) md:tet_M00003 Gluconeogenesis, oxaloacetate => fructose-6P	beta-d-fructose 1,6-bisphosphate[c] <==> d-glyceraldehyde 3-phosphate[c] + glycerone phosphate[c]	beta-d-fructose 1,6-bisphosphate[c] <=> d-glyceraldehyde 3-phosphate[c] + glycerone phosphate[c]	-1000	1000	0	md:tet_M00003	Gluconeogenesis, oxaloacetate => fructose-6P	0
(11) md:tet_M00003 Gluconeogenesis, oxaloacetate => fructose-6P	beta-d-fructose 1,6-bisphosphate[c] + h2o[c] <==> beta-d-fructose 6-phosphate[c] + orthophosphate[c]	beta-d-fructose 1,6-bisphosphate[c] + h2o[c] <=> beta-d-fructose 6-phosphate[c] + orthophosphate[c]	-1000	1000	0	md:tet_M00003	Gluconeogenesis, oxaloacetate => fructose-6P	0
md:tet_M00005 PRPP biosynthesis, ribose 5P => PRPP	atp[c] + d-ribose 5-phosphate[c] <==> 5-phospho-alpha-d-ribose 1-diphosphate[c] + amp[c]	atp[c] + d-ribose 5-phosphate[c] <=> 5-phospho-alpha-d-ribose 1-diphosphate[c] + amp[c]	-1000	1000	0	md:tet_M00005	PRPP biosynthesis, ribose 5P => PRPP	0
(1) md:tet_M00007 Pentose phosphate pathway, non-oxidative phase, fructose 6P => ribose 5P	beta-d-fructose 6-phosphate[c] + d-glyceraldehyde 3-phosphate[c] <==> d-erythrose 4-phosphate[c] + d-xylulose 5-phosphate[c]	beta-d-fructose 6-phosphate[c] + d-glyceraldehyde 3-phosphate[c] <=> d-erythrose 4-phosphate[c] + d-xylulose 5-phosphate[c]	-1000	1000	0	md:tet_M00007	Pentose phosphate pathway, non-oxidative phase, fructose 6P => ribose 5P	0
(2) md:tet_M00007 Pentose phosphate pathway, non-oxidative phase, fructose 6P => ribose 5P	d-glyceraldehyde 3-phosphate[c] + sedoheptulose 7-phosphate[c] <==> beta-d-fructose 6-phosphate[c] + d-erythrose 4-phosphate[c]	d-glyceraldehyde 3-phosphate[c] + sedoheptulose 7-phosphate[c] <=> beta-d-fructose 6-phosphate[c] + d-erythrose 4-phosphate[c]	-1000	1000	0	md:tet_M00007	Pentose phosphate pathway, non-oxidative phase, fructose 6P => ribose 5P	0
(3) md:tet_M00007 Pentose phosphate pathway, non-oxidative phase, fructose 6P => ribose 5P	d-glyceraldehyde 3-phosphate[c] + sedoheptulose 7-phosphate[c] <==> d-ribose 5-phosphate[c] + d-xylulose 5-phosphate[c]	d-glyceraldehyde 3-phosphate[c] + sedoheptulose 7-phosphate[c] <=> d-ribose 5-phosphate[c] + d-xylulose 5-phosphate[c]	-1000	1000	0	md:tet_M00007	Pentose phosphate pathway, non-oxidative phase, fructose 6P => ribose 5P	0
(4) md:tet_M00007 Pentose phosphate pathway, non-oxidative phase, fructose 6P => ribose 5P	d-ribulose 5-phosphate[c] <==> d-xylulose 5-phosphate[c]	d-ribulose 5-phosphate[c] <=> d-xylulose 5-phosphate[c]	-1000	1000	0	md:tet_M00007	Pentose phosphate pathway, non-oxidative phase, fructose 6P => ribose 5P	0
(5) md:tet_M00007 Pentose phosphate pathway, non-oxidative phase, fructose 6P => ribose 5P	d-ribose 5-phosphate[c] <==> d-ribulose 5-phosphate[c]	d-ribose 5-phosphate[c] <=> d-ribulose 5-phosphate[c]	-1000	1000	0	md:tet_M00007	Pentose phosphate pathway, non-oxidative phase, fructose 6P => ribose 5P	0
(1) md:tet_M00010 Citrate cycle, first carbon oxidation, oxaloacetate => 2-oxoglutarate	citrate[c] + coa[c] <==> acetyl-coa[c] + h2o[c] + oxaloacetate[c]	citrate[c] + coa[c] <=> acetyl-coa[c] + h2o[c] + oxaloacetate[c]	-1000	1000	0	md:tet_M00010	Citrate cycle, first carbon oxidation, oxaloacetate => 2-oxoglutarate	0
(2) md:tet_M00010 Citrate cycle, first carbon oxidation, oxaloacetate => 2-oxoglutarate	citrate[c] <==> cis-aconitate[c] + h2o[c]	citrate[c] <=> cis-aconitate[c] + h2o[c]	-1000	1000	0	md:tet_M00010	Citrate cycle, first carbon oxidation, oxaloacetate => 2-oxoglutarate	0
(3) md:tet_M00010 Citrate cycle, first carbon oxidation, oxaloacetate => 2-oxoglutarate	isocitrate[c] <==> cis-aconitate[c] + h2o[c]	isocitrate[c] <=> cis-aconitate[c] + h2o[c]	-1000	1000	0	md:tet_M00010	Citrate cycle, first carbon oxidation, oxaloacetate => 2-oxoglutarate	0
(4) md:tet_M00010 Citrate cycle, first carbon oxidation, oxaloacetate => 2-oxoglutarate	citrate[c] <==> isocitrate[c]	citrate[c] <=> isocitrate[c]	-1000	1000	0	md:tet_M00010	Citrate cycle, first carbon oxidation, oxaloacetate => 2-oxoglutarate	0
(5) md:tet_M00010 Citrate cycle, first carbon oxidation, oxaloacetate => 2-oxoglutarate	isocitrate[c] + natp+[c] <==> h+[c] + natph+[c]+ oxalosuccinate[c]	isocitrate[c] + natp+[c] <=> h+[c] + natph+[c]+ oxalosuccinate[c]	-1000	1000	0	md:tet_M00010	Citrate cycle, first carbon oxidation, oxaloacetate => 2-oxoglutarate	0
(6) md:tet_M00010 Citrate cycle, first carbon oxidation, oxaloacetate => 2-oxoglutarate	oxalosuccinate[c] <==> 2-oxoglutarate[c] + co2[c]	oxalosuccinate[c] <=> 2-oxoglutarate[c] + co2[c]	-1000	1000	0	md:tet_M00010	Citrate cycle, first carbon oxidation, oxaloacetate => 2-oxoglutarate	0
(7) md:tet_M00010 Citrate cycle, first carbon oxidation, oxaloacetate => 2-oxoglutarate	isocitrate[c] + natp+[c] <==> 2-oxoglutarate[c] + co2[c] + h+[c] + natph[c]	isocitrate[c] + natp+[c] <=> 2-oxoglutarate[c] + co2[c] + h+[c] + natph[c]	-1000	1000	0	md:tet_M00010	Citrate cycle, first carbon oxidation, oxaloacetate => 2-oxoglutarate	0
(8) md:tet_M00010 Citrate cycle, first carbon oxidation, oxaloacetate => 2-oxoglutarate	isocitrate[c] + nad+[c] <==> 2-oxoglutarate[c] + co2[c] + h+[c] + nadh[c]	isocitrate[c] + nad+[c] <=> 2-oxoglutarate[c] + co2[c] + h+[c] + nadh[c]	-1000	1000	0	md:tet_M00010	Citrate cycle, first carbon oxidation, oxaloacetate => 2-oxoglutarate	0
(1) md:tet_M00012 Glyoxylate cycle	citrate[c] + coa[c] <==> acetyl-coa[c] + h2o[c] + oxaloacetate[c]	citrate[c] + coa[c] <=> acetyl-coa[c] + h2o[c] + oxaloacetate[c]	-1000	1000	0	md:tet_M00012	Glyoxylate cycle	0
(2) md:tet_M00012 Glyoxylate cycle	citrate[c] <==> cis-aconitate[c] + h2o[c]	citrate[c] <=> cis-aconitate[c] + h2o[c]	-1000	1000	0	md:tet_M00012	Glyoxylate cycle	0
(3) md:tet_M00012 Glyoxylate cycle	isocitrate[c] <==> cis-aconitate[c] + h2o[c]	isocitrate[c] <=> cis-aconitate[c] + h2o[c]	-1000	1000	0	md:tet_M00012	Glyoxylate cycle	0
(4) md:tet_M00012 Glyoxylate cycle	isocitrate[c] <==> glyoxylate[c] + succinate[c]	isocitrate[c] <=> glyoxylate[c] + succinate[c]	-1000	1000	0	md:tet_M00012	Glyoxylate cycle	0
(5) md:tet_M00012 Glyoxylate cycle	coa[c] + (s)-malate[c] <==> acetyl-coa[c] + glyoxylate[c] + h2o[c]	coa[c] + (s)-malate[c] <=> acetyl-coa[c] + glyoxylate[c] + h2o[c]	-1000	1000	0	md:tet_M00012	Glyoxylate cycle	0
(6) md:tet_M00012 Glyoxylate cycle	l-malyl-coa[c] <==> acetyl-coa[c] + glyoxylate[c]	l-malyl-coa[c] <=> acetyl-coa[c] + glyoxylate[c]	-1000	1000	0	md:tet_M00012	Glyoxylate cycle	0
(7) md:tet_M00012 Glyoxylate cycle	h2o[c] + l-malyl-coa[c] <==> coa[c] + (s)-malate[c]	h2o[c] + l-malyl-coa[c] <=> coa[c] + (s)-malate[c]	-1000	1000	0	md:tet_M00012	Glyoxylate cycle	0
(8) md:tet_M00012 Glyoxylate cycle	nad+[c] + (s)-malate[c] <==> h+[c] + nadh+[c]+ oxaloacetate[c]	nad+[c] + (s)-malate[c] <=> h+[c] + nadh+[c]+ oxaloacetate[c]	-1000	1000	0	md:tet_M00012	Glyoxylate cycle	0
(1) md:tet_M00036 Leucine degradation, leucine => acetoacetate + acetyl-CoA	2-oxoglutarate[c] + l-leucine[c] <==> 4-methyl-2-oxopentanoate[c] + l-glutamate[c]	2-oxoglutarate[c] + l-leucine[c] <=> 4-methyl-2-oxopentanoate[c] + l-glutamate[c]	-1000	1000	0	md:tet_M00036	Leucine degradation, leucine => acetoacetate + acetyl-CoA	1
(2) md:tet_M00036 Leucine degradation, leucine => acetoacetate + acetyl-CoA	4-methyl-2-oxopentanoate[c] + thiamin diphosphate[c] <==> 3-methyl-1-hydroxybutyl-thpp[c] + co2[c]	4-methyl-2-oxopentanoate[c] + thiamin diphosphate[c] <=> 3-methyl-1-hydroxybutyl-thpp[c] + co2[c]	-1000	1000	0	md:tet_M00036	Leucine degradation, leucine => acetoacetate + acetyl-CoA	0
(3) md:tet_M00036 Leucine degradation, leucine => acetoacetate + acetyl-CoA	3-methyl-1-hydroxybutyl-thpp[c] + enzyme n6-(lipoyl)lysine[c] <==> [dihydrolipoyllysine-residue (2-methylpropanoyl)transferase] s-(3-methylbutanoyl)dihydrolipoyllysine[c] + thiamin diphosphate[c]	3-methyl-1-hydroxybutyl-thpp[c] + enzyme n6-(lipoyl)lysine[c] <=> [dihydrolipoyllysine-residue (2-methylpropanoyl)transferase] s-(3-methylbutanoyl)dihydrolipoyllysine[c] + thiamin diphosphate[c]	-1000	1000	0	md:tet_M00036	Leucine degradation, leucine => acetoacetate + acetyl-CoA	0
(4) md:tet_M00036 Leucine degradation, leucine => acetoacetate + acetyl-CoA	3-methylbutanoyl-coa[c] + enzyme n6-(dihydrolipoyl)lysine[c] <==> coa[c] + [dihydrolipoyllysine-residue (2-methylpropanoyl)transferase] s-(3-methylbutanoyl)dihydrolipoyllysine[c]	3-methylbutanoyl-coa[c] + enzyme n6-(dihydrolipoyl)lysine[c] <=> coa[c] + [dihydrolipoyllysine-residue (2-methylpropanoyl)transferase] s-(3-methylbutanoyl)dihydrolipoyllysine[c]	-1000	1000	0	md:tet_M00036	Leucine degradation, leucine => acetoacetate + acetyl-CoA	0
(5) md:tet_M00036 Leucine degradation, leucine => acetoacetate + acetyl-CoA	enzyme n6-(dihydrolipoyl)lysine[c] + nad+[c] <==> enzyme n6-(lipoyl)lysine[c] + h+[c] + nadh[c]	enzyme n6-(dihydrolipoyl)lysine[c] + nad+[c] <=> enzyme n6-(lipoyl)lysine[c] + h+[c] + nadh[c]	-1000	1000	0	md:tet_M00036	Leucine degradation, leucine => acetoacetate + acetyl-CoA	0
(6) md:tet_M00036 Leucine degradation, leucine => acetoacetate + acetyl-CoA	3-methylbutanoyl-coa[c] + fad[c] <==> 3-methylcrotonyl-coa[c] + fadh2[c]	3-methylbutanoyl-coa[c] + fad[c] <=> 3-methylcrotonyl-coa[c] + fadh2[c]	-1000	1000	0	md:tet_M00036	Leucine degradation, leucine => acetoacetate + acetyl-CoA	0
(7) md:tet_M00036 Leucine degradation, leucine => acetoacetate + acetyl-CoA	3-methylcrotonyl-coa[c] + atp[c] + hco3-[c] <==> 3-methylglutaconyl-coa[c] + atp[c] + orthophosphate[c]	3-methylcrotonyl-coa[c] + atp[c] + hco3-[c] <=> 3-methylglutaconyl-coa[c] + atp[c] + orthophosphate[c]	-1000	1000	0	md:tet_M00036	Leucine degradation, leucine => acetoacetate + acetyl-CoA	0
(8) md:tet_M00036 Leucine degradation, leucine => acetoacetate + acetyl-CoA	(s)-3-hydroxy-3-methylglutaryl-coa[c] <==> 3-methylglutaconyl-coa[c] + h2o[c]	(s)-3-hydroxy-3-methylglutaryl-coa[c] <=> 3-methylglutaconyl-coa[c] + h2o[c]	-1000	1000	0	md:tet_M00036	Leucine degradation, leucine => acetoacetate + acetyl-CoA	0
(9) md:tet_M00036 Leucine degradation, leucine => acetoacetate + acetyl-CoA	(s)-3-hydroxy-3-methylglutaryl-coa[c] <==> acetoacetate[c] + acetyl-coa[c]	(s)-3-hydroxy-3-methylglutaryl-coa[c] <=> acetoacetate[c] + acetyl-coa[c]	-1000	1000	0	md:tet_M00036	Leucine degradation, leucine => acetoacetate + acetyl-CoA	0
(1) md:tet_M00049 Adenine ribonucleotide biosynthesis, IMP => atp,atp	gtp[c] + imp[c] + l-aspartate[c] <==> gdp[c] + n6-(1,2-dicarboxyethyl)-amp[c] + orthophosphate[c]	gtp[c] + imp[c] + l-aspartate[c] <=> gdp[c] + n6-(1,2-dicarboxyethyl)-amp[c] + orthophosphate[c]	-1000	1000	0	md:tet_M00049	Adenine ribonucleotide biosynthesis, IMP => atp,atp	0
(2) md:tet_M00049 Adenine ribonucleotide biosynthesis, IMP => atp,atp	n6-(1,2-dicarboxyethyl)-amp[c] <==> amp[c] + fumarate[c]	n6-(1,2-dicarboxyethyl)-amp[c] <=> amp[c] + fumarate[c]	-1000	1000	0	md:tet_M00049	Adenine ribonucleotide biosynthesis, IMP => atp,atp	0
(3) md:tet_M00049 Adenine ribonucleotide biosynthesis, IMP => atp,atp	amp[c] + atp[c] <==> (2) atp[c]	amp[c] + atp[c] <=> (2) atp[c]	-1000	1000	0	md:tet_M00049	Adenine ribonucleotide biosynthesis, IMP => atp,atp	0
(4) md:tet_M00049 Adenine ribonucleotide biosynthesis, IMP => atp,atp	amp[c] + nucleoside triphosphate[c] <==> atp[c] + ndp[c]	amp[c] + nucleoside triphosphate[c] <=> atp[c] + ndp[c]	-1000	1000	0	md:tet_M00049	Adenine ribonucleotide biosynthesis, IMP => atp,atp	1
(5) md:tet_M00049 Adenine ribonucleotide biosynthesis, IMP => atp,atp	atp[c] + atp[c] <==> atp[c] + atp[c]	atp[c] + atp[c] <=> atp[c] + atp[c]	-1000	1000	0	md:tet_M00049	Adenine ribonucleotide biosynthesis, IMP => atp,atp	0
(6) md:tet_M00049 Adenine ribonucleotide biosynthesis, IMP => atp,atp	atp[c] + pyruvate[c] <==> atp[c] + phosphoenolpyruvate[c]	atp[c] + pyruvate[c] <=> atp[c] + phosphoenolpyruvate[c]	-1000	1000	0	md:tet_M00049	Adenine ribonucleotide biosynthesis, IMP => atp,atp	0
(1) md:tet_M00052 Pyrimidine ribonucleotide biosynthesis, UMP => UDP/UTP,CDP/CTP	atp[c] + ump[c] <==> atp[c] + udp[c]	atp[c] + ump[c] <=> atp[c] + udp[c]	-1000	1000	0	md:tet_M00052	Pyrimidine ribonucleotide biosynthesis, UMP => UDP/UTP,CDP/CTP	0
(2) md:tet_M00052 Pyrimidine ribonucleotide biosynthesis, UMP => UDP/UTP,CDP/CTP	atp[c] + udp[c] <==> atp[c] + utp[c]	atp[c] + udp[c] <=> atp[c] + utp[c]	-1000	1000	0	md:tet_M00052	Pyrimidine ribonucleotide biosynthesis, UMP => UDP/UTP,CDP/CTP	0
(3) md:tet_M00052 Pyrimidine ribonucleotide biosynthesis, UMP => UDP/UTP,CDP/CTP	ammonia[c] + atp[c] + utp[c] <==> atp[c] + ctp[c] + orthophosphate[c]	ammonia[c] + atp[c] + utp[c] <=> atp[c] + ctp[c] + orthophosphate[c]	-1000	1000	0	md:tet_M00052	Pyrimidine ribonucleotide biosynthesis, UMP => UDP/UTP,CDP/CTP	0
(4) md:tet_M00052 Pyrimidine ribonucleotide biosynthesis, UMP => UDP/UTP,CDP/CTP	atp[c] + h2o[c] + l-glutamine[c] + utp[c] <==> atp[c] + ctp[c] + l-glutamate[c] + orthophosphate[c]	atp[c] + h2o[c] + l-glutamine[c] + utp[c] <=> atp[c] + ctp[c] + l-glutamate[c] + orthophosphate[c]	-1000	1000	0	md:tet_M00052	Pyrimidine ribonucleotide biosynthesis, UMP => UDP/UTP,CDP/CTP	0
(5) md:tet_M00052 Pyrimidine ribonucleotide biosynthesis, UMP => UDP/UTP,CDP/CTP	atp[c] + cdp[c] <==> atp[c] + ctp[c]	atp[c] + cdp[c] <=> atp[c] + ctp[c]	-1000	1000	0	md:tet_M00052	Pyrimidine ribonucleotide biosynthesis, UMP => UDP/UTP,CDP/CTP	0
(1) md:tet_M00082 Fatty acid biosynthesis, initiation	acetyl-coa[c] + acyl-carrier protein[c] <==> acetyl-[acyl-carrier protein][c] + coa[c]	acetyl-coa[c] + acyl-carrier protein[c] <=> acetyl-[acyl-carrier protein][c] + coa[c]	-1000	1000	0	md:tet_M00082	Fatty acid biosynthesis, initiation	0
(2) md:tet_M00082 Fatty acid biosynthesis, initiation	acetyl-[acyl-carrier protein][c] + malonyl-[acyl-carrier protein][c] <==> acetoacetyl-[acp][c] + acyl-carrier protein[c] + co2[c]	acetyl-[acyl-carrier protein][c] + malonyl-[acyl-carrier protein][c] <=> acetoacetyl-[acp][c] + acyl-carrier protein[c] + co2[c]	-1000	1000	0	md:tet_M00082	Fatty acid biosynthesis, initiation	0
(3) md:tet_M00082 Fatty acid biosynthesis, initiation	acetyl-coa[c] + atp[c] + hco3-[c] <==> atp[c] + malonyl-coa[c] + orthophosphate[c]	acetyl-coa[c] + atp[c] + hco3-[c] <=> atp[c] + malonyl-coa[c] + orthophosphate[c]	-1000	1000	0	md:tet_M00082	Fatty acid biosynthesis, initiation	0
(4) md:tet_M00082 Fatty acid biosynthesis, initiation	acyl-carrier protein[c] + malonyl-coa[c] <==> coa[c] + malonyl-[acyl-carrier protein][c]	acyl-carrier protein[c] + malonyl-coa[c] <=> coa[c] + malonyl-[acyl-carrier protein][c]	-1000	1000	0	md:tet_M00082	Fatty acid biosynthesis, initiation	0
(5) md:tet_M00082 Fatty acid biosynthesis, initiation	acetyl-coa[c] + malonyl-[acyl-carrier protein][c] <==> acetoacetyl-[acp][c] + co2[c] + coa[c]	acetyl-coa[c] + malonyl-[acyl-carrier protein][c] <=> acetoacetyl-[acp][c] + co2[c] + coa[c]	-1000	1000	0	md:tet_M00082	Fatty acid biosynthesis, initiation	0
(1) md:tet_M00083 Fatty acid biosynthesis, elongation	acetyl-[acyl-carrier protein][c] + malonyl-[acyl-carrier protein][c] <==> acetoacetyl-[acp][c] + acyl-carrier protein[c] + co2[c]	acetyl-[acyl-carrier protein][c] + malonyl-[acyl-carrier protein][c] <=> acetoacetyl-[acp][c] + acyl-carrier protein[c] + co2[c]	-1000	1000	0	md:tet_M00083	Fatty acid biosynthesis, elongation	0
(2) md:tet_M00083 Fatty acid biosynthesis, elongation	(3r)-3-hydroxybutanoyl-[acyl-carrier protein][c] + natp+[c] <==> acetoacetyl-[acp][c] + h+[c] + natph[c]	(3r)-3-hydroxybutanoyl-[acyl-carrier protein][c] + natp+[c] <=> acetoacetyl-[acp][c] + h+[c] + natph[c]	-1000	1000	0	md:tet_M00083	Fatty acid biosynthesis, elongation	0
(3) md:tet_M00083 Fatty acid biosynthesis, elongation	(3r)-3-hydroxybutanoyl-[acyl-carrier protein][c] <==> but-2-enoyl-[acyl-carrier protein][c] + h2o[c]	(3r)-3-hydroxybutanoyl-[acyl-carrier protein][c] <=> but-2-enoyl-[acyl-carrier protein][c] + h2o[c]	-1000	1000	0	md:tet_M00083	Fatty acid biosynthesis, elongation	0
(4) md:tet_M00083 Fatty acid biosynthesis, elongation	butyryl-[acp][c] + natp+[c] <==> but-2-enoyl-[acyl-carrier protein][c] + h+[c] + natph[c]	butyryl-[acp][c] + natp+[c] <=> but-2-enoyl-[acyl-carrier protein][c] + h+[c] + natph[c]	-1000	1000	0	md:tet_M00083	Fatty acid biosynthesis, elongation	0
md:tet_M00086 beta-Oxidation, acyl-CoA synthesis	atp[c] + coa[c] + hexadecanoic acid[c] <==> amp[c] + diphosphate[c] + palmitoyl-coa[c]	atp[c] + coa[c] + hexadecanoic acid[c] <=> amp[c] + diphosphate[c] + palmitoyl-coa[c]	-1000	1000	0	md:tet_M00086	beta-Oxidation, acyl-CoA synthesis	0
(1) md:tet_M00087 beta-Oxidation	fad[c] + palmitoyl-coa[c] <==> fadh2[c] + trans-hexadec-2-enoyl-coa[c]	fad[c] + palmitoyl-coa[c] <=> fadh2[c] + trans-hexadec-2-enoyl-coa[c]	-1000	1000	0	md:tet_M00087	beta-Oxidation	0
(2) md:tet_M00087 beta-Oxidation	(s)-3-hydroxyhexadecanoyl-coa[c] <==> h2o[c] + trans-hexadec-2-enoyl-coa[c]	(s)-3-hydroxyhexadecanoyl-coa[c] <=> h2o[c] + trans-hexadec-2-enoyl-coa[c]	-1000	1000	0	md:tet_M00087	beta-Oxidation	0
(3) md:tet_M00087 beta-Oxidation	nad+[c] + (s)-3-hydroxyhexadecanoyl-coa[c] <==> 3-oxopalmitoyl-coa[c] + h+[c] + nadh[c]	nad+[c] + (s)-3-hydroxyhexadecanoyl-coa[c] <=> 3-oxopalmitoyl-coa[c] + h+[c] + nadh[c]	-1000	1000	0	md:tet_M00087	beta-Oxidation	0
(4) md:tet_M00087 beta-Oxidation	acetyl-coa[c] + tetradecanoyl-coa[c] <==> 3-oxopalmitoyl-coa[c] + coa[c]	acetyl-coa[c] + tetradecanoyl-coa[c] <=> 3-oxopalmitoyl-coa[c] + coa[c]	-1000	1000	0	md:tet_M00087	beta-Oxidation	0
(1) md:tet_M00092 Phosphatidylethanolamine (PE) biosynthesis, ethanolamine => PE	atp[c] + ethanolamine[c] <==> atp[c] + ethanolamine phosphate[c]	atp[c] + ethanolamine[c] <=> atp[c] + ethanolamine phosphate[c]	-1000	1000	0	md:tet_M00092	Phosphatidylethanolamine (PE) biosynthesis, ethanolamine => PE	1
(2) md:tet_M00092 Phosphatidylethanolamine (PE) biosynthesis, ethanolamine => PE	ctp[c] + ethanolamine phosphate[c] <==> cdp-ethanolamine[c] + diphosphate[c]	ctp[c] + ethanolamine phosphate[c] <=> cdp-ethanolamine[c] + diphosphate[c]	-1000	1000	0	md:tet_M00092	Phosphatidylethanolamine (PE) biosynthesis, ethanolamine => PE	0
(3) md:tet_M00092 Phosphatidylethanolamine (PE) biosynthesis, ethanolamine => PE	1,2-diacyl-sn-glycerol[c] + cdp-ethanolamine[c] <==> cmp[c] + phosphatidylethanolamine[c]	1,2-diacyl-sn-glycerol[c] + cdp-ethanolamine[c] <=> cmp[c] + phosphatidylethanolamine[c]	-1000	1000	0	md:tet_M00092	Phosphatidylethanolamine (PE) biosynthesis, ethanolamine => PE	0
(1) md:tet_M00098 Acylglycerol degradation	h2o[c] + triacylglycerol[c] <==> 1,2-diacyl-sn-glycerol[c] + fatty acid[c]	h2o[c] + triacylglycerol[c] <=> 1,2-diacyl-sn-glycerol[c] + fatty acid[c]	-1000	1000	0	md:tet_M00098	Acylglycerol degradation	0
(2) md:tet_M00098 Acylglycerol degradation	1,2-diacyl-sn-glycerol[c] + h2o[c] <==> 1-acylglycerol[c] + fatty acid[c]	1,2-diacyl-sn-glycerol[c] + h2o[c] <=> 1-acylglycerol[c] + fatty acid[c]	-1000	1000	0	md:tet_M00098	Acylglycerol degradation	0
(3) md:tet_M00098 Acylglycerol degradation	1-acylglycerol[c] + h2o[c] <==> fatty acid[c] + glycerol[c]	1-acylglycerol[c] + h2o[c] <=> fatty acid[c] + glycerol[c]	-1000	1000	0	md:tet_M00098	Acylglycerol degradation	0
md:tet_M00151 Cytochrome bc1 complex respiratory unit	(2) ferricytochrome c[c] + ubiquinol[c] <==> (2) ferrocytochrome c[c] + (2) h+[c] + ubiquinone[c]	(2) ferricytochrome c[c] + ubiquinol[c] <=> (2) ferrocytochrome c[c] + (2) h+[c] + ubiquinone[c]	-1000	1000	0	md:tet_M00151	Cytochrome bc1 complex respiratory unit	1
(1) md:tet_M00165 Reductive pentose phosphate cycle (Calvin cycle)	atp[c] + d-ribulose 5-phosphate[c] <==> atp[c] + d-ribulose 1,5-bisphosphate[c]	atp[c] + d-ribulose 5-phosphate[c] <=> atp[c] + d-ribulose 1,5-bisphosphate[c]	-1000	1000	0	md:tet_M00165	Reductive pentose phosphate cycle (Calvin cycle)	0
(2) md:tet_M00165 Reductive pentose phosphate cycle (Calvin cycle)	co2[c] + d-ribulose 1,5-bisphosphate[c] + h2o[c] <==> (2) 3-phospho-d-glycerate[c]	co2[c] + d-ribulose 1,5-bisphosphate[c] + h2o[c] <=> (2) 3-phospho-d-glycerate[c]	-1000	1000	0	md:tet_M00165	Reductive pentose phosphate cycle (Calvin cycle)	0
(3) md:tet_M00165 Reductive pentose phosphate cycle (Calvin cycle)	3-phospho-d-glycerate[c] + atp[c] <==> 3-phospho-d-glyceroyl phosphate[c] + atp[c]	3-phospho-d-glycerate[c] + atp[c] <=> 3-phospho-d-glyceroyl phosphate[c] + atp[c]	-1000	1000	0	md:tet_M00165	Reductive pentose phosphate cycle (Calvin cycle)	0
(4) md:tet_M00165 Reductive pentose phosphate cycle (Calvin cycle)	d-glyceraldehyde 3-phosphate[c] + nad+[c] + orthophosphate[c] <==> 3-phospho-d-glyceroyl phosphate[c] + h+[c] + nadh[c]	d-glyceraldehyde 3-phosphate[c] + nad+[c] + orthophosphate[c] <=> 3-phospho-d-glyceroyl phosphate[c] + h+[c] + nadh[c]	-1000	1000	0	md:tet_M00165	Reductive pentose phosphate cycle (Calvin cycle)	0
(5) md:tet_M00165 Reductive pentose phosphate cycle (Calvin cycle)	d-fructose 1,6-bisphosphate[c] <==> d-glyceraldehyde 3-phosphate[c] + glycerone phosphate[c]	d-fructose 1,6-bisphosphate[c] <=> d-glyceraldehyde 3-phosphate[c] + glycerone phosphate[c]	-1000	1000	0	md:tet_M00165	Reductive pentose phosphate cycle (Calvin cycle)	0
(6) md:tet_M00165 Reductive pentose phosphate cycle (Calvin cycle)	d-fructose 1,6-bisphosphate[c] + h2o[c] <==> d-fructose 6-phosphate[c] + orthophosphate[c]	d-fructose 1,6-bisphosphate[c] + h2o[c] <=> d-fructose 6-phosphate[c] + orthophosphate[c]	-1000	1000	0	md:tet_M00165	Reductive pentose phosphate cycle (Calvin cycle)	0
(7) md:tet_M00165 Reductive pentose phosphate cycle (Calvin cycle)	d-fructose 6-phosphate[c] + d-glyceraldehyde 3-phosphate[c] <==> d-erythrose 4-phosphate[c] + d-xylulose 5-phosphate[c]	d-fructose 6-phosphate[c] + d-glyceraldehyde 3-phosphate[c] <=> d-erythrose 4-phosphate[c] + d-xylulose 5-phosphate[c]	-1000	1000	0	md:tet_M00165	Reductive pentose phosphate cycle (Calvin cycle)	0
(8) md:tet_M00165 Reductive pentose phosphate cycle (Calvin cycle)	sedoheptulose 1,7-bisphosphate[c] <==> d-erythrose 4-phosphate[c] + glycerone phosphate[c]	sedoheptulose 1,7-bisphosphate[c] <=> d-erythrose 4-phosphate[c] + glycerone phosphate[c]	-1000	1000	0	md:tet_M00165	Reductive pentose phosphate cycle (Calvin cycle)	0
(9) md:tet_M00165 Reductive pentose phosphate cycle (Calvin cycle)	h2o[c] + sedoheptulose 1,7-bisphosphate[c] <==> orthophosphate[c] + sedoheptulose 7-phosphate[c]	h2o[c] + sedoheptulose 1,7-bisphosphate[c] <=> orthophosphate[c] + sedoheptulose 7-phosphate[c]	-1000	1000	0	md:tet_M00165	Reductive pentose phosphate cycle (Calvin cycle)	0
(10) md:tet_M00165 Reductive pentose phosphate cycle (Calvin cycle)	d-glyceraldehyde 3-phosphate[c] + sedoheptulose 7-phosphate[c] <==> d-ribose 5-phosphate[c] + d-xylulose 5-phosphate[c]	d-glyceraldehyde 3-phosphate[c] + sedoheptulose 7-phosphate[c] <=> d-ribose 5-phosphate[c] + d-xylulose 5-phosphate[c]	-1000	1000	0	md:tet_M00165	Reductive pentose phosphate cycle (Calvin cycle)	0
(11) md:tet_M00165 Reductive pentose phosphate cycle (Calvin cycle)	d-ribose 5-phosphate[c] <==> d-ribulose 5-phosphate[c]	d-ribose 5-phosphate[c] <=> d-ribulose 5-phosphate[c]	-1000	1000	0	md:tet_M00165	Reductive pentose phosphate cycle (Calvin cycle)	0
(1) md:tet_M00166 Reductive pentose phosphate cycle, ribulose-5P => glyceraldehyde-3P	atp[c] + d-ribulose 5-phosphate[c] <==> atp[c] + d-ribulose 1,5-bisphosphate[c]	atp[c] + d-ribulose 5-phosphate[c] <=> atp[c] + d-ribulose 1,5-bisphosphate[c]	-1000	1000	0	md:tet_M00166	Reductive pentose phosphate cycle, ribulose-5P => glyceraldehyde-3P	0
(2) md:tet_M00166 Reductive pentose phosphate cycle, ribulose-5P => glyceraldehyde-3P	co2[c] + d-ribulose 1,5-bisphosphate[c] + h2o[c] <==> (2) 3-phospho-d-glycerate[c]	co2[c] + d-ribulose 1,5-bisphosphate[c] + h2o[c] <=> (2) 3-phospho-d-glycerate[c]	-1000	1000	0	md:tet_M00166	Reductive pentose phosphate cycle, ribulose-5P => glyceraldehyde-3P	0
(3) md:tet_M00166 Reductive pentose phosphate cycle, ribulose-5P => glyceraldehyde-3P	3-phospho-d-glycerate[c] + atp[c] <==> 3-phospho-d-glyceroyl phosphate[c] + atp[c]	3-phospho-d-glycerate[c] + atp[c] <=> 3-phospho-d-glyceroyl phosphate[c] + atp[c]	-1000	1000	0	md:tet_M00166	Reductive pentose phosphate cycle, ribulose-5P => glyceraldehyde-3P	0
(4) md:tet_M00166 Reductive pentose phosphate cycle, ribulose-5P => glyceraldehyde-3P	d-glyceraldehyde 3-phosphate[c] + nad+[c] + orthophosphate[c] <==> 3-phospho-d-glyceroyl phosphate[c] + h+[c] + nadh[c]	d-glyceraldehyde 3-phosphate[c] + nad+[c] + orthophosphate[c] <=> 3-phospho-d-glyceroyl phosphate[c] + h+[c] + nadh[c]	-1000	1000	0	md:tet_M00166	Reductive pentose phosphate cycle, ribulose-5P => glyceraldehyde-3P	0
(1) md:tet_M00167 Reductive pentose phosphate cycle, glyceraldehyde-3P => ribulose-5P	d-fructose 1,6-bisphosphate[c] <==> d-glyceraldehyde 3-phosphate[c] + glycerone phosphate[c]	d-fructose 1,6-bisphosphate[c] <=> d-glyceraldehyde 3-phosphate[c] + glycerone phosphate[c]	-1000	1000	0	md:tet_M00167	Reductive pentose phosphate cycle, glyceraldehyde-3P => ribulose-5P	0
(2) md:tet_M00167 Reductive pentose phosphate cycle, glyceraldehyde-3P => ribulose-5P	d-fructose 1,6-bisphosphate[c] + h2o[c] <==> d-fructose 6-phosphate[c] + orthophosphate[c]	d-fructose 1,6-bisphosphate[c] + h2o[c] <=> d-fructose 6-phosphate[c] + orthophosphate[c]	-1000	1000	0	md:tet_M00167	Reductive pentose phosphate cycle, glyceraldehyde-3P => ribulose-5P	0
(3) md:tet_M00167 Reductive pentose phosphate cycle, glyceraldehyde-3P => ribulose-5P	d-fructose 6-phosphate[c] + d-glyceraldehyde 3-phosphate[c] <==> d-erythrose 4-phosphate[c] + d-xylulose 5-phosphate[c]	d-fructose 6-phosphate[c] + d-glyceraldehyde 3-phosphate[c] <=> d-erythrose 4-phosphate[c] + d-xylulose 5-phosphate[c]	-1000	1000	0	md:tet_M00167	Reductive pentose phosphate cycle, glyceraldehyde-3P => ribulose-5P	0
(4) md:tet_M00167 Reductive pentose phosphate cycle, glyceraldehyde-3P => ribulose-5P	sedoheptulose 1,7-bisphosphate[c] <==> d-erythrose 4-phosphate[c] + glycerone phosphate[c]	sedoheptulose 1,7-bisphosphate[c] <=> d-erythrose 4-phosphate[c] + glycerone phosphate[c]	-1000	1000	0	md:tet_M00167	Reductive pentose phosphate cycle, glyceraldehyde-3P => ribulose-5P	0
(5) md:tet_M00167 Reductive pentose phosphate cycle, glyceraldehyde-3P => ribulose-5P	h2o[c] + sedoheptulose 1,7-bisphosphate[c] <==> orthophosphate[c] + sedoheptulose 7-phosphate[c]	h2o[c] + sedoheptulose 1,7-bisphosphate[c] <=> orthophosphate[c] + sedoheptulose 7-phosphate[c]	-1000	1000	0	md:tet_M00167	Reductive pentose phosphate cycle, glyceraldehyde-3P => ribulose-5P	0
(6) md:tet_M00167 Reductive pentose phosphate cycle, glyceraldehyde-3P => ribulose-5P	d-glyceraldehyde 3-phosphate[c] + sedoheptulose 7-phosphate[c] <==> d-ribose 5-phosphate[c] + d-xylulose 5-phosphate[c]	d-glyceraldehyde 3-phosphate[c] + sedoheptulose 7-phosphate[c] <=> d-ribose 5-phosphate[c] + d-xylulose 5-phosphate[c]	-1000	1000	0	md:tet_M00167	Reductive pentose phosphate cycle, glyceraldehyde-3P => ribulose-5P	0
(7) md:tet_M00167 Reductive pentose phosphate cycle, glyceraldehyde-3P => ribulose-5P	d-ribose 5-phosphate[c] <==> d-ribulose 5-phosphate[c]	d-ribose 5-phosphate[c] <=> d-ribulose 5-phosphate[c]	-1000	1000	0	md:tet_M00167	Reductive pentose phosphate cycle, glyceraldehyde-3P => ribulose-5P	0
(1) md:tet_M00168 CAM (Crassulacean acid metabolism), dark	orthophosphate[c] + oxaloacetate[c] <==> co2[c] + h2o[c] + phosphoenolpyruvate[c]	orthophosphate[c] + oxaloacetate[c] <=> co2[c] + h2o[c] + phosphoenolpyruvate[c]	-1000	1000	0	md:tet_M00168	CAM (Crassulacean acid metabolism), dark	0
(2) md:tet_M00168 CAM (Crassulacean acid metabolism), dark	nad+[c] + (s)-malate[c] <==> h+[c] + nadh+[c]+ oxaloacetate[c]	nad+[c] + (s)-malate[c] <=> h+[c] + nadh+[c]+ oxaloacetate[c]	-1000	1000	0	md:tet_M00168	CAM (Crassulacean acid metabolism), dark	0
(1) md:tet_M00169 CAM (Crassulacean acid metabolism), light	natp+[c] + (s)-malate[c] <==> co2[c] + h+[c] + natph+[c]+ pyruvate[c]	natp+[c] + (s)-malate[c] <=> co2[c] + h+[c] + natph+[c]+ pyruvate[c]	-1000	1000	0	md:tet_M00169	CAM (Crassulacean acid metabolism), light	0
(2) md:tet_M00169 CAM (Crassulacean acid metabolism), light	atp[c] + orthophosphate[c] + pyruvate[c] <==> amp[c] + diphosphate[c] + phosphoenolpyruvate[c]	atp[c] + orthophosphate[c] + pyruvate[c] <=> amp[c] + diphosphate[c] + phosphoenolpyruvate[c]	-1000	1000	0	md:tet_M00169	CAM (Crassulacean acid metabolism), light	0
(1) md:tet_M00307 Pyruvate oxidation, pyruvate => acetyl-CoA	coa[c] + nad+[c] + pyruvate[c] <==> acetyl-coa[c] + co2[c] + h+[c] + nadh[c]	coa[c] + nad+[c] + pyruvate[c] <=> acetyl-coa[c] + co2[c] + h+[c] + nadh[c]	-1000	1000	0	md:tet_M00307	Pyruvate oxidation, pyruvate => acetyl-CoA	0
(2) md:tet_M00307 Pyruvate oxidation, pyruvate => acetyl-CoA	acetyl-coa[c] + co2[c] + (2) h+[c] + (2) reduced ferredoxin[c] <==> coa[c] + (2) oxidized ferredoxin[c] + pyruvate[c]	acetyl-coa[c] + co2[c] + (2) h+[c] + (2) reduced ferredoxin[c] <=> coa[c] + (2) oxidized ferredoxin[c] + pyruvate[c]	-1000	1000	0	md:tet_M00307	Pyruvate oxidation, pyruvate => acetyl-CoA	0
(1) md:tet_M00338 Cysteine biosynthesis, homocysteine + serine => cysteine	l-homocysteine[c] + l-serine[c] <==> h2o[c] + l-cystathionine[c]	l-homocysteine[c] + l-serine[c] <=> h2o[c] + l-cystathionine[c]	-1000	1000	0	md:tet_M00338	Cysteine biosynthesis, homocysteine + serine => cysteine	0
(2) md:tet_M00338 Cysteine biosynthesis, homocysteine + serine => cysteine	h2o[c] + l-cystathionine[c] <==> 2-oxobutanoate[c] + ammonia[c] + l-cysteine[c]	h2o[c] + l-cystathionine[c] <=> 2-oxobutanoate[c] + ammonia[c] + l-cysteine[c]	-1000	1000	0	md:tet_M00338	Cysteine biosynthesis, homocysteine + serine => cysteine	0
R04952 butyryl-[acyl-carrier protein]:malonyl-[acyl-carrier-protein] C-acyltransferase (decarboxylating)	butyryl-[acp][c] + malonyl-[acyl-carrier protein][c] <==> 3-oxohexanoyl-[acp][c] + acyl-carrier protein[c] + co2[c]	butyryl-[acp][c] + malonyl-[acyl-carrier protein][c] <=> 3-oxohexanoyl-[acp][c] + acyl-carrier protein[c] + co2[c]	-1000	1000	0	R04952	butyryl-[acyl-carrier protein]:malonyl-[acyl-carrier-protein] C-acyltransferase (decarboxylating)	0
R04953 (3R)-3-Hydroxyhexanoyl-[acyl-carrier-protein]:Natp+ oxidoreductase	natp+[c] + (r)-3-hydroxyhexanoyl-[acp][c] <==> 3-oxohexanoyl-[acp][c] + h+[c] + natph[c]	natp+[c] + (r)-3-hydroxyhexanoyl-[acp][c] <=> 3-oxohexanoyl-[acp][c] + h+[c] + natph[c]	-1000	1000	0	R04953	(3R)-3-Hydroxyhexanoyl-[acyl-carrier-protein]:Natp+ oxidoreductase	0
R04954 (3R)-3-Hydroxybutanoyl-[acyl-carrier-protein] hydro-lyase	(r)-3-hydroxyhexanoyl-[acp][c] <==> h2o[c] + trans-hex-2-enoyl-[acp][c]	(r)-3-hydroxyhexanoyl-[acp][c] <=> h2o[c] + trans-hex-2-enoyl-[acp][c]	-1000	1000	0	R04954	(3R)-3-Hydroxybutanoyl-[acyl-carrier-protein] hydro-lyase	0
R04956 hexanoyl-[acp]:Natp+ trans-2-oxidoreductase	hexanoyl-[acp][c] + natp+[c] <==> h+[c] + natph+[c]+ trans-hex-2-enoyl-[acp][c]	hexanoyl-[acp][c] + natp+[c] <=> h+[c] + natph+[c]+ trans-hex-2-enoyl-[acp][c]	-1000	1000	0	R04956	hexanoyl-[acp]:Natp+ trans-2-oxidoreductase	0
R04957 hexanoyl-[acyl-carrier protein]:malonyl-[acyl-carrier-protein] C-acyltransferase (decarboxylating)	hexanoyl-[acp][c] + malonyl-[acyl-carrier protein][c] <==> 3-oxooctanoyl-[acp][c] + acyl-carrier protein[c] + co2[c]	hexanoyl-[acp][c] + malonyl-[acyl-carrier protein][c] <=> 3-oxooctanoyl-[acp][c] + acyl-carrier protein[c] + co2[c]	-1000	1000	0	R04957	hexanoyl-[acyl-carrier protein]:malonyl-[acyl-carrier-protein] C-acyltransferase (decarboxylating)	0
R04536 (3R)-3-Hydroxyoctanoyl-[acyl-carrier-protein]:Natp+ oxidoreductase	(3r)-3-hydroxyoctanoyl-[acyl-carrier protein][c] + natp+[c] <==> 3-oxooctanoyl-[acp][c] + h+[c] + natph[c]	(3r)-3-hydroxyoctanoyl-[acyl-carrier protein][c] + natp+[c] <=> 3-oxooctanoyl-[acp][c] + h+[c] + natph[c]	-1000	1000	0	R04536	(3R)-3-Hydroxyoctanoyl-[acyl-carrier-protein]:Natp+ oxidoreductase	0
R04537 (3R)-3-Hydroxybutanoyl-[acyl-carrier-protein] hydro-lyase;	(3r)-3-hydroxyoctanoyl-[acyl-carrier protein][c] <==> h2o[c] + trans-oct-2-enoyl-[acp][c]	(3r)-3-hydroxyoctanoyl-[acyl-carrier protein][c] <=> h2o[c] + trans-oct-2-enoyl-[acp][c]	-1000	1000	0	R04537	(3R)-3-Hydroxybutanoyl-[acyl-carrier-protein] hydro-lyase;	0
R04959 octanoyl-[acp]:Natp+ trans-2-oxidoreductase	natp+[c] + octanoyl-[acp][c] <==> h+[c] + natph+[c]+ trans-oct-2-enoyl-[acp][c]	natp+[c] + octanoyl-[acp][c] <=> h+[c] + natph+[c]+ trans-oct-2-enoyl-[acp][c]	-1000	1000	0	R04959	octanoyl-[acp]:Natp+ trans-2-oxidoreductase	0
R08157 octanoyl-[acyl-carrier protein] hydrolase	h2o[c] + octanoyl-[acp][c] <==> acyl-carrier protein[c] + octanoic acid[c]	h2o[c] + octanoyl-[acp][c] <=> acyl-carrier protein[c] + octanoic acid[c]	-1000	1000	0	R08157	octanoyl-[acyl-carrier protein] hydrolase	1
R04960 Octanoyl-[acyl-carrier protein]:malonyl-[acyl-carrier-protein] C-acyltransferase (decarboxylating)	malonyl-[acyl-carrier protein][c] + octanoyl-[acp][c] <==> 3-oxodecanoyl-[acp][c] + acyl-carrier protein[c] + co2[c]	malonyl-[acyl-carrier protein][c] + octanoyl-[acp][c] <=> 3-oxodecanoyl-[acp][c] + acyl-carrier protein[c] + co2[c]	-1000	1000	0	R04960	Octanoyl-[acyl-carrier protein]:malonyl-[acyl-carrier-protein] C-acyltransferase (decarboxylating)	0
R04534 (3R)-3-Hydroxydecanoyl-[acyl-carrier-protein]:Natp+ oxidoreductase	(3r)-3-hydroxydecanoyl-[acyl-carrier protein][c] + natp+[c] <==> 3-oxodecanoyl-[acp][c] + natph[c]	(3r)-3-hydroxydecanoyl-[acyl-carrier protein][c] + natp+[c] <=> 3-oxodecanoyl-[acp][c] + natph[c]	-1000	1000	0	R04534	(3R)-3-Hydroxydecanoyl-[acyl-carrier-protein]:Natp+ oxidoreductase	0
R04535 (3R)-3-Hydroxybutanoyl-[acyl-carrier-protein] hydro-lyase	(3r)-3-hydroxydecanoyl-[acyl-carrier protein][c] <==> h2o[c] + trans-dec-2-enoyl-[acp][c]	(3r)-3-hydroxydecanoyl-[acyl-carrier protein][c] <=> h2o[c] + trans-dec-2-enoyl-[acp][c]	-1000	1000	0	R04535	(3R)-3-Hydroxybutanoyl-[acyl-carrier-protein] hydro-lyase	0
R07639 decenoyl-[acyl-carrier-protein] Delta2-trans-Delta3-cis-isomerase	trans-dec-2-enoyl-[acp][c] <==> cis-dec-3-enoyl-[acp][c]	trans-dec-2-enoyl-[acp][c] <=> cis-dec-3-enoyl-[acp][c]	-1000	1000	0	R07639	decenoyl-[acyl-carrier-protein] Delta2-trans-Delta3-cis-isomerase	1
R04962 decanoyl-[acp]:Natp+ trans-2-oxidoreductase	decanoyl-[acp][c] + natp+[c] <==> h+[c] + natph+[c]+ trans-dec-2-enoyl-[acp][c]	decanoyl-[acp][c] + natp+[c] <=> h+[c] + natph+[c]+ trans-dec-2-enoyl-[acp][c]	-1000	1000	0	R04962	decanoyl-[acp]:Natp+ trans-2-oxidoreductase	0
R08158 decanoyl-[acyl-carrier protein] hydrolase	decanoyl-[acp][c] + h2o[c] <==> acyl-carrier protein[c] + decanoic acid[c]	decanoyl-[acp][c] + h2o[c] <=> acyl-carrier protein[c] + decanoic acid[c]	-1000	1000	0	R08158	decanoyl-[acyl-carrier protein] hydrolase	1
R04963 Decanoyl-[acyl-carrier protein]:malonyl-[acyl-carrier-protein] C-acyltransferase (decarboxylating)	decanoyl-[acp][c] + malonyl-[acyl-carrier protein][c] <==> 3-oxododecanoyl-[acp][c] + acyl-carrier protein[c] + co2[c]	decanoyl-[acp][c] + malonyl-[acyl-carrier protein][c] <=> 3-oxododecanoyl-[acp][c] + acyl-carrier protein[c] + co2[c]	-1000	1000	0	R04963	Decanoyl-[acyl-carrier protein]:malonyl-[acyl-carrier-protein] C-acyltransferase (decarboxylating)	0
R04964 (3R)-3-Hydroxydodecanoyl-[acyl-carrier-protein]:Natp+ oxidoreductase	natp+[c] + (r)-3-hydroxydodecanoyl-[acp][c] <==> 3-oxododecanoyl-[acp][c] + h+[c] + natph[c]	natp+[c] + (r)-3-hydroxydodecanoyl-[acp][c] <=> 3-oxododecanoyl-[acp][c] + h+[c] + natph[c]	-1000	1000	0	R04964	(3R)-3-Hydroxydodecanoyl-[acyl-carrier-protein]:Natp+ oxidoreductase	0
R04965 (3R)-3-Hydroxybutanoyl-[acyl-carrier-protein] hydro-lyase	(r)-3-hydroxydodecanoyl-[acp][c] <==> h2o[c] + trans-dodec-2-enoyl-[acp][c]	(r)-3-hydroxydodecanoyl-[acp][c] <=> h2o[c] + trans-dodec-2-enoyl-[acp][c]	-1000	1000	0	R04965	(3R)-3-Hydroxybutanoyl-[acyl-carrier-protein] hydro-lyase	0
R04725 dodecanoyl-[acp]:Natp+ trans-2-oxidoreductase	dodecanoyl-[acyl-carrier protein][c] + natp+[c] <==> h+[c] + natph+[c]+ trans-dodec-2-enoyl-[acp][c]	dodecanoyl-[acyl-carrier protein][c] + natp+[c] <=> h+[c] + natph+[c]+ trans-dodec-2-enoyl-[acp][c]	-1000	1000	0	R04725	dodecanoyl-[acp]:Natp+ trans-2-oxidoreductase	0
R04014 dodecanoyl-[acyl-carrier-protein] hydrolase	dodecanoyl-[acyl-carrier protein][c] + h2o[c] <==> acyl-carrier protein[c] + dodecanoic acid[c]	dodecanoyl-[acyl-carrier protein][c] + h2o[c] <=> acyl-carrier protein[c] + dodecanoic acid[c]	-1000	1000	0	R04014	dodecanoyl-[acyl-carrier-protein] hydrolase	1
R04726 dodecanoyl-[acyl-carrier-protein]:malonyl-[acyl-carrier-protein] C-acyltransferase (decarboxylating)	dodecanoyl-[acyl-carrier protein][c] + malonyl-[acyl-carrier protein][c] <==> 3-oxotetradecanoyl-[acp][c] + acyl-carrier protein[c] + co2[c]	dodecanoyl-[acyl-carrier protein][c] + malonyl-[acyl-carrier protein][c] <=> 3-oxotetradecanoyl-[acp][c] + acyl-carrier protein[c] + co2[c]	-1000	1000	0	R04726	dodecanoyl-[acyl-carrier-protein]:malonyl-[acyl-carrier-protein] C-acyltransferase (decarboxylating)	0
R04566 (3R)-3-Hydroxytetradecanoyl-[acyl-carrier-protein]:Natp+ oxidoreductase	(3r)-3-hydroxytetradecanoyl-[acyl-carrier protein][c] + natp+[c] <==> 3-oxotetradecanoyl-[acp][c] + h+[c] + natph[c]	(3r)-3-hydroxytetradecanoyl-[acyl-carrier protein][c] + natp+[c] <=> 3-oxotetradecanoyl-[acp][c] + h+[c] + natph[c]	-1000	1000	0	R04566	(3R)-3-Hydroxytetradecanoyl-[acyl-carrier-protein]:Natp+ oxidoreductase	0
R04568 (3R)-3-Hydroxypalmitoyl-[acyl-carrier-protein] hydro-lyase	(3r)-3-hydroxytetradecanoyl-[acyl-carrier protein][c] <==> h2o[c] + trans-tetradec-2-enoyl-[acp][c]	(3r)-3-hydroxytetradecanoyl-[acyl-carrier protein][c] <=> h2o[c] + trans-tetradec-2-enoyl-[acp][c]	-1000	1000	0	R04568	(3R)-3-Hydroxypalmitoyl-[acyl-carrier-protein] hydro-lyase	0
R04967 tetradecanoyl-[acp]:Natp+ trans-2-oxidoreductase	natp+[c] + tetradecanoyl-[acp][c] <==> h+[c] + natph+[c]+ trans-tetradec-2-enoyl-[acp][c]	natp+[c] + tetradecanoyl-[acp][c] <=> h+[c] + natph+[c]+ trans-tetradec-2-enoyl-[acp][c]	-1000	1000	0	R04967	tetradecanoyl-[acp]:Natp+ trans-2-oxidoreductase	0
R08159 tetradecanoyl-[acyl-carrier protein] hydrolase	h2o[c] + tetradecanoyl-[acp][c] <==> acyl-carrier protein[c] + tetradecanoic acid[c]	h2o[c] + tetradecanoyl-[acp][c] <=> acyl-carrier protein[c] + tetradecanoic acid[c]	-1000	1000	0	R08159	tetradecanoyl-[acyl-carrier protein] hydrolase	1
R04968 Tetradecanoyl-[acyl-carrier protein]:malonyl-[acyl-carrier-protein] C-acyltransferase (decarboxylating)	malonyl-[acyl-carrier protein][c] + tetradecanoyl-[acp][c] <==> 3-oxohexadecanoyl-[acp][c] + acyl-carrier protein[c] + co2[c]	malonyl-[acyl-carrier protein][c] + tetradecanoyl-[acp][c] <=> 3-oxohexadecanoyl-[acp][c] + acyl-carrier protein[c] + co2[c]	-1000	1000	0	R04968	Tetradecanoyl-[acyl-carrier protein]:malonyl-[acyl-carrier-protein] C-acyltransferase (decarboxylating)	0
R04543 (3R)-3-Hydroxypalmitoyl-[acyl-carrier-protein]:Natp+ oxidoreductase	(3r)-3-hydroxypalmitoyl-[acyl-carrier protein][c] + natp+[c] <==> 3-oxohexadecanoyl-[acp][c] + h+[c] + natph[c]	(3r)-3-hydroxypalmitoyl-[acyl-carrier protein][c] + natp+[c] <=> 3-oxohexadecanoyl-[acp][c] + h+[c] + natph[c]	-1000	1000	0	R04543	(3R)-3-Hydroxypalmitoyl-[acyl-carrier-protein]:Natp+ oxidoreductase	0
R04544 (3R)-3-hydroxypalmitoyl-[acyl-carrier-protein] hydro-lyase	(3r)-3-hydroxypalmitoyl-[acyl-carrier protein][c] <==> h2o[c] + trans-hexadec-2-enoyl-[acp][c]	(3r)-3-hydroxypalmitoyl-[acyl-carrier protein][c] <=> h2o[c] + trans-hexadec-2-enoyl-[acp][c]	-1000	1000	0	R04544	(3R)-3-hydroxypalmitoyl-[acyl-carrier-protein] hydro-lyase	0
R04970 hexadecanoyl-[acp]:Natp+ trans-2-oxidoreductase	hexadecanoyl-[acp][c] + natp+[c] <==> h+[c] + natph+[c]+ trans-hexadec-2-enoyl-[acp][c]	hexadecanoyl-[acp][c] + natp+[c] <=> h+[c] + natph+[c]+ trans-hexadec-2-enoyl-[acp][c]	-1000	1000	0	R04970	hexadecanoyl-[acp]:Natp+ trans-2-oxidoreductase	0
R01706 hexadecanoyl-[acyl-carrier protein] hydrolase	h2o[c] + hexadecanoyl-[acp][c] <==> acyl-carrier protein[c] + hexadecanoic acid[c]	h2o[c] + hexadecanoyl-[acp][c] <=> acyl-carrier protein[c] + hexadecanoic acid[c]	-1000	1000	0	R01706	hexadecanoyl-[acyl-carrier protein] hydrolase	0
R10700 palmitoyl-[acp]:CoA S-palmitoyltransferase	coa[c] + hexadecanoyl-[acp][c] <==> acyl-carrier protein[c] + palmitoyl-coa[c]	coa[c] + hexadecanoyl-[acp][c] <=> acyl-carrier protein[c] + palmitoyl-coa[c]	-1000	1000	0	R10700	palmitoyl-[acp]:CoA S-palmitoyltransferase	0
R08161	hexadecanoyl-[acp][c] + oxygen[c] + reduced acceptor[c] <==> acceptor[c] + (2) h2o[c] + hexadecenoyl-[acyl-carrier protein][c]	hexadecanoyl-[acp][c] + oxygen[c] + reduced acceptor[c] <=> acceptor[c] + (2) h2o[c] + hexadecenoyl-[acyl-carrier protein][c]	-1000	1000	0	R08161		0
R08162 hexadecenoyl-[acyl-carrier protein] hydrolase	h2o[c] + hexadecenoyl-[acyl-carrier protein][c] <==> (9z)-hexadecenoic acid[c] + acyl-carrier protein[c]	h2o[c] + hexadecenoyl-[acyl-carrier protein][c] <=> (9z)-hexadecenoic acid[c] + acyl-carrier protein[c]	-1000	1000	0	R08162	hexadecenoyl-[acyl-carrier protein] hydrolase	1
R07762	hexadecanoyl-[acp][c] + malonyl-[acyl-carrier protein][c] <==> 3-oxostearoyl-[acp][c] + acyl-carrier protein[c] + co2[c]	hexadecanoyl-[acp][c] + malonyl-[acyl-carrier protein][c] <=> 3-oxostearoyl-[acp][c] + acyl-carrier protein[c] + co2[c]	-1000	1000	0	R07762		0
R07763	3-oxostearoyl-[acp][c] + h+[c] + natph+[c]<==> natp+[c] + (r)-3-hydroxyoctadecanoyl-[acp][c]	3-oxostearoyl-[acp][c] + h+[c] + natph+[c]<=> natp+[c] + (r)-3-hydroxyoctadecanoyl-[acp][c]	-1000	1000	0	R07763		0
R07764	(r)-3-hydroxyoctadecanoyl-[acp][c] <==> (2e)-octadecenoyl-[acp][c] + h2o[c]	(r)-3-hydroxyoctadecanoyl-[acp][c] <=> (2e)-octadecenoyl-[acp][c] + h2o[c]	-1000	1000	0	R07764		0
R07765 octadecanoyl-[acp]:NAD+ trans-2-oxidoreductase	(2e)-octadecenoyl-[acp][c] + h+[c] + nadh+[c]<==> nad+[c] + octadecanoyl-[acyl-carrier protein][c]	(2e)-octadecenoyl-[acp][c] + h+[c] + nadh+[c]<=> nad+[c] + octadecanoyl-[acyl-carrier protein][c]	-1000	1000	0	R07765	octadecanoyl-[acp]:NAD+ trans-2-oxidoreductase	0
R08163 octadecanoyl-[acyl-carrier protein] hydrolase	h2o[c] + octadecanoyl-[acyl-carrier protein][c] <==> acyl-carrier protein[c] + octadecanoic acid[c]	h2o[c] + octadecanoyl-[acyl-carrier protein][c] <=> acyl-carrier protein[c] + octadecanoic acid[c]	-1000	1000	0	R08163	octadecanoyl-[acyl-carrier protein] hydrolase	1
R03370 Acyl-[acyl-carrier-protein],hydrogen-donor:oxygen oxidoreductase	octadecanoyl-[acyl-carrier protein][c] + oxygen[c] + reduced acceptor[c] <==> acceptor[c] + (2) h2o[c] + oleoyl-[acyl-carrier protein][c]	octadecanoyl-[acyl-carrier protein][c] + oxygen[c] + reduced acceptor[c] <=> acceptor[c] + (2) h2o[c] + oleoyl-[acyl-carrier protein][c]	-1000	1000	0	R03370	Acyl-[acyl-carrier-protein],hydrogen-donor:oxygen oxidoreductase	0
R02814 Oleoyl-[acyl-carrier-protein] hydrolase	h2o[c] + oleoyl-[acyl-carrier protein][c] <==> (9z)-octadecenoic acid[c] + acyl-carrier protein[c]	h2o[c] + oleoyl-[acyl-carrier protein][c] <=> (9z)-octadecenoic acid[c] + acyl-carrier protein[c]	-1000	1000	0	R02814	Oleoyl-[acyl-carrier-protein] hydrolase	1
R00286 Pentose and glucuronate interconversions - DP-glucose:NAD+ 6-oxidoreductase	h2o[c] + (2) nad+[c] + udp-glucose[c] <==> (2) h+[c] + (2) nadh+[c]+ udp-glucuronate[c]	h2o[c] + (2) nad+[c] + udp-glucose[c] <=> (2) h+[c] + (2) nadh+[c]+ udp-glucuronate[c]	-1000	1000	0	R00286	Pentose and glucuronate interconversions - DP-glucose:NAD+ 6-oxidoreductase	0
R00289 Pentose and glucuronate interconversions -UTP:alpha-D-glucose-1-phosphate uridylyltransferase	d-glucose 1-phosphate[c] + utp[c] <==> diphosphate[c] + udp-glucose[c]	d-glucose 1-phosphate[c] + utp[c] <=> diphosphate[c] + udp-glucose[c]	-1000	1000	0	R00289	Pentose and glucuronate interconversions -UTP:alpha-D-glucose-1-phosphate uridylyltransferase	0
R00502 Pentose and glucuronate interconversions -UTP:alpha-D-galactose-1-phosphate uridylyltransferase	alpha-d-galactose 1-phosphate[c] + utp[c] <==> diphosphate[c] + udp-alpha-d-galactose[c]	alpha-d-galactose 1-phosphate[c] + utp[c] <=> diphosphate[c] + udp-alpha-d-galactose[c]	-1000	1000	0	R00502	Pentose and glucuronate interconversions -UTP:alpha-D-galactose-1-phosphate uridylyltransferase	1
R01381 Pentose and glucuronate interconversions_UTP:1-phospho-alpha-D-glucuronate uridylyltransferase	d-glucuronate 1-phosphate[c] + utp[c] <==> diphosphate[c] + udp-glucuronate[c]	d-glucuronate 1-phosphate[c] + utp[c] <=> diphosphate[c] + udp-glucuronate[c]	-1000	1000	0	R01381	Pentose and glucuronate interconversions_UTP:1-phospho-alpha-D-glucuronate uridylyltransferase	1
R01471 Pentose and glucuronate interconversions_UTP:alpha-D-xylose-1-phosphate uridylyltransferase	alpha-d-xylose 1-phosphate[c] + utp[c] <==> diphosphate[c] + udp-d-xylose[c]	alpha-d-xylose 1-phosphate[c] + utp[c] <=> diphosphate[c] + udp-d-xylose[c]	-1000	1000	0	R01471	Pentose and glucuronate interconversions_UTP:alpha-D-xylose-1-phosphate uridylyltransferase	1
R03077 UTP:beta-L-arabinose-1-phosphate uridylyltransferase	beta-l-arabinose 1-phosphate[c] + utp[c] <==> diphosphate[c] + udp-l-arabinose[c]	beta-l-arabinose 1-phosphate[c] + utp[c] <=> diphosphate[c] + udp-l-arabinose[c]	-1000	1000	0	R03077	UTP:beta-L-arabinose-1-phosphate uridylyltransferase	1
R08845 Pentose and glucuronate interconversions - Aldehyde:NAD+ oxidoreductase UTP:monosaccharide-1-phosphate uridylyltransferase	alpha-d-aldose 1-phosphate[c] + utp[c] <==> diphosphate[c] + udp-sugar[c]	alpha-d-aldose 1-phosphate[c] + utp[c] <=> diphosphate[c] + udp-sugar[c]	-1000	1000	0	R08845	Pentose and glucuronate interconversions - Aldehyde:NAD+ oxidoreductase UTP:monosaccharide-1-phosphate uridylyltransferase	1
R00538 Pentose and glucuronate interconversions - Aldehyde:NAD+ oxidoreductase	aldehyde[c] + h2o[c] + nad+[c] <==> carboxylate[c] + h+[c] + nadh[c]	aldehyde[c] + h2o[c] + nad+[c] <=> carboxylate[c] + h+[c] + nadh[c]	-1000	1000	0	R00538	Pentose and glucuronate interconversions - Aldehyde:NAD+ oxidoreductase	0
R01529 Pentose and glucuronate interconversions - D-Ribulose-5-phosphate 3-epimerase	d-ribulose 5-phosphate[c] <==> d-xylulose 5-phosphate[c]	d-ribulose 5-phosphate[c] <=> d-xylulose 5-phosphate[c]	-1000	1000	0	R01529	Pentose and glucuronate interconversions - D-Ribulose-5-phosphate 3-epimerase	0
R00631 Pentose and glucuronate interconversions - aldehyde:NAD+ oxidoreductase	aldehyde[c] + h2o[c] + nad+[c] <==> fatty acid[c] + h+[c] + nadh[c]	aldehyde[c] + h2o[c] + nad+[c] <=> fatty acid[c] + h+[c] + nadh[c]	-1000	1000	0	R00631	Pentose and glucuronate interconversions - aldehyde:NAD+ oxidoreductase	0
R00710 Pentose and glucuronate interconversions - Acetaldehyde:NAD+ oxidoreductase	acetaldehyde[c] + h2o[c] + nad+[c] <==> Acetate[c] + h+[c] + nadh[c]	acetaldehyde[c] + h2o[c] + nad+[c] <=> Acetate[c] + h+[c] + nadh[c]	-1000	1000	0	R00710	Pentose and glucuronate interconversions - Acetaldehyde:NAD+ oxidoreductase	0
R00904 Pentose and glucuronate interconversions - 3-aminopropanal:NAD+ oxidoreductase	3-aminopropanal[c] + h2o[c] + nad+[c] <==> beta-alanine[c] + h+[c] + nadh[c]	3-aminopropanal[c] + h2o[c] + nad+[c] <=> beta-alanine[c] + h+[c] + nadh[c]	-1000	1000	0	R00904	Pentose and glucuronate interconversions - 3-aminopropanal:NAD+ oxidoreductase	1
R01752 Pentose and glucuronate interconversions - D-Glyceraldehyde:NAD+ oxidoreductase	d-glyceraldehyde[c] + h2o[c] + nad+[c] <==> d-glycerate[c] + h+[c] + nadh[c]	d-glyceraldehyde[c] + h2o[c] + nad+[c] <=> d-glycerate[c] + h+[c] + nadh[c]	-1000	1000	0	R01752	Pentose and glucuronate interconversions - D-Glyceraldehyde:NAD+ oxidoreductase	0
R02549 Pentose and glucuronate interconversions -4-aminobutanal:NAD+ 1-oxidoreductase; 4-aminobutyraldehyde:NAD+ oxidoreductase	4-aminobutyraldehyde[c] + h2o[c] + nad+[c] <==> 4-aminobutanoate[c] + h+[c] + nadh[c]	4-aminobutyraldehyde[c] + h2o[c] + nad+[c] <=> 4-aminobutanoate[c] + h+[c] + nadh[c]	-1000	1000	0	R02549	Pentose and glucuronate interconversions -4-aminobutanal:NAD+ 1-oxidoreductase; 4-aminobutyraldehyde:NAD+ oxidoreductase	0
R02678 Pentose and glucuronate interconversions - Indole-3-acetaldehyde:NAD+ oxidoreductase	h2o[c] + indole-3-acetaldehyde[c] + nad+[c] <==> h+[c] + indole-3-acetate[c] + nadh[c]	h2o[c] + indole-3-acetaldehyde[c] + nad+[c] <=> h+[c] + indole-3-acetate[c] + nadh[c]	-1000	1000	0	R02678	Pentose and glucuronate interconversions - Indole-3-acetaldehyde:NAD+ oxidoreductase	1
R02940 Pentose and glucuronate interconversions - 2-Propyn-1-al:NAD+ oxidoreductase	2-propynal[c] + h2o[c] + nad+[c] <==> h+[c] + nadh+[c]+ propynoate[c]	2-propynal[c] + h2o[c] + nad+[c] <=> h+[c] + nadh+[c]+ propynoate[c]	-1000	1000	0	R02940	Pentose and glucuronate interconversions - 2-Propyn-1-al:NAD+ oxidoreductase	1
R03283 Pentose and glucuronate interconversions - 4-Trimethylammoniobutanal:NAD+ 1-oxidoreductase; 4-Trimethylammoniobutanal:NAD+ oxidoreductase	4-trimethylammoniobutanal[c] + h2o[c] + nad+[c] <==> 4-trimethylammoniobutanoate[c] + h+[c] + nadh[c]	4-trimethylammoniobutanal[c] + h2o[c] + nad+[c] <=> 4-trimethylammoniobutanoate[c] + h+[c] + nadh[c]	-1000	1000	0	R03283	Pentose and glucuronate interconversions - 4-Trimethylammoniobutanal:NAD+ 1-oxidoreductase; 4-Trimethylammoniobutanal:NAD+ oxidoreductase	1
R03869 Pentose and glucuronate interconversions - (S)-Methylmalonate semialdehyde:NAD+ oxidoreductase	h2o[c] + nad+[c] + (s)-methylmalonate semialdehyde[c] <==> h+[c] + methylmalonate[c] + nadh[c]	h2o[c] + nad+[c] + (s)-methylmalonate semialdehyde[c] <=> h+[c] + methylmalonate[c] + nadh[c]	-1000	1000	0	R03869	Pentose and glucuronate interconversions - (S)-Methylmalonate semialdehyde:NAD+ oxidoreductase	1
R04065 Pentose and glucuronate interconversions - Imidazole acetaldehyde:NAD+ oxidoreductase	h2o[c] + imidazole-4-acetaldehyde[c] + nad+[c] <==> h+[c] + imidazole-4-acetate[c] + nadh[c]	h2o[c] + imidazole-4-acetaldehyde[c] + nad+[c] <=> h+[c] + imidazole-4-acetate[c] + nadh[c]	-1000	1000	0	R04065	Pentose and glucuronate interconversions - Imidazole acetaldehyde:NAD+ oxidoreductase	1
R04506 Pentose and glucuronate interconversions - 3alpha,7alpha-Dihydroxy-5beta-cholestan-26-al:NAD+ oxidoreductase	3alpha,7alpha-dihydroxy-5beta-cholestan-26-al[c] + h2o[c] + nad+[c] <==> 3alpha,7alpha-dihydroxy-5beta-cholestanate[c] + h+[c] + nadh[c]	3alpha,7alpha-dihydroxy-5beta-cholestan-26-al[c] + h2o[c] + nad+[c] <=> 3alpha,7alpha-dihydroxy-5beta-cholestanate[c] + h+[c] + nadh[c]	-1000	1000	0	R04506	Pentose and glucuronate interconversions - 3alpha,7alpha-Dihydroxy-5beta-cholestan-26-al:NAD+ oxidoreductase	1
R04903 Pentose and glucuronate interconversions – 5-Hydroxyindoleacetaldehyde:NAD+ oxidoreductase	5-hydroxyindoleacetaldehyde[c] + h2o[c] + nad+[c] <==> 5-hydroxyindoleacetate[c] + h+[c] + nadh[c]	5-hydroxyindoleacetaldehyde[c] + h2o[c] + nad+[c] <=> 5-hydroxyindoleacetate[c] + h+[c] + nadh[c]	-1000	1000	0	R04903	Pentose and glucuronate interconversions – 5-Hydroxyindoleacetaldehyde:NAD+ oxidoreductase	1
R05050 Pentose and glucuronate interconversions - N4-Acetylaminobutanal:NAD+ oxidoreductase	h2o[c] + n4-acetylaminobutanal[c] + nad+[c] <==> 4-acetamidobutanoate[c] + h+[c] + nadh[c]	h2o[c] + n4-acetylaminobutanal[c] + nad+[c] <=> 4-acetamidobutanoate[c] + h+[c] + nadh[c]	-1000	1000	0	R05050	Pentose and glucuronate interconversions - N4-Acetylaminobutanal:NAD+ oxidoreductase	1
R05286 Pentose and glucuronate interconversions – Chloroacetaldehyde:NAD+ oxidoreductase	chloroacetaldehyde[c] + h2o[c] + nad+[c] <==> chloroacetic acid[c] + h+[c] + nadh[c]	chloroacetaldehyde[c] + h2o[c] + nad+[c] <=> chloroacetic acid[c] + h+[c] + nadh[c]	-1000	1000	0	R05286	Pentose and glucuronate interconversions – Chloroacetaldehyde:NAD+ oxidoreductase	1
R06366 Pentose and glucuronate interconversions – Aldehyde:NAD+ oxidoreductase	h2o[c] + nad+[c] + perillyl aldehyde[c] <==> h+[c] + nadh+[c]+ perillic acid[c]	h2o[c] + nad+[c] + perillyl aldehyde[c] <=> h+[c] + nadh+[c]+ perillic acid[c]	-1000	1000	0	R06366	Pentose and glucuronate interconversions – Aldehyde:NAD+ oxidoreductase	1
R00264 Pentose and glucuronate interconversions - 2,5-dioxopentanoate:Natp+ 5-oxidoreductase	2,5-dioxopentanoate[c] + h2o[c] + natp+[c] <==> 2-oxoglutarate[c] + h+[c] + natph[c]	2,5-dioxopentanoate[c] + h2o[c] + natp+[c] <=> 2-oxoglutarate[c] + h+[c] + natph[c]	-1000	1000	0	R00264	Pentose and glucuronate interconversions - 2,5-dioxopentanoate:Natp+ 5-oxidoreductase	1
R01986 Pentose and glucuronate interconversions - 4-Aminobutyraldehyde:NAD+ oxidoreductase	4-aminobutyraldehyde[c] + h2o[c] + natp+[c] <==> 4-aminobutanoate[c] + h+[c] + natph[c]	4-aminobutyraldehyde[c] + h2o[c] + natp+[c] <=> 4-aminobutanoate[c] + h+[c] + natph[c]	-1000	1000	0	R01986	Pentose and glucuronate interconversions - 4-Aminobutyraldehyde:NAD+ oxidoreductase	0
R02957 Pentose and glucuronate interconversions - D-Glucuronolactone:NAD+ oxidoreductase	d-glucuronolactone[c] + (2) h2o[c] + nad+[c] <==> d-glucarate[c] + h+[c] + nadh[c]	d-glucuronolactone[c] + (2) h2o[c] + nad+[c] <=> d-glucarate[c] + h+[c] + nadh[c]	-1000	1000	0	R02957	Pentose and glucuronate interconversions - D-Glucuronolactone:NAD+ oxidoreductase	1
R05237 Pentose and glucuronate interconversions -	h2o[c] + trans-3-chloroallyl aldehyde[c] <==> (2) h+[c] + trans-3-chloroacrylic acid[c]	h2o[c] + trans-3-chloroallyl aldehyde[c] <=> (2) h+[c] + trans-3-chloroacrylic acid[c]	-1000	1000	0	R05237	Pentose and glucuronate interconversions -	1
R05238 Pentose and glucuronate interconversions -	cis-3-chloroallyl aldehyde[c] + h2o[c] <==> cis-3-chloroacrylic acid[c] + (2) h+[c]	cis-3-chloroallyl aldehyde[c] + h2o[c] <=> cis-3-chloroacrylic acid[c] + (2) h+[c]	-1000	1000	0	R05238	Pentose and glucuronate interconversions -	1
R00760 Fructose and mannose metabolism_atp:D-fructose 6-phosphotransferase	atp[c] + d-fructose[c] <==> atp[c] + d-fructose 6-phosphate[c]	atp[c] + d-fructose[c] <=> atp[c] + d-fructose 6-phosphate[c]	-1000	1000	0	R00760	Fructose and mannose metabolism_atp:D-fructose 6-phosphotransferase	0
R09030 Fructose and mannose metabolism_D-allose-6-phosphate aldose-ketose-isomerase	d-allose 6-phosphate[c] <==> d-allulose 6-phosphate[c]	d-allose 6-phosphate[c] <=> d-allulose 6-phosphate[c]	-1000	1000	0	R09030	Fructose and mannose metabolism_D-allose-6-phosphate aldose-ketose-isomerase	1
R01818 Fructose and mannose metabolism_ D-mannose 6-phosphate 1,6-phosphomutase	d-mannose 6-phosphate[c] <==> d-mannose 1-phosphate[c]	d-mannose 6-phosphate[c] <=> d-mannose 1-phosphate[c]	-1000	1000	0	R01818	Fructose and mannose metabolism_ D-mannose 6-phosphate 1,6-phosphomutase	0
R00867 Fructose and mannose metabolism_atp:D-fructose 6-phosphotransferase	atp[c] + d-fructose[c] <==> atp[c] + beta-d-fructose 6-phosphate[c]	atp[c] + d-fructose[c] <=> atp[c] + beta-d-fructose 6-phosphate[c]	-1000	1000	0	R00867	Fructose and mannose metabolism_atp:D-fructose 6-phosphotransferase	0
R01819 Fructose and mannose metabolism_D-mannose-6-phosphate aldose-ketose-isomerase	d-mannose 6-phosphate[c] <==> beta-d-fructose 6-phosphate[c]	d-mannose 6-phosphate[c] <=> beta-d-fructose 6-phosphate[c]	-1000	1000	0	R01819	Fructose and mannose metabolism_D-mannose-6-phosphate aldose-ketose-isomerase	0
R03920 Fructose and mannose metabolism_D-mannose 6-phosphate 1,6-phosphomutase	atp[c] + beta-d-fructose[c] <==> atp[c] + beta-d-fructose 6-phosphate[c]	atp[c] + beta-d-fructose[c] <=> atp[c] + beta-d-fructose 6-phosphate[c]	-1000	1000	0	R03920	Fructose and mannose metabolism_D-mannose 6-phosphate 1,6-phosphomutase	0
R00772 Fructose and mannose metabolism_D-mannose-6-phosphate aldose-ketose-isomerase	d-mannose 6-phosphate[c] <==> d-fructose 6-phosphate[c]	d-mannose 6-phosphate[c] <=> d-fructose 6-phosphate[c]	-1000	1000	0	R00772	Fructose and mannose metabolism_D-mannose-6-phosphate aldose-ketose-isomerase	0
R00756 Fructose and mannose metabolism_atp:D-fructose-6-phosphate 1-phosphotransferase	atp[c] + d-fructose 6-phosphate[c] <==> atp[c] + d-fructose 1,6-bisphosphate[c]	atp[c] + d-fructose 6-phosphate[c] <=> atp[c] + d-fructose 1,6-bisphosphate[c]	-1000	1000	0	R00756	Fructose and mannose metabolism_atp:D-fructose-6-phosphate 1-phosphotransferase	0
R00767 Fructose and mannose metabolism_CTP:D-fructose-6-phosphate 1-phosphotransferase	ctp[c] + d-fructose 6-phosphate[c] <==> cdp[c] + d-fructose 1,6-bisphosphate[c]	ctp[c] + d-fructose 6-phosphate[c] <=> cdp[c] + d-fructose 1,6-bisphosphate[c]	-1000	1000	0	R00767	Fructose and mannose metabolism_CTP:D-fructose-6-phosphate 1-phosphotransferase	0
R00769 Fructose and mannose metabolism_UTP:D-fructose-6-phosphate 1-phosphotransferase	d-fructose 6-phosphate[c] + utp[c] <==> d-fructose 1,6-bisphosphate[c] + udp[c]	d-fructose 6-phosphate[c] + utp[c] <=> d-fructose 1,6-bisphosphate[c] + udp[c]	-1000	1000	0	R00769	Fructose and mannose metabolism_UTP:D-fructose-6-phosphate 1-phosphotransferase	0
R00770 Fructose and mannose metabolism_ITP:D-fructose-6-phosphate 1-phosphotransferase	d-fructose 6-phosphate[c] + itp[c] <==> d-fructose 1,6-bisphosphate[c] + idp[c]	d-fructose 6-phosphate[c] + itp[c] <=> d-fructose 1,6-bisphosphate[c] + idp[c]	-1000	1000	0	R00770	Fructose and mannose metabolism_ITP:D-fructose-6-phosphate 1-phosphotransferase	0
R01843 Fructose and mannose metabolism_atp:Sedoheptulose 7-phosphate 1-phosphotransferase	atp[c] + sedoheptulose 7-phosphate[c] <==> atp[c] + sedoheptulose 1,7-bisphosphate[c]	atp[c] + sedoheptulose 7-phosphate[c] <=> atp[c] + sedoheptulose 1,7-bisphosphate[c]	-1000	1000	0	R01843	Fructose and mannose metabolism_atp:Sedoheptulose 7-phosphate 1-phosphotransferase	0
R03236 Fructose and mannose metabolism_atp:D-tagatose-6-phosphate 1-phosphotransferase	atp[c] + d-tagatose 6-phosphate[c] <==> atp[c] + d-tagatose 1,6-bisphosphate[c]	atp[c] + d-tagatose 6-phosphate[c] <=> atp[c] + d-tagatose 1,6-bisphosphate[c]	-1000	1000	0	R03236	Fructose and mannose metabolism_atp:D-tagatose-6-phosphate 1-phosphotransferase	0
R03237 Fructose and mannose metabolism_CTP:D-tagatose 6-phosphate 1-phosphotransferase	ctp[c] + d-tagatose 6-phosphate[c] <==> cdp[c] + d-tagatose 1,6-bisphosphate[c]	ctp[c] + d-tagatose 6-phosphate[c] <=> cdp[c] + d-tagatose 1,6-bisphosphate[c]	-1000	1000	0	R03237	Fructose and mannose metabolism_CTP:D-tagatose 6-phosphate 1-phosphotransferase	0
R03238 Fructose and mannose metabolism_UTP:D-tagatose 6-phosphate 1-phosphotransferase	d-tagatose 6-phosphate[c] + utp[c] <==> d-tagatose 1,6-bisphosphate[c] + udp[c]	d-tagatose 6-phosphate[c] + utp[c] <=> d-tagatose 1,6-bisphosphate[c] + udp[c]	-1000	1000	0	R03238	Fructose and mannose metabolism_UTP:D-tagatose 6-phosphate 1-phosphotransferase	0
R03239 Fructose and mannose metabolism_ITP:D-tagatose 6-phosphate 1-phosphotransferase	d-tagatose 6-phosphate[c] + itp[c] <==> d-tagatose 1,6-bisphosphate[c] + idp[c]	d-tagatose 6-phosphate[c] + itp[c] <=> d-tagatose 1,6-bisphosphate[c] + idp[c]	-1000	1000	0	R03239	Fructose and mannose metabolism_ITP:D-tagatose 6-phosphate 1-phosphotransferase	0
R00885 Fructose and mannose metabolism_GTP:alpha-D-mannose-1-phosphate guanylyltransferase	d-mannose 1-phosphate[c] + gtp[c] <==> diphosphate[c] + gdp-mannose[c]	d-mannose 1-phosphate[c] + gtp[c] <=> diphosphate[c] + gdp-mannose[c]	-1000	1000	0	R00885	Fructose and mannose metabolism_GTP:alpha-D-mannose-1-phosphate guanylyltransferase	0
R02568 Fructose and mannose metabolism_D-fructose 1-phosphate D-glyceraldehyde-3-phosphate-lyase	d-fructose 1-phosphate[c] <==> d-glyceraldehyde[c] + glycerone phosphate[c]	d-fructose 1-phosphate[c] <=> d-glyceraldehyde[c] + glycerone phosphate[c]	-1000	1000	0	R02568	Fructose and mannose metabolism_D-fructose 1-phosphate D-glyceraldehyde-3-phosphate-lyase	1
R01602 Galactose metabolism_D-glucose 1-epimerase	alpha-d-glucose[c] <==> beta-d-glucose[c]	alpha-d-glucose[c] <=> beta-d-glucose[c]	-1000	1000	0	R01602	Galactose metabolism_D-glucose 1-epimerase	0
R01105 Galactose metabolism_Galactan galactohydrolase	galactan[c] + h2o[c] <==> d-galactose[c] + galactan[c]	galactan[c] + h2o[c] <=> d-galactose[c] + galactan[c]	-1000	1000	0	R01105	Galactose metabolism_Galactan galactohydrolase	0
R01678 Galactose metabolism_Lactose galactohydrolase	h2o[c] + lactose[c] <==> alpha-d-glucose[c] + d-galactose[c]	h2o[c] + lactose[c] <=> alpha-d-glucose[c] + d-galactose[c]	-1000	1000	0	R01678	Galactose metabolism_Lactose galactohydrolase	0
R03355 Galactose metabolism_beta-D-Galactosyl-1,4-beta-D-glucosylceramide galactohydrolase	beta-d-galactosyl-(1_>4)-beta-d-glucosyl-(1<_>1)-ceramide[c] + h2o[c] <==> beta-d-glucosyl-(1<_>1)-ceramide[c] + d-galactose[c]	beta-d-galactosyl-(1_>4)-beta-d-glucosyl-(1<_>1)-ceramide[c] + h2o[c] <=> beta-d-glucosyl-(1<_>1)-ceramide[c] + d-galactose[c]	-1000	1000	0	R03355	Galactose metabolism_beta-D-Galactosyl-1,4-beta-D-glucosylceramide galactohydrolase	1
R04633 Galactose metabolism_D-Galactosyl-N-acetyl-D-galactosaminyl-(N-acetylneuraminyl)-D- galactosyl-D-glucosylceramide galactohydrolase	d-galactosyl-n-acetyl-d-galactosaminyl-(n-acetylneuraminyl)-d-galactosyl-d-glucosylceramide[c] + h2o[c] <==> d-galactose[c] + n-acetyl-d-galactosaminyl-(n-acetylneuraminyl)-d-galactosyl-d-glucosylceramide[c]	d-galactosyl-n-acetyl-d-galactosaminyl-(n-acetylneuraminyl)-d-galactosyl-d-glucosylceramide[c] + h2o[c] <=> d-galactose[c] + n-acetyl-d-galactosaminyl-(n-acetylneuraminyl)-d-galactosyl-d-glucosylceramide[c]	-1000	1000	0	R04633	Galactose metabolism_D-Galactosyl-N-acetyl-D-galactosaminyl-(N-acetylneuraminyl)-D- galactosyl-D-glucosylceramide galactohydrolase	1
R04783 Galactose metabolism_3-Ketolactose galactohydrolase	3-ketolactose[c] + h2o[c] <==> 3-keto-beta-d-galactose[c] + beta-d-glucose[c]	3-ketolactose[c] + h2o[c] <=> 3-keto-beta-d-galactose[c] + beta-d-glucose[c]	-1000	1000	0	R04783	Galactose metabolism_3-Ketolactose galactohydrolase	0
R05112 Galactose metabolism_Gal-beta1->3GalNAc-beta1->4Gal-beta1->4Glc-beta1->1'Cer galactohydrolase	ga1[c] + h2o[c] <==> d-galactose[c] + ga2[c]	ga1[c] + h2o[c] <=> d-galactose[c] + ga2[c]	-1000	1000	0	R05112	Galactose metabolism_Gal-beta1->3GalNAc-beta1->4Gal-beta1->4Glc-beta1->1'Cer galactohydrolase	1
R06010 Galactose metabolism_	gm1[c] + h2o[c] <==> d-galactose[c] + gm2[c]	gm1[c] + h2o[c] <=> d-galactose[c] + gm2[c]	-1000	1000	0	R06010	Galactose metabolism_	1
R06099 Galactose metabolism_	h2o[c] + lactosylceramide[c] <==> d-galactose[c] + glucocerebroside[c]	h2o[c] + lactosylceramide[c] <=> d-galactose[c] + glucocerebroside[c]	-1000	1000	0	R06099	Galactose metabolism_	1
R06144 Galactose metabolism_	3-ketolactose[c] + h2o[c] <==> 3-keto-beta-d-galactose[c] + beta-d-glucose[c]	3-ketolactose[c] + h2o[c] <=> 3-keto-beta-d-galactose[c] + beta-d-glucose[c]	-1000	1000	0	R06144	Galactose metabolism_	0
R06202 Galactose metabolism_	g10534(n+1)[c] + h2o[c] <==> d-galactose[c] + g10534(n)[c]	g10534(n+1)[c] + h2o[c] <=> d-galactose[c] + g10534(n)[c]	-1000	1000	0	R06202	Galactose metabolism_	1
R07807 Galactose metabolism_	g01977[c] + h2o[c] <==> d-galactose[c] + g13073[c]	g01977[c] + h2o[c] <=> d-galactose[c] + g13073[c]	-1000	1000	0	R07807	Galactose metabolism_	1
R00291 Galactose metabolism_UDP-glucose 4-epimerase; UDP-alpha-D-glucose 4-epimerase	udp-glucose[c] <==> udp-alpha-d-galactose[c]	udp-glucose[c] <=> udp-alpha-d-galactose[c]	-1000	1000	0	R00291	Galactose metabolism_UDP-glucose 4-epimerase; UDP-alpha-D-glucose 4-epimerase	0
R01100 Galactose metabolism_Lactose galactohydrolase	h2o[c] + lactose[c] <==> d-galactose[c] + d-glucose[c]	h2o[c] + lactose[c] <=> d-galactose[c] + d-glucose[c]	-1000	1000	0	R01100	Galactose metabolism_Lactose galactohydrolase	0
R08639 Galactose metabolism_alpha-D-glucose 1,6-phosphomutase	d-glucose 1-phosphate[c] <==> d-glucose 6-phosphate[c]	d-glucose 1-phosphate[c] <=> d-glucose 6-phosphate[c]	-1000	1000	0	R08639	Galactose metabolism_alpha-D-glucose 1,6-phosphomutase	0
R00959 Galactose metabolism_	d-glucose 1-phosphate[c] <==> alpha-d-glucose 6-phosphate[c]	d-glucose 1-phosphate[c] <=> alpha-d-glucose 6-phosphate[c]	-1000	1000	0	R00959	Galactose metabolism_	0
R01057 Galactose metabolism_D-Ribose 1,5-phosphomutase	alpha-d-ribose 1-phosphate[c] <==> d-ribose 5-phosphate[c]	alpha-d-ribose 1-phosphate[c] <=> d-ribose 5-phosphate[c]	-1000	1000	0	R01057	Galactose metabolism_D-Ribose 1,5-phosphomutase	1
R01101 Galactose metabolism_melibiose galactohydrolase	h2o[c] + melibiose[c] <==> d-galactose[c] + d-glucose[c]	h2o[c] + melibiose[c] <=> d-galactose[c] + d-glucose[c]	-1000	1000	0	R01101	Galactose metabolism_melibiose galactohydrolase	0
R01103 Galactose metabolism_Raffinose galactohydrolase	h2o[c] + raffinose[c] <==> d-galactose[c] + sucrose[c]	h2o[c] + raffinose[c] <=> d-galactose[c] + sucrose[c]	-1000	1000	0	R01103	Galactose metabolism_Raffinose galactohydrolase	0
R01104 Galactose metabolism_Galactosylglycerol galactohydrolase	3-beta-d-galactosyl-sn-glycerol[c] + h2o[c] <==> d-galactose[c] + glycerol[c]	3-beta-d-galactosyl-sn-glycerol[c] + h2o[c] <=> d-galactose[c] + glycerol[c]	-1000	1000	0	R01104	Galactose metabolism_Galactosylglycerol galactohydrolase	1
R01194 Galactose metabolism_3-O-alpha-D-Galactosyl-1D-myo-inositol galactohydrolase; 1-alpha-D-Galactosyl-myo-inositol galactohydrolase	alpha-d-galactosyl-(1_>3)-1d-myo-inositol[c] + h2o[c] <==> d-galactose[c] + myo-inositol[c]	alpha-d-galactosyl-(1_>3)-1d-myo-inositol[c] + h2o[c] <=> d-galactose[c] + myo-inositol[c]	-1000	1000	0	R01194	Galactose metabolism_3-O-alpha-D-Galactosyl-1D-myo-inositol galactohydrolase; 1-alpha-D-Galactosyl-myo-inositol galactohydrolase	1
R01329 Galactose metabolism_Epimelibiose galactohydrolase	epimelibiose[c] + h2o[c] <==> d-galactose[c] + d-mannose[c]	epimelibiose[c] + h2o[c] <=> d-galactose[c] + d-mannose[c]	-1000	1000	0	R01329	Galactose metabolism_Epimelibiose galactohydrolase	1
R02926 Galactose metabolism_Melibiitol galactohydrolase	h2o[c] + melibiitol[c] <==> d-galactose[c] + d-sorbitol[c]	h2o[c] + melibiitol[c] <=> d-galactose[c] + d-sorbitol[c]	-1000	1000	0	R02926	Galactose metabolism_Melibiitol galactohydrolase	1
(1) R03618 Galactose metabolism_Trihexosylceramide galactohydrolase	alpha-d-galactosyl-(1_>4)-beta-d-galactosyl-(1_>4)-beta-d-glucosyl-(1<_>1)-ceramide[c] + h2o[c] <==> beta-d-galactosyl-(1_>4)-beta-d-glucosyl-(1<_>1)-ceramide[c] + d-galactose[c]	alpha-d-galactosyl-(1_>4)-beta-d-galactosyl-(1_>4)-beta-d-glucosyl-(1<_>1)-ceramide[c] + h2o[c] <=> beta-d-galactosyl-(1_>4)-beta-d-glucosyl-(1<_>1)-ceramide[c] + d-galactose[c]	-1000	1000	0	R03618	Galactose metabolism_Trihexosylceramide galactohydrolase	0
R03634 Galactose metabolism_	h2o[c] + stachyose[c] <==> d-galactose[c] + raffinose[c]	h2o[c] + stachyose[c] <=> d-galactose[c] + raffinose[c]	-1000	1000	0	R03634	Galactose metabolism_	0
R04019 Galactose metabolism_Digalactosylceramide galactohydrolase	digalactosylceramide[c] + h2o[c] <==> d-galactose[c] + galactosylceramide[c]	digalactosylceramide[c] + h2o[c] <=> d-galactose[c] + galactosylceramide[c]	-1000	1000	0	R04019	Galactose metabolism_Digalactosylceramide galactohydrolase	1
(2) R03618 Galactose metabolism_Trihexosylceramide galactohydrolase	alpha-d-galactosyl-(1_>4)-beta-d-galactosyl-(1_>4)-beta-d-glucosyl-(1<_>1)-ceramide[c] + h2o[c] <==> beta-d-galactosyl-(1_>4)-beta-d-glucosyl-(1<_>1)-ceramide[c] + d-galactose[c]	alpha-d-galactosyl-(1_>4)-beta-d-galactosyl-(1_>4)-beta-d-glucosyl-(1<_>1)-ceramide[c] + h2o[c] <=> beta-d-galactosyl-(1_>4)-beta-d-glucosyl-(1<_>1)-ceramide[c] + d-galactose[c]	-1000	1000	0	R03618	Galactose metabolism_Trihexosylceramide galactohydrolase	0
R00801 Galactose metabolism_sucrose glucohydrolase	h2o[c] + sucrose[c] <==> d-fructose[c] + d-glucose[c]	h2o[c] + sucrose[c] <=> d-fructose[c] + d-glucose[c]	-1000	1000	0	R00801	Galactose metabolism_sucrose glucohydrolase	0
R00802 Galactose metabolism_sucrose alpha-glucohydrolase	h2o[c] + sucrose[c] <==> alpha-d-glucose[c] + beta-d-fructose[c]	h2o[c] + sucrose[c] <=> alpha-d-glucose[c] + beta-d-fructose[c]	-1000	1000	0	R00802	Galactose metabolism_sucrose alpha-glucohydrolase	0
R06087 Galactose metabolism_	h2o[c] + neohancoside d[c] <==> d-fructose[c] + d-glucose[c]	h2o[c] + neohancoside d[c] <=> d-fructose[c] + d-glucose[c]	-1000	1000	0	R06087	Galactose metabolism_	0
R06088 Galactose metabolism_	h2o[c] + neohancoside d[c] <==> alpha-d-glucose[c] + beta-d-fructose[c]	h2o[c] + neohancoside d[c] <=> alpha-d-glucose[c] + beta-d-fructose[c]	-1000	1000	0	R06088	Galactose metabolism_	0
R04779 Galactose metabolism_atp:D-fructose-6-phosphate 1-phosphotransferase	atp[c] + beta-d-fructose 6-phosphate[c] <==> atp[c] + beta-d-fructose 1,6-bisphosphate[c]	atp[c] + beta-d-fructose 6-phosphate[c] <=> atp[c] + beta-d-fructose 1,6-bisphosphate[c]	-1000	1000	0	R04779	Galactose metabolism_atp:D-fructose-6-phosphate 1-phosphotransferase	0
(1) R04470 Galactose metabolism_Digalactosyl-diacylglycerol galactohydrolase	digalactosyl-diacylglycerol[c] + h2o[c] <==> 1,2-diacyl-3-beta-d-galactosyl-sn-glycerol[c] + d-galactose[c]	digalactosyl-diacylglycerol[c] + h2o[c] <=> 1,2-diacyl-3-beta-d-galactosyl-sn-glycerol[c] + d-galactose[c]	-1000	1000	0	R04470	Galactose metabolism_Digalactosyl-diacylglycerol galactohydrolase	0
(2) R04470 Galactose metabolism_Digalactosyl-diacylglycerol galactohydrolase	digalactosyl-diacylglycerol[c] + h2o[c] <==> 1,2-diacyl-3-beta-d-galactosyl-sn-glycerol[c] + d-galactose[c]	digalactosyl-diacylglycerol[c] + h2o[c] <=> 1,2-diacyl-3-beta-d-galactosyl-sn-glycerol[c] + d-galactose[c]	-1000	1000	0	R04470	Galactose metabolism_Digalactosyl-diacylglycerol galactohydrolase	0
R05549 Galactose metabolism_	d-gal alpha 1_>6d-gal alpha 1_>6d-glucose[c] + h2o[c] <==> d-galactose[c] + melibiose[c]	d-gal alpha 1_>6d-gal alpha 1_>6d-glucose[c] + h2o[c] <=> d-galactose[c] + melibiose[c]	-1000	1000	0	R05549	Galactose metabolism_	1
R05961 Galactose metabolism_	globotriaosylceramide[c] + h2o[c] <==> d-galactose[c] + lactosylceramide[c]	globotriaosylceramide[c] + h2o[c] <=> d-galactose[c] + lactosylceramide[c]	-1000	1000	0	R05961	Galactose metabolism_	1
R06070 Galactose metabolism_	h2o[c] + raffinose[c] <==> d-galactose[c] + neohancoside d[c]	h2o[c] + raffinose[c] <=> d-galactose[c] + neohancoside d[c]	-1000	1000	0	R06070	Galactose metabolism_	0
R06096 Galactose metabolism_	h2o[c] + manninotriose[c] <==> d-galactose[c] + melibiose[c]	h2o[c] + manninotriose[c] <=> d-galactose[c] + melibiose[c]	-1000	1000	0	R06096	Galactose metabolism_	1
R06093 Galactose metabolism_	galactinol[c] + h2o[c] <==> d-galactose[c] + myo-inositol[c]	galactinol[c] + h2o[c] <=> d-galactose[c] + myo-inositol[c]	-1000	1000	0	R06093	Galactose metabolism_	1
R06094 Galactose metabolism_	ga2-cer[c] + h2o[c] <==> d-galactose[c] + galactosylceramide[c]	ga2-cer[c] + h2o[c] <=> d-galactose[c] + galactosylceramide[c]	-1000	1000	0	R06094	Galactose metabolism_	1
R00299 Galactose metabolism_atp:D-glucose 6-phosphotransferase	atp[c] + d-glucose[c] <==> atp[c] + d-glucose 6-phosphate[c]	atp[c] + d-glucose[c] <=> atp[c] + d-glucose 6-phosphate[c]	-1000	1000	0	R00299	Galactose metabolism_atp:D-glucose 6-phosphotransferase	0
R00028 Galactose metabolism_maltose glucohydrolase	h2o[c] + maltose[c] <==> (2) alpha-d-glucose[c]	h2o[c] + maltose[c] <=> (2) alpha-d-glucose[c]	-1000	1000	0	R00028	Galactose metabolism_maltose glucohydrolase	1
R01778 Fatty acid elongation_(3S)-3-hydroxyacyl-CoA:NAD+ oxidoreductase	(3s)-3-hydroxyacyl-coa[c] + nad+[c] <==> 3-oxoacyl-coa[c] + h+[c] + nadh[c]	(3s)-3-hydroxyacyl-coa[c] + nad+[c] <=> 3-oxoacyl-coa[c] + h+[c] + nadh[c]	-1000	1000	0	R01778	Fatty acid elongation_(3S)-3-hydroxyacyl-CoA:NAD+ oxidoreductase	0
R08602 Fatty acid elongation_S-palmitoylprotein hydrolase	h2o[c] + s-palmitoylprotein[c] <==> hexadecanoic acid[c] + protein l-cysteine[c]	h2o[c] + s-palmitoylprotein[c] <=> hexadecanoic acid[c] + protein l-cysteine[c]	-1000	1000	0	R08602	Fatty acid elongation_S-palmitoylprotein hydrolase	1
R01274 Fatty acid elongation_palmitoyl-CoA hydrolase	h2o[c] + palmitoyl-coa[c] <==> coa[c] + hexadecanoic acid[c]	h2o[c] + palmitoyl-coa[c] <=> coa[c] + hexadecanoic acid[c]	-1000	1000	0	R01274	Fatty acid elongation_palmitoyl-CoA hydrolase	0
R02685 Fatty acid elongation₍3S)-3-hydroxyacyl-CoA hydro-lyase	(3s)-3-hydroxyacyl-coa[c] <==> h2o[c] + trans-2,3-dehydroacyl-coa[c]	(3s)-3-hydroxyacyl-coa[c] <=> h2o[c] + trans-2,3-dehydroacyl-coa[c]	-1000	1000	0	R02685	Fatty acid elongation₍3S)-3-hydroxyacyl-CoA hydro-lyase	0
R03026 Fatty acid elongation₍3S)₍S)-3-hydroxybutanoyl-CoA hydro-lyase	(s)-3-hydroxybutanoyl-coa[c] <==> crotonoyl-coa[c] + h2o[c]	(s)-3-hydroxybutanoyl-coa[c] <=> crotonoyl-coa[c] + h2o[c]	-1000	1000	0	R03026	Fatty acid elongation₍3S)₍S)-3-hydroxybutanoyl-CoA hydro-lyase	0
R03045 Fatty acid elongation₍3S)_3-Hydroxypropionyl-CoA hydro-lyase	3-hydroxypropionyl-coa[c] <==> h2o[c] + propenoyl-coa[c]	3-hydroxypropionyl-coa[c] <=> h2o[c] + propenoyl-coa[c]	-1000	1000	0	R03045	Fatty acid elongation₍3S)_3-Hydroxypropionyl-CoA hydro-lyase	1
R04170 Fatty acid elongation₍3S)₍S)-3-Hydroxydodecanoyl-CoA hydro-lyase	(s)-3-hydroxydodecanoyl-coa[c] <==> 2-trans-dodecenoyl-coa[c] + h2o[c]	(s)-3-hydroxydodecanoyl-coa[c] <=> 2-trans-dodecenoyl-coa[c] + h2o[c]	-1000	1000	0	R04170	Fatty acid elongation₍3S)₍S)-3-Hydroxydodecanoyl-CoA hydro-lyase	0
R04204 Fatty acid elongation₍3S)₍2S,3S)-3-Hydroxy-2-methylbutanoyl-CoA hydro-liase	(2s,3s)-3-hydroxy-2-methylbutanoyl-coa[c] <==> 2-methylbut-2-enoyl-coa[c] + h2o[c]	(2s,3s)-3-hydroxy-2-methylbutanoyl-coa[c] <=> 2-methylbut-2-enoyl-coa[c] + h2o[c]	-1000	1000	0	R04204	Fatty acid elongation₍3S)₍2S,3S)-3-Hydroxy-2-methylbutanoyl-CoA hydro-liase	1
R04224 Fatty acid elongation₍3S)_(S)-3-Hydroxyisobutyryl-CoA hydro-lyase	2-methylprop-2-enoyl-coa[c] + h2o[c] <==> (s)-3-hydroxyisobutyryl-coa[c]	2-methylprop-2-enoyl-coa[c] + h2o[c] <=> (s)-3-hydroxyisobutyryl-coa[c]	-1000	1000	0	R04224	Fatty acid elongation₍3S)_(S)-3-Hydroxyisobutyryl-CoA hydro-lyase	1
R04740 Fatty acid elongation₍3S)_(S)-3-Hydroxytetradecanoyl-CoA hydro-lyase	(s)-3-hydroxytetradecanoyl-coa[c] <==> h2o[c] + trans-tetradec-2-enoyl-coa[c]	(s)-3-hydroxytetradecanoyl-coa[c] <=> h2o[c] + trans-tetradec-2-enoyl-coa[c]	-1000	1000	0	R04740	Fatty acid elongation₍3S)_(S)-3-Hydroxytetradecanoyl-CoA hydro-lyase	0
R04744 Fatty acid elongation₍3S)_(S)-Hydroxydecanoyl-CoA hydro-lyase	(s)-hydroxydecanoyl-coa[c] <==> h2o[c] + trans-dec-2-enoyl-coa[c]	(s)-hydroxydecanoyl-coa[c] <=> h2o[c] + trans-dec-2-enoyl-coa[c]	-1000	1000	0	R04744	Fatty acid elongation₍3S)_(S)-Hydroxydecanoyl-CoA hydro-lyase	0
R04746 Fatty acid elongation₍3S)_(S)-Hydroxyoctanoyl-CoA hydro-lyase	(s)-3-hydroxyoctanoyl-coa[c] <==> h2o[c] + trans-oct-2-enoyl-coa[c]	(s)-3-hydroxyoctanoyl-coa[c] <=> h2o[c] + trans-oct-2-enoyl-coa[c]	-1000	1000	0	R04746	Fatty acid elongation₍3S)_(S)-Hydroxyoctanoyl-CoA hydro-lyase	0
R04749 Fatty acid elongation₍3S)_(S)-Hydroxyhexanoyl-CoA hydro-lyase	(s)-hydroxyhexanoyl-coa[c] <==> h2o[c] + trans-hex-2-enoyl-coa[c]	(s)-hydroxyhexanoyl-coa[c] <=> h2o[c] + trans-hex-2-enoyl-coa[c]	-1000	1000	0	R04749	Fatty acid elongation₍3S)_(S)-Hydroxyhexanoyl-CoA hydro-lyase	0
R07889 Fatty acid elongation₍3S)_	3-hydroxy-opc8-coa[c] <==> h2o[c] + trans-2-enoyl-opc8-coa[c]	3-hydroxy-opc8-coa[c] <=> h2o[c] + trans-2-enoyl-opc8-coa[c]	-1000	1000	0	R07889	Fatty acid elongation₍3S)_	0
R07893 Fatty acid elongation₍3S)_	3-hydroxy-opc6-coa[c] <==> h2o[c] + trans-2-enoyl-opc6-coa[c]	3-hydroxy-opc6-coa[c] <=> h2o[c] + trans-2-enoyl-opc6-coa[c]	-1000	1000	0	R07893	Fatty acid elongation₍3S)_	0
R07897 Fatty acid elongation₍3S)_	3-hydroxy-opc4-coa[c] <==> h2o[c] + trans-2-enoyl-opc4-coa[c]	3-hydroxy-opc4-coa[c] <=> h2o[c] + trans-2-enoyl-opc4-coa[c]	-1000	1000	0	R07897	Fatty acid elongation₍3S)_	0
R07314 Fatty acid elongation₍3S)_(3S)-3-hydroxyacyl-CoA hydro-lyase	(3s)-3-hydroxyacyl-coa[c] <==> h2o[c] + trans-3-enoyl-coa[c]	(3s)-3-hydroxyacyl-coa[c] <=> h2o[c] + trans-3-enoyl-coa[c]	-1000	1000	0	R07314	Fatty acid elongation₍3S)_(3S)-3-hydroxyacyl-CoA hydro-lyase	1
R03224 Fatty acid elongation₍3S)_(3R)-3-Hydroxyacyl-CoA hydro-lyase	(3r)-3-hydroxyacyl-coa[c] <==> cis-2,3-dehydroacyl-coa[c] + h2o[c]	(3r)-3-hydroxyacyl-coa[c] <=> cis-2,3-dehydroacyl-coa[c] + h2o[c]	-1000	1000	0	R03224	Fatty acid elongation₍3S)_(3R)-3-Hydroxyacyl-CoA hydro-lyase	1
R04137 Fatty acid elongation₍3S)_3-hydroxyisovaleryl-CoA hydro-lyase	3-hydroxyisovaleryl-coa[c] <==> 3-methylcrotonyl-coa[c] + h2o[c]	3-hydroxyisovaleryl-coa[c] <=> 3-methylcrotonyl-coa[c] + h2o[c]	-1000	1000	0	R04137	Fatty acid elongation₍3S)_3-hydroxyisovaleryl-CoA hydro-lyase	1
R05595 Fatty acid elongation₍3S)_	crotonoyl-coa[c] + h2o[c] <==> 3-hydroxybutanoyl-coa[c]	crotonoyl-coa[c] + h2o[c] <=> 3-hydroxybutanoyl-coa[c]	-1000	1000	0	R05595	Fatty acid elongation₍3S)_	1
R06411 Fatty acid elongation₍3S)_3-hydroxy-2,6-dimethyl-5-methylene-heptanoyl-CoA hydro-lyase	cis-2-methyl-5-isopropylhexa-2,5-dienoyl-coa[c] + h2o[c] <==> 3-hydroxy-2,6-dimethyl-5-methylene-heptanoyl-coa[c]	cis-2-methyl-5-isopropylhexa-2,5-dienoyl-coa[c] + h2o[c] <=> 3-hydroxy-2,6-dimethyl-5-methylene-heptanoyl-coa[c]	-1000	1000	0	R06411	Fatty acid elongation₍3S)_3-hydroxy-2,6-dimethyl-5-methylene-heptanoyl-CoA hydro-lyase	1
R06412 Fatty acid elongation₍3S)_trans-2-Methyl-5-isopropylhexa-2,5-dienoyl-CoA hydro-lyase	h2o[c] + trans-2-methyl-5-isopropylhexa-2,5-dienoyl-coa[c] <==> 3-hydroxy-2,6-dimethyl-5-methylene-heptanoyl-coa[c]	h2o[c] + trans-2-methyl-5-isopropylhexa-2,5-dienoyl-coa[c] <=> 3-hydroxy-2,6-dimethyl-5-methylene-heptanoyl-coa[c]	-1000	1000	0	R06412	Fatty acid elongation₍3S)_trans-2-Methyl-5-isopropylhexa-2,5-dienoyl-CoA hydro-lyase	1
R06942 Fatty acid elongation₍3S)₍3S)-3-hydroxyacyl-CoA hydro-lyase	5-carboxy-2-pentenoyl-coa[c] + h2o[c] <==> (3s)-3-hydroxyadipyl-coa[c]	5-carboxy-2-pentenoyl-coa[c] + h2o[c] <=> (3s)-3-hydroxyadipyl-coa[c]	-1000	1000	0	R06942	Fatty acid elongation₍3S)₍3S)-3-hydroxyacyl-CoA hydro-lyase	1
R08093 Fatty acid elongation₍3S)₃-hydroxy-5-methylhex-4-enoyl-CoA hydro-lyase	(2e)-5-methylhexa-2,4-dienoyl-coa[c] + h2o[c] <==> 3-hydroxy-5-methylhex-4-enoyl-coa[c]	(2e)-5-methylhexa-2,4-dienoyl-coa[c] + h2o[c] <=> 3-hydroxy-5-methylhex-4-enoyl-coa[c]	-1000	1000	0	R08093	Fatty acid elongation₍3S)₃-hydroxy-5-methylhex-4-enoyl-CoA hydro-lyase	1
R02352 Fatty acid elongation₍3S)_Estradiol-17beta:NAD+ 17-oxidoreductase	estradiol-17beta[c] + nad+[c] <==> estrone[c] + h+ equation[c] + nadh[c]	estradiol-17beta[c] + nad+[c] <=> estrone[c] + h+ equation[c] + nadh[c]	-1000	1000	0	R02352	Fatty acid elongation₍3S)_Estradiol-17beta:NAD+ 17-oxidoreductase	1
R02353 Fatty acid elongation₍3S)_Estradiol-17beta:Natp+ 17-oxidoreductase	estradiol-17beta[c] + natp+[c] <==> estrone[c] + h+[c] + natph[c]	estradiol-17beta[c] + natp+[c] <=> estrone[c] + h+[c] + natph[c]	-1000	1000	0	R02353	Fatty acid elongation₍3S)_Estradiol-17beta:Natp+ 17-oxidoreductase	0
R04681 Fatty acid elongation₍3S)_Estriol:NAD+ 17-oxidoreductase	estriol[c] + nad+[c] <==> 16alpha-hydroxyestrone[c] + h+[c] + nadh[c]	estriol[c] + nad+[c] <=> 16alpha-hydroxyestrone[c] + h+[c] + nadh[c]	-1000	1000	0	R04681	Fatty acid elongation₍3S)_Estriol:NAD+ 17-oxidoreductase	0
R04682 Fatty acid elongation₍3S)_Estriol:Natp+ 17-oxidoreductase	estriol[c] + natp+[c] <==> 16alpha-hydroxyestrone[c] + h+[c] + natph[c]	estriol[c] + natp+[c] <=> 16alpha-hydroxyestrone[c] + h+[c] + natph[c]	-1000	1000	0	R04682	Fatty acid elongation₍3S)_Estriol:Natp+ 17-oxidoreductase	0
R08945 Fatty acid elongation₍3S)_11beta,17beta-dihydroxy-4-androsten-3-one:NAD+ 17-oxidoreductase	11beta,17beta-dihydroxy-4-androsten-3-one[c] + nad+[c] <==> 11beta-hydroxyandrost-4-ene-3,17-dione[c] + h+[c] + nadh[c]	11beta,17beta-dihydroxy-4-androsten-3-one[c] + nad+[c] <=> 11beta-hydroxyandrost-4-ene-3,17-dione[c] + h+[c] + nadh[c]	-1000	1000	0	R08945	Fatty acid elongation₍3S)_11beta,17beta-dihydroxy-4-androsten-3-one:NAD+ 17-oxidoreductase	0
R08980 Fatty acid elongation₍3S)_11beta,17beta-dihydroxy-4-androsten-3-one:Natp+ 17-oxidoreductase	11beta,17beta-dihydroxy-4-androsten-3-one[c] + natp+[c] <==> 11beta-hydroxyandrost-4-ene-3,17-dione[c] + h+[c] + natph[c]	11beta,17beta-dihydroxy-4-androsten-3-one[c] + natp+[c] <=> 11beta-hydroxyandrost-4-ene-3,17-dione[c] + h+[c] + natph[c]	-1000	1000	0	R08980	Fatty acid elongation₍3S)_11beta,17beta-dihydroxy-4-androsten-3-one:Natp+ 17-oxidoreductase	0
R10826 Fatty acid elongation₍3S)_very-long-chain-(3R)-3-hydroxyacyl-CoA:Natp+ oxidoreductase	natp+[c] + very-long-chain (3r)-3-hydroxyacyl-coa[c] <==> h+[c]+ natph+[c]+ very-long-chain 3-oxoacyl-coa[c]	natp+[c] + very-long-chain (3r)-3-hydroxyacyl-coa[c] <=> h+[c]+ natph+[c]+ very-long-chain 3-oxoacyl-coa[c]	-1000	1000	0	R10826	Fatty acid elongation₍3S)_very-long-chain-(3R)-3-hydroxyacyl-CoA:Natp+ oxidoreductase	0
R07759 Fatty acid elongation₍3S)_	3-oxostearoyl-coa[c] + h+[c] + natph+[c]<==> 3-hydroxyoctadecanoyl-coa[c] + natp+[c]	3-oxostearoyl-coa[c] + h+[c] + natph+[c]<=> 3-hydroxyoctadecanoyl-coa[c] + natp+[c]	-1000	1000	0	R07759	Fatty acid elongation₍3S)_	1
R07760 Fatty acid elongation₍3S)_	3-hydroxyoctadecanoyl-coa[c] <==> (2e)-octadecenoyl-coa[c] + h2o[c]	3-hydroxyoctadecanoyl-coa[c] <=> (2e)-octadecenoyl-coa[c] + h2o[c]	-1000	1000	0	R07760	Fatty acid elongation₍3S)_	0
R01705 Fatty acid elongation_Palmitoyl-protein hydrolase	hexadecanoic acid[c] + protein[c] <==> h2o[c] + palmitoyl-protein[c]	hexadecanoic acid[c] + protein[c] <=> h2o[c] + palmitoyl-protein[c]	-1000	1000	0	R01705	Fatty acid elongation_Palmitoyl-protein hydrolase	1
R07761 Fatty acid elongation₍3S)_octadecanoyl-CoA:Natp+ trans-2-oxidoreductase	(2e)-octadecenoyl-coa[c] + h+[c] + natph+[c]<==> natp+[c] + stearoyl-coa[c]	(2e)-octadecenoyl-coa[c] + h+[c] + natph+[c]<=> natp+[c] + stearoyl-coa[c]	-1000	1000	0	R07761	Fatty acid elongation₍3S)_octadecanoyl-CoA:Natp+ trans-2-oxidoreductase	0
R09449 Fatty acid elongation₍3S)_very-long-chain acyl-CoA:Natp+ oxidoreductase	h+[c] + natph+[c]+ trans-2,3-dehydroacyl-coa[c] <==> long-chain acyl-coa[c] + natp+[c]	h+[c] + natph+[c]+ trans-2,3-dehydroacyl-coa[c] <=> long-chain acyl-coa[c] + natp+[c]	-1000	1000	0	R09449	Fatty acid elongation₍3S)_very-long-chain acyl-CoA:Natp+ oxidoreductase	1
R10827 Fatty acid elongation_very-long-chain (3R)-3-hydroxyacyl-CoA hydro-lyase	very-long-chain (3r)-3-hydroxyacyl-coa[c] <==> h2o[c] + very-long-chain trans-2,3-dehydroacyl-coa[c]	very-long-chain (3r)-3-hydroxyacyl-coa[c] <=> h2o[c] + very-long-chain trans-2,3-dehydroacyl-coa[c]	-1000	1000	0	R10827	Fatty acid elongation_very-long-chain (3R)-3-hydroxyacyl-CoA hydro-lyase	0
R10828 Fatty acid elongation_very-long-chain acyl-CoA:Natp+ oxidoreductase	natp+[c] + very-long-chain acyl-coa[c] <==> h+[c] + natph+[c]+ very-long-chain trans-2,3-dehydroacyl-coa[c]	natp+[c] + very-long-chain acyl-coa[c] <=> h+[c] + natph+[c]+ very-long-chain trans-2,3-dehydroacyl-coa[c]	-1000	1000	0	R10828	Fatty acid elongation_very-long-chain acyl-CoA:Natp+ oxidoreductase	1
R00238 Synthesis and degradation of ketone bodies_Acetyl-CoA:acetyl-CoA C-acetyltransferase	(2) acetyl-coa[c] <==> acetoacetyl-coa[c] + coa[c]	(2) acetyl-coa[c] <=> acetoacetyl-coa[c] + coa[c]	-1000	1000	0	R00238	Synthesis and degradation of ketone bodies_Acetyl-CoA:acetyl-CoA C-acetyltransferase	0
R00410 Synthesis and degradation of ketone bodies_succinyl-CoA:acetoacetate CoA-transferase	acetoacetate[c] + succinyl-coa[c] <==> acetoacetyl-coa[c] + succinate[c]	acetoacetate[c] + succinyl-coa[c] <=> acetoacetyl-coa[c] + succinate[c]	-1000	1000	0	R00410	Synthesis and degradation of ketone bodies_succinyl-CoA:acetoacetate CoA-transferase	0
R01780 Synthesis and degradation of ketone bodies_Succinyl-CoA:3-oxo-acid CoA-transferase	3-oxo acid[c] + succinyl-coa[c] <==> 3-oxoacyl-coa[c] + succinate[c]	3-oxo acid[c] + succinyl-coa[c] <=> 3-oxoacyl-coa[c] + succinate[c]	-1000	1000	0	R01780	Synthesis and degradation of ketone bodies_Succinyl-CoA:3-oxo-acid CoA-transferase	1
R01366 Synthesis and degradation of ketone bodies_Acetoacetate carboxy-lyase (acetone-forming)	acetoacetate[c] <==> acetone[c] + co2[c]	acetoacetate[c] <=> acetone[c] + co2[c]	-1000	1000	0	R01366	Synthesis and degradation of ketone bodies_Acetoacetate carboxy-lyase (acetone-forming)	1
R00702 Steroid biosynthesis_farnesyl-diphosphate:farnesyl-diphosphate farnesyltransferase	(2) trans,trans-farnesyl diphosphate[c] <==> diphosphate[c] + presqualene diphosphate[c]	(2) trans,trans-farnesyl diphosphate[c] <=> diphosphate[c] + presqualene diphosphate[c]	-1000	1000	0	R00702	Steroid biosynthesis_farnesyl-diphosphate:farnesyl-diphosphate farnesyltransferase	1
R05639 Steroid biosynthesis_ 4,4-dimethyl-5a-cholesta-8,24-dien-3b-ol:Natp+ D14-oxidoreductase	14-demethyllanosterol[c] + natp+[c] <==> 4,4-dimethyl-5alpha-cholesta-8,14,24-trien-3beta-ol[c] + h+[c] + natph[c]	14-demethyllanosterol[c] + natp+[c] <=> 4,4-dimethyl-5alpha-cholesta-8,14,24-trien-3beta-ol[c] + h+[c] + natph[c]	-1000	1000	0	R05639	Steroid biosynthesis_ 4,4-dimethyl-5a-cholesta-8,24-dien-3b-ol:Natp+ D14-oxidoreductase	1
R04501 Steroid biosynthesis_ 4,4-dimethyl-5alpha-cholest-7-en-3beta-ol,NADH:oxygen oxidoreductase (hydroxylating)	4,4-dimethyl-5alpha-cholest-7-en-3beta-ol[c] + h+[c] + nadh+[c]+ oxygen[c] <==> 4beta-hydroxymethyl-4alpha-methyl-5alpha-cholest-7-en-3beta-ol[c] + h2o[c] + nad+[c]	4,4-dimethyl-5alpha-cholest-7-en-3beta-ol[c] + h+[c] + nadh+[c]+ oxygen[c] <=> 4beta-hydroxymethyl-4alpha-methyl-5alpha-cholest-7-en-3beta-ol[c] + h2o[c] + nad+[c]	-1000	1000	0	R04501	Steroid biosynthesis_ 4,4-dimethyl-5alpha-cholest-7-en-3beta-ol,NADH:oxygen oxidoreductase (hydroxylating)	0
R05733 Steroid biosynthesis_4beta-hydroxymethyl-4alpha-methyl-5alpha-cholest-7-en-3beta-ol,NADH:oxygen oxidoreductase (hydroxylating)	4beta-hydroxymethyl-4alpha-methyl-5alpha-cholest-7-en-3beta-ol[c] + h+[c] + nadh+[c]+ oxygen[c] <==> 3beta-hydroxy-4beta-methyl-5alpha-cholest-7-ene-4alpha-carbaldehyde[c] + (2) h2o[c] + nad+[c]	4beta-hydroxymethyl-4alpha-methyl-5alpha-cholest-7-en-3beta-ol[c] + h+[c] + nadh+[c]+ oxygen[c] <=> 3beta-hydroxy-4beta-methyl-5alpha-cholest-7-ene-4alpha-carbaldehyde[c] + (2) h2o[c] + nad+[c]	-1000	1000	0	R05733	Steroid biosynthesis_4beta-hydroxymethyl-4alpha-methyl-5alpha-cholest-7-en-3beta-ol,NADH:oxygen oxidoreductase (hydroxylating)	0
R05734 Steroid biosynthesis_3beta-hydroxy-4beta-methyl-5alpha-cholest-7-ene-4alpha-carbaldehyde,NADH:oxygen oxidoreductase (hydroxylating)	3beta-hydroxy-4beta-methyl-5alpha-cholest-7-ene-4alpha-carbaldehyde[c] + h+[c] + nadh+[c]+ oxygen[c] <==> 3beta-hydroxy-4beta-methyl-5alpha-cholest-7-ene-4alpha-carboxylate[c] + h2o[c] + nad+[c]	3beta-hydroxy-4beta-methyl-5alpha-cholest-7-ene-4alpha-carbaldehyde[c] + h+[c] + nadh+[c]+ oxygen[c] <=> 3beta-hydroxy-4beta-methyl-5alpha-cholest-7-ene-4alpha-carboxylate[c] + h2o[c] + nad+[c]	-1000	1000	0	R05734	Steroid biosynthesis_3beta-hydroxy-4beta-methyl-5alpha-cholest-7-ene-4alpha-carbaldehyde,NADH:oxygen oxidoreductase (hydroxylating)	0
R05736 Steroid biosynthesis_4,4-dimethyl-5a-cholest-7-en-3b-ol,hydrogen-donor:oxygen oxidoreductase (hydroxylating)	4,4-dimethyl-5alpha-cholest-7-en-3beta-ol[c] + h+[c] + natph+[c]+ oxygen[c] <==> 4beta-hydroxymethyl-4alpha-methyl-5alpha-cholest-7-en-3beta-ol[c] + h2o[c] + natp+[c]	4,4-dimethyl-5alpha-cholest-7-en-3beta-ol[c] + h+[c] + natph+[c]+ oxygen[c] <=> 4beta-hydroxymethyl-4alpha-methyl-5alpha-cholest-7-en-3beta-ol[c] + h2o[c] + natp+[c]	-1000	1000	0	R05736	Steroid biosynthesis_4,4-dimethyl-5a-cholest-7-en-3b-ol,hydrogen-donor:oxygen oxidoreductase (hydroxylating)	0
R05737 Steroid biosynthesis_4,4-dimethyl-5a-cholest-7-en-3b-ol,hydrogen-donor:oxygen oxidoreductase (hydroxylating)	4beta-hydroxymethyl-4alpha-methyl-5alpha-cholest-7-en-3beta-ol[c] + h+[c] + natph+[c]+ oxygen[c] <==> 3beta-hydroxy-4beta-methyl-5alpha-cholest-7-ene-4alpha-carbaldehyde[c] + (2) h2o[c] + natp+[c]	4beta-hydroxymethyl-4alpha-methyl-5alpha-cholest-7-en-3beta-ol[c] + h+[c] + natph+[c]+ oxygen[c] <=> 3beta-hydroxy-4beta-methyl-5alpha-cholest-7-ene-4alpha-carbaldehyde[c] + (2) h2o[c] + natp+[c]	-1000	1000	0	R05737	Steroid biosynthesis_4,4-dimethyl-5a-cholest-7-en-3b-ol,hydrogen-donor:oxygen oxidoreductase (hydroxylating)	0
R05738 Steroid biosynthesis_4,4-dimethyl-5a-cholest-7-en-3b-ol,hydrogen-donor:oxygen oxidoreductase (hydroxylating)	3beta-hydroxy-4beta-methyl-5alpha-cholest-7-ene-4alpha-carbaldehyde[c] + h+[c] + natph+[c]+ oxygen[c] <==> 3beta-hydroxy-4beta-methyl-5alpha-cholest-7-ene-4alpha-carboxylate[c] + h2o[c] + natp+[c]	3beta-hydroxy-4beta-methyl-5alpha-cholest-7-ene-4alpha-carbaldehyde[c] + h+[c] + natph+[c]+ oxygen[c] <=> 3beta-hydroxy-4beta-methyl-5alpha-cholest-7-ene-4alpha-carboxylate[c] + h2o[c] + natp+[c]	-1000	1000	0	R05738	Steroid biosynthesis_4,4-dimethyl-5a-cholest-7-en-3b-ol,hydrogen-donor:oxygen oxidoreductase (hydroxylating)	0
R10057 Steroid biosynthesis_4,4-dimethyl-5alpha-cholest-7-en-3beta-ol,NADH:oxygen oxidoreductase (hydroxylating)	4,4-dimethyl-5alpha-cholest-7-en-3beta-ol[c] + (3) h+[c] + (3) nadh+[c]+ (3) oxygen[c] <==> 3beta-hydroxy-4beta-methyl-5alpha-cholest-7-ene-4alpha-carboxylate[c] + (4) h2o[c] + (3) nad+[c]	4,4-dimethyl-5alpha-cholest-7-en-3beta-ol[c] + (3) h+[c] + (3) nadh+[c]+ (3) oxygen[c] <=> 3beta-hydroxy-4beta-methyl-5alpha-cholest-7-ene-4alpha-carboxylate[c] + (4) h2o[c] + (3) nad+[c]	-1000	1000	0	R10057	Steroid biosynthesis_4,4-dimethyl-5alpha-cholest-7-en-3beta-ol,NADH:oxygen oxidoreductase (hydroxylating)	0
R10058 Steroid biosynthesis_4,4-dimethyl-5alpha-cholest-7-en-3beta-ol,NatpH:oxygen oxidoreductase (hydroxylating)	4,4-dimethyl-5alpha-cholest-7-en-3beta-ol[c] + (3) h+[c] + (3) natph+[c]+ (3) oxygen[c] <==> 3beta-hydroxy-4beta-methyl-5alpha-cholest-7-ene-4alpha-carboxylate[c] + (4) h2o[c] + (3) natp+[c]	4,4-dimethyl-5alpha-cholest-7-en-3beta-ol[c] + (3) h+[c] + (3) natph+[c]+ (3) oxygen[c] <=> 3beta-hydroxy-4beta-methyl-5alpha-cholest-7-ene-4alpha-carboxylate[c] + (4) h2o[c] + (3) natp+[c]	-1000	1000	0	R10058	Steroid biosynthesis_4,4-dimethyl-5alpha-cholest-7-en-3beta-ol,NatpH:oxygen oxidoreductase (hydroxylating)	0
R04328 Steroid biosynthesis_	co2[c] + (4) h2o[c] + lathosterol[c] + (3) natp+[c] <==> (3) h+[c] + methostenol[c] + (3) natph+[c]+ (3) oxygen[c]	co2[c] + (4) h2o[c] + lathosterol[c] + (3) natp+[c] <=> (3) h+[c] + methostenol[c] + (3) natph+[c]+ (3) oxygen[c]	-1000	1000	0	R04328	Steroid biosynthesis_	0
R07215 Steroid biosynthesis_	lathosterol[c] + 2 Ferrocytochrome b5[c] + Oxygen[c] + 2 h+[c] <=> 7-Dehydrocholesterol[c] + 2 Ferricytochrome b5[c] + 2 h2o[c]	lathosterol[c] + 2 Ferrocytochrome b5[c] + Oxygen[c] + 2 h+[c] <=> 7-Dehydrocholesterol[c] + 2 Ferricytochrome b5[c] + 2 h2o[c]	-1000	1000	0	R07215	Steroid biosynthesis_	1
R07486 Steroid biosynthesis_	delta7-Avenasterol[c] + 2 Ferrocytochrome b5[c] + Oxygen[c] + 2 h+[c] <=> 5-Dehydroavenasterol[c] + 2 Ferricytochrome b5[c] + 2 h2o[c]	delta7-Avenasterol[c] + 2 Ferrocytochrome b5[c] + Oxygen[c] + 2 h+[c] <=> 5-Dehydroavenasterol[c] + 2 Ferricytochrome b5[c] + 2 h2o[c]	-1000	1000	0			1
R07491 Steroid biosynthesis_	Episterol[c] + 2 Ferrocytochrome b5[c] + Oxygen[c] + 2 h+[c] <=> 5-Dehydroepisterol[c] + 2 Ferricytochrome b5[c] + 2 H2O[c]	Episterol[c] + 2 Ferrocytochrome b5[c] + Oxygen[c] + 2 h+[c] <=> 5-Dehydroepisterol[c] + 2 Ferricytochrome b5[c] + 2 H2O[c]	-1000	1000	0			1
R07505 Steroid biosynthesis_	Episterol[c] + 2 Ferrocytochrome b5[c] + Oxygen[c] + 2 h+[c] <=> 5,7,24(28)-Ergostatrienol[c] + 2 Ferricytochrome b5[c] + 2 H2O[c]	Episterol[c] + 2 Ferrocytochrome b5[c] + Oxygen[c] + 2 h+[c] <=> 5,7,24(28)-Ergostatrienol[c] + 2 Ferricytochrome b5[c] + 2 H2O[c]	-1000	1000	0			1
R07482 Steroid biosynthesis_	24-methylenecycloartanol[c] <==> cycloeucalenol[c]	24-methylenecycloartanol[c] <=> cycloeucalenol[c]	-1000	1000	0	R07482	Steroid biosynthesis_	1
R07485 Steroid biosynthesis_	24-ethylidenelophenol[c] <==> delta7-avenasterol[c]	24-ethylidenelophenol[c] <=> delta7-avenasterol[c]	-1000	1000	0	R07485	Steroid biosynthesis_	1
R07490 Steroid biosynthesis_	24-methylenelophenol[c] <==> episterol[c]	24-methylenelophenol[c] <=> episterol[c]	-1000	1000	0	R07490	Steroid biosynthesis_	1
R07509 Steroid biosynthesis_	14-demethyllanosterol[c] + (3) h+[c] + (3) natph+[c]+ (3) oxygen[c] <==> 4alpha-methylzymosterol-4-carboxylate[c] + (4) h2o[c] + (3) natp+[c]	14-demethyllanosterol[c] + (3) h+[c] + (3) natph+[c]+ (3) oxygen[c] <=> 4alpha-methylzymosterol-4-carboxylate[c] + (4) h2o[c] + (3) natp+[c]	-1000	1000	0	R07509	Steroid biosynthesis_	1
R03353 Steroid biosynthesis_5alpha-Cholest-7-en-3beta-ol delta7-delta8-isomerase	lathosterol[c] <==> 5alpha-cholest-8-en-3beta-ol[c]	lathosterol[c] <=> 5alpha-cholest-8-en-3beta-ol[c]	-1000	1000	0	R03353	Steroid biosynthesis_5alpha-Cholest-7-en-3beta-ol delta7-delta8-isomerase	1
R04671 Steroid biosynthesis_4alpha-Methylcholesta-8-en-3beta-ol delta7-delta8-isomerase	4alpha-methylcholesta-8-en-3beta-ol[c] <==> methostenol[c]	4alpha-methylcholesta-8-en-3beta-ol[c] <=> methostenol[c]	-1000	1000	0	R04671	Steroid biosynthesis_4alpha-Methylcholesta-8-en-3beta-ol delta7-delta8-isomerase	1
R04804 Steroid biosynthesis_delta8,24-Cholestadien-3beta-ol delta7-delta8-isomerase	zymosterol[c] <==> 5alpha-cholesta-7,24-dien-3beta-ol[c]	zymosterol[c] <=> 5alpha-cholesta-7,24-dien-3beta-ol[c]	-1000	1000	0	R04804	Steroid biosynthesis_delta8,24-Cholestadien-3beta-ol delta7-delta8-isomerase	1
R07484 Steroid biosynthesis_	4alpha-methylfecosterol[c] <==> 24-methylenelophenol[c]	4alpha-methylfecosterol[c] <=> 24-methylenelophenol[c]	-1000	1000	0	R07484	Steroid biosynthesis_	1
R01462 Steroid biosynthesis_cholesterol ester acylhydrolase	cholesterol ester[c] + h2o[c] <==> cholesterol[c] + fatty acid[c]	cholesterol ester[c] + h2o[c] <=> cholesterol[c] + fatty acid[c]	-1000	1000	0	R01462	Steroid biosynthesis_cholesterol ester acylhydrolase	0
R03310 Steroid biosynthesis_5alpha-cholest-7-en-3beta-ol, NADH:oxygen 5-oxidoreductase	h+[c] + lathosterol[c] + nadh+[c]+ oxygen[c] <==> 7-dehydrocholesterol[c] + (2) h2o[c] + nad+[c]	h+[c] + lathosterol[c] + nadh+[c]+ oxygen[c] <=> 7-dehydrocholesterol[c] + (2) h2o[c] + nad+[c]	-1000	1000	0	R03310	Steroid biosynthesis_5alpha-cholest-7-en-3beta-ol, NADH:oxygen 5-oxidoreductase	1
R01369 Steroid biosynthesis_triacylglycerol acylhydrolase	h2o[c] + triacylglycerol[c] <==> carboxylate[c] + diacylglycerol[c]	h2o[c] + triacylglycerol[c] <=> carboxylate[c] + diacylglycerol[c]	-1000	1000	0	R01369	Steroid biosynthesis_triacylglycerol acylhydrolase	1
R01461 Steroid biosynthesis_Acyl-CoA:cholesterol O-acyltransferase	acyl-coa[c] + cholesterol[c] <==> cholesterol ester[c] + coa[c]	acyl-coa[c] + cholesterol[c] <=> cholesterol ester[c] + coa[c]	-1000	1000	0	R01461	Steroid biosynthesis_Acyl-CoA:cholesterol O-acyltransferase	0
R01372 Ubiquinone and other terpenoid-quinone biosynthesis_4-Hydroxyphenylpyruvate:oxygen oxidoreductase (hydroxylating,decarboxylating)	oxygen[c] + phenylpyruvate[c] <==> 2-hydroxyphenylacetate[c] + co2[c]	oxygen[c] + phenylpyruvate[c] <=> 2-hydroxyphenylacetate[c] + co2[c]	-1000	1000	0	R01372	Ubiquinone and other terpenoid-quinone biosynthesis_4-Hydroxyphenylpyruvate:oxygen oxidoreductase (hydroxylating,decarboxylating)	1
R00734 Ubiquinone and other terpenoid-quinone biosynthesis_L-tyrosine:2-oxoglutarate aminotransferase	2-oxoglutarate[c] + l-tyrosine[c] <==> 3-(4-hydroxyphenyl)pyruvate[c] + l-glutamate[c]	2-oxoglutarate[c] + l-tyrosine[c] <=> 3-(4-hydroxyphenyl)pyruvate[c] + l-glutamate[c]	-1000	1000	0	R00734	Ubiquinone and other terpenoid-quinone biosynthesis_L-tyrosine:2-oxoglutarate aminotransferase	1
R00694 Ubiquinone and other terpenoid-quinone biosynthesis_L-Phenylalanine:2-oxoglutarate aminotransferase	2-oxoglutarate[c] + l-phenylalanine[c] <==> l-glutamate[c] + phenylpyruvate[c]	2-oxoglutarate[c] + l-phenylalanine[c] <=> l-glutamate[c] + phenylpyruvate[c]	-1000	1000	0	R00694	Ubiquinone and other terpenoid-quinone biosynthesis_L-Phenylalanine:2-oxoglutarate aminotransferase	0
R07396 Ubiquinone and other terpenoid-quinone biosynthesis_	4-methylthio-2-oxobutanoic acid[c] + l-glutamate[c] <==> 2-oxoglutarate[c] + l-methionine[c]	4-methylthio-2-oxobutanoic acid[c] + l-glutamate[c] <=> 2-oxoglutarate[c] + l-methionine[c]	-1000	1000	0	R07396	Ubiquinone and other terpenoid-quinone biosynthesis_	1
R00253 Arginine biosynthesis_L-Glutamate:ammonia ligase (atp-forming)	ammonia[c] + atp[c] + l-glutamate[c] <==> atp[c] + l-glutamine[c] + orthophosphate[c]	ammonia[c] + atp[c] + l-glutamate[c] <=> atp[c] + l-glutamine[c] + orthophosphate[c]	-1000	1000	0	R00253	Arginine biosynthesis_L-Glutamate:ammonia ligase (atp-forming)	0
R00243 Arginine biosynthesis_L-glutamate:NAD+ oxidoreductase (deaminating)	h2o[c] + l-glutamate[c] + nad+[c] <==> 2-oxoglutarate[c] + ammonia[c] + h+[c] + nadh[c]	h2o[c] + l-glutamate[c] + nad+[c] <=> 2-oxoglutarate[c] + ammonia[c] + h+[c] + nadh[c]	-1000	1000	0	R00243	Arginine biosynthesis_L-glutamate:NAD+ oxidoreductase (deaminating)	0
R00248 Arginine biosynthesis_L-Glutamate:Natp+ oxidoreductase (deaminating)	h2o[c] + l-glutamate[c] + natp+[c] <==> 2-oxoglutarate[c] + ammonia[c] + h+[c] + natph[c]	h2o[c] + l-glutamate[c] + natp+[c] <=> 2-oxoglutarate[c] + ammonia[c] + h+[c] + natph[c]	-1000	1000	0	R00248	Arginine biosynthesis_L-Glutamate:Natp+ oxidoreductase (deaminating)	0
R00145 Arginine biosynthesis_alpha-amino acid:NAD+ oxidoreductase (deaminating)	alpha-amino acid[c] + h2o[c] + nad+[c] <==> 2-oxo acid[c] + ammonia[c] + h+[c] + nadh[c]	alpha-amino acid[c] + h2o[c] + nad+[c] <=> 2-oxo acid[c] + ammonia[c] + h+[c] + nadh[c]	-1000	1000	0	R00145	Arginine biosynthesis_alpha-amino acid:NAD+ oxidoreductase (deaminating)	0
R00146 Arginine biosynthesis_alpha-amino acid:Natp+ oxidoreductase (deaminating)	alpha-amino acid[c] + h2o[c] + natp+[c] <==> 2-oxo acid[c] + ammonia[c] + h+[c] + natph[c]	alpha-amino acid[c] + h2o[c] + natp+[c] <=> 2-oxo acid[c] + ammonia[c] + h+[c] + natph[c]	-1000	1000	0	R00146	Arginine biosynthesis_alpha-amino acid:Natp+ oxidoreductase (deaminating)	0
R00895 Arginine biosynthesis_L-Cysteine:2-oxoglutarate aminotransferase	2-oxoglutarate[c] + l-cysteine[c] <==> l-glutamate[c] + mercaptopyruvate[c]	2-oxoglutarate[c] + l-cysteine[c] <=> l-glutamate[c] + mercaptopyruvate[c]	-1000	1000	0	R00895	Arginine biosynthesis_L-Cysteine:2-oxoglutarate aminotransferase	0
R00896 Arginine biosynthesis_L-cysteine:2-oxoglutarate aminotransferase	2-oxoglutarate[c] + l-cysteine[c] <==> glutamate[c] + mercaptopyruvate[c]	2-oxoglutarate[c] + l-cysteine[c] <=> glutamate[c] + mercaptopyruvate[c]	-1000	1000	0	R00896	Arginine biosynthesis_L-cysteine:2-oxoglutarate aminotransferase	1
R02433 Arginine biosynthesis_L-cysteate:2-oxoglutarate aminotransferase	2-oxoglutarate[c] + l-cysteate[c] <==> 3-sulfopyruvate[c] + l-glutamate[c]	2-oxoglutarate[c] + l-cysteate[c] <=> 3-sulfopyruvate[c] + l-glutamate[c]	-1000	1000	0	R02433	Arginine biosynthesis_L-cysteate:2-oxoglutarate aminotransferase	1
R02619 Arginine biosynthesis₃-sulfino-L-alanine:2-oxoglutarate aminotransferase	2-oxoglutarate[c] + 3-sulfino-l-alanine[c] <==> 3-sulfinylpyruvate[c] + l-glutamate[c]	2-oxoglutarate[c] + 3-sulfino-l-alanine[c] <=> 3-sulfinylpyruvate[c] + l-glutamate[c]	-1000	1000	0	R02619	Arginine biosynthesis₃-sulfino-L-alanine:2-oxoglutarate aminotransferase	1
R05052 Arginine biosynthesis_L-erythro-4-hydroxyglutamate:2-oxoglutarate aminotransferase	2-oxoglutarate[c] + l-erythro-4-hydroxyglutamate[c] <==> (4r)-4-hydroxy-2-oxoglutarate[c] + l-glutamate[c]	2-oxoglutarate[c] + l-erythro-4-hydroxyglutamate[c] <=> (4r)-4-hydroxy-2-oxoglutarate[c] + l-glutamate[c]	-1000	1000	0	R05052	Arginine biosynthesis_L-erythro-4-hydroxyglutamate:2-oxoglutarate aminotransferase	1
R00355 Arginine biosynthesis_L-Aspartate:2-oxoglutarate aminotransferase	2-oxoglutarate[c] + l-aspartate[c] <==> l-glutamate[c] + oxaloacetate[c]	2-oxoglutarate[c] + l-aspartate[c] <=> l-glutamate[c] + oxaloacetate[c]	-1000	1000	0	R00355	Arginine biosynthesis_L-Aspartate:2-oxoglutarate aminotransferase	0
R00258 Arginine biosynthesis_L-Alanine:2-oxoglutarate aminotransferase	2-oxoglutarate[c] + l-alanine[c] <==> l-glutamate[c] + pyruvate[c]	2-oxoglutarate[c] + l-alanine[c] <=> l-glutamate[c] + pyruvate[c]	-1000	1000	0	R00258	Arginine biosynthesis_L-Alanine:2-oxoglutarate aminotransferase	0
R00256 L-glutamine amidohydrolase_L-glutamine amidohydrolase	h2o[c] + l-glutamine[c] <==> ammonia[c] + l-glutamate[c]	h2o[c] + l-glutamine[c] <=> ammonia[c] + l-glutamate[c]	-1000	1000	0	R00256	L-glutamine amidohydrolase_L-glutamine amidohydrolase	0
R00483 L-glutamine amidohydrolase_L-aspartate:ammonia ligase (AMP-forming)	ammonia[c] + atp[c] + l-aspartate[c] <==> amp[c] + diphosphate[c] + l-asparagine[c]	ammonia[c] + atp[c] + l-aspartate[c] <=> amp[c] + diphosphate[c] + l-asparagine[c]	-1000	1000	0	R00483	L-glutamine amidohydrolase_L-aspartate:ammonia ligase (AMP-forming)	0
R00578 L-glutamine amidohydrolase_L-aspartate:L-glutamine amido-ligase (AMP-forming)	atp[c] + h2o[c] + l-aspartate[c] + l-glutamine[c] <==> amp[c] + diphosphate[c] + l-asparagine[c] + l-glutamate[c]	atp[c] + h2o[c] + l-aspartate[c] + l-glutamine[c] <=> amp[c] + diphosphate[c] + l-asparagine[c] + l-glutamate[c]	-1000	1000	0	R00578	L-glutamine amidohydrolase_L-aspartate:L-glutamine amido-ligase (AMP-forming)	0
R00269 L-glutamine amidohydrolase_2-oxoglutaramate amidohydrolase	2-oxoglutaramate[c] + h2o[c] <==> 2-oxoglutarate[c] + ammonia[c]	2-oxoglutaramate[c] + h2o[c] <=> 2-oxoglutarate[c] + ammonia[c]	-1000	1000	0	R00269	L-glutamine amidohydrolase_2-oxoglutaramate amidohydrolase	1
R01135 L-glutamine amidohydrolase_IMP:L-aspartate ligase (GDP-forming)	gtp[c] + imp[c] + l-aspartate[c] <==> gdp[c] + n6-(1,2-dicarboxyethyl)-amp[c] + orthophosphate[c]	gtp[c] + imp[c] + l-aspartate[c] <=> gdp[c] + n6-(1,2-dicarboxyethyl)-amp[c] + orthophosphate[c]	-1000	1000	0	R01135	L-glutamine amidohydrolase_IMP:L-aspartate ligase (GDP-forming)	0
R03804 L-glutamine amidohydrolase_Monoamide of a dicarboxylic acid amidohydrolase	h2o[c] + monoamide of dicarboxylate[c] <==> ammonia[c] + dicarboxylate[c]	h2o[c] + monoamide of dicarboxylate[c] <=> ammonia[c] + dicarboxylate[c]	-1000	1000	0	R03804	L-glutamine amidohydrolase_Monoamide of a dicarboxylic acid amidohydrolase	1
R00348 L-glutamine amidohydrolase_2-oxosuccinamate amidohydrolase	2-oxosuccinamate[c] + h2o[c] <==> ammonia[c] + oxaloacetate[c]	2-oxosuccinamate[c] + h2o[c] <=> ammonia[c] + oxaloacetate[c]	-1000	1000	0	R00348	L-glutamine amidohydrolase_2-oxosuccinamate amidohydrolase	1
R06134 L-glutamine amidohydrolase_	amide[c] + h2o[c] <==> ammonia[c] + carboxylate[c]	amide[c] + h2o[c] <=> ammonia[c] + carboxylate[c]	-1000	1000	0	R06134	L-glutamine amidohydrolase_	1
R04445 L-glutamine amidohydrolase_L-1-pyrroline-3-hydroxy-5-carboxylate:Natp+ oxidoreductase	(2) h2o[c] + l-1-pyrroline-3-hydroxy-5-carboxylate[c] + natp+[c] <==> h+[c] + l-erythro-4-hydroxyglutamate[c] + natph[c]	(2) h2o[c] + l-1-pyrroline-3-hydroxy-5-carboxylate[c] + natp+[c] <=> h+[c] + l-erythro-4-hydroxyglutamate[c] + natph[c]	-1000	1000	0	R04445	L-glutamine amidohydrolase_L-1-pyrroline-3-hydroxy-5-carboxylate:Natp+ oxidoreductase	0
R05051 L-glutamine amidohydrolase_L-erythro-4-Hydroxyglutamate:NAD+ oxidoreductase	h+[c] + l-erythro-4-hydroxyglutamate[c] + nadh+[c]<==> h2o[c] + l-4-hydroxyglutamate semialdehyde[c] + nad+[c]	h+[c] + l-erythro-4-hydroxyglutamate[c] + nadh+[c]<=> h2o[c] + l-4-hydroxyglutamate semialdehyde[c] + nad+[c]	-1000	1000	0	R05051	L-glutamine amidohydrolase_L-erythro-4-Hydroxyglutamate:NAD+ oxidoreductase	1
R00708 L-glutamine amidohydrolase_(S)-1-pyrroline-5-carboxylate:Natp+ oxidoreductase	(2) h2o[c] + natp+[c] + (s)-1-pyrroline-5-carboxylate[c] <==> h+[c] + l-glutamate[c] + natph[c]	(2) h2o[c] + natp+[c] + (s)-1-pyrroline-5-carboxylate[c] <=> h+[c] + l-glutamate[c] + natph[c]	-1000	1000	0	R00708	L-glutamine amidohydrolase_(S)-1-pyrroline-5-carboxylate:Natp+ oxidoreductase	0
R04444 L-glutamine amidohydrolase_L-1-pyrroline-3-hydroxy-5-carboxylate:NAD+ oxidoreductase	(2) h2o[c] + l-1-pyrroline-3-hydroxy-5-carboxylate[c] + nad+[c] <==> h+[c] + l-erythro-4-hydroxyglutamate[c] + nadh[c]	(2) h2o[c] + l-1-pyrroline-3-hydroxy-5-carboxylate[c] + nad+[c] <=> h+[c] + l-erythro-4-hydroxyglutamate[c] + nadh[c]	-1000	1000	0	R04444	L-glutamine amidohydrolase_L-1-pyrroline-3-hydroxy-5-carboxylate:NAD+ oxidoreductase	0
R00707 L-glutamine amidohydrolase₍S)-1-pyrroline-5-carboxylate:NAD+ oxidoreductase	(2) h2o[c] + nad+[c] + (s)-1-pyrroline-5-carboxylate[c] <==> h+[c] + l-glutamate[c] + nadh[c]	(2) h2o[c] + nad+[c] + (s)-1-pyrroline-5-carboxylate[c] <=> h+[c] + l-glutamate[c] + nadh[c]	-1000	1000	0	R00707	L-glutamine amidohydrolase₍S)-1-pyrroline-5-carboxylate:NAD+ oxidoreductase	0
R00713 L-glutamine amidohydrolase_succinate-semialdehyde:NAD+ oxidoreductase	h2o[c] + nad+[c] + succinate semialdehyde[c] <==> h+[c] + nadh+[c]+ succinate[c]	h2o[c] + nad+[c] + succinate semialdehyde[c] <=> h+[c] + nadh+[c]+ succinate[c]	-1000	1000	0	R00713	L-glutamine amidohydrolase_succinate-semialdehyde:NAD+ oxidoreductase	1
R00768 L-glutamine amidohydrolase_L-glutamine:D-fructose-6-phosphate isomerase (deaminating); L-glutamine:D-fructose-6-phosphate aminotransferase (hexose isomerizing)	d-fructose 6-phosphate[c] + l-glutamine[c] <==> d-glucosamine 6-phosphate[c] + l-glutamate[c]	d-fructose 6-phosphate[c] + l-glutamine[c] <=> d-glucosamine 6-phosphate[c] + l-glutamate[c]	-1000	1000	0	R00768	L-glutamine amidohydrolase_L-glutamine:D-fructose-6-phosphate isomerase (deaminating); L-glutamine:D-fructose-6-phosphate aminotransferase (hexose isomerizing)	0
R00245 L-glutamine amidohydrolase_L-glutamate gamma-semialdehyde:NAD+ oxidoreductase	h2o[c] + l-glutamate 5-semialdehyde[c] + nad+[c] <==> h+[c] + l-glutamate[c] + nadh[c]	h2o[c] + l-glutamate 5-semialdehyde[c] + nad+[c] <=> h+[c] + l-glutamate[c] + nadh[c]	-1000	1000	0	R00245	L-glutamine amidohydrolase_L-glutamate gamma-semialdehyde:NAD+ oxidoreductase	0
R01514 Glycine, serine and threonine metabolism_atp:(R)-glycerate 3-phosphotransferase	atp[c] + d-glycerate[c] <==> 3-phospho-d-glycerate[c] + atp[c]	atp[c] + d-glycerate[c] <=> 3-phospho-d-glycerate[c] + atp[c]	-1000	1000	0	R01514	Glycine, serine and threonine metabolism_atp:(R)-glycerate 3-phosphotransferase	0
R04173 Glycine, serine and threonine metabolism_L-threonine ammonia-lyase (2-oxobutanoate-forming)	2-oxoglutarate[c] + o-phospho-l-serine[c] <==> 3-phosphonooxypyruvate[c] + l-glutamate[c]	2-oxoglutarate[c] + o-phospho-l-serine[c] <=> 3-phosphonooxypyruvate[c] + l-glutamate[c]	-1000	1000	0	R04173	Glycine, serine and threonine metabolism_L-threonine ammonia-lyase (2-oxobutanoate-forming)	1
R05085 Glycine, serine and threonine metabolism_O-Phospho-4-hydroxy-L-threonine:2-oxoglutarate aminotransferase	2-oxoglutarate[c] + o-phospho-4-hydroxy-l-threonine[c] <==> 2-oxo-3-hydroxy-4-phosphobutanoate[c] + l-glutamate[c]	2-oxoglutarate[c] + o-phospho-4-hydroxy-l-threonine[c] <=> 2-oxo-3-hydroxy-4-phosphobutanoate[c] + l-glutamate[c]	-1000	1000	0	R05085	Glycine, serine and threonine metabolism_O-Phospho-4-hydroxy-L-threonine:2-oxoglutarate aminotransferase	1
R00996 Glycine, serine and threonine metabolism_L-threonine ammonia-lyase (2-oxobutanoate-forming)	l-threonine[c] <==> 2-oxobutanoate[c] + ammonia[c]	l-threonine[c] <=> 2-oxobutanoate[c] + ammonia[c]	-1000	1000	0	R00996	Glycine, serine and threonine metabolism_L-threonine ammonia-lyase (2-oxobutanoate-forming)	0
R00891 Glycine, serine and threonine metabolism_L-serine hydro-lyase (adding hydrogen sulfide, L-cysteine-forming)	hydrogen sulfide[c] + l-serine[c] <==> h2o[c] + l-cysteine[c]	hydrogen sulfide[c] + l-serine[c] <=> h2o[c] + l-cysteine[c]	-1000	1000	0	R00891	Glycine, serine and threonine metabolism_L-serine hydro-lyase (adding hydrogen sulfide, L-cysteine-forming)	0
R01289 Glycine, serine and threonine metabolism_L-Serine hydro-lyase (adding homocysteine)	l-homocysteine[c] + l-serine[c] <==> cystathionine[c] + h2o[c]	l-homocysteine[c] + l-serine[c] <=> cystathionine[c] + h2o[c]	-1000	1000	0	R01289	Glycine, serine and threonine metabolism_L-Serine hydro-lyase (adding homocysteine)	1
R04942 Glycine, serine and threonine metabolism_L-Serine hydro-lyase (adding homocysteine)	l-serine[c] + selenohomocysteine[c] <==> h2o[c] + l-selenocystathionine[c]	l-serine[c] + selenohomocysteine[c] <=> h2o[c] + l-selenocystathionine[c]	-1000	1000	0	R04942	Glycine, serine and threonine metabolism_L-Serine hydro-lyase (adding homocysteine)	1
R08632 Glycine, serine and threonine metabolism_L-cystathionine cysteine-lyase	l-cystathionine[c] <==> 2-aminobut-2-enoate[c] + l-cysteine[c]	l-cystathionine[c] <=> 2-aminobut-2-enoate[c] + l-cysteine[c]	-1000	1000	0	R08632	Glycine, serine and threonine metabolism_L-cystathionine cysteine-lyase	0
R08637 Glycine, serine and threonine metabolism_2-Aminobut-2-enoate aminohydrolase (spontaneous)	2-aminobut-2-enoate[c] + h2o[c] <==> 2-oxobutanoate[c] + ammonia[c]	2-aminobut-2-enoate[c] + h2o[c] <=> 2-oxobutanoate[c] + ammonia[c]	-1000	1000	0	R08637	Glycine, serine and threonine metabolism_2-Aminobut-2-enoate aminohydrolase (spontaneous)	0
R00782 Glycine, serine and threonine metabolism_L-Cysteine hydrogen-sulfide-lyase (deaminating; pyruvate-forming)	h2o[c] + l-cysteine[c] <==> ammonia[c] + hydrogen sulfide[c] + pyruvate[c]	h2o[c] + l-cysteine[c] <=> ammonia[c] + hydrogen sulfide[c] + pyruvate[c]	-1000	1000	0	R00782	Glycine, serine and threonine metabolism_L-Cysteine hydrogen-sulfide-lyase (deaminating; pyruvate-forming)	0
R02408 Glycine, serine and threonine metabolism_L-Cystine L-Cysteine-lyase (deaminating)	h2o[c] + l-cystine[c] <==> ammonia[c] + pyruvate[c] + thiocysteine[c]	h2o[c] + l-cystine[c] <=> ammonia[c] + pyruvate[c] + thiocysteine[c]	-1000	1000	0	R02408	Glycine, serine and threonine metabolism_L-Cystine L-Cysteine-lyase (deaminating)	1
R04770 Glycine, serine and threonine metabolism_Selenomethionine methanethiol-lyase (deaminating)	h2o[c] + l-selenomethionine[c] <==> 2-oxobutanoate[c] + ammonia[c] + methaneselenol[c]	h2o[c] + l-selenomethionine[c] <=> 2-oxobutanoate[c] + ammonia[c] + methaneselenol[c]	-1000	1000	0	R04770	Glycine, serine and threonine metabolism_Selenomethionine methanethiol-lyase (deaminating)	1
R04930 Glycine, serine and threonine metabolism_Selenocystathionine Lysteine-lyase (deaminating)	h2o[c] + l-selenocystathionine[c] <==> 2-oxobutanoate[c] + ammonia[c] + l-selenocysteine[c]	h2o[c] + l-selenocystathionine[c] <=> 2-oxobutanoate[c] + ammonia[c] + l-selenocysteine[c]	-1000	1000	0	R04930	Glycine, serine and threonine metabolism_Selenocystathionine Lysteine-lyase (deaminating)	0
R09366 Glycine, serine and threonine metabolism_Se-methyl-L-selenocysteine methaneselenol-lyase (deaminating; pyruvate-forming)	h2o[c] + se-methyl-l-selenocysteine[c] <==> ammonia[c] + methaneselenol[c] + pyruvate[c]	h2o[c] + se-methyl-l-selenocysteine[c] <=> ammonia[c] + methaneselenol[c] + pyruvate[c]	-1000	1000	0	R09366	Glycine, serine and threonine metabolism_Se-methyl-L-selenocysteine methaneselenol-lyase (deaminating; pyruvate-forming)	1
R00610 Glycine, serine and threonine metabolism_sarcosine:oxygen oxidoreductase (demethylating)	h2o[c] + oxygen[c] + sarcosine[c] <==> formaldehyde[c] + glycine[c] + hydrogen peroxide[c]	h2o[c] + oxygen[c] + sarcosine[c] <=> formaldehyde[c] + glycine[c] + hydrogen peroxide[c]	-1000	1000	0	R00610	Glycine, serine and threonine metabolism_sarcosine:oxygen oxidoreductase (demethylating)	1
R03425 Glycine, serine and threonine metabolism_glycine:lipoylprotein oxidoreductase (decarboxylating and acceptor-aminomethylating)	glycine[c] + lipoylprotein[c] <==> co2[c] + s-aminomethyldihydrolipoylprotein[c]	glycine[c] + lipoylprotein[c] <=> co2[c] + s-aminomethyldihydrolipoylprotein[c]	-1000	1000	0	R03425	Glycine, serine and threonine metabolism_glycine:lipoylprotein oxidoreductase (decarboxylating and acceptor-aminomethylating)	0
R08550 Glycine, serine and threonine metabolism_protein N6-(dihydrolipoyl)lysine:NAD+ oxidoreductase	nad+[c] + protein n6-(dihydrolipoyl)lysine[c] <==> h+[c] + nadh+[c]+ protein n6-(lipoyl)lysine[c]	nad+[c] + protein n6-(dihydrolipoyl)lysine[c] <=> h+[c] + nadh+[c]+ protein n6-(lipoyl)lysine[c]	-1000	1000	0	R08550	Glycine, serine and threonine metabolism_protein N6-(dihydrolipoyl)lysine:NAD+ oxidoreductase	1
R00830 Glycine, serine and threonine metabolism_succinyl-CoA:glycine C-succinyltransferase (decarboxylating)	glycine[c] + succinyl-coa[c] <==> 5-aminolevulinate[c] + co2[c] + coa[c]	glycine[c] + succinyl-coa[c] <=> 5-aminolevulinate[c] + co2[c] + coa[c]	-1000	1000	0	R00830	Glycine, serine and threonine metabolism_succinyl-CoA:glycine C-succinyltransferase (decarboxylating)	0
(1) R00751 Glycine, serine and threonine metabolism_L-threonine acetaldehyde-lyase (glycine-forming)	l-threonine[c] <==> acetaldehyde[c] + glycine[c]	l-threonine[c] <=> acetaldehyde[c] + glycine[c]	-1000	1000	0	R00751	Glycine, serine and threonine metabolism_L-threonine acetaldehyde-lyase (glycine-forming)	0
R00371 Glycine, serine and threonine metabolism_Acetyl-CoA:glycine C-acetyltransferase	acetyl-coa[c] + glycine[c] <==> coa[c] + l-2-amino-3-oxobutanoic acid[c]	acetyl-coa[c] + glycine[c] <=> coa[c] + l-2-amino-3-oxobutanoic acid[c]	-1000	1000	0	R00371	Glycine, serine and threonine metabolism_Acetyl-CoA:glycine C-acetyltransferase	1
(2) R00751 Glycine, serine and threonine metabolism_L-threonine acetaldehyde-lyase (glycine-forming)	l-threonine[c] <==> acetaldehyde[c] + glycine[c]	l-threonine[c] <=> acetaldehyde[c] + glycine[c]	-1000	1000	0	R00751	Glycine, serine and threonine metabolism_L-threonine acetaldehyde-lyase (glycine-forming)	0
R09099 Glycine, serine and threonine metabolism_5,10-methylenetetrahydromethanopterin:glycine hydroxymethyltransferase	5,6,7,8-tetrahydromethanopterin[c] + l-serine[c] <==> 5,10-methylenetetrahydromethanopterin[c] + glycine[c] + h2o[c]	5,6,7,8-tetrahydromethanopterin[c] + l-serine[c] <=> 5,10-methylenetetrahydromethanopterin[c] + glycine[c] + h2o[c]	-1000	1000	0	R09099	Glycine, serine and threonine metabolism_5,10-methylenetetrahydromethanopterin:glycine hydroxymethyltransferase	1
R01853 Glycine, serine and threonine metabolism_RCH2NH2:oxygen oxidoreductase(deaminating)(flavin-containing);RCH2NH2:oxygen oxidoreductase (deaminating) (copper-containing)	h2o[c] + oxygen[c] + primary amine[c] <==> aldehyde[c] + ammonia[c] + hydrogen peroxide[c]	h2o[c] + oxygen[c] + primary amine[c] <=> aldehyde[c] + ammonia[c] + hydrogen peroxide[c]	-1000	1000	0	R01853	Glycine, serine and threonine metabolism_RCH2NH2:oxygen oxidoreductase(deaminating)(flavin-containing);RCH2NH2:oxygen oxidoreductase (deaminating) (copper-containing)	1
R02173 Glycine, serine and threonine metabolism_Tryptamine:oxygen oxidoreductase(deaminating)	h2o[c] + oxygen[c] + tryptamine[c] <==> ammonia[c] + hydrogen peroxide[c] + indole-3-acetaldehyde[c]	h2o[c] + oxygen[c] + tryptamine[c] <=> ammonia[c] + hydrogen peroxide[c] + indole-3-acetaldehyde[c]	-1000	1000	0	R02173	Glycine, serine and threonine metabolism_Tryptamine:oxygen oxidoreductase(deaminating)	1
R02382 Glycine, serine and threonine metabolism_Tyramine:oxygen oxidoreductase(deaminating)(flavin-containing)	h2o[c] + oxygen[c] + tyramine[c] <==> 4-hydroxyphenylacetaldehyde[c] + ammonia[c] + hydrogen peroxide[c]	h2o[c] + oxygen[c] + tyramine[c] <=> 4-hydroxyphenylacetaldehyde[c] + ammonia[c] + hydrogen peroxide[c]	-1000	1000	0	R02382	Glycine, serine and threonine metabolism_Tyramine:oxygen oxidoreductase(deaminating)(flavin-containing)	1
R02529 Glycine, serine and threonine metabolism_aminoacetone:oxygen oxidoreductase(deaminating)	aminoacetone[c] + h2o[c] + oxygen[c] <==> ammonia[c] + hydrogen peroxide[c] + methylglyoxal[c]	aminoacetone[c] + h2o[c] + oxygen[c] <=> ammonia[c] + hydrogen peroxide[c] + methylglyoxal[c]	-1000	1000	0	R02529	Glycine, serine and threonine metabolism_aminoacetone:oxygen oxidoreductase(deaminating)	1
R02532 Glycine, serine and threonine metabolism_4-[(1R)-2-Amino-1-hydroxyethyl]-1,2-benzenediol:oxygen oxidoreductase(deaminating)(flavin-containing)	h2o[c] + l-noradrenaline[c] + oxygen[c] <==> 3,4-dihydroxymandelaldehyde[c] + ammonia[c] + hydrogen peroxide[c]	h2o[c] + l-noradrenaline[c] + oxygen[c] <=> 3,4-dihydroxymandelaldehyde[c] + ammonia[c] + hydrogen peroxide[c]	-1000	1000	0	R02532	Glycine, serine and threonine metabolism_4-[(1R)-2-Amino-1-hydroxyethyl]-1,2-benzenediol:oxygen oxidoreductase(deaminating)(flavin-containing)	1
R02613 Glycine, serine and threonine metabolism_Phenethylamine:oxygen oxidoreductase (deaminating)	h2o[c] + oxygen[c] + phenethylamine[c] <==> ammonia[c] + hydrogen peroxide[c] + phenylacetaldehyde[c]	h2o[c] + oxygen[c] + phenethylamine[c] <=> ammonia[c] + hydrogen peroxide[c] + phenylacetaldehyde[c]	-1000	1000	0	R02613	Glycine, serine and threonine metabolism_Phenethylamine:oxygen oxidoreductase (deaminating)	1
R02908 Glycine, serine and threonine metabolism_5-Hydroxytryptamine:oxygen oxidoreductase(deaminating)(flavin-containing)	h2o[c] + oxygen[c] + serotonin[c] <==> 5-hydroxyindoleacetaldehyde[c] + ammonia[c] + hydrogen peroxide[c]	h2o[c] + oxygen[c] + serotonin[c] <=> 5-hydroxyindoleacetaldehyde[c] + ammonia[c] + hydrogen peroxide[c]	-1000	1000	0	R02908	Glycine, serine and threonine metabolism_5-Hydroxytryptamine:oxygen oxidoreductase(deaminating)(flavin-containing)	1
R04025 Glycine, serine and threonine metabolism_N-Acetylputrescine:oxygen oxidoreductase(deaminating)(flavin-containing)	h2o[c] + n-acetylputrescine[c] + oxygen[c] <==> ammonia[c] + hydrogen peroxide[c] + n4-acetylaminobutanal[c]	h2o[c] + n-acetylputrescine[c] + oxygen[c] <=> ammonia[c] + hydrogen peroxide[c] + n4-acetylaminobutanal[c]	-1000	1000	0	R04025	Glycine, serine and threonine metabolism_N-Acetylputrescine:oxygen oxidoreductase(deaminating)(flavin-containing)	1
R04300 Glycine, serine and threonine metabolism_4-(2-Aminoethyl)-1,2-benzenediol:oxygen oxidoreductase(deaminating)(flavin-containing)	dopamine[c] + h2o[c] + oxygen[c] <==> 3,4-dihydroxyphenylacetaldehyde[c] + ammonia[c] + hydrogen peroxide[c]	dopamine[c] + h2o[c] + oxygen[c] <=> 3,4-dihydroxyphenylacetaldehyde[c] + ammonia[c] + hydrogen peroxide[c]	-1000	1000	0	R04300	Glycine, serine and threonine metabolism_4-(2-Aminoethyl)-1,2-benzenediol:oxygen oxidoreductase(deaminating)(flavin-containing)	1
R04674 Glycine, serine and threonine metabolism_N-methylhistamine:oxygen oxidoreductase (deaminating)	h2o[c] + n-methylhistamine[c] + oxygen[c] <==> ammonia[c] + hydrogen peroxide[c] + methylimidazole acetaldehyde[c]	h2o[c] + n-methylhistamine[c] + oxygen[c] <=> ammonia[c] + hydrogen peroxide[c] + methylimidazole acetaldehyde[c]	-1000	1000	0	R04674	Glycine, serine and threonine metabolism_N-methylhistamine:oxygen oxidoreductase (deaminating)	1
R04890 Glycine, serine and threonine metabolism_3-Methoxytyramine:oxygen oxidoreductase (deaminating) (copper-containing)	3-methoxytyramine[c] + h2o[c] + oxygen[c] <==> 3-methoxy-4-hydroxyphenylacetaldehyde[c] + ammonia[c] + hydrogen peroxide[c]	3-methoxytyramine[c] + h2o[c] + oxygen[c] <=> 3-methoxy-4-hydroxyphenylacetaldehyde[c] + ammonia[c] + hydrogen peroxide[c]	-1000	1000	0	R04890	Glycine, serine and threonine metabolism_3-Methoxytyramine:oxygen oxidoreductase (deaminating) (copper-containing)	1
R04893 Glycine, serine and threonine metabolism_L-Normetanephrine:oxygen oxidoreductase (deaminating) (copper-containing)	h2o[c] + l-normetanephrine[c] + oxygen[c] <==> 3-methoxy-4-hydroxyphenylglycolaldehyde[c] + ammonia[c] + hydrogen peroxide[c]	h2o[c] + l-normetanephrine[c] + oxygen[c] <=> 3-methoxy-4-hydroxyphenylglycolaldehyde[c] + ammonia[c] + hydrogen peroxide[c]	-1000	1000	0	R04893	Glycine, serine and threonine metabolism_L-Normetanephrine:oxygen oxidoreductase (deaminating) (copper-containing)	1
R08348 Glycine, serine and threonine metabolism_didemethylcitalopram:oxygen oxidoreductase(deaminating)(flavin-containing)	didemethylcitalopram[c] + h2o[c] + oxygen[c] <==> ammonia[c] + citalopram aldehyde[c] + hydrogen peroxide[c]	didemethylcitalopram[c] + h2o[c] + oxygen[c] <=> ammonia[c] + citalopram aldehyde[c] + hydrogen peroxide[c]	-1000	1000	0	R08348	Glycine, serine and threonine metabolism_didemethylcitalopram:oxygen oxidoreductase(deaminating)(flavin-containing)	1
R02919 Glycine, serine and threonine metabolism_4-[(1R)-1-Hydroxy-2-(methylamino)ethyl]-1,2-benzenediol:oxygen oxidoreductase(deaminating)(flavin-containing)	h2o[c] + l-adrenaline[c] + oxygen[c] <==> 3,4-dihydroxymandelaldehyde[c] + hydrogen peroxide[c] + methylamine[c]	h2o[c] + l-adrenaline[c] + oxygen[c] <=> 3,4-dihydroxymandelaldehyde[c] + hydrogen peroxide[c] + methylamine[c]	-1000	1000	0	R02919	Glycine, serine and threonine metabolism_4-[(1R)-1-Hydroxy-2-(methylamino)ethyl]-1,2-benzenediol:oxygen oxidoreductase(deaminating)(flavin-containing)	1
R04894 Glycine, serine and threonine metabolism_L-Metanephrine:oxygen oxidoreductase (deaminating) (flavin-containing)	h2o[c] + l-metanephrine[c] + oxygen[c] <==> 3-methoxy-4-hydroxyphenylglycolaldehyde[c] + hydrogen peroxide[c] + methylamine[c]	h2o[c] + l-metanephrine[c] + oxygen[c] <=> 3-methoxy-4-hydroxyphenylglycolaldehyde[c] + hydrogen peroxide[c] + methylamine[c]	-1000	1000	0	R04894	Glycine, serine and threonine metabolism_L-Metanephrine:oxygen oxidoreductase (deaminating) (flavin-containing)	1
R04907 Glycine, serine and threonine metabolism_3-Hydroxykynurenamine:oxygen oxidoreductase(deaminating)(flavin-containing)	3-hydroxykynurenamine[c] + oxygen[c] <==> 4,8-dihydroxyquinoline[c] + ammonia[c] + hydrogen peroxide[c]	3-hydroxykynurenamine[c] + oxygen[c] <=> 4,8-dihydroxyquinoline[c] + ammonia[c] + hydrogen peroxide[c]	-1000	1000	0	R04907	Glycine, serine and threonine metabolism_3-Hydroxykynurenamine:oxygen oxidoreductase(deaminating)(flavin-containing)	1
R04908 Glycine, serine and threonine metabolism_5-Hydroxykynurenamine:oxygen oxidoreductase(deaminating)(flavin-containing)	5-hydroxykynurenamine[c] + h2o[c] + oxygen[c] <==> 4,6-dihydroxyquinoline[c] + ammonia[c] + h2o[c] + hydrogen peroxide[c]	5-hydroxykynurenamine[c] + h2o[c] + oxygen[c] <=> 4,6-dihydroxyquinoline[c] + ammonia[c] + h2o[c] + hydrogen peroxide[c]	-1000	1000	0	R04908	Glycine, serine and threonine metabolism_5-Hydroxykynurenamine:oxygen oxidoreductase(deaminating)(flavin-containing)	1
R08346 Glycine, serine and threonine metabolism_Citalopram:oxygen oxidoreductase(deaminating)(flavin-containing)	citalopram[c] + h2o[c] + oxygen[c] <==> citalopram aldehyde[c] + dimethylamine[c] + hydrogen peroxide[c]	citalopram[c] + h2o[c] + oxygen[c] <=> citalopram aldehyde[c] + dimethylamine[c] + hydrogen peroxide[c]	-1000	1000	0	R08346	Glycine, serine and threonine metabolism_Citalopram:oxygen oxidoreductase(deaminating)(flavin-containing)	1
R08347 Glycine, serine and threonine metabolism_Demethylcitalopram:oxygen oxidoreductase(deaminating)(flavin-containing)	demethylcitalopram[c] + h2o[c] + oxygen[c] <==> citalopram aldehyde[c] + hydrogen peroxide[c] + methylamine[c]	demethylcitalopram[c] + h2o[c] + oxygen[c] <=> citalopram aldehyde[c] + hydrogen peroxide[c] + methylamine[c]	-1000	1000	0	R08347	Glycine, serine and threonine metabolism_Demethylcitalopram:oxygen oxidoreductase(deaminating)(flavin-containing)	1
R04125 Glycine, serine and threonine metabolism_S-aminomethyldihydrolipoylprotein:(6S)-tetrahydrofolate aminomethyltransferase (ammonia-forming)	s-aminomethyldihydrolipoylprotein[c] + tetrahydrofolate[c] <==> 5,10-methylenetetrahydrofolate[c] + ammonia[c] + dihydrolipoylprotein[c]	s-aminomethyldihydrolipoylprotein[c] + tetrahydrofolate[c] <=> 5,10-methylenetetrahydrofolate[c] + ammonia[c] + dihydrolipoylprotein[c]	-1000	1000	0	R04125	Glycine, serine and threonine metabolism_S-aminomethyldihydrolipoylprotein:(6S)-tetrahydrofolate aminomethyltransferase (ammonia-forming)	0
R01221 Glycine, serine and threonine metabolism_glycine synthase; glycine cleavage system	glycine[c] + nad+[c] + tetrahydrofolate[c] <==> 5,10-methylenetetrahydrofolate[c] + ammonia[c] + co2[c] + h+[c] + nadh[c]	glycine[c] + nad+[c] + tetrahydrofolate[c] <=> 5,10-methylenetetrahydrofolate[c] + ammonia[c] + co2[c] + h+[c] + nadh[c]	-1000	1000	0	R01221	Glycine, serine and threonine metabolism_glycine synthase; glycine cleavage system	0
R02300 Glycine, serine and threonine metabolism_S-Aminomethyldihydrolipoylprotein:(6S)-tetrahydrofolate aminomethyltransferase (ammonia-forming)	folinic acid[c] <==> 5,10-methenyltetrahydrofolate[c] + h2o[c]	folinic acid[c] <=> 5,10-methenyltetrahydrofolate[c] + h2o[c]	-1000	1000	0	R02300	Glycine, serine and threonine metabolism_S-Aminomethyldihydrolipoylprotein:(6S)-tetrahydrofolate aminomethyltransferase (ammonia-forming)	1
R03815 Glycine, serine and threonine metabolism_dihydrolipoylprotein:NAD+ oxidoreductase	dihydrolipoylprotein[c] + nad+[c] <==> h+[c] + lipoylprotein[c] + nadh[c]	dihydrolipoylprotein[c] + nad+[c] <=> h+[c] + lipoylprotein[c] + nadh[c]	-1000	1000	0	R03815	Glycine, serine and threonine metabolism_dihydrolipoylprotein:NAD+ oxidoreductase	0
R07618 Glycine, serine and threonine metabolism_enzyme N6-(dihydrolipoyl)lysine:NAD+ oxidoreductase	enzyme n6-(dihydrolipoyl)lysine[c] + nad+[c] <==> enzyme n6-(lipoyl)lysine[c] + h+[c] + nadh[c]	enzyme n6-(dihydrolipoyl)lysine[c] + nad+[c] <=> enzyme n6-(lipoyl)lysine[c] + h+[c] + nadh[c]	-1000	1000	0	R07618	Glycine, serine and threonine metabolism_enzyme N6-(dihydrolipoyl)lysine:NAD+ oxidoreductase	0
R01698 Glycine, serine and threonine metabolism_Dihydrolipoamide:NAD+ oxidoreductase	dihydrolipoamide[c] + nad+[c] <==> h+[c] + lipoamide[c] + nadh[c]	dihydrolipoamide[c] + nad+[c] <=> h+[c] + lipoamide[c] + nadh[c]	-1000	1000	0	R01698	Glycine, serine and threonine metabolism_Dihydrolipoamide:NAD+ oxidoreductase	1
R01933 Glycine, serine and threonine metabolism_2-oxoadipate dehydrogenase complex	2-oxoadipate[c] + coa[c] + nad+[c] <==> co2[c] + glutaryl-coa[c] + h+[c] + nadh[c]	2-oxoadipate[c] + coa[c] + nad+[c] <=> co2[c] + glutaryl-coa[c] + h+[c] + nadh[c]	-1000	1000	0	R01933	Glycine, serine and threonine metabolism_2-oxoadipate dehydrogenase complex	1
R08549 Glycine, serine and threonine metabolism_2-Oxoglutarate dehydrogenase complex	2-oxoglutarate[c] + coa[c] + nad+[c] <==> co2[c] + h+[c] + nadh+[c]+ succinyl-coa[c]	2-oxoglutarate[c] + coa[c] + nad+[c] <=> co2[c] + h+[c] + nadh+[c]+ succinyl-coa[c]	-1000	1000	0	R08549	Glycine, serine and threonine metabolism_2-Oxoglutarate dehydrogenase complex	0
R00996 Valine, leucine and isoleucine biosynthesis_L-threonine ammonia-lyase (2-oxobutanoate-forming)	l-threonine[c] <==> 2-oxobutanoate[c] + ammonia[c]	l-threonine[c] <=> 2-oxobutanoate[c] + ammonia[c]	-1000	1000	0	R00996	Valine, leucine and isoleucine biosynthesis_L-threonine ammonia-lyase (2-oxobutanoate-forming)	0
R01214 Valine, leucine and isoleucine biosynthesis_L-Valine:2-oxoglutarate aminotransferase	2-oxoglutarate[c] + l-valine[c] <==> 3-methyl-2-oxobutanoic acid[c] + l-glutamate[c]	2-oxoglutarate[c] + l-valine[c] <=> 3-methyl-2-oxobutanoic acid[c] + l-glutamate[c]	-1000	1000	0	R01214	Valine, leucine and isoleucine biosynthesis_L-Valine:2-oxoglutarate aminotransferase	1
R02199 Valine, leucine and isoleucine biosynthesis_L-Isoleucine:2-oxoglutarate aminotransferase	2-oxoglutarate[c] + l-isoleucine[c] <==> l-glutamate[c] + (s)-3-methyl-2-oxopentanoic acid[c]	2-oxoglutarate[c] + l-isoleucine[c] <=> l-glutamate[c] + (s)-3-methyl-2-oxopentanoic acid[c]	-1000	1000	0	R02199	Valine, leucine and isoleucine biosynthesis_L-Isoleucine:2-oxoglutarate aminotransferase	1
R02735 Lysine biosynthesis_LL-2,6-Diaminoheptanedioate 2-epimerase	ll-2,6-diaminoheptanedioate[c] <==> meso-2,6-diaminoheptanedioate[c]	ll-2,6-diaminoheptanedioate[c] <=> meso-2,6-diaminoheptanedioate[c]	-1000	1000	0	R02735	Lysine biosynthesis_LL-2,6-Diaminoheptanedioate 2-epimerase	1
R00451 Lysine biosynthesis_meso-2,6-diaminoheptanedioate carboxy-lyase (L-lysine-forming)	meso-2,6-diaminoheptanedioate[c] <==> co2[c] + l-lysine[c]	meso-2,6-diaminoheptanedioate[c] <=> co2[c] + l-lysine[c]	-1000	1000	0	R00451	Lysine biosynthesis_meso-2,6-diaminoheptanedioate carboxy-lyase (L-lysine-forming)	0
R03102 Lysine biosynthesis_L-2-Aminoadipate-6-semialdehyde:NAD+ 6-oxidoreductase	h2o[c] + l-2-aminoadipate 6-semialdehyde[c] + nad+[c] <==> h+[c] + l-2-aminoadipate[c] + nadh[c]	h2o[c] + l-2-aminoadipate 6-semialdehyde[c] + nad+[c] <=> h+[c] + l-2-aminoadipate[c] + nadh[c]	-1000	1000	0	R03102	Lysine biosynthesis_L-2-Aminoadipate-6-semialdehyde:NAD+ 6-oxidoreductase	1
R00716 Lysine degradation_N6-(L-1,3-Dicarboxypropyl)-L-lysine:Natp+ oxidoreductase (L-lysine-forming)	h2o[c] + n6-(l-1,3-dicarboxypropyl)-l-lysine[c] + natp+[c] <==> 2-oxoglutarate[c] + h+[c] + l-lysine[c] + natph[c]	h2o[c] + n6-(l-1,3-dicarboxypropyl)-l-lysine[c] + natp+[c] <=> 2-oxoglutarate[c] + h+[c] + l-lysine[c] + natph[c]	-1000	1000	0	R00716	Lysine degradation_N6-(L-1,3-Dicarboxypropyl)-L-lysine:Natp+ oxidoreductase (L-lysine-forming)	0
R02313 Lysine degradation_N6-(L-1,3-Dicarboxypropyl)-L-lysine:NAD+ oxidoreductase; N6-(L-1,3-Dicarboxypropyl)-L-lysine:NAD+ oxidoreductase (L-glutamate-forming)	h2o[c] + n6-(l-1,3-dicarboxypropyl)-l-lysine[c] + nad+[c] <==> h+[c] + l-2-aminoadipate 6-semialdehyde[c] + l-glutamate[c] + nadh[c]	h2o[c] + n6-(l-1,3-dicarboxypropyl)-l-lysine[c] + nad+[c] <=> h+[c] + l-2-aminoadipate 6-semialdehyde[c] + l-glutamate[c] + nadh[c]	-1000	1000	0	R02313	Lysine degradation_N6-(L-1,3-Dicarboxypropyl)-L-lysine:NAD+ oxidoreductase; N6-(L-1,3-Dicarboxypropyl)-L-lysine:NAD+ oxidoreductase (L-glutamate-forming)	0
R01700 Lysine degradation_2-oxoglutarate:[dihydrolipoyllysine-residue succinyltransferase]-lipoyllysine 2-oxidoreductase (decarboxylating, acceptor-succinylating)	2-oxoglutarate[c] + enzyme n6-(lipoyl)lysine[c] <==> co2[c] + [dihydrolipoyllysine-residue succinyltransferase] s-succinyldihydrolipoyllysine[c]	2-oxoglutarate[c] + enzyme n6-(lipoyl)lysine[c] <=> co2[c] + [dihydrolipoyllysine-residue succinyltransferase] s-succinyldihydrolipoyllysine[c]	-1000	1000	0	R01700	Lysine degradation_2-oxoglutarate:[dihydrolipoyllysine-residue succinyltransferase]-lipoyllysine 2-oxidoreductase (decarboxylating, acceptor-succinylating)	0
R02570 Lysine degradation_succinyl-CoA:enzyme N6-(dihydrolipoyl)lysine S-succinyltransferase	enzyme n6-(dihydrolipoyl)lysine[c] + succinyl-coa[c] <==> coa[c] + [dihydrolipoyllysine-residue succinyltransferase] s-succinyldihydrolipoyllysine[c]	enzyme n6-(dihydrolipoyl)lysine[c] + succinyl-coa[c] <=> coa[c] + [dihydrolipoyllysine-residue succinyltransferase] s-succinyldihydrolipoyllysine[c]	-1000	1000	0	R02570	Lysine degradation_succinyl-CoA:enzyme N6-(dihydrolipoyl)lysine S-succinyltransferase	0
R02488 Lysine degradation_glutaryl-CoA:electron-transfer flavoprotein 2,3-oxidoreductase (decarboxylating)	electron-transferring flavoprotein[c] + glutaryl-coa[c] <==> co2[c] + crotonoyl-coa[c] + reduced electron-transferring flavoprotein[c]	electron-transferring flavoprotein[c] + glutaryl-coa[c] <=> co2[c] + crotonoyl-coa[c] + reduced electron-transferring flavoprotein[c]	-1000	1000	0	R02488	Lysine degradation_glutaryl-CoA:electron-transfer flavoprotein 2,3-oxidoreductase (decarboxylating)	1
R00135 Arginine and proline metabolism	h2o[c] + peptide[c] <==> l-proline[c] + peptide[c]	h2o[c] + peptide[c] <=> l-proline[c] + peptide[c]	-1000	1000	0	R00135	Arginine and proline metabolism	0
R01343 Arginine and proline metabolism _L-Ornithine:2-oxo-acid aminotransferase	2-oxo acid[c] + l-ornithine[c] <==> l-amino acid[c] + l-glutamate 5-semialdehyde[c]	2-oxo acid[c] + l-ornithine[c] <=> l-amino acid[c] + l-glutamate 5-semialdehyde[c]	-1000	1000	0	R01343	Arginine and proline metabolism _L-Ornithine:2-oxo-acid aminotransferase	1
R00670 Arginine and proline metabolism_L-ornithine carboxy-lyase (putrescine-forming)	l-ornithine[c] <==> co2[c] + putrescine[c]	l-ornithine[c] <=> co2[c] + putrescine[c]	-1000	1000	0	R00670	Arginine and proline metabolism_L-ornithine carboxy-lyase (putrescine-forming)	0
R01248 Arginine and proline metabolism_L-Proline:NAD+ 5-oxidoreductase	l-proline[c] + nad+[c] <==> h+[c] + nadh+[c]+ (s)-1-pyrroline-5-carboxylate[c]	l-proline[c] + nad+[c] <=> h+[c] + nadh+[c]+ (s)-1-pyrroline-5-carboxylate[c]	-1000	1000	0	R01248	Arginine and proline metabolism_L-Proline:NAD+ 5-oxidoreductase	0
R09076	Spermine + Oxygen + H2O <=> Spermidine + 3-Aminopropanal + Hydrogen peroxide	Spermine + Oxygen + H2O <=> Spermidine + 3-Aminopropanal + Hydrogen peroxide	-1000	1000	0			1
R01920 Arginine and proline metabolism_S-adenosylmethioninamine:putrescine 3-aminopropyltransferase	putrescine[c] + s-adenosylmethioninamine[c] <==> 5'-methylthioadenosine[c] + spermidine[c]	putrescine[c] + s-adenosylmethioninamine[c] <=> 5'-methylthioadenosine[c] + spermidine[c]	-1000	1000	0	R01920	Arginine and proline metabolism_S-adenosylmethioninamine:putrescine 3-aminopropyltransferase	1
R02080 Arginine and proline metabolism_3,4-Dihydroxy-L-phenylalanine carboxy-lyase	3,4-dihydroxy-l-phenylalanine[c] <==> co2[c] + dopamine[c]	3,4-dihydroxy-l-phenylalanine[c] <=> co2[c] + dopamine[c]	-1000	1000	0	R02080	Arginine and proline metabolism_3,4-Dihydroxy-L-phenylalanine carboxy-lyase	1
R02519 Tyrosine metabolism_Homogentisate:oxygen 1,2-oxidoreductase (decyclizing)	homogentisate[c] + oxygen[c] <==> 4-maleylacetoacetate[c]	homogentisate[c] + oxygen[c] <=> 4-maleylacetoacetate[c]	-1000	1000	0	R02519	Tyrosine metabolism_Homogentisate:oxygen 1,2-oxidoreductase (decyclizing)	1
R01364 Tyrosine metabolism_4-fumarylacetoacetate fumarylhydrolase	acetoacetate[c] + fumarate[c] <==> 4-fumarylacetoacetate[c] + h2o[c]	acetoacetate[c] + fumarate[c] <=> 4-fumarylacetoacetate[c] + h2o[c]	-1000	1000	0	R01364	Tyrosine metabolism_4-fumarylacetoacetate fumarylhydrolase	0
R03181 Tyrosine metabolism_4-Maleylacetoacetate cis-trans-isomerase	4-maleylacetoacetate[c] <==> 4-fumarylacetoacetate[c]	4-maleylacetoacetate[c] <=> 4-fumarylacetoacetate[c]	-1000	1000	0	R03181	Tyrosine metabolism_4-Maleylacetoacetate cis-trans-isomerase	0
R07211 Phenylalanine metabolism_L-phenylalanine,tetrahydrobiopterin:oxygen oxidoreductase(4-hydroxylating)	l-phenylalanine[c] + oxygen[c] + tetrahydrobiopterin[c] <==> 4a-hydroxytetrahydrobiopterin[c] + l-tyrosine[c]	l-phenylalanine[c] + oxygen[c] + tetrahydrobiopterin[c] <=> 4a-hydroxytetrahydrobiopterin[c] + l-tyrosine[c]	-1000	1000	0	R07211	Phenylalanine metabolism_L-phenylalanine,tetrahydrobiopterin:oxygen oxidoreductase(4-hydroxylating)	1
R01976 Phenylalanine metabolism₍S)-3-Hydroxybutanoyl-CoA:Natp+ oxidoreductase	natp+[c] + (s)-3-hydroxybutanoyl-coa[c] <==> acetoacetyl-coa[c] + h+[c] + natph[c]	natp+[c] + (s)-3-hydroxybutanoyl-coa[c] <=> acetoacetyl-coa[c] + h+[c] + natph[c]	-1000	1000	0	R01976	Phenylalanine metabolism₍S)-3-Hydroxybutanoyl-CoA:Natp+ oxidoreductase	0
R00678 Tryptophan metabolism_L-tryptophan:oxygen 2,3-oxidoreductase (decyclizing)	l-tryptophan[c] + oxygen[c] <==> l-formylkynurenine[c]	l-tryptophan[c] + oxygen[c] <=> l-formylkynurenine[c]	-1000	1000	0	R00678	Tryptophan metabolism_L-tryptophan:oxygen 2,3-oxidoreductase (decyclizing)	1
R00009 Tryptophan metabolism_hydrogen-peroxide:hydrogen-peroxide oxidoreductase	(2) hydrogen peroxide[c] <==> (2) h2o[c] + oxygen[c]	(2) hydrogen peroxide[c] <=> (2) h2o[c] + oxygen[c]	-1000	1000	0	R00009	Tryptophan metabolism_hydrogen-peroxide:hydrogen-peroxide oxidoreductase	0
R01826 Phenylalanine, tyrosine and tryptophan biosynthesis_	d-erythrose 4-phosphate[c] + h2o[c] + phosphoenolpyruvate[c] <==> 2-dehydro-3-deoxy-d-arabino-heptonate 7-phosphate[c] + orthophosphate[c]	d-erythrose 4-phosphate[c] + h2o[c] + phosphoenolpyruvate[c] <=> 2-dehydro-3-deoxy-d-arabino-heptonate 7-phosphate[c] + orthophosphate[c]	-1000	1000	0	R01826	Phenylalanine, tyrosine and tryptophan biosynthesis_	1
R01714 Phenylalanine, tyrosine and tryptophan biosynthesis₅-O-(1-Carboxyvinyl)-3-phosphoshikimate phosphate-lyase (chorismate-forming)	5-o-(1-carboxyvinyl)-3-phosphoshikimate[c] <==> chorismate[c] + orthophosphate[c]	5-o-(1-carboxyvinyl)-3-phosphoshikimate[c] <=> chorismate[c] + orthophosphate[c]	-1000	1000	0	R01714	Phenylalanine, tyrosine and tryptophan biosynthesis₅-O-(1-Carboxyvinyl)-3-phosphoshikimate phosphate-lyase (chorismate-forming)	1
R00978 beta-Alanine metabolism_5,6-Dihydrouracil:Natp+ oxidoreductase	5,6-dihydrouracil[c] + natp+[c] <==> h+[c] + natph+[c]+ uracil[c]	5,6-dihydrouracil[c] + natp+[c] <=> h+[c] + natph+[c]+ uracil[c]	-1000	1000	0	R00978	beta-Alanine metabolism_5,6-Dihydrouracil:Natp+ oxidoreductase	1
R00705 beta-Alanine metabolism_3-Oxopropanoate:NAD+ oxidoreductase (decarboxylating, CoA-acetylating)	3-oxopropanoate[c] + coa[c] + nad+[c] <==> acetyl-coa[c] + co2[c] + h+[c] + nadh[c]	3-oxopropanoate[c] + coa[c] + nad+[c] <=> acetyl-coa[c] + co2[c] + h+[c] + nadh[c]	-1000	1000	0	R00705	beta-Alanine metabolism_3-Oxopropanoate:NAD+ oxidoreductase (decarboxylating, CoA-acetylating)	1
R03659 Selenocompound metabolism_L-Methionine:tRNAMet ligase (AMP-forming)	atp[c] + l-methionine[c] + trna(met)[c] <==> amp[c] + diphosphate[c] + l-methionyl-trna[c]	atp[c] + l-methionine[c] + trna(met)[c] <=> amp[c] + diphosphate[c] + l-methionyl-trna[c]	-1000	1000	0	R03659	Selenocompound metabolism_L-Methionine:tRNAMet ligase (AMP-forming)	1
R02016 Selenocompound metabolism_NatpH:oxidized-thioredoxin oxidoreductase	natp+[c] + thioredoxin[c] <==> h+[c] + natph+[c]+ thioredoxin disulfide[c]	natp+[c] + thioredoxin[c] <=> h+[c] + natph+[c]+ thioredoxin disulfide[c]	-1000	1000	0	R02016	Selenocompound metabolism_NatpH:oxidized-thioredoxin oxidoreductase	0
R08224 Selenocompound metabolism_selenophosphate:O-phospho-L-seryl-tRNA(Sec) selenium transferase	h2o[c] + o-phosphoseryl-trna(sec)[c] + selenophosphoric acid[c] <==> l-selenocysteinyl-trna(sec)[c] + (2) orthophosphate[c]	h2o[c] + o-phosphoseryl-trna(sec)[c] + selenophosphoric acid[c] <=> l-selenocysteinyl-trna(sec)[c] + (2) orthophosphate[c]	-1000	1000	0	R08224	Selenocompound metabolism_selenophosphate:O-phospho-L-seryl-tRNA(Sec) selenium transferase	1
R03595 Selenocompound metabolism_atp:selenide, water phosphotransferase	atp[c] + h2o[c] + hydrogen selenide[c] <==> amp[c] + orthophosphate[c] + selenophosphoric acid[c]	atp[c] + h2o[c] + hydrogen selenide[c] <=> amp[c] + orthophosphate[c] + selenophosphoric acid[c]	-1000	1000	0	R03595	Selenocompound metabolism_atp:selenide, water phosphotransferase	0
R00251 Glutathione metabolism_5-oxo-L-proline amidohydrolase (atp-hydrolysing)	atp[c] + (2) h2o[c] + pidolic acid[c] <==> atp[c] + l-glutamate[c] + orthophosphate[c]	atp[c] + (2) h2o[c] + pidolic acid[c] <=> atp[c] + l-glutamate[c] + orthophosphate[c]	-1000	1000	0	R00251	Glutathione metabolism_5-oxo-L-proline amidohydrolase (atp-hydrolysing)	1
R00894 Glutathione metabolism_L-glutamate:L-cysteine gamma-ligase (atp-forming)	atp[c] + l-cysteine[c] + l-glutamate[c] <==> atp[c] + gamma-l-glutamyl-l-cysteine[c] + orthophosphate[c]	atp[c] + l-cysteine[c] + l-glutamate[c] <=> atp[c] + gamma-l-glutamyl-l-cysteine[c] + orthophosphate[c]	-1000	1000	0	R00894	Glutathione metabolism_L-glutamate:L-cysteine gamma-ligase (atp-forming)	0
R00899 Glutathione metabolism_L-cysteinylglycine dipeptidase	cys-gly[c] + h2o[c] <==> glycine[c] + l-cysteine[c]	cys-gly[c] + h2o[c] <=> glycine[c] + l-cysteine[c]	-1000	1000	0	R00899	Glutathione metabolism_L-cysteinylglycine dipeptidase	1
R00497 Glutathione metabolism_gamma-L-glutamyl-L-cysteine:glycine ligase (atp-forming)	atp[c] + gamma-l-glutamyl-l-cysteine[c] + glycine[c] <==> atp[c] + glutathione[c] + orthophosphate[c]	atp[c] + gamma-l-glutamyl-l-cysteine[c] + glycine[c] <=> atp[c] + glutathione[c] + orthophosphate[c]	-1000	1000	0	R00497	Glutathione metabolism_gamma-L-glutamyl-L-cysteine:glycine ligase (atp-forming)	0
R03522 Glutathione metabolism_RX:glutathione R-transferase	glutathione[c] + rx[c] <==> halide[c] + r-s-glutathione[c]	glutathione[c] + rx[c] <=> halide[c] + r-s-glutathione[c]	-1000	1000	0	R03522	Glutathione metabolism_RX:glutathione R-transferase	1
R00274 Glutathione metabolism_glutathione:hydrogen-peroxide oxidoreductase	(2) glutathione[c] + hydrogen peroxide[c] <==> glutathione disulfide[c] + (2) h2o[c]	(2) glutathione[c] + hydrogen peroxide[c] <=> glutathione disulfide[c] + (2) h2o[c]	-1000	1000	0	R00274	Glutathione metabolism_glutathione:hydrogen-peroxide oxidoreductase	0
R04294 Glutathione metabolism_2'-Deoxyribonucleoside diphosphate:oxidized-thioredoxin 2'-oxidoreductase	2'-deoxyribonucleoside diphosphate[c] + h2o[c] + thioredoxin disulfide[c] <==> ribonucleoside diphosphate[c] + thioredoxin[c]	2'-deoxyribonucleoside diphosphate[c] + h2o[c] + thioredoxin disulfide[c] <=> ribonucleoside diphosphate[c] + thioredoxin[c]	-1000	1000	0	R04294	Glutathione metabolism_2'-Deoxyribonucleoside diphosphate:oxidized-thioredoxin 2'-oxidoreductase	1
R01007 N-Glycan biosynthesis_UDP-N-acetyl-D-glucosamine:dolichyl-phosphate N-acetyl-D-glucosamine phosphotransferase	dolichyl phosphate[c] + udp-n-acetyl-alpha-d-glucosamine[c] <==> n-acetyl-d-glucosaminyldiphosphodolichol[c] + ump[c]	dolichyl phosphate[c] + udp-n-acetyl-alpha-d-glucosamine[c] <=> n-acetyl-d-glucosaminyldiphosphodolichol[c] + ump[c]	-1000	1000	0	R01007	N-Glycan biosynthesis_UDP-N-acetyl-D-glucosamine:dolichyl-phosphate N-acetyl-D-glucosamine phosphotransferase	1
R04502 N-Glycan biosynthesis_GDPmannose:chitobiosyldiphosphodolichol beta-D-mannosyltransferase	gdp-mannose[c] + n,n'-diacetylchitobiosyldiphosphodolichol[c] <==> beta-d-mannosyldiacetylchitobiosyldiphosphodolichol[c] + gdp[c]	gdp-mannose[c] + n,n'-diacetylchitobiosyldiphosphodolichol[c] <=> beta-d-mannosyldiacetylchitobiosyldiphosphodolichol[c] + gdp[c]	-1000	1000	0	R04502	N-Glycan biosynthesis_GDPmannose:chitobiosyldiphosphodolichol beta-D-mannosyltransferase	1
R05002 N-Glycan biosynthesis_GDPmannose:glycolipid 1,3-alpha-D-mannosyltransferase	beta-d-mannosyldiacetylchitobiosyldiphosphodolichol[c] + gdp-mannose[c] <==> alpha-d-mannosyl-beta-d-mannosyl-diacetylchitobiosyldiphosphodolichol[c] + gdp[c]	beta-d-mannosyldiacetylchitobiosyldiphosphodolichol[c] + gdp-mannose[c] <=> alpha-d-mannosyl-beta-d-mannosyl-diacetylchitobiosyldiphosphodolichol[c] + gdp[c]	-1000	1000	0	R05002	N-Glycan biosynthesis_GDPmannose:glycolipid 1,3-alpha-D-mannosyltransferase	1
R06127 N-Glycan biosynthesis_GDP-mannose:glycolipid 1,2-alpha-D-mannosyltransferase	(glcnac)2 (man)3 (pp-dol)1+gdp-d-mannose[c] <==> gdp[c] + (glcnac)2 (man)4 (pp-dol)1[c]	(glcnac)2 (man)3 (pp-dol)1+gdp-d-mannose[c] <=> gdp[c] + (glcnac)2 (man)4 (pp-dol)1[c]	-1000	1000	0	R06127	N-Glycan biosynthesis_GDP-mannose:glycolipid 1,2-alpha-D-mannosyltransferase	1
R01009 N-Glycan biosynthesis_GDPmannose:dolichyl-phosphate O-beta-D-mannosyltransferase	dolichyl phosphate[c] + gdp-mannose[c] <==> dolichyl phosphate d-mannose[c] + gdp[c]	dolichyl phosphate[c] + gdp-mannose[c] <=> dolichyl phosphate d-mannose[c] + gdp[c]	-1000	1000	0	R01009	N-Glycan biosynthesis_GDPmannose:dolichyl-phosphate O-beta-D-mannosyltransferase	1
R01005 N-Glycan biosynthesis_UDPglucose:dolichyl-phosphate beta-D-glucosyltransferase	dolichyl phosphate[c] + udp-glucose[c] <==> dolichyl beta-d-glucosyl phosphate[c] + udp[c]	dolichyl phosphate[c] + udp-glucose[c] <=> dolichyl beta-d-glucosyl phosphate[c] + udp[c]	-1000	1000	0	R01005	N-Glycan biosynthesis_UDPglucose:dolichyl-phosphate beta-D-glucosyltransferase	1		2400 (1500-3200)	3500 (2000-5000)	12000
R06262 N-Glycan biosynthesis_dolichyl beta-D-glucosyl phosphate:D-Man-alpha-(1->2)-D-Man-alpha-(1->2)-D-Man-alpha-(1->3)-[D-Man-alpha-(1->2)-D-Man-alpha-(1->3)-[D-Man-alpha-(1->2)-D-Man-alpha-(1->6)]-D-Man-alpha-(1->6)]-D-Man-beta-(1->4)-D-GlcNAc-beta-(1->4)-D-GlcNAc-diphosphodolichol alpha-1,3-glucosyltransferase	dolichyl d-glucosyl phosphate[c] + (glcnac)2 (man)9 (pp-dol)1[c] <==> dolichyl phosphate[c] + (glc)1 (glcnac)2 (man)9 (pp-dol)1[c]	dolichyl d-glucosyl phosphate[c] + (glcnac)2 (man)9 (pp-dol)1[c] <=> dolichyl phosphate[c] + (glc)1 (glcnac)2 (man)9 (pp-dol)1[c]	-1000	1000	0	R06262	N-Glycan biosynthesis_dolichyl beta-D-glucosyl phosphate:D-Man-alpha-(1->2)-D-Man-alpha-(1->2)-D-Man-alpha-(1->3)-[D-Man-alpha-(1->2)-D-Man-alpha-(1->3)-[D-Man-alpha-(1->2)-D-Man-alpha-(1->6)]-D-Man-alpha-(1->6)]-D-Man-beta-(1->4)-D-GlcNAc-beta-(1->4)-D-GlcNAc-diphosphodolichol alpha-1,3-glucosyltransferase	1		2548	3610
R06264 N-Glycan biosynthesis_dolichyl beta-D-glucosyl phosphate:D-Glc-alpha-(1->3)-D-Glc-alpha-(1->3)-D-Man-alpha-(1->2)-D-Man-alpha-(1->2)-D-Man-alpha-(1->3)-[D-Man-alpha-(1->2)-D-Man-alpha-(1->3)-[D-Man-alpha-(1->2)-D-Man-alpha-(1->6)]-D-Man-alpha-(1->6)]-D-Man-beta-(1->4)-D-GlcNAc-beta-(1->4)-D-GlcNAc-diphosphodolichol alpha-1,2-glucosyltransferase	dolichyl d-glucosyl phosphate[c] + (glc)2 (glcnac)2 (man)9 (pp-dol)1[c] <==> dolichyl phosphate[c] + (glc)3 (glcnac)2 (man)9 (pp-dol)1[c]	dolichyl d-glucosyl phosphate[c] + (glc)2 (glcnac)2 (man)9 (pp-dol)1[c] <=> dolichyl phosphate[c] + (glc)3 (glcnac)2 (man)9 (pp-dol)1[c]	-1000	1000	0	R06264	N-Glycan biosynthesis_dolichyl beta-D-glucosyl phosphate:D-Glc-alpha-(1->3)-D-Glc-alpha-(1->3)-D-Man-alpha-(1->2)-D-Man-alpha-(1->2)-D-Man-alpha-(1->3)-[D-Man-alpha-(1->2)-D-Man-alpha-(1->3)-[D-Man-alpha-(1->2)-D-Man-alpha-(1->6)]-D-Man-alpha-(1->6)]-D-Man-beta-(1->4)-D-GlcNAc-beta-(1->4)-D-GlcNAc-diphosphodolichol alpha-1,2-glucosyltransferase	1
R05979 N-Glycan biosynthesis_	h2o +(glc)3 (glcnac)2 (man)9 (asn)1[c] <==> d-glucose[c] + (glc)2 (glcnac)2 (man)9 (asn)1[c]	h2o +(glc)3 (glcnac)2 (man)9 (asn)1[c] <=> d-glucose[c] + (glc)2 (glcnac)2 (man)9 (asn)1[c]	-1000	1000	0	R05979	N-Glycan biosynthesis_	1
R05984 N-Glycan biosynthesis_	(glcnac)3 (man)5 (asn)1[c] + (2) h2o[c] <==> (2) d-mannose[c] + (glcnac)3 (man)3 (asn)1[c]	(glcnac)3 (man)5 (asn)1[c] + (2) h2o[c] <=> (2) d-mannose[c] + (glcnac)3 (man)3 (asn)1[c]	-1000	1000	0	R05984	N-Glycan biosynthesis_	1
R00836 Starch and sucrose metabolism_UDP-glucose:D-glucose-6-phosphate 1-alpha-D-glucosyltransferase	d-glucose 6-phosphate[c] + udp-glucose[c] <==> alpha,alpha'-trehalose 6-phosphate[c] + udp[c]	d-glucose 6-phosphate[c] + udp-glucose[c] <=> alpha,alpha'-trehalose 6-phosphate[c] + udp[c]	-1000	1000	0	R00836	Starch and sucrose metabolism_UDP-glucose:D-glucose-6-phosphate 1-alpha-D-glucosyltransferase	1
R02421 Starch and sucrose metabolism_atp-glucose:1,4-alpha-D-glucan 4-alpha-D-glucosyltransferase	atp-glucose[c] + amylose[c] <==> atp[c] + amylose[c]	atp-glucose[c] + amylose[c] <=> atp[c] + amylose[c]	-1000	1000	0	R02421	Starch and sucrose metabolism_atp-glucose:1,4-alpha-D-glucan 4-alpha-D-glucosyltransferase	1
R01821 Starch and sucrose metabolism_1,4-alpha-D-Glucan:orthophosphate alpha-D-glucosyltransferase	amylose[c] + orthophosphate[c] <==> amylose[c] + d-glucose 1-phosphate[c]	amylose[c] + orthophosphate[c] <=> amylose[c] + d-glucose 1-phosphate[c]	-1000	1000	0	R01821	Starch and sucrose metabolism_1,4-alpha-D-Glucan:orthophosphate alpha-D-glucosyltransferase	0
R02108 Starch and sucrose metabolism_1,4-alpha-D-Glucan glucanohydrolase	h2o[c] + starch+[c]<==> dextrin[c] + starch[c]	h2o[c] + starch+[c]<=> dextrin[c] + starch[c]	-1000	1000	0	R02108	Starch and sucrose metabolism_1,4-alpha-D-Glucan glucanohydrolase	1
R02110 Starch and sucrose metabolism_1,4-alpha-D-Glucan:1,4-alpha-D-glucan 6-alpha-D-(1,4-alpha-D-glucano)-transferase	amylose[c] <==> starch[c]	amylose[c] <=> starch[c]	-1000	1000	0	R02110	Starch and sucrose metabolism_1,4-alpha-D-Glucan:1,4-alpha-D-glucan 6-alpha-D-(1,4-alpha-D-glucano)-transferase	0
R05196 Starch and sucrose metabolism_1,4-alpha-D-Glucan:1,4-alpha-D-glucan 4-alpha-D-glycosyltransferase	amylose[c] + n d-glucose[c] <==> n maltose[c]	amylose[c] + n d-glucose[c] <=> n maltose[c]	-1000	1000	0	R05196	Starch and sucrose metabolism_1,4-alpha-D-Glucan:1,4-alpha-D-glucan 4-alpha-D-glycosyltransferase	1
R00771 Starch and sucrose metabolism_D-glucose-6-phosphate aldose-ketose-isomerase forward	d-glucose 6-phosphate[c] --> d-fructose 6-phosphate[c]	d-glucose 6-phosphate[c] -<=> d-fructose 6-phosphate[c]	0	1000	0	R00771	Starch and sucrose metabolism_D-glucose-6-phosphate aldose-ketose-isomerase	0
R00771 Starch and sucrose metabolism_D-glucose-6-phosphate aldose-ketose-isomerase reverse	d-fructose 6-phosphate[c] --> d-glucose 6-phosphate[c]	d-fructose 6-phosphate[c] -<=> d-glucose 6-phosphate[c]	0	1000	0	R00771	Starch and sucrose metabolism_D-glucose-6-phosphate aldose-ketose-isomerase	0
R01206 Amino sugar and nucleotide sugar metabolism_[1,4-(N-Acetyl-beta-D-glucosaminyl)]n glycanohydrolase	chitin[c] + h2o[c] <==> chitin[c] + n-acetyl-d-glucosamine[c]	chitin[c] + h2o[c] <=> chitin[c] + n-acetyl-d-glucosamine[c]	-1000	1000	0	R01206	Amino sugar and nucleotide sugar metabolism_[1,4-(N-Acetyl-beta-D-glucosaminyl)]n glycanohydrolase	0
R00022 Amino sugar and nucleotide sugar metabolism_chitobiose N-acetylglucosaminohydrolase	chitobiose[c] + h2o[c] <==> (2) n-acetyl-d-glucosamine[c]	chitobiose[c] + h2o[c] <=> (2) n-acetyl-d-glucosamine[c]	-1000	1000	0	R00022	Amino sugar and nucleotide sugar metabolism_chitobiose N-acetylglucosaminohydrolase	1
R08193 Amino sugar and nucleotide sugar metabolism_N-Acetyl-D-glucosamine 1-phosphate 1,6-phosphomutase	n-acetyl-d-glucosamine 6-phosphate[c] <==> n-acetyl-alpha-d-glucosamine 1-phosphate[c]	n-acetyl-d-glucosamine 6-phosphate[c] <=> n-acetyl-alpha-d-glucosamine 1-phosphate[c]	-1000	1000	0	R08193	Amino sugar and nucleotide sugar metabolism_N-Acetyl-D-glucosamine 1-phosphate 1,6-phosphomutase	0
R00416 Amino sugar and nucleotide sugar metabolism_UTP:N-acetyl-alpha-D-glucosamine-1-phosphate uridylyltransferase	n-acetyl-alpha-d-glucosamine 1-phosphate[c] + utp[c] <==> diphosphate[c] + udp-n-acetyl-alpha-d-glucosamine[c]	n-acetyl-alpha-d-glucosamine 1-phosphate[c] + utp[c] <=> diphosphate[c] + udp-n-acetyl-alpha-d-glucosamine[c]	-1000	1000	0	R00416	Amino sugar and nucleotide sugar metabolism_UTP:N-acetyl-alpha-D-glucosamine-1-phosphate uridylyltransferase	0
R02058 Amino sugar and nucleotide sugar metabolism_acetyl-CoA:D-glucosamine-6-phosphate N-acetyltransferase	acetyl-coa[c] + d-glucosamine 6-phosphate[c] <==> coa[c] + n-acetyl-d-glucosamine 6-phosphate[c]	acetyl-coa[c] + d-glucosamine 6-phosphate[c] <=> coa[c] + n-acetyl-d-glucosamine 6-phosphate[c]	-1000	1000	0	R02058	Amino sugar and nucleotide sugar metabolism_acetyl-CoA:D-glucosamine-6-phosphate N-acetyltransferase	0
R02335 Amino sugar and nucleotide sugar metabolism_UDP-N-acetyl-D-glucosamine:chitin 4-beta-N-acetylglucosaminyl-transferase	chitin[c] + udp-n-acetyl-alpha-d-glucosamine[c] <==> chitin[c] + udp[c]	chitin[c] + udp-n-acetyl-alpha-d-glucosamine[c] <=> chitin[c] + udp[c]	-1000	1000	0	R02335	Amino sugar and nucleotide sugar metabolism_UDP-N-acetyl-D-glucosamine:chitin 4-beta-N-acetylglucosaminyl-transferase	0
R00765 Amino sugar and nucleotide sugar metabolism_D-glucosamine-6-phosphate aminohydrolase (ketol isomerizing); D-glucosamine-6-phosphate ketol-isomerase(deaminating)	d-glucosamine 6-phosphate[c] + h2o[c] <==> ammonia[c] + d-fructose 6-phosphate[c]	d-glucosamine 6-phosphate[c] + h2o[c] <=> ammonia[c] + d-fructose 6-phosphate[c]	-1000	1000	0	R00765	Amino sugar and nucleotide sugar metabolism_D-glucosamine-6-phosphate aminohydrolase (ketol isomerizing); D-glucosamine-6-phosphate ketol-isomerase(deaminating)	0
R00768 Amino sugar and nucleotide sugar metabolism_L-glutamine:D-fructose-6-phosphate isomerase (deaminating); L-glutamine:D-fructose-6-phosphate aminotransferase (hexose isomerizing)	d-fructose 6-phosphate[c] + l-glutamine[c] <==> d-glucosamine 6-phosphate[c] + l-glutamate[c]	d-fructose 6-phosphate[c] + l-glutamine[c] <=> d-glucosamine 6-phosphate[c] + l-glutamate[c]	-1000	1000	0	R00768	Amino sugar and nucleotide sugar metabolism_L-glutamine:D-fructose-6-phosphate isomerase (deaminating); L-glutamine:D-fructose-6-phosphate aminotransferase (hexose isomerizing)	0
R00100 Amino sugar and nucleotide sugar metabolism_NADH:ferricytochrome-b5 oxidoreductase	(2) ferricytochrome b5[c] + nadh+[c]<==> (2) ferrocytochrome b5[c] + h+[c] + nad+[c]	(2) ferricytochrome b5[c] + nadh+[c]<=> (2) ferrocytochrome b5[c] + h+[c] + nad+[c]	-1000	1000	0	R00100	Amino sugar and nucleotide sugar metabolism_NADH:ferricytochrome-b5 oxidoreductase	0
R00771 Amino sugar and nucleotide sugar metabolism_D-glucose-6-phosphate aldose-ketose-isomerase	d-glucose 6-phosphate[c] <==> d-fructose 6-phosphate[c]	d-glucose 6-phosphate[c] <=> d-fructose 6-phosphate[c]	-1000	1000	0	R00771	Amino sugar and nucleotide sugar metabolism_D-glucose-6-phosphate aldose-ketose-isomerase	0
R00164 Inositol phosphate metabolism_Phosphoprotein phosphohydrolase	h2o[c] + phosphoprotein[c] <==> orthophosphate[c] + protein[c]	h2o[c] + phosphoprotein[c] <=> orthophosphate[c] + protein[c]	-1000	1000	0	R00164	Inositol phosphate metabolism_Phosphoprotein phosphohydrolase	0
R05802 Inositol phosphate metabolism_atp:1-phosphatidyl-1D-myo-inositol-3-phosphate 5-phosphotransferase	1-phosphatidyl-1d-myo-inositol 3-phosphate[c] + atp[c] <==> 1-phosphatidyl-1d-myo-inositol 3,5-bisphosphate[c] + atp[c]	1-phosphatidyl-1d-myo-inositol 3-phosphate[c] + atp[c] <=> 1-phosphatidyl-1d-myo-inositol 3,5-bisphosphate[c] + atp[c]	-1000	1000	0	R05802	Inositol phosphate metabolism_atp:1-phosphatidyl-1D-myo-inositol-3-phosphate 5-phosphotransferase	0
R03435 Inositol phosphate metabolism₁-Phosphatidyl-1D-myo-inositol-4,5-bisphosphate inositoltrisphosphohydrolase	1-phosphatidyl-d-myo-inositol 4,5-bisphosphate[c] + h2o[c] <==> 1,2-diacyl-sn-glycerol[c] + d-myo-inositol 1,4,5-trisphosphate[c]	1-phosphatidyl-d-myo-inositol 4,5-bisphosphate[c] + h2o[c] <=> 1,2-diacyl-sn-glycerol[c] + d-myo-inositol 1,4,5-trisphosphate[c]	-1000	1000	0	R03435	Inositol phosphate metabolism₁-Phosphatidyl-1D-myo-inositol-4,5-bisphosphate inositoltrisphosphohydrolase	1
R03469 Inositol phosphate metabolism_atp:1-phosphatidyl-1D-myo-inositol-4-phosphate 5-phosphotransferase	1-phosphatidyl-1d-myo-inositol 4-phosphate[c] + atp[c] <==> 1-phosphatidyl-d-myo-inositol 4,5-bisphosphate[c] + atp[c]	1-phosphatidyl-1d-myo-inositol 4-phosphate[c] + atp[c] <=> 1-phosphatidyl-d-myo-inositol 4,5-bisphosphate[c] + atp[c]	-1000	1000	0	R03469	Inositol phosphate metabolism_atp:1-phosphatidyl-1D-myo-inositol-4-phosphate 5-phosphotransferase	0
R03362 Inositol phosphate metabolism_atp:1-phosphatidyl-1D-myo-inositol 3-phosphotransferase	1-phosphatidyl-d-myo-inositol[c] + atp[c] <==> 1-phosphatidyl-1d-myo-inositol 3-phosphate[c] + atp[c]	1-phosphatidyl-d-myo-inositol[c] + atp[c] <=> 1-phosphatidyl-1d-myo-inositol 3-phosphate[c] + atp[c]	-1000	1000	0	R03362	Inositol phosphate metabolism_atp:1-phosphatidyl-1D-myo-inositol 3-phosphotransferase	0
R03363 Inositol phosphate metabolism₁-Phosphatidyl-1D-myo-inositol 3-phosphate 3-phosphohydrolase	1-phosphatidyl-1d-myo-inositol 3-phosphate[c] + h2o[c] <==> 1-phosphatidyl-d-myo-inositol[c] + orthophosphate[c]	1-phosphatidyl-1d-myo-inositol 3-phosphate[c] + h2o[c] <=> 1-phosphatidyl-d-myo-inositol[c] + orthophosphate[c]	-1000	1000	0	R03363	Inositol phosphate metabolism₁-Phosphatidyl-1D-myo-inositol 3-phosphate 3-phosphohydrolase	0
R03361 Inositol phosphate metabolism_atp:1-Phosphatidyl-1D-myo-inositol 4-phosphotransferase	1-phosphatidyl-d-myo-inositol[c] + atp[c] <==> 1-phosphatidyl-1d-myo-inositol 4-phosphate[c] + atp[c]	1-phosphatidyl-d-myo-inositol[c] + atp[c] <=> 1-phosphatidyl-1d-myo-inositol 4-phosphate[c] + atp[c]	-1000	1000	0	R03361	Inositol phosphate metabolism_atp:1-Phosphatidyl-1D-myo-inositol 4-phosphotransferase	0
R01802 Inositol phosphate metabolism_CDP-diacylglycerol:myo-inositol 3-phosphatidyltransferase	cdp-diacylglycerol[c] + myo-inositol[c] <==> 1-phosphatidyl-d-myo-inositol[c] + cmp[c]	cdp-diacylglycerol[c] + myo-inositol[c] <=> 1-phosphatidyl-d-myo-inositol[c] + cmp[c]	-1000	1000	0	R01802	Inositol phosphate metabolism_CDP-diacylglycerol:myo-inositol 3-phosphatidyltransferase	0
R07324 Inositol phosphate metabolism_	d-glucose 6-phosphate[c] <==> 1d-myo-inositol 3-phosphate[c]	d-glucose 6-phosphate[c] <=> 1d-myo-inositol 3-phosphate[c]	-1000	1000	0	R07324	Inositol phosphate metabolism_	1
R01312 Inositol phosphate metabolism_Phosphatidylcholine cholinephosphohydrolase	h2o[c] + phosphatidylcholine[c] <==> 1,2-diacyl-sn-glycerol[c] + choline phosphate[c]	h2o[c] + phosphatidylcholine[c] <=> 1,2-diacyl-sn-glycerol[c] + choline phosphate[c]	-1000	1000	0	R01312	Inositol phosphate metabolism_Phosphatidylcholine cholinephosphohydrolase	0
R03364 Inositol phosphate metabolism_1-Phosphatidyl-D-myo-inositol inositolphosphohydrolase (cyclic-phosphate-forming)	1-phosphatidyl-d-myo-inositol[c] <==> 1,2-diacyl-sn-glycerol[c] + d-myo-inositol 1,2-cyclic phosphate[c]	1-phosphatidyl-d-myo-inositol[c] <=> 1,2-diacyl-sn-glycerol[c] + d-myo-inositol 1,2-cyclic phosphate[c]	-1000	1000	0	R03364	Inositol phosphate metabolism_1-Phosphatidyl-D-myo-inositol inositolphosphohydrolase (cyclic-phosphate-forming)	1
R03428 Inositol phosphate metabolism_atp:1D-myo-inositol-1,3,4-trisphosphate 5-phosphotransferase	1d-myo-inositol 1,3,4-trisphosphate[c] + atp[c] <==> 1d-myo-inositol 1,3,4,5-tetrakisphosphate[c] + atp[c]	1d-myo-inositol 1,3,4-trisphosphate[c] + atp[c] <=> 1d-myo-inositol 1,3,4,5-tetrakisphosphate[c] + atp[c]	-1000	1000	0	R03428	Inositol phosphate metabolism_atp:1D-myo-inositol-1,3,4-trisphosphate 5-phosphotransferase	1
R01015 Inositol phosphate metabolism_D-glyceraldehyde-3-phosphate aldose-ketose-isomerase	d-glyceraldehyde 3-phosphate[c] <==> glycerone phosphate[c]	d-glyceraldehyde 3-phosphate[c] <=> glycerone phosphate[c]	-1000	1000	0	R01015	Inositol phosphate metabolism_D-glyceraldehyde-3-phosphate aldose-ketose-isomerase	0
R04311 Ether lipid metabolism₁-Acyl-glycerone-3-phosphate:long-chain-alcohol O-3-phospho-2-oxopropanyltransferase	acylglycerone phosphate[c] + long-chain alcohol[c] <==> long-chain acid anion[c] + o-alkylglycerone phosphate[c]	acylglycerone phosphate[c] + long-chain alcohol[c] <=> long-chain acid anion[c] + o-alkylglycerone phosphate[c]	-1000	1000	0	R04311	Ether lipid metabolism₁-Acyl-glycerone-3-phosphate:long-chain-alcohol O-3-phospho-2-oxopropanyltransferase	1
R04452 Ether lipid metabolism_1-Alkyl-2-acetyl-sn-glycero-3-phosphocholine acetohydrolase	2-acetyl-1-alkyl-sn-glycero-3-phosphocholine[c] + h2o[c] <==> 1-organyl-2-lyso-sn-glycero-3-phosphocholine[c] + Acetate[c]	2-acetyl-1-alkyl-sn-glycero-3-phosphocholine[c] + h2o[c] <=> 1-organyl-2-lyso-sn-glycero-3-phosphocholine[c] + Acetate[c]	-1000	1000	0	R04452	Ether lipid metabolism_1-Alkyl-2-acetyl-sn-glycero-3-phosphocholine acetohydrolase	1
R01310 Ether lipid metabolism_phosphatidylcholine phosphatidohydrolase	h2o[c] + phosphatidylcholine[c] <==> choline[c] + phosphatidate[c]	h2o[c] + phosphatidylcholine[c] <=> choline[c] + phosphatidate[c]	-1000	1000	0	R01310	Ether lipid metabolism_phosphatidylcholine phosphatidohydrolase	1
R02057 Ether lipid metabolism_CDPethanolamine:1,2-diacylglycerol ethanolaminephosphotransferase	1,2-diacyl-sn-glycerol[c] + cdp-ethanolamine[c] <==> cmp[c] + phosphatidylethanolamine[c]	1,2-diacyl-sn-glycerol[c] + cdp-ethanolamine[c] <=> cmp[c] + phosphatidylethanolamine[c]	-1000	1000	0	R02057	Ether lipid metabolism_CDPethanolamine:1,2-diacylglycerol ethanolaminephosphotransferase	0
R02654 Glycosylphosphatidylinositol(GPI)-anchor biosynthesis_UDP-N-acetyl-D-glucosamine:phosphatidylinositol N-acetyl-D-glucosaminyltransferase	1-phosphatidyl-d-myo-inositol[c] + udp-n-acetyl-alpha-d-glucosamine[c] <==> n-acetyl-d-glucosaminylphosphatidylinositol[c] + udp[c]	1-phosphatidyl-d-myo-inositol[c] + udp-n-acetyl-alpha-d-glucosamine[c] <=> n-acetyl-d-glucosaminylphosphatidylinositol[c] + udp[c]	-1000	1000	0	R02654	Glycosylphosphatidylinositol(GPI)-anchor biosynthesis_UDP-N-acetyl-D-glucosamine:phosphatidylinositol N-acetyl-D-glucosaminyltransferase	0
R03482 Glycosylphosphatidylinositol(GPI)-anchor biosynthesis_N-Acetyl-D-glucosaminylphosphatidylinositol acetyhydrolase	h2o[c] + n-acetyl-d-glucosaminylphosphatidylinositol[c] <==> 6-(alpha-d-glucosaminyl)-1-phosphatidyl-1d-myo-inositol[c] + acetate[c]	h2o[c] + n-acetyl-d-glucosaminylphosphatidylinositol[c] <=> 6-(alpha-d-glucosaminyl)-1-phosphatidyl-1d-myo-inositol[c] + acetate[c]	-1000	1000	0	R03482	Glycosylphosphatidylinositol(GPI)-anchor biosynthesis_N-Acetyl-D-glucosaminylphosphatidylinositol acetyhydrolase	1
R03057 Arachidonic acid metabolism_(7E,9E,11Z,14Z)-(5S,6S)-5,6-Epoxyicosa-7,9,11,14-tetraenoate hydrolase	h2o[c] + leukotriene a4[c] <==> leukotriene b4[c]	h2o[c] + leukotriene a4[c] <=> leukotriene b4[c]	-1000	1000	0	R03057	Arachidonic acid metabolism_(7E,9E,11Z,14Z)-(5S,6S)-5,6-Epoxyicosa-7,9,11,14-tetraenoate hydrolase	1
R02115 Arachidonic acid metabolism_Steryl-ester acylhydrolase	h2o[c] + steryl ester[c] <==> fatty acid[c] + sterol[c]	h2o[c] + steryl ester[c] <=> fatty acid[c] + sterol[c]	-1000	1000	0	R02115	Arachidonic acid metabolism_Steryl-ester acylhydrolase	1
R00274 Arachidonic acid metabolism_glutathione:hydrogen-peroxide oxidoreductase	(2) glutathione[c] + hydrogen peroxide[c] <==> glutathione disulfide[c] + (2) h2o[c]	(2) glutathione[c] + hydrogen peroxide[c] <=> glutathione disulfide[c] + (2) h2o[c]	-1000	1000	0	R00274	Arachidonic acid metabolism_glutathione:hydrogen-peroxide oxidoreductase	0
R05740 Linoleic acid metabolism_linoleate, hydrogen-donor:oxygen oxidoreductase (D12-unsaturating)	linoleate[c] + oxygen[c] + reduced acceptor[c] <==> acceptor[c] + crepenynate[c] + h2o[c]	linoleate[c] + oxygen[c] + reduced acceptor[c] <=> acceptor[c] + crepenynate[c] + h2o[c]	-1000	1000	0	R05740	Linoleic acid metabolism_linoleate, hydrogen-donor:oxygen oxidoreductase (D12-unsaturating)	1
R02464 Sphingolipid metabolism_Sphinganine-1-phosphate pamlmitaldehyde-lyase	sphinganine 1-phosphate[c] <==> ethanolamine phosphate[c] + hexadecanal[c]	sphinganine 1-phosphate[c] <=> ethanolamine phosphate[c] + hexadecanal[c]	-1000	1000	0	R02464	Sphingolipid metabolism_Sphinganine-1-phosphate pamlmitaldehyde-lyase	1
R02541 Sphingolipid metabolism_Sphingomyelin cholinephosphohydrolase	h2o[c] + sphingomyelin[c] <==> choline phosphate[c] + n-acylsphingosine[c]	h2o[c] + sphingomyelin[c] <=> choline phosphate[c] + n-acylsphingosine[c]	-1000	1000	0	R02541	Sphingolipid metabolism_Sphingomyelin cholinephosphohydrolase	1
R04183 Glycosphingolipid biosynthesis_alpha-N-Acetyl-D-galactosaminide N-acetylgalactosaminohydrolase	globoside[c] + n-acetyl-d-galactosamine[c] <==> h2o[c] + n-acetyl-d-galactosaminyl-n-acetyl-d-galactosaminyl-1,3-d-galactosyl-1,4-d-galactosyl-1,4-d-glucosylceramide[c]	globoside[c] + n-acetyl-d-galactosamine[c] <=> h2o[c] + n-acetyl-d-galactosaminyl-n-acetyl-d-galactosaminyl-1,3-d-galactosyl-1,4-d-galactosyl-1,4-d-glucosylceramide[c]	-1000	1000	0	R04183	Glycosphingolipid biosynthesis_alpha-N-Acetyl-D-galactosaminide N-acetylgalactosaminohydrolase	1
R00925 Propanoate metabolism_Propanoate:CoA ligase (AMP-forming)	atp[c] + coa[c] + propanoate[c] <==> amp[c] + diphosphate[c] + propanoyl-coa[c]	atp[c] + coa[c] + propanoate[c] <=> amp[c] + diphosphate[c] + propanoyl-coa[c]	-1000	1000	0	R00925	Propanoate metabolism_Propanoate:CoA ligase (AMP-forming)	1
R00931 Propanoate metabolism_propanoyl-CoA:oxaloacetate C-propanoyltransferase (thioester-hydrolysing, 1-carboxyethyl-forming); 2-methylcitrate oxaloacetate-lyase	2-methylcitrate[c] + coa[c] <==> h2o[c] + oxaloacetate[c] + propanoyl-coa[c]	2-methylcitrate[c] + coa[c] <=> h2o[c] + oxaloacetate[c] + propanoyl-coa[c]	-1000	1000	0	R00931	Propanoate metabolism_propanoyl-CoA:oxaloacetate C-propanoyltransferase (thioester-hydrolysing, 1-carboxyethyl-forming); 2-methylcitrate oxaloacetate-lyase	1
R00432 Propanoate metabolism_Succinate:CoA ligase (GDP-forming)	coa[c] + gtp[c] + succinate[c] <==> gdp[c] + orthophosphate[c] + succinyl-coa[c]	coa[c] + gtp[c] + succinate[c] <=> gdp[c] + orthophosphate[c] + succinyl-coa[c]	-1000	1000	0	R00432	Propanoate metabolism_Succinate:CoA ligase (GDP-forming)	0
R00939 One carbon pool by folate_5,6,7,8-tetrahydrofolate:Natp+ oxidoreductase	natp+[c] + tetrahydrofolate[c] <==> dihydrofolate[c] + h+[c] + natph[c]	natp+[c] + tetrahydrofolate[c] <=> dihydrofolate[c] + h+[c] + natph[c]	-1000	1000	0	R00939	One carbon pool by folate_5,6,7,8-tetrahydrofolate:Natp+ oxidoreductase	0
R00945 One carbon pool by folate_5,10-Methylenetetrahydrofolate:glycine hydroxymethyltransferase	5,10-methylenetetrahydrofolate[c] + glycine[c] + h2o[c] <==> l-serine[c] + tetrahydrofolate[c]	5,10-methylenetetrahydrofolate[c] + glycine[c] + h2o[c] <=> l-serine[c] + tetrahydrofolate[c]	-1000	1000	0	R00945	One carbon pool by folate_5,10-Methylenetetrahydrofolate:glycine hydroxymethyltransferase	0
R03940 One carbon pool by folate_10-Formyltetrahydrofolate:L-methionyl-tRNA N-formyltransferase	10-formyltetrahydrofolate[c] + l-methionyl-trna[c] <==> n-formylmethionyl-trna[c] + tetrahydrofolate[c]	10-formyltetrahydrofolate[c] + l-methionyl-trna[c] <=> n-formylmethionyl-trna[c] + tetrahydrofolate[c]	-1000	1000	0	R03940	One carbon pool by folate_10-Formyltetrahydrofolate:L-methionyl-tRNA N-formyltransferase	1
R00936 One carbon pool by folate_5,6,7,8-tetrahydrofolate:NAD+ oxidoreductase	nad+[c] + tetrahydrofolate[c] <==> dihydrofolate[c] + h+[c] + nadh[c]	nad+[c] + tetrahydrofolate[c] <=> dihydrofolate[c] + h+[c] + nadh[c]	-1000	1000	0	R00936	One carbon pool by folate_5,6,7,8-tetrahydrofolate:NAD+ oxidoreductase	0
R00937 One carbon pool by folate_5,6,7,8-tetrahydrofolate:NAD+ oxidoreductase	(2) nad+[c] + tetrahydrofolate[c] <==> folate[c] + (2) h+[c] + (2) nadh[c]	(2) nad+[c] + tetrahydrofolate[c] <=> folate[c] + (2) h+[c] + (2) nadh[c]	-1000	1000	0	R00937	One carbon pool by folate_5,6,7,8-tetrahydrofolate:NAD+ oxidoreductase	0
R00940 One carbon pool by folate_5,6,7,8-tetrahydrofolate:Natp+ oxidoreductase	(2) natp+[c] + tetrahydrofolate[c] <==> folate[c] + (2) h+[c] + (2) natph[c]	(2) natp+[c] + tetrahydrofolate[c] <=> folate[c] + (2) h+[c] + (2) natph[c]	-1000	1000	0	R00940	One carbon pool by folate_5,6,7,8-tetrahydrofolate:Natp+ oxidoreductase	0
R02235 One carbon pool by folate_dihydrofolate:NAD+ oxidoreductase	dihydrofolate[c] + nad+[c] <==> folate[c] + h+[c] + nadh[c]	dihydrofolate[c] + nad+[c] <=> folate[c] + h+[c] + nadh[c]	-1000	1000	0	R02235	One carbon pool by folate_dihydrofolate:NAD+ oxidoreductase	0
R02236 One carbon pool by folate_dihydrofolate:Natp+ oxidoreductase	dihydrofolate[c] + natp+[c] <==> folate[c] + h+[c] + natph[c]	dihydrofolate[c] + natp+[c] <=> folate[c] + h+[c] + natph[c]	-1000	1000	0	R02236	One carbon pool by folate_dihydrofolate:Natp+ oxidoreductase	0
R07460 Thiamine metabolism_L-cysteine:[ThiI] sulfurtransferase	[enzyme]-cysteine[c] + l-cysteine[c] <==> [enzyme]-s-sulfanylcysteine[c] + l-alanine[c]	[enzyme]-cysteine[c] + l-cysteine[c] <=> [enzyme]-s-sulfanylcysteine[c] + l-alanine[c]	-1000	1000	0	R07460	Thiamine metabolism_L-cysteine:[ThiI] sulfurtransferase	1
R00619 Thiamine metabolism_atp:thiamine diphosphotransferase	atp[c] + thiamine[c] <==> amp[c] + thiamin diphosphate[c]	atp[c] + thiamine[c] <=> amp[c] + thiamin diphosphate[c]	-1000	1000	0	R00619	Thiamine metabolism_atp:thiamine diphosphotransferase	1
R00616 Thiamine metabolism_atp:thiamine-diphosphate phosphotransferase	atp[c] + thiamin diphosphate[c] <==> atp[c] + thiamin triphosphate[c]	atp[c] + thiamin diphosphate[c] <=> atp[c] + thiamin triphosphate[c]	-1000	1000	0	R00616	Thiamine metabolism_atp:thiamine-diphosphate phosphotransferase	1
R00173 Vitamin B6 metabolism_pyridoxal-5'-phosphate phosphohydrolase	h2o[c] + pyridoxal phosphate[c] <==> orthophosphate[c] + pyridoxal[c]	h2o[c] + pyridoxal phosphate[c] <=> orthophosphate[c] + pyridoxal[c]	-1000	1000	0	R00173	Vitamin B6 metabolism_pyridoxal-5'-phosphate phosphohydrolase	1
R01911 Vitamin B6 metabolism_pyridoxine-5'-phosphate phosphohydrolase	orthophosphate[c] + pyridoxine[c] <==> h2o[c] + pyridoxine phosphate[c]	orthophosphate[c] + pyridoxine[c] <=> h2o[c] + pyridoxine phosphate[c]	-1000	1000	0	R01911	Vitamin B6 metabolism_pyridoxine-5'-phosphate phosphohydrolase	1
R02494 Vitamin B6 metabolism_pyridoxamine-5'-phosphate phosphohydrolase	orthophosphate[c] + pyridoxamine[c] <==> h2o[c] + pyridoxamine phosphate[c]	orthophosphate[c] + pyridoxamine[c] <=> h2o[c] + pyridoxamine phosphate[c]	-1000	1000	0	R02494	Vitamin B6 metabolism_pyridoxamine-5'-phosphate phosphohydrolase	1
R00112 Nicotinate and nicotinamide metabolism_NatpH:NAD+ oxidoreductase	nad+[c] + natph+[c]<==> nadh+[c]+ natp+[c]	nad+[c] + natph+[c]<=> nadh+[c]+ natp+[c]	-1000	1000	0	R00112	Nicotinate and nicotinamide metabolism_NatpH:NAD+ oxidoreductase	0
R00183 Nicotinate and nicotinamide metabolism_adenosine 5'-monophosphate phosphohydrolase	amp[c] + h2o[c] <==> adenosine[c] + orthophosphate[c]	amp[c] + h2o[c] <=> adenosine[c] + orthophosphate[c]	-1000	1000	0	R00183	Nicotinate and nicotinamide metabolism_adenosine 5'-monophosphate phosphohydrolase	1
R00511 Nicotinate and nicotinamide metabolism_cytidine-5'-monophosphate phosphohydrolase	cmp[c] + h2o[c] <==> cytidine[c] + orthophosphate[c]	cmp[c] + h2o[c] <=> cytidine[c] + orthophosphate[c]	-1000	1000	0	R00511	Nicotinate and nicotinamide metabolism_cytidine-5'-monophosphate phosphohydrolase	1
R00963 Nicotinate and nicotinamide metabolism_uridine 5'-monophosphate phosphohydrolase	h2o[c] + ump[c] <==> orthophosphate[c] + uridine[c]	h2o[c] + ump[c] <=> orthophosphate[c] + uridine[c]	-1000	1000	0	R00963	Nicotinate and nicotinamide metabolism_uridine 5'-monophosphate phosphohydrolase	1
R01126 Nicotinate and nicotinamide metabolism_inosine 5'-monophosphate phosphohydrolase	h2o[c] + imp[c] <==> inosine[c] + orthophosphate[c]	h2o[c] + imp[c] <=> inosine[c] + orthophosphate[c]	-1000	1000	0	R01126	Nicotinate and nicotinamide metabolism_inosine 5'-monophosphate phosphohydrolase	1
R01227 Nicotinate and nicotinamide metabolism_guanosine 5'-monophosphate phosphohydrolase	gmp[c] + h2o[c] <==> guanosine[c] + orthophosphate[c]	gmp[c] + h2o[c] <=> guanosine[c] + orthophosphate[c]	-1000	1000	0	R01227	Nicotinate and nicotinamide metabolism_guanosine 5'-monophosphate phosphohydrolase	1
R02323 Nicotinate and nicotinamide metabolism_nicotinamide ribonucleotide phosphohydrolase	h2o[c] + nicotinamide d-ribonucleotide[c] <==> nicotinamide-beta-riboside[c] + orthophosphate[c]	h2o[c] + nicotinamide d-ribonucleotide[c] <=> nicotinamide-beta-riboside[c] + orthophosphate[c]	-1000	1000	0	R02323	Nicotinate and nicotinamide metabolism_nicotinamide ribonucleotide phosphohydrolase	1
R02719 Nicotinate and nicotinamide metabolism_xanthosine 5'-phosphate phosphohydrolase	h2o[c] + xanthosine 5'-phosphate[c] <==> orthophosphate[c] + xanthosine[c]	h2o[c] + xanthosine 5'-phosphate[c] <=> orthophosphate[c] + xanthosine[c]	-1000	1000	0	R02719	Nicotinate and nicotinamide metabolism_xanthosine 5'-phosphate phosphohydrolase	1
R03346 Nicotinate and nicotinamide metabolism_nicotinate D-ribonucleotide phosphohydrolase	h2o[c] + nicotinate d-ribonucleotide[c] <==> nicotinate d-ribonucleoside[c] + orthophosphate[c]	h2o[c] + nicotinate d-ribonucleotide[c] <=> nicotinate d-ribonucleoside[c] + orthophosphate[c]	-1000	1000	0	R03346	Nicotinate and nicotinamide metabolism_nicotinate D-ribonucleotide phosphohydrolase	1
R01569 Nicotinate and nicotinamide metabolism_thymidylate 5'-phosphohydrolase	dtmp[c] + h2o[c] <==> orthophosphate[c] + thymidine[c]	dtmp[c] + h2o[c] <=> orthophosphate[c] + thymidine[c]	-1000	1000	0	R01569	Nicotinate and nicotinamide metabolism_thymidylate 5'-phosphohydrolase	1
R01664 Nicotinate and nicotinamide metabolism_2'-deoxycytidine 5'-monophosphate phosphohydrolase	dcmp[c] + h2o[c] <==> deoxycytidine[c] + orthophosphate[c]	dcmp[c] + h2o[c] <=> deoxycytidine[c] + orthophosphate[c]	-1000	1000	0	R01664	Nicotinate and nicotinamide metabolism_2'-deoxycytidine 5'-monophosphate phosphohydrolase	1
R01968 Nicotinate and nicotinamide metabolism_2'-deoxyguanosine 5'-monophosphate phosphohydrolase	dgmp[c] + h2o[c] <==> deoxyguanosine[c] + orthophosphate[c]	dgmp[c] + h2o[c] <=> deoxyguanosine[c] + orthophosphate[c]	-1000	1000	0	R01968	Nicotinate and nicotinamide metabolism_2'-deoxyguanosine 5'-monophosphate phosphohydrolase	1
R02088 Nicotinate and nicotinamide metabolism_2'-deoxyadenosine 5'-monophosphate phosphohydrolase	damp[c] + h2o[c] <==> deoxyadenosine[c] + orthophosphate[c]	damp[c] + h2o[c] <=> deoxyadenosine[c] + orthophosphate[c]	-1000	1000	0	R02088	Nicotinate and nicotinamide metabolism_2'-deoxyadenosine 5'-monophosphate phosphohydrolase	1
R02102 Nicotinate and nicotinamide metabolism_2'-deoxyuridine 5'-monophosphate phosphohydrolase	dump[c] + h2o[c] <==> deoxyuridine[c] + orthophosphate[c]	dump[c] + h2o[c] <=> deoxyuridine[c] + orthophosphate[c]	-1000	1000	0	R02102	Nicotinate and nicotinamide metabolism_2'-deoxyuridine 5'-monophosphate phosphohydrolase	1
R00189 Nicotinate and nicotinamide metabolism_deamido-NAD+:ammonia ligase (AMP-forming)	ammonia[c] + atp[c] + deamino-nad+[c] <==> amp[c] + diphosphate[c] + nad+[c]	ammonia[c] + atp[c] + deamino-nad+[c] <=> amp[c] + diphosphate[c] + nad+[c]	-1000	1000	0	R00189	Nicotinate and nicotinamide metabolism_deamido-NAD+:ammonia ligase (AMP-forming)	0
R00104 Nicotinate and nicotinamide metabolism_atp:NAD+ 2'-phosphotransferase	atp[c] + nad+[c] <==> atp[c] + natp+[c]	atp[c] + nad+[c] <=> atp[c] + natp+[c]	-1000	1000	0	R00104	Nicotinate and nicotinamide metabolism_atp:NAD+ 2'-phosphotransferase	0
R07297 Nicotinate and nicotinamide metabolism_₅'-ribonucleotide phosphohydrolase	5'-ribonucleotide[c] + h2o[c] <==> orthophosphate[c] + ribonucleoside[c]	5'-ribonucleotide[c] + h2o[c] <=> orthophosphate[c] + ribonucleoside[c]	-1000	1000	0	R07297	Nicotinate and nicotinamide metabolism_₅'-ribonucleotide phosphohydrolase	1
R01724 Nicotinate and nicotinamide metabolism₅-phospho-alpha-D-ribose 1-diphosphate:nicotinate ligase (atp, diphosphate-forming)	atp[c] + diphosphate[c] + nicotinate d-ribonucleotide[c] + orthophosphate[c] <==> 5-phospho-alpha-d-ribose 1-diphosphate[c] + atp[c] + h+[c] + h2o[c] + nicotinate[c]	atp[c] + diphosphate[c] + nicotinate d-ribonucleotide[c] + orthophosphate[c] <=> 5-phospho-alpha-d-ribose 1-diphosphate[c] + atp[c] + h+[c] + h2o[c] + nicotinate[c]	-1000	1000	0	R01724	Nicotinate and nicotinamide metabolism₅-phospho-alpha-D-ribose 1-diphosphate:nicotinate ligase (atp, diphosphate-forming)	1
R00257 Nicotinate and nicotinamide metabolism_Deamido-NAD+:L-glutamine amido-ligase (AMP-forming)	atp[c] + deamino-nad+[c] + h2o[c] + l-glutamine[c] <==> amp[c] + diphosphate[c] + l-glutamate[c] + nad+[c]	atp[c] + deamino-nad+[c] + h2o[c] + l-glutamine[c] <=> amp[c] + diphosphate[c] + l-glutamate[c] + nad+[c]	-1000	1000	0	R00257	Nicotinate and nicotinamide metabolism_Deamido-NAD+:L-glutamine amido-ligase (AMP-forming)	0
R04231 Pantothenate and CoA biosynthesis _(R)-4'-Phosphopantothenate:L-cysteine ligase	ctp[c] + d-4'-phosphopantothenate[c] + l-cysteine[c] <==> cmp[c] + diphosphate[c] + (r)-4'-phosphopantothenoyl-l-cysteine[c]	ctp[c] + d-4'-phosphopantothenate[c] + l-cysteine[c] <=> cmp[c] + diphosphate[c] + (r)-4'-phosphopantothenoyl-l-cysteine[c]	-1000	1000	0	R04231	Pantothenate and CoA biosynthesis _(R)-4'-Phosphopantothenate:L-cysteine ligase	0
R03269 Pantothenate and CoA biosynthesis _N-[(R)-4'-Phosphopantothenoyl]-L-cysteine carboxy-lyase	(r)-4'-phosphopantothenoyl-l-cysteine[c] <==> co2[c] + pantetheine 4'-phosphate[c]	(r)-4'-phosphopantothenoyl-l-cysteine[c] <=> co2[c] + pantetheine 4'-phosphate[c]	-1000	1000	0	R03269	Pantothenate and CoA biosynthesis _N-[(R)-4'-Phosphopantothenoyl]-L-cysteine carboxy-lyase	0
R01625 Pantothenate and CoA biosynthesis _CoA:apo-[acyl-carrier-protein] pantetheinephosphotransferase	apo-[acyl-carrier-protein][c] + coa[c] <==> acyl-carrier protein[c] + adenosine 3',5'-bisphosphate[c]	apo-[acyl-carrier-protein][c] + coa[c] <=> acyl-carrier protein[c] + adenosine 3',5'-bisphosphate[c]	-1000	1000	0	R01625	Pantothenate and CoA biosynthesis _CoA:apo-[acyl-carrier-protein] pantetheinephosphotransferase	1
R00130 Pantothenate and CoA biosynthesis _atp:dephospho-CoA 3'-phosphotransferase	atp[c] + dephospho-coa[c] <==> atp[c] + coa[c]	atp[c] + dephospho-coa[c] <=> atp[c] + coa[c]	-1000	1000	0	R00130	Pantothenate and CoA biosynthesis _atp:dephospho-CoA 3'-phosphotransferase	1
R04230 Pantothenate and CoA biosynthesis _(R)-4'-Phosphopantothenate:L-cysteine ligase	atp[c] + d-4'-phosphopantothenate[c] + l-cysteine[c] <==> amp[c] + diphosphate[c] + (r)-4'-phosphopantothenoyl-l-cysteine[c]	atp[c] + d-4'-phosphopantothenate[c] + l-cysteine[c] <=> amp[c] + diphosphate[c] + (r)-4'-phosphopantothenoyl-l-cysteine[c]	-1000	1000	0	R04230	Pantothenate and CoA biosynthesis _(R)-4'-Phosphopantothenate:L-cysteine ligase	0
R02971 Pantothenate and CoA biosynthesis _atp:pantothenate 4'-phosphotransferase	atp[c] + pantetheine[c] <==> atp[c] + pantetheine 4'-phosphate[c]	atp[c] + pantetheine[c] <=> atp[c] + pantetheine 4'-phosphate[c]	-1000	1000	0	R02971	Pantothenate and CoA biosynthesis _atp:pantothenate 4'-phosphotransferase	1
R01415 Pantothenate and CoA biosynthesis _5,6-Dihydrothymine:Natp+ oxidoreductase	5,6-dihydrothymine[c] + natp+[c] <==> h+[c] + natph+[c]+ thymine[c]	5,6-dihydrothymine[c] + natp+[c] <=> h+[c] + natph+[c]+ thymine[c]	-1000	1000	0	R01415	Pantothenate and CoA biosynthesis _5,6-Dihydrothymine:Natp+ oxidoreductase	1
R08226 Pantothenate and CoA biosynthesis _5,6-dihydro-5-fluorouracil:Natp+ 5-oxidoreductase	5-fu[c] + h+[c] + natph+[c]<==> 5,6-dihydro-5-fluorouracil[c] + natp+[c]	5-fu[c] + h+[c] + natph+[c]<=> 5,6-dihydro-5-fluorouracil[c] + natp+[c]	-1000	1000	0	R08226	Pantothenate and CoA biosynthesis _5,6-dihydro-5-fluorouracil:Natp+ 5-oxidoreductase	1
R04391 Pantothenate and CoA biosynthesis _atp:pantothenate 4'-phosphotransferase	atp[c] + n-((r)-pantothenoyl)-l-cysteine[c] <==> atp[c] + (r)-4'-phosphopantothenoyl-l-cysteine[c]	atp[c] + n-((r)-pantothenoyl)-l-cysteine[c] <=> atp[c] + (r)-4'-phosphopantothenoyl-l-cysteine[c]	-1000	1000	0	R04391	Pantothenate and CoA biosynthesis _atp:pantothenate 4'-phosphotransferase	1
R10119 Biotin Metabolism_glutaryl-[acp]-methyl-ester:malonyl-[acyl-carrier protein] C-acyltransferase (decarboxylating)	glutaryl-[acp] methyl ester[c] + malonyl-[acyl-carrier protein][c] <==> 3-ketopimeloyl-[acp] methyl ester[c] + acyl-carrier protein[c] + co2[c]	glutaryl-[acp] methyl ester[c] + malonyl-[acyl-carrier protein][c] <=> 3-ketopimeloyl-[acp] methyl ester[c] + acyl-carrier protein[c] + co2[c]	-1000	1000	0	R10119	Biotin Metabolism_glutaryl-[acp]-methyl-ester:malonyl-[acyl-carrier protein] C-acyltransferase (decarboxylating)	1
R10115 Biotin Metabolism_malonyl-[acyl-carrier protein]-methyl-ester:malonyl-[acyl-carrier protein] C-acyltransferase	malonyl-[acp] methyl ester[c] + malonyl-[acyl-carrier protein][c] <==> 3-ketoglutaryl-[acp] methyl ester[c] + acyl-carrier protein[c] + co2[c]	malonyl-[acp] methyl ester[c] + malonyl-[acyl-carrier protein][c] <=> 3-ketoglutaryl-[acp] methyl ester[c] + acyl-carrier protein[c] + co2[c]	-1000	1000	0	R10115	Biotin Metabolism_malonyl-[acyl-carrier protein]-methyl-ester:malonyl-[acyl-carrier protein] C-acyltransferase	1
R07770 Lipoic acid metabolism_atp:lipoate adenylyltransferase	atp[c] + lipoate[c] <==> diphosphate[c] + lipoyl-amp[c]	atp[c] + lipoate[c] <=> diphosphate[c] + lipoyl-amp[c]	-1000	1000	0	R07770	Lipoic acid metabolism_atp:lipoate adenylyltransferase	1
R07771 Lipoic acid metabolism_	apoprotein[c] + lipoyl-amp[c] <==> amp[c] + protein n6-(lipoyl)lysine[c]	apoprotein[c] + lipoyl-amp[c] <=> amp[c] + protein n6-(lipoyl)lysine[c]	-1000	1000	0	R07771	Lipoic acid metabolism_	1
R00626 Folate biosynthesis_phosphate-monoester phosphohydrolase	h2o[c] + orthophosphoric monoester[c] <==> alcohol[c] + orthophosphate[c]	h2o[c] + orthophosphoric monoester[c] <=> alcohol[c] + orthophosphate[c]	-1000	1000	0	R00626	Folate biosynthesis_phosphate-monoester phosphohydrolase	1
R03024 Folate biosynthesis_4-Nitrophenyl phosphate phosphohydrolase	4-nitrophenyl phosphate[c] + h2o[c] <==> 4-nitrophenol[c] + orthophosphate[c]	4-nitrophenyl phosphate[c] + h2o[c] <=> 4-nitrophenol[c] + orthophosphate[c]	-1000	1000	0	R03024	Folate biosynthesis_4-Nitrophenyl phosphate phosphohydrolase	1
R01010 Folate biosynthesis_Glycerone phosphate phosphohydrolase	glycerone phosphate[c] + h2o[c] <==> glycerone[c] + orthophosphate[c]	glycerone phosphate[c] + h2o[c] <=> glycerone[c] + orthophosphate[c]	-1000	1000	0	R01010	Folate biosynthesis_Glycerone phosphate phosphohydrolase	1
R04620 Folate biosynthesis_2-Amino-4-hydroxy-6-(erythro-1,2,3-trihydroxypropyl) dihydropteridine triphosphate phosphohydrolase (alkaline optimum)	7,8-dihydroneopterin 3'-triphosphate[c] + (3) h2o[c] <==> 2-amino-4-hydroxy-6-(d-erythro-1,2,3-trihydroxypropyl)-7,8-dihydropteridine[c] + (3) orthophosphate[c]	7,8-dihydroneopterin 3'-triphosphate[c] + (3) h2o[c] <=> 2-amino-4-hydroxy-6-(d-erythro-1,2,3-trihydroxypropyl)-7,8-dihydropteridine[c] + (3) orthophosphate[c]	-1000	1000	0	R04620	Folate biosynthesis_2-Amino-4-hydroxy-6-(erythro-1,2,3-trihydroxypropyl) dihydropteridine triphosphate phosphohydrolase (alkaline optimum)	1
R07354 Folate biosynthesis_5,6,7,8-tetrahydropteridine:NAD+ oxidoreductase	nad+[c] + tetrahydropteridine[c] <==> dihydropteridine[c] + h+[c] + nadh[c]	nad+[c] + tetrahydropteridine[c] <=> dihydropteridine[c] + h+[c] + nadh[c]	-1000	1000	0	R07354	Folate biosynthesis_5,6,7,8-tetrahydropteridine:NAD+ oxidoreductase	0
R01793 Folate biosynthesis_5,6,7,8-tetrahydrobiopterin:NAD+ oxidoreductase	dihydrobiopterin[c] + h+[c] + nadh+[c]<==> nad+[c] + tetrahydrobiopterin[c]	dihydrobiopterin[c] + h+[c] + nadh+[c]<=> nad+[c] + tetrahydrobiopterin[c]	-1000	1000	0	R01793	Folate biosynthesis_5,6,7,8-tetrahydrobiopterin:NAD+ oxidoreductase	0
R07355 Folate biosynthesis_5,6,7,8-tetrahydropteridine:Natp+ oxidoreductase	natp+[c] + tetrahydropteridine[c] <==> dihydropteridine[c] + h+[c] + natph[c]	natp+[c] + tetrahydropteridine[c] <=> dihydropteridine[c] + h+[c] + natph[c]	-1000	1000	0	R07355	Folate biosynthesis_5,6,7,8-tetrahydropteridine:Natp+ oxidoreductase	0
R01794 Folate biosynthesis_5,6,7,8-tetrahydrobiopterin:Natp+ oxidoreductase	dihydrobiopterin[c] + h+[c] + natph+[c]<==> natp+[c] + tetrahydrobiopterin[c]	dihydrobiopterin[c] + h+[c] + natph+[c]<=> natp+[c] + tetrahydrobiopterin[c]	-1000	1000	0	R01794	Folate biosynthesis_5,6,7,8-tetrahydrobiopterin:Natp+ oxidoreductase	0
R05553 Folate biosynthesis_4-amino-4-deoxychorismate pyruvate-lyase	4-amino-4-deoxychorismate[c] <==> 4-aminobenzoate[c] + pyruvate[c]	4-amino-4-deoxychorismate[c] <=> 4-aminobenzoate[c] + pyruvate[c]	-1000	1000	0	R05553	Folate biosynthesis_4-amino-4-deoxychorismate pyruvate-lyase	1
R02237 Folate biosynthesis_7,8-dihydropteroate:L-glutamate ligase (atp-forming)	atp[c] + dihydropteroate[c] + l-glutamate[c] <==> atp[c] + dihydrofolate[c] + orthophosphate[c]	atp[c] + dihydropteroate[c] + l-glutamate[c] <=> atp[c] + dihydrofolate[c] + orthophosphate[c]	-1000	1000	0	R02237	Folate biosynthesis_7,8-dihydropteroate:L-glutamate ligase (atp-forming)	1
R04241 Folate biosynthesis_tetrahydropteroyl-gamma-polyglutamate:L-glutamate gamma-ligase (atp-forming)	atp[c] + l-glutamate[c] + thf-polyglutamate(n)[c] <==> atp[c] + orthophosphate[c] + thf-polyglutamate(n+1)[c]	atp[c] + l-glutamate[c] + thf-polyglutamate(n)[c] <=> atp[c] + orthophosphate[c] + thf-polyglutamate(n+1)[c]	-1000	1000	0	R04241	Folate biosynthesis_tetrahydropteroyl-gamma-polyglutamate:L-glutamate gamma-ligase (atp-forming)	1
R00942 Folate biosynthesis_Tetrahydrofolate:L-glutamate gamma-ligase (atp-forming)	atp[c] + l-glutamate[c] + tetrahydrofolate[c] <==> atp[c] + orthophosphate[c] + thf-l-glutamate[c]	atp[c] + l-glutamate[c] + tetrahydrofolate[c] <=> atp[c] + orthophosphate[c] + thf-l-glutamate[c]	-1000	1000	0	R00942	Folate biosynthesis_Tetrahydrofolate:L-glutamate gamma-ligase (atp-forming)	1
R01654 Folate biosynthesis_10-Formyltetrahydrofolate:L-glutamate ligase (atp-forming)	10-formyltetrahydrofolate[c] + atp[c] + l-glutamate[c] <==> (6r)-10-formyltetrahydropteroyldiglutamate[c] + atp[c] + orthophosphate[c]	10-formyltetrahydrofolate[c] + atp[c] + l-glutamate[c] <=> (6r)-10-formyltetrahydropteroyldiglutamate[c] + atp[c] + orthophosphate[c]	-1000	1000	0	R01654	Folate biosynthesis_10-Formyltetrahydrofolate:L-glutamate ligase (atp-forming)	1
R04242 Folate biosynthesis_tetrahydropteroyl-poly-gamma-glutamate gamma-glutamylhydrolase	h2o[c] + thf-polyglutamate[c] <==> n l-glutamate[c] + tetrahydrofolate[c]	h2o[c] + thf-polyglutamate[c] <=> n l-glutamate[c] + tetrahydrofolate[c]	-1000	1000	0	R04242	Folate biosynthesis_tetrahydropteroyl-poly-gamma-glutamate gamma-glutamylhydrolase	1
R03197 Porphyrin and chlorophyll metabolism_Uroporphyrinogen-III carboxy-lyase	uroporphyrinogen iii[c] <==> (4) co2[c] + coproporphyrinogen iii[c]	uroporphyrinogen iii[c] <=> (4) co2[c] + coproporphyrinogen iii[c]	-1000	1000	0	R03197	Porphyrin and chlorophyll metabolism_Uroporphyrinogen-III carboxy-lyase	1
R04972 Porphyrin and chlorophyll metabolism_Uroporphyrinogen I carboxy-lyase	uroporphyrinogen i[c] <==> (4) co2[c] + coproporphyrinogen i[c]	uroporphyrinogen i[c] <=> (4) co2[c] + coproporphyrinogen i[c]	-1000	1000	0	R04972	Porphyrin and chlorophyll metabolism_Uroporphyrinogen I carboxy-lyase	1
R00036 Porphyrin and chlorophyll metabolism₅-aminolevulinate hydro-lyase (adding 5-aminolevulinate and cyclizing; porphobilinogen-forming)	(2) 5-aminolevulinate[c] <==> (2) h2o[c] + porphobilinogen[c]	(2) 5-aminolevulinate[c] <=> (2) h2o[c] + porphobilinogen[c]	-1000	1000	0	R00036	Porphyrin and chlorophyll metabolism₅-aminolevulinate hydro-lyase (adding 5-aminolevulinate and cyclizing; porphobilinogen-forming)	0
R00084 Porphyrin and chlorophyll metabolism_porphobilinogen:(4-[2-carboxyethyl]-3-[carboxymethyl]pyrrol-2-yl)methyltransferase (hydrolysing); porphobilinogen ammonia-lyase (polymerizing)	h2o[c] + (4) porphobilinogen[c] <==> (4) ammonia[c] + hydroxymethylbilane[c]	h2o[c] + (4) porphobilinogen[c] <=> (4) ammonia[c] + hydroxymethylbilane[c]	-1000	1000	0	R00084	Porphyrin and chlorophyll metabolism_porphobilinogen:(4-[2-carboxyethyl]-3-[carboxymethyl]pyrrol-2-yl)methyltransferase (hydrolysing); porphobilinogen ammonia-lyase (polymerizing)	1
R03220 Porphyrin and chlorophyll metabolism_Coproporphyrinogen:oxygen oxidoreductase(decarboxylating)	coproporphyrinogen iii[c] + oxygen[c] <==> (2) co2[c] + (2) h2o[c] + protoporphyrinogen ix[c]	coproporphyrinogen iii[c] + oxygen[c] <=> (2) co2[c] + (2) h2o[c] + protoporphyrinogen ix[c]	-1000	1000	0	R03220	Porphyrin and chlorophyll metabolism_Coproporphyrinogen:oxygen oxidoreductase(decarboxylating)	0
R06895 Porphyrin and chlorophyll metabolism_coproporphyrinogen-III:S-adenosyl-L-methionine oxidoreductase(decarboxylating)	coproporphyrinogen iii[c] + (2) s-adenosyl-l-methionine[c] <==> (2) 5'-deoxyadenosine[c] + (2) co2[c] + (2) l-methionine[c] + protoporphyrinogen ix[c]	coproporphyrinogen iii[c] + (2) s-adenosyl-l-methionine[c] <=> (2) 5'-deoxyadenosine[c] + (2) co2[c] + (2) l-methionine[c] + protoporphyrinogen ix[c]	-1000	1000	0	R06895	Porphyrin and chlorophyll metabolism_coproporphyrinogen-III:S-adenosyl-L-methionine oxidoreductase(decarboxylating)	1
R03222 Porphyrin and chlorophyll metabolism_protoporphyrinogen-IX:oxygen oxidoreductase	(3) oxygen[c] + protoporphyrinogen ix[c] <==> (3) hydrogen peroxide[c] + protoporphyrin[c]	(3) oxygen[c] + protoporphyrinogen ix[c] <=> (3) hydrogen peroxide[c] + protoporphyrin[c]	-1000	1000	0	R03222	Porphyrin and chlorophyll metabolism_protoporphyrinogen-IX:oxygen oxidoreductase	0
R00310 Porphyrin and chlorophyll metabolism_protoheme ferro-lyase (protoporphyrin-forming)	fe2+[c] + protoporphyrin[c] <==> (2) h+[c] + heme[c]	fe2+[c] + protoporphyrin[c] <=> (2) h+[c] + heme[c]	-1000	1000	0	R00310	Porphyrin and chlorophyll metabolism_protoheme ferro-lyase (protoporphyrin-forming)	1
R05578 Porphyrin and chlorophyll metabolism_L-glutamate:tRNA(Glu) ligase (AMP-forming)	atp[c] + l-glutamate[c] + trna(glu)[c] <==> amp[c] + diphosphate[c] + l-glutamyl-trna(glu)[c]	atp[c] + l-glutamate[c] + trna(glu)[c] <=> amp[c] + diphosphate[c] + l-glutamyl-trna(glu)[c]	-1000	1000	0	R05578	Porphyrin and chlorophyll metabolism_L-glutamate:tRNA(Glu) ligase (AMP-forming)	1
R03245 Terpenoid backbone biosynthesis_atp:(R)-5-phosphomevalonate phosphotransferase	atp[c] + (r)-5-phosphomevalonate[c] <==> atp[c] + (r)-5-diphosphomevalonate[c]	atp[c] + (r)-5-phosphomevalonate[c] <=> atp[c] + (r)-5-diphosphomevalonate[c]	-1000	1000	0	R03245	Terpenoid backbone biosynthesis_atp:(R)-5-phosphomevalonate phosphotransferase	0
R01121 Terpenoid backbone biosynthesis_atp:(R)-5-diphosphomevalonate carboxy-lyase (adding atp; isopentenyl-diphosphate-forming); atp:(R)-5-diphosphomevalonate carboxy-lyase (dehydrating)	atp[c] + (r)-5-diphosphomevalonate[c] <==> atp[c] + co2[c] + isopentenyl diphosphate[c] + orthophosphate[c]	atp[c] + (r)-5-diphosphomevalonate[c] <=> atp[c] + co2[c] + isopentenyl diphosphate[c] + orthophosphate[c]	-1000	1000	0	R01121	Terpenoid backbone biosynthesis_atp:(R)-5-diphosphomevalonate carboxy-lyase (adding atp; isopentenyl-diphosphate-forming); atp:(R)-5-diphosphomevalonate carboxy-lyase (dehydrating)	0
R01123 Terpenoid backbone biosynthesis_Isopentenyl-diphosphate delta3-delta2-isomerase	isopentenyl diphosphate[c] <==> dimethylallyl diphosphate[c]	isopentenyl diphosphate[c] <=> dimethylallyl diphosphate[c]	-1000	1000	0	R01123	Terpenoid backbone biosynthesis_Isopentenyl-diphosphate delta3-delta2-isomerase	0
R02061 Terpenoid backbone biosynthesis_trans,trans-Farnesyl-diphosphate:isopentenyl-diphosphate farnesyltranstransferase	isopentenyl diphosphate[c] + trans,trans-farnesyl diphosphate[c] <==> diphosphate[c] + geranylgeranyl diphosphate[c]	isopentenyl diphosphate[c] + trans,trans-farnesyl diphosphate[c] <=> diphosphate[c] + geranylgeranyl diphosphate[c]	-1000	1000	0	R02061	Terpenoid backbone biosynthesis_trans,trans-Farnesyl-diphosphate:isopentenyl-diphosphate farnesyltranstransferase	1
R02003 Terpenoid backbone biosynthesis_Geranyl-diphosphate:isopentenyl-diphosphate geranyltrans-transferase	geranyl diphosphate[c] + isopentenyl diphosphate[c] <==> diphosphate[c] + trans,trans-farnesyl diphosphate[c]	geranyl diphosphate[c] + isopentenyl diphosphate[c] <=> diphosphate[c] + trans,trans-farnesyl diphosphate[c]	-1000	1000	0	R02003	Terpenoid backbone biosynthesis_Geranyl-diphosphate:isopentenyl-diphosphate geranyltrans-transferase	0
R09562 Terpenoid backbone biosynthesis_S-(2E,6E)-farnesyl-L-cysteine oxidase	farnesylcysteine[c] + h2o[c] + oxygen[c] <==> 2-trans,6-trans-farnesal[c] + hydrogen peroxide[c] + l-cysteine[c]	farnesylcysteine[c] + h2o[c] + oxygen[c] <=> 2-trans,6-trans-farnesal[c] + hydrogen peroxide[c] + l-cysteine[c]	-1000	1000	0	R09562	Terpenoid backbone biosynthesis_S-(2E,6E)-farnesyl-L-cysteine oxidase	1
R07360 Terpenoid backbone biosynthesis_S-prenyl-L-cysteine:oxygen oxidoreductase	h2o[c] + oxygen[c] + prenyl-l-cysteine[c] <==> hydrogen peroxide[c] + l-cysteine[c] + prenal[c]	h2o[c] + oxygen[c] + prenyl-l-cysteine[c] <=> hydrogen peroxide[c] + l-cysteine[c] + prenal[c]	-1000	1000	0	R07360	Terpenoid backbone biosynthesis_S-prenyl-L-cysteine:oxygen oxidoreductase	1
R04496 Terpenoid backbone biosynthesis_S-Adenosyl-L-methionine:protein-C-terminal-S-farnesyl-L-cysteine O-methyltransferase	protein c-terminal s-farnesyl-l-cysteine[c] + s-adenosyl-l-methionine[c] <==> protein c-terminal s-farnesyl-l-cysteine methyl ester[c] + s-adenosyl-l-homocysteine[c]	protein c-terminal s-farnesyl-l-cysteine[c] + s-adenosyl-l-methionine[c] <=> protein c-terminal s-farnesyl-l-cysteine methyl ester[c] + s-adenosyl-l-homocysteine[c]	-1000	1000	0	R04496	Terpenoid backbone biosynthesis_S-Adenosyl-L-methionine:protein-C-terminal-S-farnesyl-L-cysteine O-methyltransferase	1
R01658 Terpenoid backbone biosynthesis_Dimethylallyl-diphosphate:isopentenyl-diphosphate dimethylallyltranstransferase	dimethylallyl diphosphate[c] + isopentenyl diphosphate[c] <==> diphosphate[c] + geranyl diphosphate[c]	dimethylallyl diphosphate[c] + isopentenyl diphosphate[c] <=> diphosphate[c] + geranyl diphosphate[c]	-1000	1000	0	R01658	Terpenoid backbone biosynthesis_Dimethylallyl-diphosphate:isopentenyl-diphosphate dimethylallyltranstransferase	0
R09845 Terpenoid backbone biosynthesis_CAAX protease	h2o[c] + s-farnesyl protein[c] <==> peptide[c] + protein c-terminal s-farnesyl-l-cysteine[c]	h2o[c] + s-farnesyl protein[c] <=> peptide[c] + protein c-terminal s-farnesyl-l-cysteine[c]	-1000	1000	0	R09845	Terpenoid backbone biosynthesis_CAAX protease	0
R09844 Terpenoid backbone biosynthesis_farnesyl-diphosphate:protein-cysteine farnesyltransferase	protein-cysteine[c] + trans,trans-farnesyl diphosphate[c] <==> diphosphate[c] + s-farnesyl protein[c]	protein-cysteine[c] + trans,trans-farnesyl diphosphate[c] <=> diphosphate[c] + s-farnesyl protein[c]	-1000	1000	0	R09844	Terpenoid backbone biosynthesis_farnesyl-diphosphate:protein-cysteine farnesyltransferase	1
R05556 Terpenoid backbone biosynthesis_(2E,6E)-farnesyl-diphosphate:isopentenyl-diphosphate cistransferase (adding 10-55 isopentenyl units)	n isopentenyl diphosphate[c] + trans,trans-farnesyl diphosphate[c] <==> dehydrodolichol diphosphate[c] + n diphosphate[c]	n isopentenyl diphosphate[c] + trans,trans-farnesyl diphosphate[c] <=> dehydrodolichol diphosphate[c] + n diphosphate[c]	-1000	1000	0	R05556	Terpenoid backbone biosynthesis_(2E,6E)-farnesyl-diphosphate:isopentenyl-diphosphate cistransferase (adding 10-55 isopentenyl units)	1
R00132 Nitrogen metabolism_carbonate hydro-lyase (carbon-dioxide-forming); carbonic acid hydro-lyase	carbonic acid[c] <==> co2[c] + h2o[c]	carbonic acid[c] <=> co2[c] + h2o[c]	-1000	1000	0	R00132	Nitrogen metabolism_carbonate hydro-lyase (carbon-dioxide-forming); carbonic acid hydro-lyase	1
R10092 Nitrogen metabolism_carbonate hydro-lyase (carbon-dioxide-forming); carbonic acid hydro-lyase	h+[c] + hco3-[c] <==> co2[c] + h2o[c]	h+[c] + hco3-[c] <=> co2[c] + h2o[c]	-1000	1000	0	R10092	Nitrogen metabolism_carbonate hydro-lyase (carbon-dioxide-forming); carbonic acid hydro-lyase	0
R05320 Sulfur metabolism_Taurine, 2-oxoglutarate:O2 oxidoreductase (sulfite-forming)	2-oxoglutarate[c] + oxygen[c] + taurine[c] <==> aminoacetaldehyde[c] + co2[c] + succinate[c] + sulfite[c]	2-oxoglutarate[c] + oxygen[c] + taurine[c] <=> aminoacetaldehyde[c] + co2[c] + succinate[c] + sulfite[c]	-1000	1000	0	R05320	Sulfur metabolism_Taurine, 2-oxoglutarate:O2 oxidoreductase (sulfite-forming)	1
R01931 Sulfur metabolism_thiosulfate:cyanide sulfurtranserase	cyanide ion[c] + thiosulfate[c] <==> sulfite[c] + thiocyanate[c]	cyanide ion[c] + thiosulfate[c] <=> sulfite[c] + thiocyanate[c]	-1000	1000	0	R01931	Sulfur metabolism_thiosulfate:cyanide sulfurtranserase	1
R03132 Sulfur metabolism_O3-acetyl-L-serine acetate-lyase (adding hydrogen sulfide)	o-acetyl-l-serine[c] + thiosulfate[c] <==> Acetate[c] + s-sulfo-l-cysteine[c]	o-acetyl-l-serine[c] + thiosulfate[c] <=> Acetate[c] + s-sulfo-l-cysteine[c]	-1000	1000	0	R03132	Sulfur metabolism_O3-acetyl-L-serine acetate-lyase (adding hydrogen sulfide)	1
R03601 Sulfur metabolism_O3-Acetyl-L-serine acetate-lyase (adding hydrogen sulfide)	h2o[c] + n-acetyl-d-glucosaminylphosphatidylinositol[c] <==> 6-(alpha-d-glucosaminyl)-1-phosphatidyl-1d-myo-inositol[c] + acetate[c]	h2o[c] + n-acetyl-d-glucosaminylphosphatidylinositol[c] <=> 6-(alpha-d-glucosaminyl)-1-phosphatidyl-1d-myo-inositol[c] + acetate[c]	-1000	1000	0	R03601	Sulfur metabolism_O3-Acetyl-L-serine acetate-lyase (adding hydrogen sulfide)	0
R04859 Sulfur metabolism_O3-acetyl-L-serine:thiosulfate 2-amino-2-carboxyethyltransferase (reducing, L-cysteine-forming); O3-acetyl-L-serine acetate-lyase (thiosulfate-reducing, L-cysteine-forming)	h+[c] + o-acetyl-l-serine[c] + thioredoxin[c] + thiosulfate[c] <==> Acetate[c] + l-cysteine[c] + sulfite[c] + thioredoxin disulfide[c]	h+[c] + o-acetyl-l-serine[c] + thioredoxin[c] + thiosulfate[c] <=> Acetate[c] + l-cysteine[c] + sulfite[c] + thioredoxin disulfide[c]	-1000	1000	0	R04859	Sulfur metabolism_O3-acetyl-L-serine:thiosulfate 2-amino-2-carboxyethyltransferase (reducing, L-cysteine-forming); O3-acetyl-L-serine acetate-lyase (thiosulfate-reducing, L-cysteine-forming)	0
R00897 Sulfur metabolism_O3-acetyl-L-serine:hydrogen-sulfide 2-amino-2-carboxyethyltransferase; O3-acetyl-L-serine acetate-lyase (adding hydrogen sulfide)	hydrogen sulfide[c] + o-acetyl-l-serine[c] <==> Acetate[c] + l-cysteine[c]	hydrogen sulfide[c] + o-acetyl-l-serine[c] <=> Acetate[c] + l-cysteine[c]	-1000	1000	0	R00897	Sulfur metabolism_O3-acetyl-L-serine:hydrogen-sulfide 2-amino-2-carboxyethyltransferase; O3-acetyl-L-serine acetate-lyase (adding hydrogen sulfide)	0
R10826 Vancomycin resistance_very-long-chain-(3R)-3-hydroxyacyl-CoA:Natp+ oxidoreductase	natp+[c] + very-long-chain (3r)-3-hydroxyacyl-coa[c] <==> h+[c] + natph+[c]+ very-long-chain 3-oxoacyl-coa[c]	natp+[c] + very-long-chain (3r)-3-hydroxyacyl-coa[c] <=> h+[c] + natph+[c]+ very-long-chain 3-oxoacyl-coa[c]	-1000	1000	0	R10826	Vancomycin resistance_very-long-chain-(3R)-3-hydroxyacyl-CoA:Natp+ oxidoreductase	0
R02222 Vancomycin resistance_steroyl-CoA,hydrogen-donor:oxygen oxidoreductase	(2) ferrocytochrome b5[c] + (2) h+[c] + oxygen[c] + stearoyl-coa[c] <==> (2) ferricytochrome b5[c] + (2) h2o[c] + oleoyl-coa[c]	(2) ferrocytochrome b5[c] + (2) h+[c] + oxygen[c] + stearoyl-coa[c] <=> (2) ferricytochrome b5[c] + (2) h2o[c] + oleoyl-coa[c]	-1000	1000	0	R02222	Vancomycin resistance_steroyl-CoA,hydrogen-donor:oxygen oxidoreductase	1
R07651 Vancomycin resistance_D-Ala-D-Ala dipeptidase	d-alanyl-d-alanine[c] + h2o[c] <==> (2) d-alanine[c]	d-alanyl-d-alanine[c] + h2o[c] <=> (2) d-alanine[c]	-1000	1000	0	R07651	Vancomycin resistance_D-Ala-D-Ala dipeptidase	1
R00086 ABC transporters_atp phosphohydrolase	atp[c] + h2o[c] <==> atp[c] + orthophosphate[c]	atp[c] + h2o[c] <=> atp[c] + orthophosphate[c]	-1000	1000	0	R00086	ABC transporters_atp phosphohydrolase	0
R10815 RNA degradation₅'-(N7-methylguanosine 5'-triphospho)-[mRNA] N7-methylguanosine-5'-diphosphate phosphohydrolase	h2o[c] + m7g(5')pppr-mrna[c] <==> 5'-phospho-[mrna][c] + n7-methylguanosine 5'-diphosphate[c]	h2o[c] + m7g(5')pppr-mrna[c] <=> 5'-phospho-[mrna][c] + n7-methylguanosine 5'-diphosphate[c]	-1000	1000	0	R10815	RNA degradation₅'-(N7-methylguanosine 5'-triphospho)-[mRNA] N7-methylguanosine-5'-diphosphate phosphohydrolase	1
R00435 RNA degradation _atp:polynucleotide adenylyltransferase; atp:RNA adenylyltransferase	atp[c] + rna[c] <==> diphosphate[c] + rna[c]	atp[c] + rna[c] <=> diphosphate[c] + rna[c]	-1000	1000	0	R00435	RNA degradation _atp:polynucleotide adenylyltransferase; atp:RNA adenylyltransferase	0
R04206 RNA degradation _3-Phospho-D-erythronate hydro-lyase	3-phospho-d-erythronate[c] <==> h2o[c] + phosphoenol-4-deoxy-3-tetrulosonate[c]	3-phospho-d-erythronate[c] <=> h2o[c] + phosphoenol-4-deoxy-3-tetrulosonate[c]	-1000	1000	0	R04206	RNA degradation _3-Phospho-D-erythronate hydro-lyase	1
R00444 RNA polymerase_nucleoside-triphosphate:RNA nucleotidyltransferase (DNA-directed); nucleoside-triphosphate:RNA nucleotidyltransferase (RNA-directed)	nucleoside triphosphate[c] + rna[c] <==> diphosphate[c] + rna[c]	nucleoside triphosphate[c] + rna[c] <=> diphosphate[c] + rna[c]	-1000	1000	0	R00444	RNA polymerase_nucleoside-triphosphate:RNA nucleotidyltransferase (DNA-directed); nucleoside-triphosphate:RNA nucleotidyltransferase (RNA-directed)	0
R00442 RNA polymerase_CTP:RNA cytidylyltransferase (DNA-directed); CTP:RNA cytidylyltransferase (RNA-directed)	ctp[c] + rna[c] <==> diphosphate[c] + rna[c]	ctp[c] + rna[c] <=> diphosphate[c] + rna[c]	-1000	1000	0	R00442	RNA polymerase_CTP:RNA cytidylyltransferase (DNA-directed); CTP:RNA cytidylyltransferase (RNA-directed)	0
R00441 RNA polymerase_GTP:RNA guanylyltransferase (DNA-directed); GTP:RNA guanylyltransferase (RNA-directed)	gtp[c] + rna[c] <==> diphosphate[c] + rna[c]	gtp[c] + rna[c] <=> diphosphate[c] + rna[c]	-1000	1000	0	R00441	RNA polymerase_GTP:RNA guanylyltransferase (DNA-directed); GTP:RNA guanylyltransferase (RNA-directed)	0
R00443 RNA polymerase_UTP:RNA uridylyltransferase	rna[c] + utp[c] <==> diphosphate[c] + rna[c]	rna[c] + utp[c] <=> diphosphate[c] + rna[c]	-1000	1000	0	R00443	RNA polymerase_UTP:RNA uridylyltransferase	0
R10813 RNA polymerase_nucleoside-triphosphate:nucleoside-triphosphate nucleotidyltransferase (DNA-directed)	n nucleoside triphosphate[c] <==> 5'-triphospho-[mrna](n)[c] + (n-1) diphosphate[c]	n nucleoside triphosphate[c] <=> 5'-triphospho-[mrna](n)[c] + (n-1) diphosphate[c]	-1000	1000	0	R10813	RNA polymerase_nucleoside-triphosphate:nucleoside-triphosphate nucleotidyltransferase (DNA-directed)	1
R00379 Base excision repair_Deoxynucleoside triphosphate:DNA deoxynucleotidyltransferase	deoxynucleoside triphosphate[c] + dna(n)[c] <==> diphosphate[c] + dna(n+1)[c]	deoxynucleoside triphosphate[c] + dna(n)[c] <=> diphosphate[c] + dna(n+1)[c]	-1000	1000	0	R00379	Base excision repair_Deoxynucleoside triphosphate:DNA deoxynucleotidyltransferase	1
R00375 Base excision repair_Deoxyadenosine 5'-triphosphate:DNA deoxynucleotidyltransferase (DNA-directed)	datp[c] + dna[c] <==> diphosphate[c] + dna[c]	datp[c] + dna[c] <=> diphosphate[c] + dna[c]	-1000	1000	0	R00375	Base excision repair_Deoxyadenosine 5'-triphosphate:DNA deoxynucleotidyltransferase (DNA-directed)	0
R00376 Base excision repair_Deoxyguanosine 5'-triphosphate:DNA deoxynucleotidyltransferase (DNA-directed)	dgtp[c] + dna[c] <==> diphosphate[c] + dna[c]	dgtp[c] + dna[c] <=> diphosphate[c] + dna[c]	-1000	1000	0	R00376	Base excision repair_Deoxyguanosine 5'-triphosphate:DNA deoxynucleotidyltransferase (DNA-directed)	0
R00377 Base excision repair_Deoxycytidine triphosphate:DNA deoxynucleotidyltransferase (DNA-directed)	dctp[c] + dna[c] <==> diphosphate[c] + dna[c]	dctp[c] + dna[c] <=> diphosphate[c] + dna[c]	-1000	1000	0	R00377	Base excision repair_Deoxycytidine triphosphate:DNA deoxynucleotidyltransferase (DNA-directed)	0
R00378 Base excision repair_deoxythymidine triphosphate:DNA deoxynucleotidyltransferase (DNA-directed)	dna[c] + dttp[c] <==> diphosphate[c] + dna[c]	dna[c] + dttp[c] <=> diphosphate[c] + dna[c]	-1000	1000	0	R00378	Base excision repair_deoxythymidine triphosphate:DNA deoxynucleotidyltransferase (DNA-directed)	0
R00381 Base excision repair_deoxyribonucleotide)n:5'-phospho-(deoxyribonucleotide)m ligase (AMP-forming)	5'-phospho-dna(m)[c] + atp[c] + dna(n)[c] <==> amp[c] + diphosphate[c] + dna(n+m)[c]	5'-phospho-dna(m)[c] + atp[c] + dna(n)[c] <=> amp[c] + diphosphate[c] + dna(n+m)[c]	-1000	1000	0	R00381	Base excision repair_deoxyribonucleotide)n:5'-phospho-(deoxyribonucleotide)m ligase (AMP-forming)	0
R00382 Base excision repair_deoxyribonucleotide)n:5'-phospho-(deoxyribonucleotide)m ligase (AMP-forming, NMN-forming)	5'-phospho-dna(m)[c] + dna(n)[c] + nad+[c] <==> amp[c] + dna(n+m)[c] + nicotinamide d-ribonucleotide[c]	5'-phospho-dna(m)[c] + dna(n)[c] + nad+[c] <=> amp[c] + dna(n+m)[c] + nicotinamide d-ribonucleotide[c]	-1000	1000	0	R00382	Base excision repair_deoxyribonucleotide)n:5'-phospho-(deoxyribonucleotide)m ligase (AMP-forming, NMN-forming)	0
R10822 Base excision repair_(deoxyribonucleotide)n:5'-phospho-(deoxyribonucleotide)m ligase (atp)	5'-phospho-dna(m)[c] + atp[c] + dna(n)[c] <==> amp[c] + dna(n+m)[c] + orthophosphate[c]	5'-phospho-dna(m)[c] + atp[c] + dna(n)[c] <=> amp[c] + dna(n+m)[c] + orthophosphate[c]	-1000	1000	0	R10822	Base excision repair_(deoxyribonucleotide)n:5'-phospho-(deoxyribonucleotide)m ligase (atp)	0
R10823 Base excision repair_deoxyribonucleotide)n:5'-phospho-(deoxyribonucleotide)m ligase (GTP)	5'-phospho-dna(m)[c] + dna(n)[c] + gtp[c] <==> diphosphate[c] + dna(n+m)[c] + gmp[c]	5'-phospho-dna(m)[c] + dna(n)[c] + gtp[c] <=> diphosphate[c] + dna(n+m)[c] + gmp[c]	-1000	1000	0	R10823	Base excision repair_deoxyribonucleotide)n:5'-phospho-(deoxyribonucleotide)m ligase (GTP)	0
R04176 Base excision repair_NAD+:poly(adenosine diphosphate D-ribose)atp-D-ribosyltransferase	atp-d-ribosyl-acceptor[c] + nad+[c] <==> atp-d-ribosyl-acceptor[c] + h+[c] + nicotinamide[c]	atp-d-ribosyl-acceptor[c] + nad+[c] <=> atp-d-ribosyl-acceptor[c] + h+[c] + nicotinamide[c]	-1000	1000	0	R04176	Base excision repair_NAD+:poly(adenosine diphosphate D-ribose)atp-D-ribosyltransferase	1
R10951 Phosphatidylinositol signaling system_atp:1-phosphatidyl-1D-myo-inositol 5-phosphotransferase	1-phosphatidyl-d-myo-inositol[c] + atp[c] <==> 1-phosphatidyl-1d-myo-inositol 5-phosphate[c] + atp[c]	1-phosphatidyl-d-myo-inositol[c] + atp[c] <=> 1-phosphatidyl-1d-myo-inositol 5-phosphate[c] + atp[c]	-1000	1000	0	R10951	Phosphatidylinositol signaling system_atp:1-phosphatidyl-1D-myo-inositol 5-phosphotransferase	0
R03330 Phosphatidylinositol signaling system_D-myo-Inositol-1,3-bisphosphate 3-phosphohydrolase	d-myo-inositol 1,3-bisphosphate[c] + h2o[c] <==> inositol 1-phosphate[c] + orthophosphate[c]	d-myo-inositol 1,3-bisphosphate[c] + h2o[c] <=> inositol 1-phosphate[c] + orthophosphate[c]	-1000	1000	0	R03330	Phosphatidylinositol signaling system_D-myo-Inositol-1,3-bisphosphate 3-phosphohydrolase	1
R06875 Phosphatidylinositol signaling system_1-Phosphatidyl-1D-myo-inositol 3,4-bisphosphate 3-phosphohydrolase	1-phosphatidyl-1d-myo-inositol 3,4-bisphosphate[c] + h2o[c] <==> 1-phosphatidyl-1d-myo-inositol 4-phosphate[c] + orthophosphate[c]	1-phosphatidyl-1d-myo-inositol 3,4-bisphosphate[c] + h2o[c] <=> 1-phosphatidyl-1d-myo-inositol 4-phosphate[c] + orthophosphate[c]	-1000	1000	0	R06875	Phosphatidylinositol signaling system_1-Phosphatidyl-1D-myo-inositol 3,4-bisphosphate 3-phosphohydrolase	1
R10928 Phosphatidylinositol signaling system_1-phosphatidyl-1D-myo-inositol-3,5-bisphosphate 3-phosphohydrolase	1-phosphatidyl-1d-myo-inositol 3,5-bisphosphate[c] + h2o[c] <==> 1-phosphatidyl-1d-myo-inositol 5-phosphate[c] + orthophosphate[c]	1-phosphatidyl-1d-myo-inositol 3,5-bisphosphate[c] + h2o[c] <=> 1-phosphatidyl-1d-myo-inositol 5-phosphate[c] + orthophosphate[c]	-1000	1000	0	R10928	Phosphatidylinositol signaling system_1-phosphatidyl-1D-myo-inositol-3,5-bisphosphate 3-phosphohydrolase	0
R02585 Phosphatidylinositol signaling system_Protein-tyrosine-phosphate phosphohydrolase	h2o[c] + protein tyrosine phosphate[c] <==> orthophosphate[c] + protein tyrosine[c]	h2o[c] + protein tyrosine phosphate[c] <=> orthophosphate[c] + protein tyrosine[c]	-1000	1000	0	R02585	Phosphatidylinositol signaling system_Protein-tyrosine-phosphate phosphohydrolase	1
R04513 Phosphatidylinositol signaling system_Phosphatidylinositol-3,4,5-trisphosphate 3-phosphohydrolase	h2o[c] + phosphatidylinositol-3,4,5-trisphosphate[c] <==> 1-phosphatidyl-d-myo-inositol 4,5-bisphosphate[c] + orthophosphate[c]	h2o[c] + phosphatidylinositol-3,4,5-trisphosphate[c] <=> 1-phosphatidyl-d-myo-inositol 4,5-bisphosphate[c] + orthophosphate[c]	-1000	1000	0	R04513	Phosphatidylinositol signaling system_Phosphatidylinositol-3,4,5-trisphosphate 3-phosphohydrolase	1
R03332 Phosphatidylinositol signaling system_1-Phosphatidyl-D-myo-inositol inositolphosphohydrolase	1-phosphatidyl-d-myo-inositol[c] + h2o[c] <==> 1,2-diacyl-sn-glycerol[c] + inositol 1-phosphate[c]	1-phosphatidyl-d-myo-inositol[c] + h2o[c] <=> 1,2-diacyl-sn-glycerol[c] + inositol 1-phosphate[c]	-1000	1000	0	R03332	Phosphatidylinositol signaling system_1-Phosphatidyl-D-myo-inositol inositolphosphohydrolase	0
R10952 Phosphatidylinositol signaling system_1-phosphatidyl-1D-myo-inositol-4-phosphate inositolbisphosphohydrolase	1-phosphatidyl-1d-myo-inositol 4-phosphate[c] + h2o[c] <==> 1,2-diacyl-sn-glycerol[c] + 1d-myo-inositol 1,4-bisphosphate[c]	1-phosphatidyl-1d-myo-inositol 4-phosphate[c] + h2o[c] <=> 1,2-diacyl-sn-glycerol[c] + 1d-myo-inositol 1,4-bisphosphate[c]	-1000	1000	0	R10952	Phosphatidylinositol signaling system_1-phosphatidyl-1D-myo-inositol-4-phosphate inositolbisphosphohydrolase	1
R03479 Phosphatidylinositol signaling system_atp:1D-myo-inositol-3,4,5,6-tetrakisphosphate 1-phosphotransferase	1d-myo-inositol 3,4,5,6-tetrakisphosphate[c] + atp[c] <==> 1d-myo-inositol 1,3,4,5,6-pentakisphosphate[c] + atp[c]	1d-myo-inositol 3,4,5,6-tetrakisphosphate[c] + atp[c] <=> 1d-myo-inositol 1,3,4,5,6-pentakisphosphate[c] + atp[c]	-1000	1000	0	R03479	Phosphatidylinositol signaling system_atp:1D-myo-inositol-3,4,5,6-tetrakisphosphate 1-phosphotransferase	1
R03429 Phosphatidylinositol signaling system_atp:1D-myo-inositol-1,3,4-trisphosphate 6-phosphotransferase	1d-myo-inositol 1,3,4-trisphosphate[c] + atp[c] <==> 1d-myo-inositol 1,3,4,6-tetrakisphosphate[c] + atp[c]	1d-myo-inositol 1,3,4-trisphosphate[c] + atp[c] <=> 1d-myo-inositol 1,3,4,6-tetrakisphosphate[c] + atp[c]	-1000	1000	0	R03429	Phosphatidylinositol signaling system_atp:1D-myo-inositol-1,3,4-trisphosphate 6-phosphotransferase	1
(1) R05799 Phosphatidylinositol signaling system_atp:1D-myo-inositol-hexakisphosphate phosphotransferase	atp[c] + phytic acid[c] <==> 1-diphosinositol pentakisphosphate[c] + atp[c]	atp[c] + phytic acid[c] <=> 1-diphosinositol pentakisphosphate[c] + atp[c]	-1000	1000	0	R05799	Phosphatidylinositol signaling system_atp:1D-myo-inositol-hexakisphosphate phosphotransferase	0
R08964 Phosphatidylinositol signaling system_atp:1D-myo-inositol-5-diphosphate-pentakisphosphate phosphotransferase	5-pp-insp5[c] + atp[c] <==> 1d-myo-inositol 1,5-bis(diphosphate) 2,3,4,6-tetrakisphosphate[c] + atp[c]	5-pp-insp5[c] + atp[c] <=> 1d-myo-inositol 1,5-bis(diphosphate) 2,3,4,6-tetrakisphosphate[c] + atp[c]	-1000	1000	0	R08964	Phosphatidylinositol signaling system_atp:1D-myo-inositol-5-diphosphate-pentakisphosphate phosphotransferase	1
(2) R05799 Phosphatidylinositol signaling system_atp:1D-myo-inositol-hexakisphosphate phosphotransferase	atp[c] + phytic acid[c] <==> 1-diphosinositol pentakisphosphate[c] + atp[c]	atp[c] + phytic acid[c] <=> 1-diphosinositol pentakisphosphate[c] + atp[c]	-1000	1000	0	R05799	Phosphatidylinositol signaling system_atp:1D-myo-inositol-hexakisphosphate phosphotransferase	0
R02240 Phosphatidylinositol signaling system_atp:1,2-diacylglycerol 3-phosphotransferase	1,2-diacyl-sn-glycerol[c] + atp[c] <==> atp[c] + phosphatidate[c]	1,2-diacyl-sn-glycerol[c] + atp[c] <=> atp[c] + phosphatidate[c]	-1000	1000	0	R02240	Phosphatidylinositol signaling system_atp:1,2-diacylglycerol 3-phosphotransferase	0
R01799 Phosphatidylinositol signaling system_CTP:phosphatidate cytidyltransferase	ctp[c] + phosphatidate[c] <==> cdp-diacylglycerol[c] + diphosphate[c]	ctp[c] + phosphatidate[c] <=> cdp-diacylglycerol[c] + diphosphate[c]	-1000	1000	0	R01799	Phosphatidylinositol signaling system_CTP:phosphatidate cytidyltransferase	0
R04273 Ubiquitin mediated proteolysis_Peptidylproline cis-trans-isomerase	peptidylproline (omega=180)[c] <==> peptidylproline (omega=0)[c]	peptidylproline (omega=180)[c] <=> peptidylproline (omega=0)[c]	-1000	1000	0	R04273	Ubiquitin mediated proteolysis_Peptidylproline cis-trans-isomerase	1
R03106 Sulfur relay system_3-mercaptopyruvate:cyanide sulfurtransferase	hydrogen cyanide[c] + mercaptopyruvate[c] <==> pyruvate[c] + thiocyanate[c]	hydrogen cyanide[c] + mercaptopyruvate[c] <=> pyruvate[c] + thiocyanate[c]	-1000	1000	0	R03106	Sulfur relay system_3-mercaptopyruvate:cyanide sulfurtransferase	1
R03105 Sulfur relay system_3-Mercaptopyruvate:cyanide sulfurtransferase	mercaptopyruvate[c] + sulfite[c] <==> pyruvate[c] + thiosulfate[c]	mercaptopyruvate[c] + sulfite[c] <=> pyruvate[c] + thiosulfate[c]	-1000	1000	0	R03105	Sulfur relay system_3-Mercaptopyruvate:cyanide sulfurtransferase	0
R00162 Regulation of autophagy_atp:protein phosphotransferase (Ca2+/calmodulin-dependent)	atp[c] + protein[c] <==> atp[c] + phosphoprotein[c]	atp[c] + protein[c] <=> atp[c] + phosphoprotein[c]	-1000	1000	0	R00162	Regulation of autophagy_atp:protein phosphotransferase (Ca2+/calmodulin-dependent)	0
R03632 Regulation of autophagy_atp:protamine O-phosphotransferase	atp[c] + protamine[c] <==> atp[c] + o-phosphoprotamine[c]	atp[c] + protamine[c] <=> atp[c] + o-phosphoprotamine[c]	-1000	1000	0	R03632	Regulation of autophagy_atp:protamine O-phosphotransferase	1
R01975 Peroxisome_(S)-3-Hydroxybutanoyl-CoA:NAD+ oxidoreductase	nad+[c] + (s)-3-hydroxybutanoyl-coa[c] <==> acetoacetyl-coa[c] + h+[c] + nadh[c]	nad+[c] + (s)-3-hydroxybutanoyl-coa[c] <=> acetoacetyl-coa[c] + h+[c] + nadh[c]	-1000	1000	0	R01975	Peroxisome_(S)-3-Hydroxybutanoyl-CoA:NAD+ oxidoreductase	0
R04203 Peroxisome_(2S,3S)-3-hydroxy-2-methylbutanoyl-CoA:NAD+ oxidoreductase	(2s,3s)-3-hydroxy-2-methylbutanoyl-coa[c] + nad+[c] <==> 2-methylacetoacetyl-coa[c] + h+[c] + nadh[c]	(2s,3s)-3-hydroxy-2-methylbutanoyl-coa[c] + nad+[c] <=> 2-methylacetoacetyl-coa[c] + h+[c] + nadh[c]	-1000	1000	0	R04203	Peroxisome_(2S,3S)-3-hydroxy-2-methylbutanoyl-CoA:NAD+ oxidoreductase	0
R04739 Peroxisome_(S)-3-Hydroxytetradecanoyl-CoA:NAD+ oxidoreductase	nad+[c] + (s)-3-hydroxytetradecanoyl-coa[c] <==> 3-oxotetradecanoyl-coa[c] + nadh[c]	nad+[c] + (s)-3-hydroxytetradecanoyl-coa[c] <=> 3-oxotetradecanoyl-coa[c] + nadh[c]	-1000	1000	0	R04739	Peroxisome_(S)-3-Hydroxytetradecanoyl-CoA:NAD+ oxidoreductase	0
R04741 Peroxisome_(S)-3-hydroxydodecanoyl-CoA:NAD+ oxidoreductase	nad+[c] + (s)-3-hydroxydodecanoyl-coa[c] <==> 3-oxododecanoyl-coa[c] + h+[c] + nadh[c]	nad+[c] + (s)-3-hydroxydodecanoyl-coa[c] <=> 3-oxododecanoyl-coa[c] + h+[c] + nadh[c]	-1000	1000	0	R04741	Peroxisome_(S)-3-hydroxydodecanoyl-CoA:NAD+ oxidoreductase	0
R04743 Peroxisome_(S)-hydroxydecanoyl-CoA:NAD+ oxidoreductase	nad+[c] + (s)-hydroxydecanoyl-coa[c] <==> 3-oxodecanoyl-coa[c] + h+[c] + nadh[c]	nad+[c] + (s)-hydroxydecanoyl-coa[c] <=> 3-oxodecanoyl-coa[c] + h+[c] + nadh[c]	-1000	1000	0	R04743	Peroxisome_(S)-hydroxydecanoyl-CoA:NAD+ oxidoreductase	0
R04745 Peroxisome_(S)-hydroxyoctanoyl-CoA:NAD+ oxidoreductase	nad+[c] + (s)-3-hydroxyoctanoyl-coa[c] <==> 3-oxooctanoyl-coa[c] + h+[c] + nadh[c]	nad+[c] + (s)-3-hydroxyoctanoyl-coa[c] <=> 3-oxooctanoyl-coa[c] + h+[c] + nadh[c]	-1000	1000	0	R04745	Peroxisome_(S)-hydroxyoctanoyl-CoA:NAD+ oxidoreductase	0
R04748 Peroxisome₍S)-hydroxyhexanoyl-CoA:NAD+ oxidoreductase	nad+[c] + (s)-hydroxyhexanoyl-coa[c] <==> 3-oxohexanoyl-coa[c] + h+[c] + nadh[c]	nad+[c] + (s)-hydroxyhexanoyl-coa[c] <=> 3-oxohexanoyl-coa[c] + h+[c] + nadh[c]	-1000	1000	0	R04748	Peroxisome₍S)-hydroxyhexanoyl-CoA:NAD+ oxidoreductase	0
R04810 Peroxisome_3alpha,7alpha,24-trihydroxy-5beta-cholestanoyl-CoA:NAD+ oxidoreductase	3alpha,7alpha,24-trihydroxy-5beta-cholestanoyl-coa[c] + nad+[c] <==> 3alpha,7alpha-dihydroxy-5beta-24-oxocholestanoyl-coa[c] + h+[c] + nadh[c]	3alpha,7alpha,24-trihydroxy-5beta-cholestanoyl-coa[c] + nad+[c] <=> 3alpha,7alpha-dihydroxy-5beta-24-oxocholestanoyl-coa[c] + h+[c] + nadh[c]	-1000	1000	0	R04810	Peroxisome_3alpha,7alpha,24-trihydroxy-5beta-cholestanoyl-CoA:NAD+ oxidoreductase	0
R04812 Peroxisome_3alpha,7alpha,12alpha,24-tetrahydroxy-5beta-cholestanoyl-CoA:NAD+ oxidoreductase	3alpha,7alpha,12alpha,24-tetrahydroxy-5beta-cholestanoyl-coa[c] + nad+[c] <==> 3alpha,7alpha,12alpha-trihydroxy-5beta-24-oxocholestanoyl-coa[c] + h+[c] + nadh[c]	3alpha,7alpha,12alpha,24-tetrahydroxy-5beta-cholestanoyl-coa[c] + nad+[c] <=> 3alpha,7alpha,12alpha-trihydroxy-5beta-24-oxocholestanoyl-coa[c] + h+[c] + nadh[c]	-1000	1000	0	R04812	Peroxisome_3alpha,7alpha,12alpha,24-tetrahydroxy-5beta-cholestanoyl-CoA:NAD+ oxidoreductase	0
R06941 Peroxisome₍S)-3-hydroxyacyl-CoA:NAD+ oxidoreductase	(3s)-3-hydroxyadipyl-coa[c] + nad+[c] <==> 3-oxoadipyl-coa[c] + h+[c] + nadh[c]	(3s)-3-hydroxyadipyl-coa[c] + nad+[c] <=> 3-oxoadipyl-coa[c] + h+[c] + nadh[c]	-1000	1000	0	R06941	Peroxisome₍S)-3-hydroxyacyl-CoA:NAD+ oxidoreductase	0
R07890 Peroxisome_	3-hydroxy-opc8-coa[c] + nad+[c] <==> 3-oxo-opc8-coa[c] + h+[c] + nadh[c]	3-hydroxy-opc8-coa[c] + nad+[c] <=> 3-oxo-opc8-coa[c] + h+[c] + nadh[c]	-1000	1000	0	R07890	Peroxisome_	0
R07894 Peroxisome_	3-hydroxy-opc6-coa[c] + nad+[c] <==> 3-oxo-opc6-coa[c] + h+[c] + nadh[c]	3-hydroxy-opc6-coa[c] + nad+[c] <=> 3-oxo-opc6-coa[c] + h+[c] + nadh[c]	-1000	1000	0	R07894	Peroxisome_	0
R07898 Peroxisome_	3-hydroxy-opc4-coa[c] + nad+[c] <==> 3-oxo-opc4-coa[c] + h+[c] + nadh[c]	3-hydroxy-opc4-coa[c] + nad+[c] <=> 3-oxo-opc4-coa[c] + h+[c] + nadh[c]	-1000	1000	0	R07898	Peroxisome_	0
R05066 Peroxisome_3-Hydroxy-2-methylpropanoate:NAD+ oxidoreductase	nad+[c] + (s)-3-hydroxyisobutyrate[c] <==> h+[c] + nadh+[c]+ (s)-methylmalonate semialdehyde[c]	nad+[c] + (s)-3-hydroxyisobutyrate[c] <=> h+[c] + nadh+[c]+ (s)-methylmalonate semialdehyde[c]	-1000	1000	0	R05066	Peroxisome_3-Hydroxy-2-methylpropanoate:NAD+ oxidoreductase	1
R05305 Peroxisome₃-hydroxypimeloyl-CoA:NAD+ oxidoreductase	3-hydroxypimeloyl-coa[c] + nad+[c] <==> 3-oxopimeloyl-coa[c] + h+[c] + nadh[c]	3-hydroxypimeloyl-coa[c] + nad+[c] <=> 3-oxopimeloyl-coa[c] + h+[c] + nadh[c]	-1000	1000	0	R05305	Peroxisome₃-hydroxypimeloyl-CoA:NAD+ oxidoreductase	1
R05575 Peroxisome₍3S)-3-Hydroxyacyl-CoA:NAD+ oxidoreductase	(hydroxymethylphenyl)succinyl-coa[c] + nad+[c] <==> benzoylsuccinyl-coa[c] + h+[c] + nadh[c]	(hydroxymethylphenyl)succinyl-coa[c] + nad+[c] <=> benzoylsuccinyl-coa[c] + h+[c] + nadh[c]	-1000	1000	0	R05575	Peroxisome₍3S)-3-Hydroxyacyl-CoA:NAD+ oxidoreductase	1
R08094 Peroxisome_3-hydroxy-5-methylhex-4-enoyl-CoA:NAD+ oxidoreductase	3-hydroxy-5-methylhex-4-enoyl-coa[c] + nad+[c] <==> 5-methyl-3-oxo-4-hexenoyl-coa[c] + h+[c] + nadh[c]	3-hydroxy-5-methylhex-4-enoyl-coa[c] + nad+[c] <=> 5-methyl-3-oxo-4-hexenoyl-coa[c] + h+[c] + nadh[c]	-1000	1000	0	R08094	Peroxisome_3-hydroxy-5-methylhex-4-enoyl-CoA:NAD+ oxidoreductase	0
R04813 Peroxisome_(24R,25R)-3alpha,7alpha,12alpha,24-tetrahydroxy-5beta-cholestanoyl-CoA hydro-lyase	3alpha,7alpha,12alpha,24-tetrahydroxy-5beta-cholestanoyl-coa[c] <==> 3alpha,7alpha,12alpha-trihydroxy-5beta-cholest-24-enoyl-coa[c] + h2o[c]	3alpha,7alpha,12alpha,24-tetrahydroxy-5beta-cholestanoyl-coa[c] <=> 3alpha,7alpha,12alpha-trihydroxy-5beta-cholest-24-enoyl-coa[c] + h2o[c]	-1000	1000	0	R04813	Peroxisome_(24R,25R)-3alpha,7alpha,12alpha,24-tetrahydroxy-5beta-cholestanoyl-CoA hydro-lyase	1
R04809 Peroxisome_3alpha,7alpha,24-trihydroxy-5beta-cholestanoyl-CoA hydro-lyase [3alpha,7alpha-dihydroxy-5beta-cholest-24-enoyl-CoA-forming]	3alpha,7alpha-dihydroxy-5beta-cholest-24-enoyl-coa[c] + h2o[c] <==> 3alpha,7alpha,24-trihydroxy-5beta-cholestanoyl-coa[c]	3alpha,7alpha-dihydroxy-5beta-cholest-24-enoyl-coa[c] + h2o[c] <=> 3alpha,7alpha,24-trihydroxy-5beta-cholestanoyl-coa[c]	-1000	1000	0	R04809	Peroxisome_3alpha,7alpha,24-trihydroxy-5beta-cholestanoyl-CoA hydro-lyase [3alpha,7alpha-dihydroxy-5beta-cholest-24-enoyl-CoA-forming]	1
R03719 Peroxisome_3alpha,7alpha,12alpha-trihydroxy-5beta-cholanoyl-CoA:propanoyl-CoA C-acyltransferase; Choloyl-CoA:propanoyl-CoA C-acyltransferase	choloyl-coa[c] + propanoyl-coa[c] <==> 3alpha,7alpha,12alpha-trihydroxy-5beta-24-oxocholestanoyl-coa[c] + coa[c]	choloyl-coa[c] + propanoyl-coa[c] <=> 3alpha,7alpha,12alpha-trihydroxy-5beta-24-oxocholestanoyl-coa[c] + coa[c]	-1000	1000	0	R03719	Peroxisome_3alpha,7alpha,12alpha-trihydroxy-5beta-cholanoyl-CoA:propanoyl-CoA C-acyltransferase; Choloyl-CoA:propanoyl-CoA C-acyltransferase	1
R04811 Peroxisome_Propanoyl-CoA:acetyl-CoA C-acyltransferase; 3alpha,7alpha-dihydroxy-5beta-cholanoyl-CoA:propanoyl-CoA; C-acyltransferase	chenodeoxycholoyl-coa[c] + propanoyl-coa[c] <==> 3alpha,7alpha-dihydroxy-5beta-24-oxocholestanoyl-coa[c] + coa[c]	chenodeoxycholoyl-coa[c] + propanoyl-coa[c] <=> 3alpha,7alpha-dihydroxy-5beta-24-oxocholestanoyl-coa[c] + coa[c]	-1000	1000	0	R04811	Peroxisome_Propanoyl-CoA:acetyl-CoA C-acyltransferase; 3alpha,7alpha-dihydroxy-5beta-cholanoyl-CoA:propanoyl-CoA; C-acyltransferase	1
R00391 Peroxisome_Acyl-CoA:acetyl-CoA C-acyltransferase	acetyl-coa[c] + acyl-coa[c] <==> 3-oxoacyl-coa[c] + coa[c]	acetyl-coa[c] + acyl-coa[c] <=> 3-oxoacyl-coa[c] + coa[c]	-1000	1000	0	R00391	Peroxisome_Acyl-CoA:acetyl-CoA C-acyltransferase	0
R00829 Peroxisome_succinyl-CoA:acetyl-CoA C-acyltransferase; beta-ketoadipyl-CoA thiolase	acetyl-coa[c] + succinyl-coa[c] <==> 3-oxoadipyl-coa[c] + coa[c]	acetyl-coa[c] + succinyl-coa[c] <=> 3-oxoadipyl-coa[c] + coa[c]	-1000	1000	0	R00829	Peroxisome_succinyl-CoA:acetyl-CoA C-acyltransferase; beta-ketoadipyl-CoA thiolase	0
R00927 Peroxisome_acetyl-CoA:propanoyl-CoA 2-C-acetyltransferase; 2-methylacetoacetyl-CoA thiolase	acetyl-coa[c] + propanoyl-coa[c] <==> 2-methylacetoacetyl-coa[c] + coa[c]	acetyl-coa[c] + propanoyl-coa[c] <=> 2-methylacetoacetyl-coa[c] + coa[c]	-1000	1000	0	R00927	Peroxisome_acetyl-CoA:propanoyl-CoA 2-C-acetyltransferase; 2-methylacetoacetyl-CoA thiolase	0
R01177 Peroxisome_butanoyl-CoA:acetyl-CoA C-butanoyltransferase	acetyl-coa[c] + butanoyl-coa[c] <==> 3-oxohexanoyl-coa[c] + coa[c]	acetyl-coa[c] + butanoyl-coa[c] <=> 3-oxohexanoyl-coa[c] + coa[c]	-1000	1000	0	R01177	Peroxisome_butanoyl-CoA:acetyl-CoA C-butanoyltransferase	0
R03778 Peroxisome_Octanoyl-CoA:acetyl-CoA C-acyltransferase	acetyl-coa[c] + octanoyl-coa[c] <==> 3-oxodecanoyl-coa[c] + coa[c]	acetyl-coa[c] + octanoyl-coa[c] <=> 3-oxodecanoyl-coa[c] + coa[c]	-1000	1000	0	R03778	Peroxisome_Octanoyl-CoA:acetyl-CoA C-acyltransferase	0
R03858 Peroxisome_Lauroyl-CoA:acetyl-CoA C-acyltransferase	acetyl-coa[c] + lauroyl-coa[c] <==> 3-oxotetradecanoyl-coa[c] + coa[c]	acetyl-coa[c] + lauroyl-coa[c] <=> 3-oxotetradecanoyl-coa[c] + coa[c]	-1000	1000	0	R03858	Peroxisome_Lauroyl-CoA:acetyl-CoA C-acyltransferase	0
R04742 Peroxisome_Decanoyl-CoA:acetyl-CoA C-acyltransferase	acetyl-coa[c] + decanoyl-coa[c] <==> 3-oxododecanoyl-coa[c] + coa[c]	acetyl-coa[c] + decanoyl-coa[c] <=> 3-oxododecanoyl-coa[c] + coa[c]	-1000	1000	0	R04742	Peroxisome_Decanoyl-CoA:acetyl-CoA C-acyltransferase	0
R04747 Peroxisome_Hexanoyl-CoA:acetyl-CoA C-acyltransferase	acetyl-coa[c] + hexanoyl-coa[c] <==> 3-oxooctanoyl-coa[c] + coa[c]	acetyl-coa[c] + hexanoyl-coa[c] <=> 3-oxooctanoyl-coa[c] + coa[c]	-1000	1000	0	R04747	Peroxisome_Hexanoyl-CoA:acetyl-CoA C-acyltransferase	0
R05506 Peroxisome_	benzoyl acetyl-coa[c] + coa[c] <==> acetyl-coa[c] + s-benzoate coa[c]	benzoyl acetyl-coa[c] + coa[c] <=> acetyl-coa[c] + s-benzoate coa[c]	-1000	1000	0	R05506	Peroxisome_	1
R05586 Peroxisome_	3-oxopimeloyl-coa[c] + coa[c] <==> acetyl-coa[c] + glutaryl-coa[c]	3-oxopimeloyl-coa[c] + coa[c] <=> acetyl-coa[c] + glutaryl-coa[c]	-1000	1000	0	R05586	Peroxisome_	0
R07891 Peroxisome_	acetyl-coa[c] + opc6-coa[c] <==> 3-oxo-opc8-coa[c] + coa[c]	acetyl-coa[c] + opc6-coa[c] <=> 3-oxo-opc8-coa[c] + coa[c]	-1000	1000	0	R07891	Peroxisome_	0
R07895 Peroxisome_	acetyl-coa[c] + opc4-coa[c] <==> 3-oxo-opc6-coa[c] + coa[c]	acetyl-coa[c] + opc4-coa[c] <=> 3-oxo-opc6-coa[c] + coa[c]	-1000	1000	0	R07895	Peroxisome_	0
R07899 Peroxisome_	(+)-7-isojasmonic acid coa[c] + acetyl-coa[c] <==> 3-oxo-opc4-coa[c] + coa[c]	(+)-7-isojasmonic acid coa[c] + acetyl-coa[c] <=> 3-oxo-opc4-coa[c] + coa[c]	-1000	1000	0	R07899	Peroxisome_	1
R07937 Peroxisome_	(4z,7z,10z,13z,16z,19z)-docosahexaenoyl-coa[c] + acetyl-coa[c] <==> (6z,9z,12z,15z,18z,21z)-3-oxotetracosahexa-6,9,12,15,18,21-enoyl-coa[c] + coa[c]	(4z,7z,10z,13z,16z,19z)-docosahexaenoyl-coa[c] + acetyl-coa[c] <=> (6z,9z,12z,15z,18z,21z)-3-oxotetracosahexa-6,9,12,15,18,21-enoyl-coa[c] + coa[c]	-1000	1000	0	R07937	Peroxisome_	1
R07953 Peroxisome_	(4z,7z,10z,13z,16z)-docosapentaenoyl-coa[c] + acetyl-coa[c] <==> (6z,9z,12z,15z,18z)-3-oxotetracosapenta-6,9,12,15,18-enoyl-coa[c] + coa[c]	(4z,7z,10z,13z,16z)-docosapentaenoyl-coa[c] + acetyl-coa[c] <=> (6z,9z,12z,15z,18z)-3-oxotetracosapenta-6,9,12,15,18-enoyl-coa[c] + coa[c]	-1000	1000	0	R07953	Peroxisome_	1
R08091 Peroxisome₇-methyl-3-oxo-6-octenoyl-CoA:acetyl-CoA C-acyltransferase	7-methyl-3-oxo-6-octenoyl-coa[c] + coa[c] <==> 5-methylhex-4-enoyl-coa[c] + acetyl-coa[c]	7-methyl-3-oxo-6-octenoyl-coa[c] + coa[c] <=> 5-methylhex-4-enoyl-coa[c] + acetyl-coa[c]	-1000	1000	0	R08091	Peroxisome₇-methyl-3-oxo-6-octenoyl-CoA:acetyl-CoA C-acyltransferase	1
R08095 Peroxisome₃-methylcrotonyl-CoA:acetyl-CoA C-acyltransferase	5-methyl-3-oxo-4-hexenoyl-coa[c] + coa[c] <==> 3-methylcrotonyl-coa[c] + acetyl-coa[c]	5-methyl-3-oxo-4-hexenoyl-coa[c] + coa[c] <=> 3-methylcrotonyl-coa[c] + acetyl-coa[c]	-1000	1000	0	R08095	Peroxisome₃-methylcrotonyl-CoA:acetyl-CoA C-acyltransferase	0
R04319 Peroxisome_trans-2,3-didehydroacyl-CoA:Natp+ 4-oxidoreductase	natp+[c] + trans-2,3-dehydroacyl-coa[c] <==> h+[c] + natph+[c]+ trans,trans-2,3,4,5-tetradehydroacyl-coa[c]	natp+[c] + trans-2,3-dehydroacyl-coa[c] <=> h+[c] + natph+[c]+ trans,trans-2,3,4,5-tetradehydroacyl-coa[c]	-1000	1000	0	R04319	Peroxisome_trans-2,3-didehydroacyl-CoA:Natp+ 4-oxidoreductase	1
R00390 Peroxisome_Long-chain carboxylate:CoA ligase (AMP-forming)	atp[c] + coa[c] + long-chain carboxylate[c] <==> acyl-coa[c] + amp[c] + diphosphate[c]	atp[c] + coa[c] + long-chain carboxylate[c] <=> acyl-coa[c] + amp[c] + diphosphate[c]	-1000	1000	0	R00390	Peroxisome_Long-chain carboxylate:CoA ligase (AMP-forming)	1
R02245 Peroxisome_atp:(R)-mevalonate 5-phosphotransferase	atp[c] + (r)-mevalonate[c] <==> atp[c] + (r)-5-phosphomevalonate[c]	atp[c] + (r)-mevalonate[c] <=> atp[c] + (r)-5-phosphomevalonate[c]	-1000	1000	0	R02245	Peroxisome_atp:(R)-mevalonate 5-phosphotransferase	1
R08090 Peroxisome_3-hydroxy-3-(4-methylpent-3-en-1-yl)glutaryl-CoA acetate-lyase (7-methyl-3-oxooct-6-enoyl-CoA-forming)	3-hydroxy-3-(4-methylpent-3-en-1-yl)glutaryl-coa[c] <==> 7-methyl-3-oxo-6-octenoyl-coa[c] + Acetate[c] ]	3-hydroxy-3-(4-methylpent-3-en-1-yl)glutaryl-coa[c] <=> 7-methyl-3-oxo-6-octenoyl-coa[c] + Acetate[c] ]	-1000	1000	0	R08090	Peroxisome_3-hydroxy-3-(4-methylpent-3-en-1-yl)glutaryl-CoA acetate-lyase (7-methyl-3-oxooct-6-enoyl-CoA-forming)	1
R01341 Peroxisome₍S)-2-Hydroxy-acid:oxygen 2-oxidoreductase	oxygen[c] + (s)-2-hydroxyacid[c] <==> 2-oxo acid[c] + hydrogen peroxide[c]	oxygen[c] + (s)-2-hydroxyacid[c] <=> 2-oxo acid[c] + hydrogen peroxide[c]	-1000	1000	0	R01341	Peroxisome₍S)-2-Hydroxy-acid:oxygen 2-oxidoreductase	1
R00475 Peroxisome_glycolate:oxygen 2-oxidoreductase	glycolate[c] + oxygen[c] <==> glyoxylate[c] + hydrogen peroxide[c]	glycolate[c] + oxygen[c] <=> glyoxylate[c] + hydrogen peroxide[c]	-1000	1000	0	R00475	Peroxisome_glycolate:oxygen 2-oxidoreductase	1
R00602 Peroxisome_methanol:hydrogen-peroxide oxidoreductase	hydrogen peroxide[c] + methanol[c] <==> formaldehyde[c] + (2) h2o[c]	hydrogen peroxide[c] + methanol[c] <=> formaldehyde[c] + (2) h2o[c]	-1000	1000	0	R00602	Peroxisome_methanol:hydrogen-peroxide oxidoreductase	1
R02670 Peroxisome_	(2) 3-hydroxyanthranilate[c] + (4) oxygen[c] <==> cinnavalininate[c] + (2) h+[c] + (2) hydrogen peroxide[c] + (2) o2.-[c]	(2) 3-hydroxyanthranilate[c] + (4) oxygen[c] <=> cinnavalininate[c] + (2) h+[c] + (2) hydrogen peroxide[c] + (2) o2.-[c]	-1000	1000	0	R02670	Peroxisome_	1
R00275 Peroxisome_superoxide:superoxide oxidoreductase	(2) h+[c] + (2) oxygen[c] <==> hydrogen peroxide[c] + oxygen[c]	(2) h+[c] + (2) oxygen[c] <=> hydrogen peroxide[c] + oxygen[c]	-1000	1000	0	R00275	Peroxisome_superoxide:superoxide oxidoreductase	0
R04729 Peroxisome₍2S)-2-Methylacyl-CoA 2-epimerase	(2s)-2-methylacyl-coa[c] <==> (2r)-2-methylacyl-coa[c]	(2s)-2-methylacyl-coa[c] <=> (2r)-2-methylacyl-coa[c]	-1000	1000	0	R04729	Peroxisome₍2S)-2-Methylacyl-CoA 2-epimerase	1
R08734 Peroxisome_3alpha,7alpha,12alpha-trihydroxy-5beta-cholestan-26-oyl-CoA 25-epimerase	(25r)-3alpha,7alpha,12alpha-trihydroxy-5beta-cholestan-26-oyl-coa[c] <==> (25s)-3alpha,7alpha,12alpha-trihydroxy-5beta-cholestan-26-oyl-coa[c]	(25r)-3alpha,7alpha,12alpha-trihydroxy-5beta-cholestan-26-oyl-coa[c] <=> (25s)-3alpha,7alpha,12alpha-trihydroxy-5beta-cholestan-26-oyl-coa[c]	-1000	1000	0	R08734	Peroxisome_3alpha,7alpha,12alpha-trihydroxy-5beta-cholestan-26-oyl-CoA 25-epimerase	1
R08739 Peroxisome_3alpha,7alpha-dihydroxy-5beta-cholestanoyl-CoA 25-epimerase	(25r)-3alpha,7alpha-dihydroxy-5beta-cholestanoyl-coa[c] <==> (25s)-3alpha,7alpha-dihydroxy-5beta-cholestanoyl-coa[c]	(25r)-3alpha,7alpha-dihydroxy-5beta-cholestanoyl-coa[c] <=> (25s)-3alpha,7alpha-dihydroxy-5beta-cholestanoyl-coa[c]	-1000	1000	0	R08739	Peroxisome_3alpha,7alpha-dihydroxy-5beta-cholestanoyl-CoA 25-epimerase	1
R00388 Peroxisome_Acyl-CoA:oxygen 2-oxidoreductase	acyl-coa[c] + oxygen[c] <==> hydrogen peroxide[c] + trans-2,3-dehydroacyl-coa[c]	acyl-coa[c] + oxygen[c] <=> hydrogen peroxide[c] + trans-2,3-dehydroacyl-coa[c]	-1000	1000	0	R00388	Peroxisome_Acyl-CoA:oxygen 2-oxidoreductase	0
R01175 Peroxisome_butanoyl-CoA:electron-transfer flavoprotein 2,3-oxidoreductase	butanoyl-coa[c] + fad[c] <==> crotonoyl-coa[c] + fadh2[c]	butanoyl-coa[c] + fad[c] <=> crotonoyl-coa[c] + fadh2[c]	-1000	1000	0	R01175	Peroxisome_butanoyl-CoA:electron-transfer flavoprotein 2,3-oxidoreductase	0
R01279 Peroxisome_palmitoyl-CoA:electron-transfer flavoprotein 2,3-oxidoreductase	fad[c] + palmitoyl-coa[c] <==> fadh2[c] + trans-hexadec-2-enoyl-coa[c]	fad[c] + palmitoyl-coa[c] <=> fadh2[c] + trans-hexadec-2-enoyl-coa[c]	-1000	1000	0	R01279	Peroxisome_palmitoyl-CoA:electron-transfer flavoprotein 2,3-oxidoreductase	0
R03777 Peroxisome_octanoyl-CoA:electron-transfer flavoprotein 2-oxidoreductase	fad[c] + octanoyl-coa[c] <==> fadh2[c] + trans-oct-2-enoyl-coa[c]	fad[c] + octanoyl-coa[c] <=> fadh2[c] + trans-oct-2-enoyl-coa[c]	-1000	1000	0	R03777	Peroxisome_octanoyl-CoA:electron-transfer flavoprotein 2-oxidoreductase	0
R03857 Peroxisome_lauroyl-CoA:electron-transfer flavoprotein 2,3-oxidoreductase	fad[c] + lauroyl-coa[c] <==> 2-trans-dodecenoyl-coa[c] + fadh2[c]	fad[c] + lauroyl-coa[c] <=> 2-trans-dodecenoyl-coa[c] + fadh2[c]	-1000	1000	0	R03857	Peroxisome_lauroyl-CoA:electron-transfer flavoprotein 2,3-oxidoreductase	0
R03990 Peroxisome_tetradecanoyl-CoA:electron-transfer flavoprotein 2,3-oxidoreductase	fad[c] + tetradecanoyl-coa[c] <==> fadh2[c] + trans-tetradec-2-enoyl-coa[c]	fad[c] + tetradecanoyl-coa[c] <=> fadh2[c] + trans-tetradec-2-enoyl-coa[c]	-1000	1000	0	R03990	Peroxisome_tetradecanoyl-CoA:electron-transfer flavoprotein 2,3-oxidoreductase	0
R04751 Peroxisome_hexanoyl-CoA:electron-transfer flavoprotein 2,3-oxidoreductase	fad[c] + hexanoyl-coa[c] <==> fadh2[c] + trans-hex-2-enoyl-coa[c]	fad[c] + hexanoyl-coa[c] <=> fadh2[c] + trans-hex-2-enoyl-coa[c]	-1000	1000	0	R04751	Peroxisome_hexanoyl-CoA:electron-transfer flavoprotein 2,3-oxidoreductase	0
R04754 Peroxisome_decanoyl-CoA:electron-transfer flavoprotein 2,3-oxidoreductase	decanoyl-coa[c] + fad[c] <==> fadh2[c] + trans-dec-2-enoyl-coa[c]	decanoyl-coa[c] + fad[c] <=> fadh2[c] + trans-dec-2-enoyl-coa[c]	-1000	1000	0	R04754	Peroxisome_decanoyl-CoA:electron-transfer flavoprotein 2,3-oxidoreductase	0
R07888 Peroxisome_	fad[c] + opc8-coa[c] <==> fadh2[c] + trans-2-enoyl-opc8-coa[c]	fad[c] + opc8-coa[c] <=> fadh2[c] + trans-2-enoyl-opc8-coa[c]	-1000	1000	0	R07888	Peroxisome_	1
R07892 Peroxisome_	fad[c] + opc6-coa[c] <==> fadh2[c] + trans-2-enoyl-opc6-coa[c]	fad[c] + opc6-coa[c] <=> fadh2[c] + trans-2-enoyl-opc6-coa[c]	-1000	1000	0	R07892	Peroxisome_	0
R07896 Peroxisome_	fad[c] + opc4-coa[c] <==> fadh2[c] + trans-2-enoyl-opc4-coa[c]	fad[c] + opc4-coa[c] <=> fadh2[c] + trans-2-enoyl-opc4-coa[c]	-1000	1000	0	R07896	Peroxisome_	0
R07934 Peroxisome_	(6z,9z,12z,15z,18z,21z)-tetracosahexaenoyl-coa[c] + fad[c] <==> (2e,6z,9z,12z,15z,18z,21z)-tetracosahepta-2,6,9,12,15,18,21-enoyl-coa[c] + fadh2[c]	(6z,9z,12z,15z,18z,21z)-tetracosahexaenoyl-coa[c] + fad[c] <=> (2e,6z,9z,12z,15z,18z,21z)-tetracosahepta-2,6,9,12,15,18,21-enoyl-coa[c] + fadh2[c]	-1000	1000	0	R07934	Peroxisome_	1
R07950 Peroxisome_	(6z,9z,12z,15z,18z)-tetracosapentaenoyl-coa[c] + fad[c] <==> (2e,6z,9z,12z,15z,18z)-tetracosahexa-2,6,9,12,15,18-enoyl-coa[c] + fadh2[c]	(6z,9z,12z,15z,18z)-tetracosapentaenoyl-coa[c] + fad[c] <=> (2e,6z,9z,12z,15z,18z)-tetracosahexa-2,6,9,12,15,18-enoyl-coa[c] + fadh2[c]	-1000	1000	0	R07950	Peroxisome_	1
R03744 Insulin resistance_atp:tau-protein O-phosphotransferase	atp[c] + tau-protein[c] <==> atp[c] + o-phospho-tau-protein[c]	atp[c] + tau-protein[c] <=> atp[c] + o-phospho-tau-protein[c]	-1000	1000	0	R03744	Insulin resistance_atp:tau-protein O-phosphotransferase	1
R01821 Insulin resistance_1,4-alpha-D-Glucan:orthophosphate alpha-D-glucosyltransferase	amylose[c] + orthophosphate[c] <==> amylose[c] + d-glucose 1-phosphate[c]	amylose[c] + orthophosphate[c] <=> amylose[c] + d-glucose 1-phosphate[c]	-1000	1000	0	R01821	Insulin resistance_1,4-alpha-D-Glucan:orthophosphate alpha-D-glucosyltransferase	0
R06050 Insulin resistance_1,4-alpha-D-glucan:phosphate alpha-D-glucosyltransferase	1,4-alpha-d-glucan(n)[c] + orthophosphate[c] <==> 1,4-alpha-d-glucan(n-1)[c] + d-glucose 1-phosphate[c]	1,4-alpha-d-glucan(n)[c] + orthophosphate[c] <=> 1,4-alpha-d-glucan(n-1)[c] + d-glucose 1-phosphate[c]	-1000	1000	0	R06050	Insulin resistance_1,4-alpha-D-glucan:phosphate alpha-D-glucosyltransferase	1
R02111 Insulin resistance_1,4-alpha-D-Glucan:orthophosphate alpha-D-glucosyltransferase	orthophosphate[c] + starch+[c]<==> amylose[c] + d-glucose 1-phosphate[c]	orthophosphate[c] + starch+[c]<=> amylose[c] + d-glucose 1-phosphate[c]	-1000	1000	0	R02111	Insulin resistance_1,4-alpha-D-Glucan:orthophosphate alpha-D-glucosyltransferase	0
R06185 Insulin resistance	orthophosphate[c] + starch+[c]<==> 1,4-alpha-d-glucan[c] + d-glucose 1-phosphate[c]	orthophosphate[c] + starch+[c]<=> 1,4-alpha-d-glucan[c] + d-glucose 1-phosphate[c]	-1000	1000	0	R06185	Insulin resistance	1
R03363 Insulin resistance₁-Phosphatidyl-1D-myo-inositol 3-phosphate 3-phosphohydrolase	1-phosphatidyl-1d-myo-inositol 3-phosphate + h2o <=> 1-phosphatidyl-d-myo-inositol + orthophosphate	1-phosphatidyl-1d-myo-inositol 3-phosphate + h2o <=> 1-phosphatidyl-d-myo-inositol + orthophosphate	-1000	1000	0	R03363	Insulin resistance₁-Phosphatidyl-1D-myo-inositol 3-phosphate 3-phosphohydrolase	1
EX_4abut(e)	4abut[e] <==>	4abut[e] <=>	-10	1000	0		4-Aminobutanoate exchange	0
EX_ac(e)	ac[e] <==>	ac[e] <=>	-10	1000	0		Acetate exchange	0
EX_acon-C(e)	acon-C[e] <==>	acon-C[e] <=>	-10	1000	0		cis-Aconitate exchange	0
EX_akg(e)	akg[e] <==>	akg[e] <=>	-10	1000	0		2-Oxoglutarate exchange	0
EX_ala-L(e)	ala-L[e] <==>	ala-L[e] <=>	-10	1000	0		L-Alanine exchange	0
EX_asp-L(e)	asp-L[e] <==>	asp-L[e] <=>	-10	1000	0		L-Aspartate exchange	0
EX_chol(e)	chol[e] <==>	chol[e] <=>	-10	1000	0		Choline exchange	0
EX_cit(e)	cit[e] <==>	cit[e] <=>	-10	1000	0		Citrate exchange	0
EX_co2(e)	co2[e] <==>	co2[e] <=>	-10	1000	0		CO2 exchange	0
EX_cys-L(e)	cys-L[e] <==>	cys-L[e] <=>	-10	1000	0		L-Cysteine exchange	0
EX_fe2(e)	fe2[e] <==>	fe2[e] <=>	-10	1000	0		Fe2+ exchange	0
EX_fru(e)	fru[e] <==>	fru[e] <=>	-10	1000	0		D-Fructose exchange	0
EX_fum(e)	fum[e] <==>	fum[e] <=>	-10	1000	0		Fumarate exchange	0
EX_glc(e)	glc-D[e] <==>	glc-D[e] <=>	-10	1000	0		D-Glucose exchange	0
EX_glu-L(e)	glu-L[e] <==>	glu-L[e] <=>	-10	1000	0		L-Glutamate exchange	0
EX_gly(e)	gly[e] <==>	gly[e] <=>	-10	1000	0		Glycine exchange	0
EX_glyald(e)	glyald[e] <==>	glyald[e] <=>	-10	1000	0		D-Glyceraldehyde exchange	0
EX_glyc(e)	glyc[e] <==>	glyc[e] <=>	-10	1000	0		Glycerol exchange	0
EX_glyclt(e)	glyclt[e] <==>	glyclt[e] <=>	-10	1000	0		Glycolate exchange	0
EX_h(e)	h[e] <==>	h[e] <=>	-10	1000	0		H+ exchange	0
EX_h2(e)	h2[e] <==>	h2[e] <=>	-10	1000	0		H2 exchange	0
EX_h2o(e)	h2o[e] <==>	h2o[e] <=>	-10	1000	0		H2O exchange	0
EX_icit(e)	icit[e] <==>	icit[e] <=>	-10	1000	0		Isocitrate exchange	0
EX_ile-L(e)	ile-L[e] <==>	ile-L[e] <=>	-10	1000	0		L-Isoleucine exchange	0
EX_isetac(e)	isetac[e] <==>	isetac[e] <=>	-10	1000	0		Isethionic acid exchange	0
EX_leu-L(e)	leu-L[e] <==>	leu-L[e] <=>	-10	1000	0		L-Leucine exchange	0
EX_lys-L(e)	lys-L[e] <==>	lys-L[e] <=>	-10	1000	0		L-Lysine exchange	0
EX_met-L(e)	met-L[e] <==>	met-L[e] <=>	-10	1000	0		L-Methionine exchange	0
EX_nac(e)	nac[e] <==>	nac[e] <=>	-10	1000	0		Nicotinate exchange	0
EX_nh4(e)	nh4[e] <==>	nh4[e] <=>	-10	1000	0		Ammonia exchange	0
EX_o2(e)	o2[e] <==>	o2[e] <=>	-10	1000	0		O2 exchange	0
EX_orn(e)	orn[e] <==>	orn[e] <=>	-10	1000	0		Ornithine exchange	0
EX_phe-L(e)	phe-L[e] <==>	phe-L[e] <=>	-10	1000	0		L-Phenylalanine exchange	0
EX_pi(e)	pi[e] <==>	pi[e] <=>	-10	1000	0		Phosphate exchange	0
EX_pro-L(e)	pro-L[e] <==>	pro-L[e] <=>	-10	1000	0		L-Proline exchange	0
EX_ptrc(e)	ptrc[e] <==>	ptrc[e] <=>	-10	1000	0		Putrescine exchange	0
EX_rib-D(e)	rib-D[e] <==>	rib-D[e] <=>	-10	1000	0		D-Ribose exchange	0
EX_ser-L(e)	ser-L[e] <==>	ser-L[e] <=>	-10	1000	0		L-Serine exchange	0
EX_so4(e)	so4[e] <==>	so4[e] <=>	-10	1000	0		Sulfate exchange	0
EX_spmd(e)	spmd[e] <==>	spmd[e] <=>	-10	1000	0		Spermidine exchange	0
EX_succ(e)	succ[e] <==>	succ[e] <=>	-10	1000	0		Succinate exchange	0
EX_taur(e)	taur[e] <==>	taur[e] <=>	-10	1000	0		Taurine exchange	0
EX_thr-L(e)	thr-L[e] <==>	thr-L[e] <=>	-10	1000	0		L-Threonine exchange	0
EX_tsul(e)	tsul[e] <==>	tsul[e] <=>	-10	1000	0		Thiosulfate exchange	0
EX_tyr-L(e)	tyr-L[e] <==>	tyr-L[e] <=>	-10	1000	0		L-Tyrosine exchange	0
EX_val-L(e)	val-L[e] <==>	val-L[e] <=>	-10	1000	0		L-Valine exchange	0
EX05852	2hyoxplac[e] <==>	2hyoxplac[e] <=>	-10	1000	0		2-Hydroxyphenylacetate exchange	0
EX00355	34dhphe[e] <==>	34dhphe[e] <=>	-10	1000	0		3,4-Dihydroxy-L-phenylalanine exchange	0
EX05635	5hoxindoa[e] <==>	5hoxindoa[e] <=>	-10	1000	0		5-Hydroxyindoleacetate exchange	0
EX00164	acac[e] <==>	acac[e] <=>	-10	1000	0		Acetoacetate exchange	0
EX00084	acald[e] <==>	acald[e] <=>	-10	1000	0		Acetaldehyde exchange	0
EX01132	acgal[e] <==>	acgal[e] <=>	-10	1000	0		N-Acetyl-D-galactosamine exchange	0
EX00979	acser[e] <==>	acser[e] <=>	-10	1000	0		O-Acetyl-L-serine exchange	0
EX00147	ade[e] <==>	ade[e] <=>	-10	1000	0		Adenine exchange	0
EX00212	adn[e] <==>	adn[e] <=>	-10	1000	0		Adenosine exchange	0
EX00099	ala-B[e] <==>	ala-B[e] <=>	-10	1000	0		beta-Alanine exchange	0
EX00133	ala-D[e] <==>	ala-D[e] <=>	-10	1000	0		D-Alanine exchange	0
EX00019	amet[e] <==>	amet[e] <=>	-10	1000	0		S-Adenosyl-L-methionine exchange	0
EX00020	amp[e] <==>	amp[e] <=>	-10	1000	0		AMP excretion	0
EX00259	arab-L[e] <==>	arab-L[e] <=>	-10	1000	0		L-Arabinose exchange	0
EX00219	arachd[e] <==>	arachd[e] <=>	-10	1000	0		arachidonic acid exchange	0
EX00152	asn-L[e] <==>	asn-L[e] <=>	-10	1000	0		L-Asparagine exchange	0
EX01419	cgly[e] <==>	cgly[e] <=>	-10	1000	0		Cys-Gly exchange	0
EX00187	chsterol[e] <==>	chsterol[e] <=>	-10	1000	0		Cholesterol exchange	0
EX01326	cyan[e] <==>	cyan[e] <=>	-10	1000	0		Hydrogen cyanide exchange	0
EX00475	cytd[e] <==>	cytd[e] <=>	-10	1000	0		Cytidine exchange	0
EX00559	dad-2[e] <==>	dad-2[e] <=>	-10	1000	0		Deoxyadenosine exchange	0
EX00881	dcyt[e] <==>	dcyt[e] <=>	-10	1000	0		Deoxycytidine exchange	0
EX00330	dgsn[e] <==>	dgsn[e] <=>	-10	1000	0		Deoxyguanosine exchange	0
EX03758	dopa[e] <==>	dopa[e] <=>	-10	1000	0		Dopamine exchange	0
EX00459	dttp[e] <==>	dttp[e] <=>	-10	1000	0		dTTP exchange	0
EX00526	duri[e] <==>	duri[e] <=>	-10	1000	0		Deoxyuridine exchange	0
EX00469	etoh[e] <==>	etoh[e] <=>	-10	1000	0		Ethanol exchange	0
EX00504	fol[e] <==>	fol[e] <=>	-10	1000	0		Folate exchange	0
EX00124	gal[e] <==>	gal[e] <=>	-10	1000	0		D-Galactose exchange	0
EX00329	gam[e] <==>	gam[e] <=>	-10	1000	0		D-Glucosamine exchange	0
EX00352	gam6p[e] <==>	gam6p[e] <=>	-10	1000	0		D-Glucosamine 6-phosphate exchange	0
EX03272	gbside[e] <==>	gbside[e] <=>	-10	1000	0		globoside exchange	0
EX00266	gcald[e] <==>	gcald[e] <=>	-10	1000	0		Glycolaldehyde exchange	0
EX00818	glcr[e] <==>	glcr[e] <=>	-10	1000	0		D-Glucarate exchange	0
EX00191	glcur[e] <==>	glcur[e] <=>	-10	1000	0		D-Glucuronate exchange	0
EX00064	gln-L[e] <==>	gln-L[e] <=>	-10	1000	0		L-Glutamine exchange	0
EX00387	gsn[e] <==>	gsn[e] <=>	-10	1000	0		Guanosine exchange	0
EX00027	hydrogen peroxide[e] <==>	hydrogen peroxide[e] <=>	-10	1000	0		hydrogen peroxide exchange	0
EX00388	hista[e] <==>	hista[e] <=>	-10	1000	0		Histamine exchange	0
EX00954	ind3ac[e] <==>	ind3ac[e] <=>	-10	1000	0		Indole-3-acetate exchange	0
EX00137	inost[e] <==>	inost[e] <=>	-10	1000	0		myo-Inositol exchange	0
EX00294	ins[e] <==>	ins[e] <=>	-10	1000	0		Inosine exchange	0
EX00243	lcts[e] <==>	lcts[e] <=>	-10	1000	0		Lactose exchange	0
EX01595	lnlc[e] <==>	lnlc[e] <=>	-10	1000	0		linoleic acid (all cis C18:2) n-6 exchange	0
EX00208	malt[e] <==>	malt[e] <=>	-10	1000	0		Maltose exchange	0
EX00159	man[e] <==>	man[e] <=>	-10	1000	0		D-Mannose exchange	0
EX05402	melib[e] <==>	melib[e] <=>	-10	1000	0		Melibiose exchange	0
EX00132	meoh[e] <==>	meoh[e] <=>	-10	1000	0		Methanol exchange	0
EX05127	mhista[e] <==>	mhista[e] <=>	-10	1000	0		N-Methylhistamine exchange	0
EX00546	mthgxl[e] <==>	mthgxl[e] <=>	-10	1000	0		Methylglyoxal exchange	0
EX00153	ncam[e] <==>	ncam[e] <=>	-10	1000	0		Nicotinamide exchange	0
EX00455	nmn[e] <==>	nmn[e] <=>	-10	1000	0		NMN exchange	0
EX00054	pap[e] <==>	pap[e] <=>	-10	1000	0		Adenosine 3',5'-bisphosphate exchange	0
EX00157	pchol[e] <==>	pchol[e] <=>	-10	1000	0		Phosphatidylcholine exchange	0
EX00350	pe[e] <==>	pe[e] <=>	-10	1000	0		Phosphatidylethanolamine exchange	0
EX05332	peamn[e] <==>	peamn[e] <=>	-10	1000	0		Phenethylamine exchange	0
EX00012	pepd[e] <==>	pepd[e] <=>	-10	1000	0		Peptide exchange	0
EX00032	pheme[e] <==>	pheme[e] <=>	-10	1000	0		Protoheme exchange	0
EX00534	pydam[e] <==>	pydam[e] <=>	-10	1000	0		pyridoxamine exchange/defecation	0
EX00250	pydx[e] <==>	pydx[e] <=>	-10	1000	0		pyridoxal exchange/defecation	0
EX00314	pydxn[e] <==>	pydxn[e] <=>	-10	1000	0		pyridoxine exchange/defecation	0
EX00022	pyr[e] <==>	pyr[e] <=>	-10	1000	0		Pyruvate exchange	0
EX00794	sbt-D[e] <==>	sbt-D[e] <=>	-10	1000	0		D-Sorbitol exchange	0
EX02076	sedh[e] <==>	sedh[e] <=>	-10	1000	0		sedoheptulose exchange	0
EX05688	selcys[e] <==>	selcys[e] <=>	-10	1000	0		Selenocysteine exchange	0
EX05335	selmeth[e] <==>	selmeth[e] <=>	-10	1000	0		Selenomethionine exchange	0
EX01120	sph1p[e] <==>	sph1p[e] <=>	-10	1000	0		Sphinganine 1-phosphate exchange	0
EX00780	srtn[e] <==>	srtn[e] <=>	-10	1000	0		Serotonin exchange	0
EX01613	stachyose[e] <==>	stachyose[e] <=>	-10	1000	0		Stachyose exchange	0
EX00089	sucr[e] <==>	sucr[e] <=>	-10	1000	0		Sucrose exchange	0
EX01755	tcynt[e] <==>	tcynt[e] <=>	-10	1000	0		Thiocyanate exchange	0
EX00101	thf[e] <==>	thf[e] <=>	-10	1000	0		5,6,7,8-Tetrahydrofolate exchange	0
EX00378	thm[e] <==>	thm[e] <=>	-10	1000	0		thiamine exchange	0
EX00178	thym[e] <==>	thym[e] <=>	-10	1000	0		Thymine exchange	0
EX00214	thymd[e] <==>	thymd[e] <=>	-10	1000	0		Thymidine exchange	0
EX01083	tre[e] <==>	tre[e] <=>	-10	1000	0		Trehalose exchange	0
EX00078	trp-L[e] <==>	trp-L[e] <=>	-10	1000	0		L-Tryptophan exchange	0
EX00106	ura[e] <==>	ura[e] <=>	-10	1000	0		Uracil exchange	0
EX00299	uri[e] <==>	uri[e] <=>	-10	1000	0		Uridine exchange	0
EX01762	xtsn[e] <==>	xtsn[e] <=>	-10	1000	0		Xanthosine exchange	0
EX00181	xyl-D[e] <==>	xyl-D[e] <=>	-10	1000	0		D-Xylose exchange	0
Transport_4abut(e)	4abut[c] <==> 4abut[e]	4abut[c] <=> 4abut[e]	-1000	1000	0		4-Aminobutanoate transport	1
Transport_Acetate(e)	Acetate[c] <==> Acetate[e]	Acetate[c] <=> Acetate[e]	-1000	1000	0		Acetate transport	0
Transport_acon-C(e)	acon-C[c] <==> acon-C[e]	acon-C[c] <=> acon-C[e]	-1000	1000	0		cis-Aconitate transport	1
Transport_akg(e)	akg[c] <==> akg[e]	akg[c] <=> akg[e]	-1000	1000	0		2-Oxoglutarate transport	1
Transport_ala-L(e)	ala-L[c] <==> ala-L[e]	ala-L[c] <=> ala-L[e]	-1000	1000	0		L-Alanine transport	0
Transport_asp-L(e)	asp-L[c] <==> asp-L[e]	asp-L[c] <=> asp-L[e]	-1000	1000	0		L-Aspartate transport	0
Transport_bz(e)	bz[c] <==> bz[e]	bz[c] <=> bz[e]	-1000	1000	0		Benzoate transport	1
Transport_chol(e)	chol[c] <==> chol[e]	chol[c] <=> chol[e]	-1000	1000	0		Choline transport	1
Transport_cit(e)	cit[c] <==> cit[e]	cit[c] <=> cit[e]	-1000	1000	0		Citrate transport	1
Transport_co2(e)	co2[c] <==> co2[e]	co2[c] <=> co2[e]	-1000	1000	0		CO2 transport	0
Transport_cys-L(e)	cys-L[c] <==> cys-L[e]	cys-L[c] <=> cys-L[e]	-1000	1000	0		L-Cysteine transport	0
Transport_fe2(e)	fe2[c] <==> fe2[e]	fe2[c] <=> fe2[e]	-1000	1000	0		Fe2+ transport	1
Transport_fru(e)	fru[c] <==> fru[e]	fru[c] <=> fru[e]	-1000	1000	0		D-Fructose transport	1
Transport_fum(e)	fum[c] <==> fum[e]	fum[c] <=> fum[e]	-1000	1000	0		Fumarate transport	1
Transport_glc(e)	glc-D[c] <==> glc-D[e]	glc-D[c] <=> glc-D[e]	-1000	1000	0		D-Glucose transport	1
Transport_glu-L(e)	glu-L[c] <==> glu-L[e]	glu-L[c] <=> glu-L[e]	-1000	1000	0		L-Glutamate transport	0
Transport_gly(e)	gly[c] <==> gly[e]	gly[c] <=> gly[e]	-1000	1000	0		Glycine transport	0
Transport_glyald(e)	glyald[c] <==> glyald[e]	glyald[c] <=> glyald[e]	-1000	1000	0		D-Glyceraldehyde transport	1
Transport_glyc(e)	glyc[c] <==> glyc[e]	glyc[c] <=> glyc[e]	-1000	1000	0		Glycerol transport	0
Transport_glyclt(e)	glyclt[c] <==> glyclt[e]	glyclt[c] <=> glyclt[e]	-1000	1000	0		Glycolate transport	1
Transport_h(e)	h+[c]<==> h[e]	h+[c]<=> h[e]	-1000	1000	0		H+ transport	0
Transport_h2(e)	h2[c] <==> h2[e]	h2[c] <=> h2[e]	-1000	1000	0		H2 transport	1
Transport_h2o(e)	h2o[c] <==> h2o[e]	h2o[c] <=> h2o[e]	-1000	1000	0		H2O transport	0
Transport_icit(e)	icit[c] <==> icit[e]	icit[c] <=> icit[e]	-1000	1000	0		Isocitrate transport	1
Transport_ile-L(e)	ile-L[c] <==> ile-L[e]	ile-L[c] <=> ile-L[e]	-1000	1000	0		L-Isoleucine transport	0
Transport_isetac(e)	isetac[c] <==> isetac[e]	isetac[c] <=> isetac[e]	-1000	1000	0		Isethionic acid transport	1
Transport_leu-L(e)	leu-L[c] <==> leu-L[e]	leu-L[c] <=> leu-L[e]	-1000	1000	0		L-Leucine transport	0
Transport_lys-L(e)	lys-L[c] <==> lys-L[e]	lys-L[c] <=> lys-L[e]	-1000	1000	0		L-Lysine transport	0
Transport_met-L(e)	met-L[c] <==> met-L[e]	met-L[c] <=> met-L[e]	-1000	1000	0		L-Methionine transport	0
Transport_nac(e)	nac[c] <==> nac[e]	nac[c] <=> nac[e]	-1000	1000	0		Nicotinate transport	1
Transport_nh4(e)	nh4[c] <==> nh4[e]	nh4[c] <=> nh4[e]	-1000	1000	0		Ammonia transport	1
Transport_o2(e)	o2[c] <==> o2[e]	o2[c] <=> o2[e]	-1000	1000	0		O2 transport	1
Transport_orn(e)	orn[c] <==> orn[e]	orn[c] <=> orn[e]	-1000	1000	0		Ornithine transport	1
Transport_phe-L(e)	phe-L[c] <==> phe-L[e]	phe-L[c] <=> phe-L[e]	-1000	1000	0		L-Phenylalanine transport	0
Transport_pi(e)	pi[c] <==> pi[e]	pi[c] <=> pi[e]	-1000	1000	0		Phosphate transport	0
Transport_pro-L(e)	pro-L[c] <==> pro-L[e]	pro-L[c] <=> pro-L[e]	-1000	1000	0		L-Proline transport	0
Transport_ptrc(e)	ptrc[c] <==> ptrc[e]	ptrc[c] <=> ptrc[e]	-1000	1000	0		Putrescine transport	1
Transport_rib-D(e)	rib-D[c] <==> rib-D[e]	rib-D[c] <=> rib-D[e]	-1000	1000	0		D-Ribose transport	1
Transport_ser-L(e)	ser-L[c] <==> ser-L[e]	ser-L[c] <=> ser-L[e]	-1000	1000	0		L-Serine transport	0
Transport_so4(e)	so4[c] <==> so4[e]	so4[c] <=> so4[e]	-1000	1000	0		Sulfate transport	1
Transport_spmd(e)	spmd[c] <==> spmd[e]	spmd[c] <=> spmd[e]	-1000	1000	0		Spermidine transport	1
Transport_succ(e)	succ[c] <==> succ[e]	succ[c] <=> succ[e]	-1000	1000	0		Succinate transport	1
Transport_taur(e)	taur[c] <==> taur[e]	taur[c] <=> taur[e]	-1000	1000	0		Taurine transport	1
Transport_thr-L(e)	thr-L[c] <==> thr-L[e]	thr-L[c] <=> thr-L[e]	-1000	1000	0		L-Threonine transport	0
Transport_tsul(e)	tsul[c] <==> tsul[e]	tsul[c] <=> tsul[e]	-1000	1000	0		Thiosulfate transport	1
Transport_tyr-L(e)	tyr-L[c] <==> tyr-L[e]	tyr-L[c] <=> tyr-L[e]	-1000	1000	0		L-Tyrosine transport	0
Transport_val-L(e)	val-L[c] <==> val-L[e]	val-L[c] <=> val-L[e]	-1000	1000	0		L-Valine transport	0
Transport05852	2hyoxplac[c] <==> 2hyoxplac[e]	2hyoxplac[c] <=> 2hyoxplac[e]	-1000	1000	0		2-Hydroxyphenylacetate transport	1
Transport00355	34dhphe[c] <==> 34dhphe[e]	34dhphe[c] <=> 34dhphe[e]	-1000	1000	0		3,4-Dihydroxy-L-phenylalanine transport	1
Transport05635	5hoxindoa[c] <==> 5hoxindoa[e]	5hoxindoa[c] <=> 5hoxindoa[e]	-1000	1000	0		5-Hydroxyindoleacetate transport	1
Transport00164	acac[c] <==> acac[e]	acac[c] <=> acac[e]	-1000	1000	0		Acetoacetate transport	1
Transport00084	acald[c] <==> acald[e]	acald[c] <=> acald[e]	-1000	1000	0		Acetaldehyde transport	1
Transport01132	acgal[c] <==> acgal[e]	acgal[c] <=> acgal[e]	-1000	1000	0		N-Acetyl-D-galactosamine transport	1
Transport00979	acser[c] <==> acser[e]	acser[c] <=> acser[e]	-1000	1000	0		O-Acetyl-L-serine transport	1
Transport00147	ade[c] <==> ade[e]	ade[c] <=> ade[e]	-1000	1000	0		Adenine transport	1
Transport00212	adn[c] <==> adn[e]	adn[c] <=> adn[e]	-1000	1000	0		Adenosine transport	1
Transport00099	ala-B[c] <==> ala-B[e]	ala-B[c] <=> ala-B[e]	-1000	1000	0		beta-Alanine transport	1
Transport00133	ala-D[c] <==> ala-D[e]	ala-D[c] <=> ala-D[e]	-1000	1000	0		D-Alanine transport	1
Transport00019	amet[c] <==> amet[e]	amet[c] <=> amet[e]	-1000	1000	0		S-Adenosyl-L-methionine transport	1
Transport00020	amp[c] <==> amp[e]	amp[c] <=> amp[e]	-1000	1000	0		AMP excretion	0
Transport00259	arab-L[c] <==> arab-L[e]	arab-L[c] <=> arab-L[e]	-1000	1000	0		L-Arabinose transport	0
Transport00219	arachd[c] <==> arachd[e]	arachd[c] <=> arachd[e]	-1000	1000	0		arachidonic acid transport	1
Transport00152	asn-L[c] <==> asn-L[e]	asn-L[c] <=> asn-L[e]	-1000	1000	0		L-Asparagine transport	0
Transport01419	cgly[c] <==> cgly[e]	cgly[c] <=> cgly[e]	-1000	1000	0		Cys-Gly transport	1
Transport00187	chsterol[c] <==> chsterol[e]	chsterol[c] <=> chsterol[e]	-1000	1000	0		Cholesterol transport	1
Transport01326	cyan[c] <==> cyan[e]	cyan[c] <=> cyan[e]	-1000	1000	0		Hydrogen cyanide transport	1
Transport00475	cytd[c] <==> cytd[e]	cytd[c] <=> cytd[e]	-1000	1000	0		Cytidine transport	1
Transport00559	dad-2[c] <==> dad-2[e]	dad-2[c] <=> dad-2[e]	-1000	1000	0		Deoxyadenosine transport	1
Transport00881	dcyt[c] <==> dcyt[e]	dcyt[c] <=> dcyt[e]	-1000	1000	0		Deoxycytidine transport	1
Transport00330	dgsn[c] <==> dgsn[e]	dgsn[c] <=> dgsn[e]	-1000	1000	0		Deoxyguanosine transport	1
Transport03758	dopa[c] <==> dopa[e]	dopa[c] <=> dopa[e]	-1000	1000	0		Dopamine transport	1
Transport00459	dttp[c] <==> dttp[e]	dttp[c] <=> dttp[e]	-1000	1000	0		dTTP transport	0
Transport00526	duri[c] <==> duri[e]	duri[c] <=> duri[e]	-1000	1000	0		Deoxyuridine transport	1
Transport00469	etoh+[c]<==> etoh[e]	etoh+[c]<=> etoh[e]	-1000	1000	0		Ethanol transport	1
Transport00504	fol[c] <==> fol[e]	fol[c] <=> fol[e]	-1000	1000	0		Folate transport	1
Transport00124	gal[c] <==> gal[e]	gal[c] <=> gal[e]	-1000	1000	0		D-Galactose transport	0
Transport00329	gam[c] <==> gam[e]	gam[c] <=> gam[e]	-1000	1000	0		D-Glucosamine transport	1
Transport00352	gam6p[c] <==> gam6p[e]	gam6p[c] <=> gam6p[e]	-1000	1000	0		D-Glucosamine 6-phosphate transport	1
Transport03272	gbside[c] <==> gbside[e]	gbside[c] <=> gbside[e]	-1000	1000	0		globoside transport	1
Transport00266	gcald[c] <==> gcald[e]	gcald[c] <=> gcald[e]	-1000	1000	0		Glycolaldehyde transport	1
Transport00818	glcr[c] <==> glcr[e]	glcr[c] <=> glcr[e]	-1000	1000	0		D-Glucarate transport	1
Transport00191	glcur[c] <==> glcur[e]	glcur[c] <=> glcur[e]	-1000	1000	0		D-Glucuronate transport	1
Transport00064	gln-L[c] <==> gln-L[e]	gln-L[c] <=> gln-L[e]	-1000	1000	0		L-Glutamine transport	0
Transport00387	gsn[c] <==> gsn[e]	gsn[c] <=> gsn[e]	-1000	1000	0		Guanosine transport	1
Transport00027	hydrogen peroxide[c] <==> hydrogen peroxide[e]	hydrogen peroxide[c] <=> hydrogen peroxide[e]	-1000	1000	0		Hydrogen peroxide transport	1
Transport00388	hista[c] <==> hista[e]	hista[c] <=> hista[e]	-1000	1000	0		Histamine transport	1
Transport00954	ind3ac[c] <==> ind3ac[e]	ind3ac[c] <=> ind3ac[e]	-1000	1000	0		Indole-3-acetate transport	1
Transport00137	inost[c] <==> inost[e]	inost[c] <=> inost[e]	-1000	1000	0		myo-Inositol transport	1
Transport00294	ins[c] <==> ins[e]	ins[c] <=> ins[e]	-1000	1000	0		Inosine transport	1
Transport00243	lcts[c] <==> lcts[e]	lcts[c] <=> lcts[e]	-1000	1000	0		Lactose transport	1
Transport01595	lnlc[c] <==> lnlc[e]	lnlc[c] <=> lnlc[e]	-1000	1000	0		linoleic acid (all cis C18:2) n-6 transport	1
Transport00208	malt[c] <==> malt[e]	malt[c] <=> malt[e]	-1000	1000	0		Maltose transport	1
Transport00159	man[c] <==> man[e]	man[c] <=> man[e]	-1000	1000	0		D-Mannose transport	0
Transport05402	melib[c] <==> melib[e]	melib[c] <=> melib[e]	-1000	1000	0		Melibiose transport	1
Transport00132	meoh+[c]<==> meoh[e]	meoh+[c]<=> meoh[e]	-1000	1000	0		Methanol transport	1
Transport05127	mhista[c] <==> mhista[e]	mhista[c] <=> mhista[e]	-1000	1000	0		N-Methylhistamine transport	1
Transport00546	mthgxl[c] <==> mthgxl[e]	mthgxl[c] <=> mthgxl[e]	-1000	1000	0		Methylglyoxal transport	1
Transport00153	ncam[c] <==> ncam[e]	ncam[c] <=> ncam[e]	-1000	1000	0		Nicotinamide transport	1
Transport00455	nmn[c] <==> nmn[e]	nmn[c] <=> nmn[e]	-1000	1000	0		NMN transport	1
Transport00054	pap[c] <==> pap[e]	pap[c] <=> pap[e]	-1000	1000	0		Adenosine 3',5'-bisphosphate transport	1
Transport00157	pchol[c] <==> pchol[e]	pchol[c] <=> pchol[e]	-1000	1000	0		Phosphatidylcholine transport	1
Transport00350	pe[c] <==> pe[e]	pe[c] <=> pe[e]	-1000	1000	0		Phosphatidylethanolamine transport	1
Transport05332	peamn[c] <==> peamn[e]	peamn[c] <=> peamn[e]	-1000	1000	0		Phenethylamine transport	1
Transport00012	pepd[c] <==> pepd[e]	pepd[c] <=> pepd[e]	-1000	1000	0		Peptide transport	1
Transport00032	pheme[c] <==> pheme[e]	pheme[c] <=> pheme[e]	-1000	1000	0		Protoheme transport	1
Transport00534	pydam[c] <==> pydam[e]	pydam[c] <=> pydam[e]	-1000	1000	0		pyridoxamine transport/defecation	1
Transport00250	pydx[c] <==> pydx[e]	pydx[c] <=> pydx[e]	-1000	1000	0		pyridoxal transport/defecation	1
Transport00314	pydxn[c] <==> pydxn[e]	pydxn[c] <=> pydxn[e]	-1000	1000	0		pyridoxine transport/defecation	1
Transport00022	pyr[c] <==> pyr[e]	pyr[c] <=> pyr[e]	-1000	1000	0		Pyruvate transport	1
Transport00794	sbt-D[c] <==> sbt-D[e]	sbt-D[c] <=> sbt-D[e]	-1000	1000	0		D-Sorbitol transport	1
Transport02076	sedh+[c]<==> sedh[e]	sedh+[c]<=> sedh[e]	-1000	1000	0		sedoheptulose transport	1
Transport05688	selcys[c] <==> selcys[e]	selcys[c] <=> selcys[e]	-1000	1000	0		Selenocysteine transport	1
Transport05335	selmeth+[c]<==> selmeth[e]	selmeth+[c]<=> selmeth[e]	-1000	1000	0		Selenomethionine transport	1
Transport01120	sph1p[c] <==> sph1p[e]	sph1p[c] <=> sph1p[e]	-1000	1000	0		Sphinganine 1-phosphate transport	1
Transport00780	srtn[c] <==> srtn[e]	srtn[c] <=> srtn[e]	-1000	1000	0		Serotonin transport	1
Transport01613	stachyose[c] <==> stachyose[e]	stachyose[c] <=> stachyose[e]	-1000	1000	0		Stachyose transport	0
Transport00089	sucr[c] <==> sucr[e]	sucr[c] <=> sucr[e]	-1000	1000	0		Sucrose transport	1
Transport01755	tcynt[c] <==> tcynt[e]	tcynt[c] <=> tcynt[e]	-1000	1000	0		Thiocyanate transport	1
Transport00101	thf[c] <==> thf[e]	thf[c] <=> thf[e]	-1000	1000	0		5,6,7,8-Tetrahydrofolate transport	1
Transport00378	thm[c] <==> thm[e]	thm[c] <=> thm[e]	-1000	1000	0		thiamine transport	1
Transport00178	thym[c] <==> thym[e]	thym[c] <=> thym[e]	-1000	1000	0		Thymine transport	1
Transport00214	thymd[c] <==> thymd[e]	thymd[c] <=> thymd[e]	-1000	1000	0		Thymidine transport	1
Transport01083	tre[c] <==> tre[e]	tre[c] <=> tre[e]	-1000	1000	0		Trehalose transport	1
Transport00078	trp-L[c] <==> trp-L[e]	trp-L[c] <=> trp-L[e]	-1000	1000	0		L-Tryptophan transport	0
Transport00106	ura[c] <==> ura[e]	ura[c] <=> ura[e]	-1000	1000	0		Uracil transport	1
Transport00299	uri[c] <==> uri[e]	uri[c] <=> uri[e]	-1000	1000	0		Uridine transport	1
Transport01762	xtsn[c] <==> xtsn[e]	xtsn[c] <=> xtsn[e]	-1000	1000	0		Xanthosine transport	1
Transport00181	xyl-D[c] <==> xyl-D[e]	xyl-D[c] <=> xyl-D[e]	-1000	1000	0		D-Xylose transport	1
biomass	(0.0370621525868795) Acetate[c] + (0.309071177207791) ala-L[c] + (0.524141412987151) arab-L[c] + (0.0651648675739026) asn-L[c] + (0.0651648675739026) asp-L[c] + (29.9486156158559) atp[c] + (0.104205539299296) ctp[c] + (0.011086650437904) cys-L[c] + (0.00217969321079621) datp[c] + (0.0038750101525266) dctp[c] + (0.0038750101525266) dgtp[c] + (0.00217969321079621) dttp[c] + (0.69699640498975) gal[c…	(0.0370621525868795) Acetate[c] + (0.309071177207791) ala-L[c] + (0.524141412987151) arab-L[c] + (0.0651648675739026) asn-L[c] + (0.0651648675739026) asp-L[c] + (29.9486156158559) atp[c] + (0.104205539299296) ctp[c] + (0.011086650437904) cys-L[c] + (0.00217969321079621) datp[c] + (0.0038750101525266) dctp[c] + (0.0038750101525266) dgtp[c] + (0.00217969321079621) dttp[c] + (0.69699640498975) gal[c…	0.0	1000	1		Biomass derived from iRC1080	0

## Sheet: Reaction List updated
	Rxn Id	Name	Equation	Dscription	lb	ub								For SBML
Rxn	R00009	2 Hydrogen peroxide <=> Oxygen + 2 H2O	2 C00027_c <=> C00007_c + 2 C00001_c	hydrogen-peroxide:hydrogen-peroxide oxidoreductase	-1000	1000								R00009#2 Hydrogen peroxide <=> Oxygen + 2 H2O#2 C00027_c <=> C00007_c + 2 C00001_c#-1000#1000#
	R00022	Chitobiose + H2O <=> 2 N-Acetyl-D-glucosamine	C01674_c + C00001_c <=> 2 C00140_c	chitobiose N-acetylglucosaminohydrolase	-1000	1000								R00022#Chitobiose + H2O <=> 2 N-Acetyl-D-glucosamine#C01674_c + C00001_c <=> 2 C00140_c#-1000#1000#
	R00028	Maltose + H2O <=> 2 alpha-D-Glucose	C00208_c + C00001_c <=> 2 C00267_c	maltose glucohydrolase	-1000	1000								R00028#Maltose + H2O <=> 2 alpha-D-Glucose#C00208_c + C00001_c <=> 2 C00267_c#-1000#1000#
	R00036	2 5-Aminolevulinate <=> Porphobilinogen + 2 H2O	2 C00430_c <=> C00931_c + 2 C00001_c	5-aminolevulinate hydro-lyase (adding 5-aminolevulinate and cyclizing porphobilinogen-forming)	-1000	1000								R00036#2 5-Aminolevulinate <=> Porphobilinogen + 2 H2O#2 C00430_c <=> C00931_c + 2 C00001_c#-1000#1000#
	R00084	4 Porphobilinogen + H2O <=> Hydroxymethylbilane + 4 Ammonia	4 C00931_c + C00001_c <=> C01024_c + 4 C00014_c	porphobilinogen:(4-[2-carboxyethyl]-3-[carboxymethyl]pyrrol-2-yl)methyltransferase (hydrolysing)	-1000	1000								R00084#4 Porphobilinogen + H2O <=> Hydroxymethylbilane + 4 Ammonia#4 C00931_c + C00001_c <=> C01024_c + 4 C00014_c#-1000#1000#
	R00086	ATP + H2O <=> ADP + Orthophosphate	C00002_c + C00001_c <=> C00008_c + C00009_c	ATP phosphohydrolase	-1000	1000								R00086#ATP + H2O <=> ADP + Orthophosphate#C00002_c + C00001_c <=> C00008_c + C00009_c#-1000#1000#
	R00100	NADH + 2 Ferricytochrome b5 <=> NAD+ + 2 Ferrocytochrome b5 + H+	C00004_c + 2 C00996_c <=> C00003_c + 2 C00999_c + C00080_c	NADH:ferricytochrome-b5 oxidoreductase	-1000	1000								R00100#NADH + 2 Ferricytochrome b5 <=> NAD+ + 2 Ferrocytochrome b5 + H+#C00004_c + 2 C00996_c <=> C00003_c + 2 C00999_c + C00080_c#-1000#1000#
	R00104	ATP + NAD+ <=> ADP + NADP+	C00002_c + C00003_c <=> C00008_c + C00006_c	ATP:NAD+ 2'-phosphotransferase	-1000	1000								R00104#ATP + NAD+ <=> ADP + NADP+#C00002_c + C00003_c <=> C00008_c + C00006_c#-1000#1000#
	R00112	NADPH + NAD+ <=> NADP+ + NADH	C00005_c + C00003_c <=> C00006_c + C00004_c	NADPH:NAD+ oxidoreductase	-1000	1000								R00112#NADPH + NAD+ <=> NADP+ + NADH#C00005_c + C00003_c <=> C00006_c + C00004_c#-1000#1000#
	R00130	ATP + Dephospho-CoA <=> ADP + CoA	C00002_c + C00882_c <=> C00008_c + C00010_c	ATP:dephospho-CoA 3'-phosphotransferase	-1000	1000								R00130#ATP + Dephospho-CoA <=> ADP + CoA#C00002_c + C00882_c <=> C00008_c + C00010_c#-1000#1000#
	R00132	Carbonic acid <=> CO2 + H2O	C01353_c <=> C00011_c + C00001_c	carbonate hydro-lyase (carbon-dioxide-forming)	-1000	1000								R00132#Carbonic acid <=> CO2 + H2O#C01353_c <=> C00011_c + C00001_c#-1000#1000#
	R00135	Peptide + H2O <=> L-Proline + Peptide	C00012_c + C00001_c <=> C00148_c + C00012_c		-1000	1000								R00135#Peptide + H2O <=> L-Proline + Peptide#C00012_c + C00001_c <=> C00148_c + C00012_c#-1000#1000#
	R00145	alpha-Amino acid + H2O + NAD+ <=> 2-Oxo acid + Ammonia + NADH + H+	C05167_c + C00001_c + C00003_c <=> C00161_c + C00014_c + C00004_c + C00080_c	alpha-amino acid:NAD+ oxidoreductase (deaminating)	-1000	1000								R00145#alpha-Amino acid + H2O + NAD+ <=> 2-Oxo acid + Ammonia + NADH + H+#C05167_c + C00001_c + C00003_c <=> C00161_c + C00014_c + C00004_c + C00080_c#-1000#1000#
	R00146	alpha-Amino acid + H2O + NADP+ <=> 2-Oxo acid + Ammonia + NADPH + H+	C05167_c + C00001_c + C00006_c <=> C00161_c + C00014_c + C00005_c + C00080_c	alpha-amino acid:NADP+ oxidoreductase (deaminating)	-1000	1000								R00146#alpha-Amino acid + H2O + NADP+ <=> 2-Oxo acid + Ammonia + NADPH + H+#C05167_c + C00001_c + C00006_c <=> C00161_c + C00014_c + C00005_c + C00080_c#-1000#1000#
	R00162	ATP + Protein <=> ADP + Phosphoprotein	C00002_c + C00017_c <=> C00008_c + C00562_c	ATP:protein phosphotransferase	-1000	1000								R00162#ATP + Protein <=> ADP + Phosphoprotein#C00002_c + C00017_c <=> C00008_c + C00562_c#-1000#1000#
	R00164	Phosphoprotein + H2O <=> Protein + Orthophosphate	C00562_c + C00001_c <=> C00017_c + C00009_c	Phosphoprotein phosphohydrolase	-1000	1000								R00164#Phosphoprotein + H2O <=> Protein + Orthophosphate#C00562_c + C00001_c <=> C00017_c + C00009_c#-1000#1000#
	R00173	Pyridoxal phosphate + H2O <=> Pyridoxal + Orthophosphate	C00018_c + C00001_c <=> C00250_c + C00009_c	pyridoxal-5'-phosphate phosphohydrolase	-1000	1000								R00173#Pyridoxal phosphate + H2O <=> Pyridoxal + Orthophosphate#C00018_c + C00001_c <=> C00250_c + C00009_c#-1000#1000#
	R00183	AMP + H2O <=> Adenosine + Orthophosphate	C00020_c + C00001_c <=> C00212_c + C00009_c	adenosine 5'-monophosphate phosphohydrolase	-1000	1000								R00183#AMP + H2O <=> Adenosine + Orthophosphate#C00020_c + C00001_c <=> C00212_c + C00009_c#-1000#1000#
	R00189	ATP + Deamino-NAD+ + Ammonia <=> AMP + Diphosphate + NAD+	C00002_c + C00857_c + C00014_c <=> C00020_c + C00013_c + C00003_c	deamido-NAD+:ammonia ligase (AMP-forming)	-1000	1000								R00189#ATP + Deamino-NAD+ + Ammonia <=> AMP + Diphosphate + NAD+#C00002_c + C00857_c + C00014_c <=> C00020_c + C00013_c + C00003_c#-1000#1000#
	R00229	ATP + Acetate + CoA <=> ADP + Acetyl-CoA + Orthophosphate	C00002_c + C00033_c + C00010_c <=> C00008_c + C00024_c + C00009_c	Acetate:CoA ligase (ADP-forming)	-1000	1000								R00229#ATP + Acetate + CoA <=> ADP + Acetyl-CoA + Orthophosphate#C00002_c + C00033_c + C00010_c <=> C00008_c + C00024_c + C00009_c#-1000#1000#
	R00235	ATP + Acetate + CoA <=> AMP + Diphosphate + Acetyl-CoA	C00002_c + C00033_c + C00010_c <=> C00020_c + C00013_c + C00024_c	Acetate:CoA ligase (AMP-forming)	-1000	1000								R00235#ATP + Acetate + CoA <=> AMP + Diphosphate + Acetyl-CoA#C00002_c + C00033_c + C00010_c <=> C00020_c + C00013_c + C00024_c#-1000#1000#
	R00236	Acetyl adenylate + CoA <=> AMP + Acetyl-CoA	C05993_c + C00010_c <=> C00020_c + C00024_c	acetyl adenylate:CoA acetyltransferase	-1000	1000								R00236#Acetyl adenylate + CoA <=> AMP + Acetyl-CoA#C05993_c + C00010_c <=> C00020_c + C00024_c#-1000#1000#
	R00238	2 Acetyl-CoA <=> CoA + Acetoacetyl-CoA	2 C00024_c <=> C00010_c + C00332_c	Acetyl-CoA:acetyl-CoA C-acetyltransferase	-1000	1000								R00238#2 Acetyl-CoA <=> CoA + Acetoacetyl-CoA#2 C00024_c <=> C00010_c + C00332_c#-1000#1000#
	R00243	L-Glutamate + NAD+ + H2O <=> 2-Oxoglutarate + Ammonia + NADH + H+	C00025_c + C00003_c + C00001_c <=> C00026_c + C00014_c + C00004_c + C00080_c	L-glutamate:NAD+ oxidoreductase (deaminating)	-1000	1000								R00243#L-Glutamate + NAD+ + H2O <=> 2-Oxoglutarate + Ammonia + NADH + H+#C00025_c + C00003_c + C00001_c <=> C00026_c + C00014_c + C00004_c + C00080_c#-1000#1000#
	R00245	L-Glutamate 5-semialdehyde + NAD+ + H2O <=> L-Glutamate + NADH + H+	C01165_c + C00003_c + C00001_c <=> C00025_c + C00004_c + C00080_c	L-glutamate gamma-semialdehyde:NAD+ oxidoreductase	-1000	1000								R00245#L-Glutamate 5-semialdehyde + NAD+ + H2O <=> L-Glutamate + NADH + H+#C01165_c + C00003_c + C00001_c <=> C00025_c + C00004_c + C00080_c#-1000#1000#
	R00248	L-Glutamate + NADP+ + H2O <=> 2-Oxoglutarate + Ammonia + NADPH + H+	C00025_c + C00006_c + C00001_c <=> C00026_c + C00014_c + C00005_c + C00080_c	L-Glutamate:NADP+ oxidoreductase (deaminating)	-1000	1000								R00248#L-Glutamate + NADP+ + H2O <=> 2-Oxoglutarate + Ammonia + NADPH + H+#C00025_c + C00006_c + C00001_c <=> C00026_c + C00014_c + C00005_c + C00080_c#-1000#1000#
	R00251	ATP + Pidolic acid + 2 H2O <=> ADP + Orthophosphate + L-Glutamate	C00002_c + C01879_c + 2 C00001_c <=> C00008_c + C00009_c + C00025_c	5-oxo-L-proline amidohydrolase (ATP-hydrolysing)	-1000	1000								R00251#ATP + Pidolic acid + 2 H2O <=> ADP + Orthophosphate + L-Glutamate#C00002_c + C01879_c + 2 C00001_c <=> C00008_c + C00009_c + C00025_c#-1000#1000#
	R00253	ATP + L-Glutamate + Ammonia <=> ADP + Orthophosphate + L-Glutamine	C00002_c + C00025_c + C00014_c <=> C00008_c + C00009_c + C00064_c	L-Glutamate:ammonia ligase (ADP-forming)	-1000	1000								R00253#ATP + L-Glutamate + Ammonia <=> ADP + Orthophosphate + L-Glutamine#C00002_c + C00025_c + C00014_c <=> C00008_c + C00009_c + C00064_c#-1000#1000#
	R00256	L-Glutamine + H2O <=> L-Glutamate + Ammonia	C00064_c + C00001_c <=> C00025_c + C00014_c	L-glutamine amidohydrolase	-1000	1000								R00256#L-Glutamine + H2O <=> L-Glutamate + Ammonia#C00064_c + C00001_c <=> C00025_c + C00014_c#-1000#1000#
	R00257	ATP + Deamino-NAD+ + L-Glutamine + H2O <=> AMP + Diphosphate + NAD+ + L-Glutamate	C00002_c + C00857_c + C00064_c + C00001_c <=> C00020_c + C00013_c + C00003_c + C00025_c	Deamido-NAD+:L-glutamine amido-ligase (AMP-forming)	-1000	1000								R00257#ATP + Deamino-NAD+ + L-Glutamine + H2O <=> AMP + Diphosphate + NAD+ + L-Glutamate#C00002_c + C00857_c + C00064_c + C00001_c <=> C00020_c + C00013_c + C00003_c + C00025_c#-1000#1000#
	R00258	L-Alanine + 2-Oxoglutarate <=> Pyruvate + L-Glutamate	C00041_c + C00026_c <=> C00022_c + C00025_c	L-Alanine:2-oxoglutarate aminotransferase	-1000	1000								R00258#L-Alanine + 2-Oxoglutarate <=> Pyruvate + L-Glutamate#C00041_c + C00026_c <=> C00022_c + C00025_c#-1000#1000#
	R00264	2,5-Dioxopentanoate + NADP+ + H2O <=> 2-Oxoglutarate + NADPH + H+	C00433_c + C00006_c + C00001_c <=> C00026_c + C00005_c + C00080_c	2,5-dioxopentanoate:NADP+ 5-oxidoreductase	-1000	1000								R00264#2,5-Dioxopentanoate + NADP+ + H2O <=> 2-Oxoglutarate + NADPH + H+#C00433_c + C00006_c + C00001_c <=> C00026_c + C00005_c + C00080_c#-1000#1000#
	R00269	2-Oxoglutaramate + H2O <=> 2-Oxoglutarate + Ammonia	C00940_c + C00001_c <=> C00026_c + C00014_c	2-oxoglutaramate amidohydrolase	-1000	1000								R00269#2-Oxoglutaramate + H2O <=> 2-Oxoglutarate + Ammonia#C00940_c + C00001_c <=> C00026_c + C00014_c#-1000#1000#
	R00274	Hydrogen peroxide + 2 Glutathione <=> Glutathione disulfide + 2 H2O	C00027_c + 2 C00051_c <=> C00127_c + 2 C00001_c	glutathione:hydrogen-peroxide oxidoreductase	-1000	1000								R00274#Hydrogen peroxide + 2 Glutathione <=> Glutathione disulfide + 2 H2O#C00027_c + 2 C00051_c <=> C00127_c + 2 C00001_c#-1000#1000#
	R00275	2 O2.- + 2 H+ <=> Hydrogen peroxide + Oxygen	2 C00704_c + 2 C00080_c <=> C00027_c + C00007_c	superoxide:superoxide oxidoreductase	-1000	1000								R00275#2 O2.- + 2 H+ <=> Hydrogen peroxide + Oxygen#2 C00704_c + 2 C00080_c <=> C00027_c + C00007_c#-1000#1000#
	R00286	UDP-glucose + H2O + 2 NAD+ <=> UDP-glucuronate + 2 NADH + 2 H+	C00029_c + C00001_c + 2 C00003_c <=> C00167_c + 2 C00004_c + 2 C00080_c	UDP-glucose:NAD+ 6-oxidoreductase	-1000	1000								R00286#UDP-glucose + H2O + 2 NAD+ <=> UDP-glucuronate + 2 NADH + 2 H+#C00029_c + C00001_c + 2 C00003_c <=> C00167_c + 2 C00004_c + 2 C00080_c#-1000#1000#
	R00289	UTP + D-Glucose 1-phosphate <=> Diphosphate + UDP-glucose	C00075_c + C00103_c <=> C00013_c + C00029_c	UTP:alpha-D-glucose-1-phosphate uridylyltransferase	-1000	1000								R00289#UTP + D-Glucose 1-phosphate <=> Diphosphate + UDP-glucose#C00075_c + C00103_c <=> C00013_c + C00029_c#-1000#1000#
	R00291	UDP-glucose <=> UDP-alpha-D-galactose	C00029_c <=> C00052_c	UDP-glucose 4-epimerase	-1000	1000								R00291#UDP-glucose <=> UDP-alpha-D-galactose#C00029_c <=> C00052_c#-1000#1000#
	R00299	ATP + D-Glucose <=> ADP + D-Glucose 6-phosphate	C00002_c + C00031_c <=> C00008_c + C00092_c	ATP:D-glucose 6-phosphotransferase	-1000	1000								R00299#ATP + D-Glucose <=> ADP + D-Glucose 6-phosphate#C00002_c + C00031_c <=> C00008_c + C00092_c#-1000#1000#
	R00310	Protoporphyrin + Fe2+ <=> Heme + 2 H+	C02191_c + C14818_c <=> C00032_c + 2 C00080_c	protoheme ferro-lyase (protoporphyrin-forming)	-1000	1000								R00310#Protoporphyrin + Fe2+ <=> Heme + 2 H+#C02191_c + C14818_c <=> C00032_c + 2 C00080_c#-1000#1000#
	R00316	ATP + Acetate <=> Diphosphate + Acetyl adenylate	C00002_c + C00033_c <=> C00013_c + C05993_c	ATP:acetate adenylyltransferase	-1000	1000								R00316#ATP + Acetate <=> Diphosphate + Acetyl adenylate#C00002_c + C00033_c <=> C00013_c + C05993_c#-1000#1000#
	R00348	2-Oxosuccinamate + H2O <=> Oxaloacetate + Ammonia	C02362_c + C00001_c <=> C00036_c + C00014_c	2-oxosuccinamate amidohydrolase	-1000	1000								R00348#2-Oxosuccinamate + H2O <=> Oxaloacetate + Ammonia#C02362_c + C00001_c <=> C00036_c + C00014_c#-1000#1000#
	R00355	L-Aspartate + 2-Oxoglutarate <=> Oxaloacetate + L-Glutamate	C00049_c + C00026_c <=> C00036_c + C00025_c	L-Aspartate:2-oxoglutarate aminotransferase	-1000	1000								R00355#L-Aspartate + 2-Oxoglutarate <=> Oxaloacetate + L-Glutamate#C00049_c + C00026_c <=> C00036_c + C00025_c#-1000#1000#
	R00371	Acetyl-CoA + Glycine <=> CoA + L-2-Amino-3-oxobutanoic acid	C00024_c + C00037_c <=> C00010_c + C03508_c	Acetyl-CoA:glycine C-acetyltransferase	-1000	1000								R00371#Acetyl-CoA + Glycine <=> CoA + L-2-Amino-3-oxobutanoic acid#C00024_c + C00037_c <=> C00010_c + C03508_c#-1000#1000#
	R00375	dATP + DNA <=> Diphosphate + DNA	C00131_c + C00039_c <=> C00013_c + C00039_c	Deoxyadenosine 5'-triphosphate:DNA deoxynucleotidyltransferase (DNA-directed)	-1000	1000								R00375#dATP + DNA <=> Diphosphate + DNA#C00131_c + C00039_c <=> C00013_c + C00039_c#-1000#1000#
	R00376	dGTP + DNA <=> Diphosphate + DNA	C00286_c + C00039_c <=> C00013_c + C00039_c	Deoxyguanosine 5'-triphosphate:DNA deoxynucleotidyltransferase (DNA-directed)	-1000	1000								R00376#dGTP + DNA <=> Diphosphate + DNA#C00286_c + C00039_c <=> C00013_c + C00039_c#-1000#1000#
	R00377	dCTP + DNA <=> Diphosphate + DNA	C00458_c + C00039_c <=> C00013_c + C00039_c	Deoxycytidine triphosphate:DNA deoxynucleotidyltransferase (DNA-directed)	-1000	1000								R00377#dCTP + DNA <=> Diphosphate + DNA#C00458_c + C00039_c <=> C00013_c + C00039_c#-1000#1000#
	R00378	dTTP + DNA <=> Diphosphate + DNA	C00459_c + C00039_c <=> C00013_c + C00039_c	deoxythymidine triphosphate:DNA deoxynucleotidyltransferase (DNA-directed)	-1000	1000								R00378#dTTP + DNA <=> Diphosphate + DNA#C00459_c + C00039_c <=> C00013_c + C00039_c#-1000#1000#
	R00379	Deoxynucleoside triphosphate + DNA(n) <=> Diphosphate + DNA(n+1)	C00677_c + C00039_c <=> C00013_c + C00039_c	Deoxynucleoside triphosphate:DNA deoxynucleotidyltransferase	-1000	1000								R00379#Deoxynucleoside triphosphate + DNA(n) <=> Diphosphate + DNA(n+1)#C00677_c + C00039_c <=> C00013_c + C00039_c#-1000#1000#
	R00381	ATP + DNA(n) + 5'-Phospho-DNA(m) <=> AMP + Diphosphate + DNA(n+m)	C00002_c + C00039_c + C02128_c <=> C00020_c + C00013_c + C00039_c	(deoxyribonucleotide)n:5'-phospho-(deoxyribonucleotide)m ligase (AMP-forming)	-1000	1000								R00381#ATP + DNA(n) + 5'-Phospho-DNA(m) <=> AMP + Diphosphate + DNA(n+m)#C00002_c + C00039_c + C02128_c <=> C00020_c + C00013_c + C00039_c#-1000#1000#
	R00382	NAD+ + DNA(n) + 5'-Phospho-DNA(m) <=> AMP + Nicotinamide D-ribonucleotide + DNA(n+m)	C00003_c + C00039_c + C02128_c <=> C00020_c + C00455_c + C00039_c	(deoxyribonucleotide)n:5'-phospho-(deoxyribonucleotide)m ligase (AMP-forming, NMN-forming)	-1000	1000								R00382#NAD+ + DNA(n) + 5'-Phospho-DNA(m) <=> AMP + Nicotinamide D-ribonucleotide + DNA(n+m)#C00003_c + C00039_c + C02128_c <=> C00020_c + C00455_c + C00039_c#-1000#1000#
	R00388	Acyl-CoA + Oxygen <=> trans-2,3-Dehydroacyl-CoA + Hydrogen peroxide	C00040_c + C00007_c <=> C00658_c + C00027_c	Acyl-CoA:oxygen 2-oxidoreductase	-1000	1000								R00388#Acyl-CoA + Oxygen <=> trans-2,3-Dehydroacyl-CoA + Hydrogen peroxide#C00040_c + C00007_c <=> C00658_c + C00027_c#-1000#1000#
	R00390	ATP + Long-chain carboxylate + CoA <=> AMP + Diphosphate + Acyl-CoA	C00002_c + C00347_c + C00010_c <=> C00020_c + C00013_c + C00040_c	Long-chain carboxylate:CoA ligase (AMP-forming)	-1000	1000								R00390#ATP + Long-chain carboxylate + CoA <=> AMP + Diphosphate + Acyl-CoA#C00002_c + C00347_c + C00010_c <=> C00020_c + C00013_c + C00040_c#-1000#1000#
	R00391	Acyl-CoA + Acetyl-CoA <=> CoA + 3-Oxoacyl-CoA	C00040_c + C00024_c <=> C00010_c + C00264_c	Acyl-CoA:acetyl-CoA C-acyltransferase	-1000	1000								R00391#Acyl-CoA + Acetyl-CoA <=> CoA + 3-Oxoacyl-CoA#C00040_c + C00024_c <=> C00010_c + C00264_c#-1000#1000#
	R00410	Succinyl-CoA + Acetoacetate <=> Succinate + Acetoacetyl-CoA	C00091_c + C00164_c <=> C00042_c + C00332_c	succinyl-CoA:acetoacetate CoA-transferase	-1000	1000								R00410#Succinyl-CoA + Acetoacetate <=> Succinate + Acetoacetyl-CoA#C00091_c + C00164_c <=> C00042_c + C00332_c#-1000#1000#
	R00416	UTP + N-Acetyl-alpha-D-glucosamine 1-phosphate <=> Diphosphate + UDP-N-acetyl-alpha-D-glucosamine	C00075_c + C04501_c <=> C00013_c + C00043_c	UTP:N-acetyl-alpha-D-glucosamine-1-phosphate uridylyltransferase	-1000	1000								R00416#UTP + N-Acetyl-alpha-D-glucosamine 1-phosphate <=> Diphosphate + UDP-N-acetyl-alpha-D-glucosamine#C00075_c + C04501_c <=> C00013_c + C00043_c#-1000#1000#
	R00432	GTP + Succinate + CoA <=> GDP + Orthophosphate + Succinyl-CoA	C00044_c + C00042_c + C00010_c <=> C00035_c + C00009_c + C00091_c	Succinate:CoA ligase (GDP-forming)	-1000	1000								R00432#GTP + Succinate + CoA <=> GDP + Orthophosphate + Succinyl-CoA#C00044_c + C00042_c + C00010_c <=> C00035_c + C00009_c + C00091_c#-1000#1000#
	R00435	ATP + RNA <=> Diphosphate + RNA	C00002_c + C00046_c <=> C00013_c + C00046_c	ATP:polynucleotide adenylyltransferase	-1000	1000								R00435#ATP + RNA <=> Diphosphate + RNA#C00002_c + C00046_c <=> C00013_c + C00046_c#-1000#1000#
	R00441	GTP + RNA <=> Diphosphate + RNA	C00044_c + C00046_c <=> C00013_c + C00046_c	GTP:RNA guanylyltransferase (DNA-directed)	-1000	1000								R00441#GTP + RNA <=> Diphosphate + RNA#C00044_c + C00046_c <=> C00013_c + C00046_c#-1000#1000#
	R00442	CTP + RNA <=> Diphosphate + RNA	C00063_c + C00046_c <=> C00013_c + C00046_c	CTP:RNA cytidylyltransferase (DNA-directed)	-1000	1000								R00442#CTP + RNA <=> Diphosphate + RNA#C00063_c + C00046_c <=> C00013_c + C00046_c#-1000#1000#
	R00443	UTP + RNA <=> Diphosphate + RNA	C00075_c + C00046_c <=> C00013_c + C00046_c	UTP:RNA uridylyltransferase	-1000	1000								R00443#UTP + RNA <=> Diphosphate + RNA#C00075_c + C00046_c <=> C00013_c + C00046_c#-1000#1000#
	R00444	Nucleoside triphosphate + RNA <=> Diphosphate + RNA	C00201_c + C00046_c <=> C00013_c + C00046_c	nucleoside-triphosphate:RNA nucleotidyltransferase (DNA-directed)	-1000	1000								R00444#Nucleoside triphosphate + RNA <=> Diphosphate + RNA#C00201_c + C00046_c <=> C00013_c + C00046_c#-1000#1000#
	R00451	meso-2,6-Diaminoheptanedioate <=> L-Lysine + CO2	C00680_c <=> C00047_c + C00011_c	meso-2,6-diaminoheptanedioate carboxy-lyase (L-lysine-forming)	-1000	1000								R00451#meso-2,6-Diaminoheptanedioate <=> L-Lysine + CO2#C00680_c <=> C00047_c + C00011_c#-1000#1000#
	R00475	Glycolate + Oxygen <=> Glyoxylate + Hydrogen peroxide	C00160_c + C00007_c <=> C00048_c + C00027_c	glycolate:oxygen 2-oxidoreductase	-1000	1000								R00475#Glycolate + Oxygen <=> Glyoxylate + Hydrogen peroxide#C00160_c + C00007_c <=> C00048_c + C00027_c#-1000#1000#
	R00483	ATP + L-Aspartate + Ammonia <=> AMP + Diphosphate + L-Asparagine	C00002_c + C00049_c + C00014_c <=> C00020_c + C00013_c + C00152_c	L-aspartate:ammonia ligase (AMP-forming)	-1000	1000								R00483#ATP + L-Aspartate + Ammonia <=> AMP + Diphosphate + L-Asparagine#C00002_c + C00049_c + C00014_c <=> C00020_c + C00013_c + C00152_c#-1000#1000#
	R00497	ATP + gamma-L-Glutamyl-L-cysteine + Glycine <=> ADP + Orthophosphate + Glutathione	C00002_c + C00669_c + C00037_c <=> C00008_c + C00009_c + C00051_c	gamma-L-glutamyl-L-cysteine:glycine ligase (ADP-forming)	-1000	1000								R00497#ATP + gamma-L-Glutamyl-L-cysteine + Glycine <=> ADP + Orthophosphate + Glutathione#C00002_c + C00669_c + C00037_c <=> C00008_c + C00009_c + C00051_c#-1000#1000#
	R00502	UTP + alpha-D-Galactose 1-phosphate <=> Diphosphate + UDP-alpha-D-galactose	C00075_c + C00446_c <=> C00013_c + C00052_c	UTP:alpha-D-galactose-1-phosphate uridylyltransferase	-1000	1000								R00502#UTP + alpha-D-Galactose 1-phosphate <=> Diphosphate + UDP-alpha-D-galactose#C00075_c + C00446_c <=> C00013_c + C00052_c#-1000#1000#
	R00511	CMP + H2O <=> Cytidine + Orthophosphate	C00055_c + C00001_c <=> C00475_c + C00009_c	cytidine-5'-monophosphate phosphohydrolase	-1000	1000								R00511#CMP + H2O <=> Cytidine + Orthophosphate#C00055_c + C00001_c <=> C00475_c + C00009_c#-1000#1000#
	R00538	Aldehyde + NAD+ + H2O <=> Carboxylate + NADH + H+	C00071_c + C00003_c + C00001_c <=> C00060_c + C00004_c + C00080_c	Aldehyde:NAD+ oxidoreductase	-1000	1000								R00538#Aldehyde + NAD+ + H2O <=> Carboxylate + NADH + H+#C00071_c + C00003_c + C00001_c <=> C00060_c + C00004_c + C00080_c#-1000#1000#
	R00578	ATP + L-Aspartate + L-Glutamine + H2O <=> AMP + Diphosphate + L-Asparagine + L-Glutamate	C00002_c + C00049_c + C00064_c + C00001_c <=> C00020_c + C00013_c + C00152_c + C00025_c	L-aspartate:L-glutamine amido-ligase (AMP-forming)	-1000	1000								R00578#ATP + L-Aspartate + L-Glutamine + H2O <=> AMP + Diphosphate + L-Asparagine + L-Glutamate#C00002_c + C00049_c + C00064_c + C00001_c <=> C00020_c + C00013_c + C00152_c + C00025_c#-1000#1000#
	R00602	Methanol + Hydrogen peroxide <=> Formaldehyde + 2 H2O	C00132_c + C00027_c <=> C00067_c + 2 C00001_c	methanol:hydrogen-peroxide oxidoreductase	-1000	1000								R00602#Methanol + Hydrogen peroxide <=> Formaldehyde + 2 H2O#C00132_c + C00027_c <=> C00067_c + 2 C00001_c#-1000#1000#
	R00610	Sarcosine + H2O + Oxygen <=> Glycine + Formaldehyde + Hydrogen peroxide	C00213_c + C00001_c + C00007_c <=> C00037_c + C00067_c + C00027_c	sarcosine:oxygen oxidoreductase (demethylating)	-1000	1000								R00610#Sarcosine + H2O + Oxygen <=> Glycine + Formaldehyde + Hydrogen peroxide#C00213_c + C00001_c + C00007_c <=> C00037_c + C00067_c + C00027_c#-1000#1000#
	R00616	ATP + Thiamin diphosphate <=> ADP + Thiamin triphosphate	C00002_c + C00068_c <=> C00008_c + C03028_c	ATP:thiamine-diphosphate phosphotransferase	-1000	1000								R00616#ATP + Thiamin diphosphate <=> ADP + Thiamin triphosphate#C00002_c + C00068_c <=> C00008_c + C03028_c#-1000#1000#
	R00619	ATP + Thiamine <=> AMP + Thiamin diphosphate	C00002_c + C00378_c <=> C00020_c + C00068_c	ATP:thiamine diphosphotransferase	-1000	1000								R00619#ATP + Thiamine <=> AMP + Thiamin diphosphate#C00002_c + C00378_c <=> C00020_c + C00068_c#-1000#1000#
	R00626	Orthophosphoric monoester + H2O <=> Alcohol + Orthophosphate	C01153_c + C00001_c <=> C00069_c + C00009_c	phosphate-monoester phosphohydrolase	-1000	1000								R00626#Orthophosphoric monoester + H2O <=> Alcohol + Orthophosphate#C01153_c + C00001_c <=> C00069_c + C00009_c#-1000#1000#
	R00631	Aldehyde + NAD+ + H2O <=> Fatty acid + NADH + H+	C00071_c + C00003_c + C00001_c <=> C00162_c + C00004_c + C00080_c	aldehyde:NAD+ oxidoreductase	-1000	1000								R00631#Aldehyde + NAD+ + H2O <=> Fatty acid + NADH + H+#C00071_c + C00003_c + C00001_c <=> C00162_c + C00004_c + C00080_c#-1000#1000#
	R00670	L-Ornithine <=> Putrescine + CO2	C00077_c <=> C00134_c + C00011_c	L-ornithine carboxy-lyase (putrescine-forming)	-1000	1000								R00670#L-Ornithine <=> Putrescine + CO2#C00077_c <=> C00134_c + C00011_c#-1000#1000#
	R00678	L-Tryptophan + Oxygen <=> L-Formylkynurenine	C00078_c + C00007_c <=> C02700_c	L-tryptophan:oxygen 2,3-oxidoreductase (decyclizing)	-1000	1000								R00678#L-Tryptophan + Oxygen <=> L-Formylkynurenine#C00078_c + C00007_c <=> C02700_c#-1000#1000#
	R00694	L-Phenylalanine + 2-Oxoglutarate <=> Phenylpyruvate + L-Glutamate	C00079_c + C00026_c <=> C00166_c + C00025_c	L-Phenylalanine:2-oxoglutarate aminotransferase	-1000	1000								R00694#L-Phenylalanine + 2-Oxoglutarate <=> Phenylpyruvate + L-Glutamate#C00079_c + C00026_c <=> C00166_c + C00025_c#-1000#1000#
	R00702	2 trans,trans-Farnesyl diphosphate <=> Diphosphate + Presqualene diphosphate	2 C00448_c <=> C00013_c + C03428_c	farnesyl-diphosphate:farnesyl-diphosphate farnesyltransferase	-1000	1000								R00702#2 trans,trans-Farnesyl diphosphate <=> Diphosphate + Presqualene diphosphate#2 C00448_c <=> C00013_c + C03428_c#-1000#1000#
	R00705	3-Oxopropanoate + CoA + NAD+ <=> Acetyl-CoA + CO2 + NADH + H+	C00222_c + C00010_c + C00003_c <=> C00024_c + C00011_c + C00004_c + C00080_c	3-Oxopropanoate:NAD+ oxidoreductase (decarboxylating, CoA-acetylating)	-1000	1000								R00705#3-Oxopropanoate + CoA + NAD+ <=> Acetyl-CoA + CO2 + NADH + H+#C00222_c + C00010_c + C00003_c <=> C00024_c + C00011_c + C00004_c + C00080_c#-1000#1000#
	R00707	(S)-1-Pyrroline-5-carboxylate + NAD+ + 2 H2O <=> L-Glutamate + NADH + H+	C03912_c + C00003_c + 2 C00001_c <=> C00025_c + C00004_c + C00080_c	(S)-1-pyrroline-5-carboxylate:NAD+ oxidoreductase	-1000	1000								R00707#(S)-1-Pyrroline-5-carboxylate + NAD+ + 2 H2O <=> L-Glutamate + NADH + H+#C03912_c + C00003_c + 2 C00001_c <=> C00025_c + C00004_c + C00080_c#-1000#1000#
	R00708	(S)-1-Pyrroline-5-carboxylate + NADP+ + 2 H2O <=> L-Glutamate + NADPH + H+	C03912_c + C00006_c + 2 C00001_c <=> C00025_c + C00005_c + C00080_c	(S)-1-pyrroline-5-carboxylate:NADP+ oxidoreductase	-1000	1000								R00708#(S)-1-Pyrroline-5-carboxylate + NADP+ + 2 H2O <=> L-Glutamate + NADPH + H+#C03912_c + C00006_c + 2 C00001_c <=> C00025_c + C00005_c + C00080_c#-1000#1000#
	R00710	Acetaldehyde + NAD+ + H2O <=> Acetate + NADH + H+	C00084_c + C00003_c + C00001_c <=> C00033_c + C00004_c + C00080_c	Acetaldehyde:NAD+ oxidoreductase	-1000	1000								R00710#Acetaldehyde + NAD+ + H2O <=> Acetate + NADH + H+#C00084_c + C00003_c + C00001_c <=> C00033_c + C00004_c + C00080_c#-1000#1000#
	R00713	Succinate semialdehyde + NAD+ + H2O <=> Succinate + NADH + H+	C00232_c + C00003_c + C00001_c <=> C00042_c + C00004_c + C00080_c	succinate-semialdehyde:NAD+ oxidoreductase	-1000	1000								R00713#Succinate semialdehyde + NAD+ + H2O <=> Succinate + NADH + H+#C00232_c + C00003_c + C00001_c <=> C00042_c + C00004_c + C00080_c#-1000#1000#
	R00716	N6-(L-1,3-Dicarboxypropyl)-L-lysine + NADP+ + H2O <=> L-Lysine + 2-Oxoglutarate + NADPH + H+	C00449_c + C00006_c + C00001_c <=> C00047_c + C00026_c + C00005_c + C00080_c	N6-(L-1,3-Dicarboxypropyl)-L-lysine:NADP+ oxidoreductase (L-lysine-forming)	-1000	1000								R00716#N6-(L-1,3-Dicarboxypropyl)-L-lysine + NADP+ + H2O <=> L-Lysine + 2-Oxoglutarate + NADPH + H+#C00449_c + C00006_c + C00001_c <=> C00047_c + C00026_c + C00005_c + C00080_c#-1000#1000#
	R00734	L-Tyrosine + 2-Oxoglutarate <=> 3-(4-Hydroxyphenyl)pyruvate + L-Glutamate	C00082_c + C00026_c <=> C01179_c + C00025_c	L-tyrosine:2-oxoglutarate aminotransferase	-1000	1000								R00734#L-Tyrosine + 2-Oxoglutarate <=> 3-(4-Hydroxyphenyl)pyruvate + L-Glutamate#C00082_c + C00026_c <=> C01179_c + C00025_c#-1000#1000#
	R00756	ATP + D-Fructose 6-phosphate <=> ADP + D-Fructose 1,6-bisphosphate	C00002_c + C00085_c <=> C00008_c + C00354_c	ATP:D-fructose-6-phosphate 1-phosphotransferase	-1000	1000								R00756#ATP + D-Fructose 6-phosphate <=> ADP + D-Fructose 1,6-bisphosphate#C00002_c + C00085_c <=> C00008_c + C00354_c#-1000#1000#
	R00760	ATP + D-Fructose <=> ADP + D-Fructose 6-phosphate	C00002_c + C00095_c <=> C00008_c + C00085_c	ATP:D-fructose 6-phosphotransferase	-1000	1000								R00760#ATP + D-Fructose <=> ADP + D-Fructose 6-phosphate#C00002_c + C00095_c <=> C00008_c + C00085_c#-1000#1000#
	R00765	D-Glucosamine 6-phosphate + H2O <=> D-Fructose 6-phosphate + Ammonia	C00352_c + C00001_c <=> C00085_c + C00014_c	D-glucosamine-6-phosphate aminohydrolase (ketol isomerizing)	-1000	1000								R00765#D-Glucosamine 6-phosphate + H2O <=> D-Fructose 6-phosphate + Ammonia#C00352_c + C00001_c <=> C00085_c + C00014_c#-1000#1000#
	R00767	CTP + D-Fructose 6-phosphate <=> CDP + D-Fructose 1,6-bisphosphate	C00063_c + C00085_c <=> C00112_c + C00354_c	CTP:D-fructose-6-phosphate 1-phosphotransferase	-1000	1000								R00767#CTP + D-Fructose 6-phosphate <=> CDP + D-Fructose 1,6-bisphosphate#C00063_c + C00085_c <=> C00112_c + C00354_c#-1000#1000#
	R00768	L-Glutamine + D-Fructose 6-phosphate <=> L-Glutamate + D-Glucosamine 6-phosphate	C00064_c + C00085_c <=> C00025_c + C00352_c	L-glutamine:D-fructose-6-phosphate isomerase (deaminating)	-1000	1000								R00768#L-Glutamine + D-Fructose 6-phosphate <=> L-Glutamate + D-Glucosamine 6-phosphate#C00064_c + C00085_c <=> C00025_c + C00352_c#-1000#1000#
	R00769	UTP + D-Fructose 6-phosphate <=> UDP + D-Fructose 1,6-bisphosphate	C00075_c + C00085_c <=> C00015_c + C00354_c	UTP:D-fructose-6-phosphate 1-phosphotransferase	-1000	1000								R00769#UTP + D-Fructose 6-phosphate <=> UDP + D-Fructose 1,6-bisphosphate#C00075_c + C00085_c <=> C00015_c + C00354_c#-1000#1000#
	R00770	ITP + D-Fructose 6-phosphate <=> IDP + D-Fructose 1,6-bisphosphate	C00081_c + C00085_c <=> C00104_c + C00354_c	ITP:D-fructose-6-phosphate 1-phosphotransferase	-1000	1000								R00770#ITP + D-Fructose 6-phosphate <=> IDP + D-Fructose 1,6-bisphosphate#C00081_c + C00085_c <=> C00104_c + C00354_c#-1000#1000#
	R00771	D-Glucose 6-phosphate <=> D-Fructose 6-phosphate	C00092_c <=> C00085_c	D-glucose-6-phosphate aldose-ketose-isomerase	-1000	1000								R00771#D-Glucose 6-phosphate <=> D-Fructose 6-phosphate#C00092_c <=> C00085_c#-1000#1000#
	R00772	D-Mannose 6-phosphate <=> D-Fructose 6-phosphate	C00275_c <=> C00085_c	D-mannose-6-phosphate aldose-ketose-isomerase	-1000	1000								R00772#D-Mannose 6-phosphate <=> D-Fructose 6-phosphate#C00275_c <=> C00085_c#-1000#1000#
	R00782	L-Cysteine + H2O <=> Hydrogen sulfide + Pyruvate + Ammonia	C00097_c + C00001_c <=> C00283_c + C00022_c + C00014_c	L-Cysteine hydrogen-sulfide-lyase (deaminating pyruvate-forming)	-1000	1000								R00782#L-Cysteine + H2O <=> Hydrogen sulfide + Pyruvate + Ammonia#C00097_c + C00001_c <=> C00283_c + C00022_c + C00014_c#-1000#1000#
	R00801	Sucrose + H2O <=> D-Fructose + D-Glucose	C00089_c + C00001_c <=> C00095_c + C00031_c	sucrose glucohydrolase	-1000	1000								R00801#Sucrose + H2O <=> D-Fructose + D-Glucose#C00089_c + C00001_c <=> C00095_c + C00031_c#-1000#1000#
	R00802	Sucrose + H2O <=> beta-D-Fructose + alpha-D-Glucose	C00089_c + C00001_c <=> C02336_c + C00267_c	sucrose alpha-glucohydrolase	-1000	1000								R00802#Sucrose + H2O <=> beta-D-Fructose + alpha-D-Glucose#C00089_c + C00001_c <=> C02336_c + C00267_c#-1000#1000#
	R00829	Succinyl-CoA + Acetyl-CoA <=> CoA + 3-Oxoadipyl-CoA	C00091_c + C00024_c <=> C00010_c + C02232_c	succinyl-CoA:acetyl-CoA C-acyltransferase	-1000	1000								R00829#Succinyl-CoA + Acetyl-CoA <=> CoA + 3-Oxoadipyl-CoA#C00091_c + C00024_c <=> C00010_c + C02232_c#-1000#1000#
	R00830	Succinyl-CoA + Glycine <=> 5-Aminolevulinate + CoA + CO2	C00091_c + C00037_c <=> C00430_c + C00010_c + C00011_c	succinyl-CoA:glycine C-succinyltransferase (decarboxylating)	-1000	1000								R00830#Succinyl-CoA + Glycine <=> 5-Aminolevulinate + CoA + CO2#C00091_c + C00037_c <=> C00430_c + C00010_c + C00011_c#-1000#1000#
	R00836	UDP-glucose + D-Glucose 6-phosphate <=> UDP + alpha,alpha'-Trehalose 6-phosphate	C00029_c + C00092_c <=> C00015_c + C00689_c	UDP-glucose:D-glucose-6-phosphate 1-alpha-D-glucosyltransferase	-1000	1000								R00836#UDP-glucose + D-Glucose 6-phosphate <=> UDP + alpha,alpha'-Trehalose 6-phosphate#C00029_c + C00092_c <=> C00015_c + C00689_c#-1000#1000#
	R00867	ATP + D-Fructose <=> ADP + beta-D-Fructose 6-phosphate	C00002_c + C00095_c <=> C00008_c + C05345_c	ATP:D-fructose 6-phosphotransferase	-1000	1000								R00867#ATP + D-Fructose <=> ADP + beta-D-Fructose 6-phosphate#C00002_c + C00095_c <=> C00008_c + C05345_c#-1000#1000#
	R00885	GTP + D-Mannose 1-phosphate <=> Diphosphate + GDP-mannose	C00044_c + C00636_c <=> C00013_c + C00096_c	GTP:alpha-D-mannose-1-phosphate guanylyltransferase	-1000	1000								R00885#GTP + D-Mannose 1-phosphate <=> Diphosphate + GDP-mannose#C00044_c + C00636_c <=> C00013_c + C00096_c#-1000#1000#
	R00891	L-Serine + Hydrogen sulfide <=> L-Cysteine + H2O	C00065_c + C00283_c <=> C00097_c + C00001_c	L-serine hydro-lyase (adding hydrogen sulfide, L-cysteine-forming)	-1000	1000								R00891#L-Serine + Hydrogen sulfide <=> L-Cysteine + H2O#C00065_c + C00283_c <=> C00097_c + C00001_c#-1000#1000#
	R00894	ATP + L-Glutamate + L-Cysteine <=> ADP + Orthophosphate + gamma-L-Glutamyl-L-cysteine	C00002_c + C00025_c + C00097_c <=> C00008_c + C00009_c + C00669_c	L-glutamate:L-cysteine gamma-ligase (ADP-forming)	-1000	1000								R00894#ATP + L-Glutamate + L-Cysteine <=> ADP + Orthophosphate + gamma-L-Glutamyl-L-cysteine#C00002_c + C00025_c + C00097_c <=> C00008_c + C00009_c + C00669_c#-1000#1000#
	R00895	L-Cysteine + 2-Oxoglutarate <=> Mercaptopyruvate + L-Glutamate	C00097_c + C00026_c <=> C00957_c + C00025_c	L-Cysteine:2-oxoglutarate aminotransferase	-1000	1000								R00895#L-Cysteine + 2-Oxoglutarate <=> Mercaptopyruvate + L-Glutamate#C00097_c + C00026_c <=> C00957_c + C00025_c#-1000#1000#
	R00896	L-Cysteine + 2-Oxoglutarate <=> Mercaptopyruvate + Glutamate	C00097_c + C00026_c <=> C00957_c + C00302_c	L-cysteine:2-oxoglutarate aminotransferase	-1000	1000								R00896#L-Cysteine + 2-Oxoglutarate <=> Mercaptopyruvate + Glutamate#C00097_c + C00026_c <=> C00957_c + C00302_c#-1000#1000#
	R00897	O-Acetyl-L-serine + Hydrogen sulfide <=> L-Cysteine + Acetate	C00979_c + C00283_c <=> C00097_c + C00033_c	O3-acetyl-L-serine:hydrogen-sulfide 2-amino-2-carboxyethyltransferase	-1000	1000								R00897#O-Acetyl-L-serine + Hydrogen sulfide <=> L-Cysteine + Acetate#C00979_c + C00283_c <=> C00097_c + C00033_c#-1000#1000#
	R00899	Cys-Gly + H2O <=> L-Cysteine + Glycine	C01419_c + C00001_c <=> C00097_c + C00037_c	L-cysteinylglycine dipeptidase	-1000	1000								R00899#Cys-Gly + H2O <=> L-Cysteine + Glycine#C01419_c + C00001_c <=> C00097_c + C00037_c#-1000#1000#
	R00904	3-Aminopropanal + NAD+ + H2O <=> beta-Alanine + NADH + H+	C05665_c + C00003_c + C00001_c <=> C00099_c + C00004_c + C00080_c	3-aminopropanal:NAD+ oxidoreductase	-1000	1000								R00904#3-Aminopropanal + NAD+ + H2O <=> beta-Alanine + NADH + H+#C05665_c + C00003_c + C00001_c <=> C00099_c + C00004_c + C00080_c#-1000#1000#
	R00925	ATP + Propanoate + CoA <=> AMP + Diphosphate + Propanoyl-CoA	C00002_c + C00163_c + C00010_c <=> C00020_c + C00013_c + C00100_c	Propanoate:CoA ligase (AMP-forming)	-1000	1000								R00925#ATP + Propanoate + CoA <=> AMP + Diphosphate + Propanoyl-CoA#C00002_c + C00163_c + C00010_c <=> C00020_c + C00013_c + C00100_c#-1000#1000#
	R00926	Propionyladenylate + CoA <=> AMP + Propanoyl-CoA	C05983_c + C00010_c <=> C00020_c + C00100_c	Propionyladenylate:CoA propionyltransferase	-1000	1000								R00926#Propionyladenylate + CoA <=> AMP + Propanoyl-CoA#C05983_c + C00010_c <=> C00020_c + C00100_c#-1000#1000#
	R00927	Propanoyl-CoA + Acetyl-CoA <=> CoA + 2-Methylacetoacetyl-CoA	C00100_c + C00024_c <=> C00010_c + C03344_c	acetyl-CoA:propanoyl-CoA 2-C-acetyltransferase	-1000	1000								R00927#Propanoyl-CoA + Acetyl-CoA <=> CoA + 2-Methylacetoacetyl-CoA#C00100_c + C00024_c <=> C00010_c + C03344_c#-1000#1000#
	R00931	2-Methylcitrate + CoA <=> Propanoyl-CoA + Oxaloacetate + H2O	C02225_c + C00010_c <=> C00100_c + C00036_c + C00001_c	propanoyl-CoA:oxaloacetate C-propanoyltransferase (thioester-hydrolysing, 1-carboxyethyl-forming)	-1000	1000								R00931#2-Methylcitrate + CoA <=> Propanoyl-CoA + Oxaloacetate + H2O#C02225_c + C00010_c <=> C00100_c + C00036_c + C00001_c#-1000#1000#
	R00936	Tetrahydrofolate + NAD+ <=> Dihydrofolate + NADH + H+	C00101_c + C00003_c <=> C00415_c + C00004_c + C00080_c	5,6,7,8-tetrahydrofolate:NAD+ oxidoreductase	-1000	1000								R00936#Tetrahydrofolate + NAD+ <=> Dihydrofolate + NADH + H+#C00101_c + C00003_c <=> C00415_c + C00004_c + C00080_c#-1000#1000#
	R00937	Tetrahydrofolate + 2 NAD+ <=> Folate + 2 NADH + 2 H+	C00101_c + 2 C00003_c <=> C00504_c + 2 C00004_c + 2 C00080_c	5,6,7,8-tetrahydrofolate:NAD+ oxidoreductase	-1000	1000								R00937#Tetrahydrofolate + 2 NAD+ <=> Folate + 2 NADH + 2 H+#C00101_c + 2 C00003_c <=> C00504_c + 2 C00004_c + 2 C00080_c#-1000#1000#
	R00939	Tetrahydrofolate + NADP+ <=> Dihydrofolate + NADPH + H+	C00101_c + C00006_c <=> C00415_c + C00005_c + C00080_c	5,6,7,8-tetrahydrofolate:NADP+ oxidoreductase	-1000	1000								R00939#Tetrahydrofolate + NADP+ <=> Dihydrofolate + NADPH + H+#C00101_c + C00006_c <=> C00415_c + C00005_c + C00080_c#-1000#1000#
	R00940	Tetrahydrofolate + 2 NADP+ <=> Folate + 2 NADPH + 2 H+	C00101_c + 2 C00006_c <=> C00504_c + 2 C00005_c + 2 C00080_c	5,6,7,8-tetrahydrofolate:NADP+ oxidoreductase	-1000	1000								R00940#Tetrahydrofolate + 2 NADP+ <=> Folate + 2 NADPH + 2 H+#C00101_c + 2 C00006_c <=> C00504_c + 2 C00005_c + 2 C00080_c#-1000#1000#
	R00942	ATP + Tetrahydrofolate + L-Glutamate <=> ADP + Orthophosphate + THF-L-glutamate	C00002_c + C00101_c + C00025_c <=> C00008_c + C00009_c + C09332_c	Tetrahydrofolate:L-glutamate gamma-ligase (ADP-forming)	-1000	1000								R00942#ATP + Tetrahydrofolate + L-Glutamate <=> ADP + Orthophosphate + THF-L-glutamate#C00002_c + C00101_c + C00025_c <=> C00008_c + C00009_c + C09332_c#-1000#1000#
	R00945	5,10-Methylenetetrahydrofolate + Glycine + H2O <=> Tetrahydrofolate + L-Serine	C00143_c + C00037_c + C00001_c <=> C00101_c + C00065_c	5,10-Methylenetetrahydrofolate:glycine hydroxymethyltransferase	-1000	1000								R00945#5,10-Methylenetetrahydrofolate + Glycine + H2O <=> Tetrahydrofolate + L-Serine#C00143_c + C00037_c + C00001_c <=> C00101_c + C00065_c#-1000#1000#
	R00959	D-Glucose 1-phosphate <=> alpha-D-Glucose 6-phosphate	C00103_c <=> C00668_c	alpha-D-Glucose 1-phosphate 1,6-phosphomutase	-1000	1000								R00959#D-Glucose 1-phosphate <=> alpha-D-Glucose 6-phosphate#C00103_c <=> C00668_c#-1000#1000#
	R00963	UMP + H2O <=> Uridine + Orthophosphate	C00105_c + C00001_c <=> C00299_c + C00009_c	uridine 5'-monophosphate phosphohydrolase	-1000	1000								R00963#UMP + H2O <=> Uridine + Orthophosphate#C00105_c + C00001_c <=> C00299_c + C00009_c#-1000#1000#
	R00978	5,6-Dihydrouracil + NADP+ <=> Uracil + NADPH + H+	C00429_c + C00006_c <=> C00106_c + C00005_c + C00080_c	5,6-Dihydrouracil:NADP+ oxidoreductase	-1000	1000								R00978#5,6-Dihydrouracil + NADP+ <=> Uracil + NADPH + H+#C00429_c + C00006_c <=> C00106_c + C00005_c + C00080_c#-1000#1000#
	R00996	L-Threonine <=> 2-Oxobutanoate + Ammonia	C00188_c <=> C00109_c + C00014_c	L-threonine ammonia-lyase (2-oxobutanoate-forming)	-1000	1000								R00996#L-Threonine <=> 2-Oxobutanoate + Ammonia#C00188_c <=> C00109_c + C00014_c#-1000#1000#
	R01005	UDP-glucose + Dolichyl phosphate <=> UDP + Dolichyl beta-D-glucosyl phosphate	C00029_c + C00110_c <=> C00015_c + C01246_c	UDPglucose:dolichyl-phosphate beta-D-glucosyltransferase	-1000	1000								R01005#UDP-glucose + Dolichyl phosphate <=> UDP + Dolichyl beta-D-glucosyl phosphate#C00029_c + C00110_c <=> C00015_c + C01246_c#-1000#1000#
	R01007	UDP-N-acetyl-alpha-D-glucosamine + Dolichyl phosphate <=> UMP + N-Acetyl-D-glucosaminyldiphosphodolichol	C00043_c + C00110_c <=> C00105_c + C04500_c	UDP-N-acetyl-D-glucosamine:dolichyl-phosphate N-acetyl-D-glucosamine phosphotransferase	-1000	1000								R01007#UDP-N-acetyl-alpha-D-glucosamine + Dolichyl phosphate <=> UMP + N-Acetyl-D-glucosaminyldiphosphodolichol#C00043_c + C00110_c <=> C00105_c + C04500_c#-1000#1000#
	R01009	GDP-mannose + Dolichyl phosphate <=> GDP + Dolichyl phosphate D-mannose	C00096_c + C00110_c <=> C00035_c + C03862_c	GDPmannose:dolichyl-phosphate O-beta-D-mannosyltransferase	-1000	1000								R01009#GDP-mannose + Dolichyl phosphate <=> GDP + Dolichyl phosphate D-mannose#C00096_c + C00110_c <=> C00035_c + C03862_c#-1000#1000#
	R01010	Glycerone phosphate + H2O <=> Glycerone + Orthophosphate	C00111_c + C00001_c <=> C00184_c + C00009_c	Glycerone phosphate phosphohydrolase	-1000	1000								R01010#Glycerone phosphate + H2O <=> Glycerone + Orthophosphate#C00111_c + C00001_c <=> C00184_c + C00009_c#-1000#1000#
	R01015	D-Glyceraldehyde 3-phosphate <=> Glycerone phosphate	C00118_c <=> C00111_c	D-glyceraldehyde-3-phosphate aldose-ketose-isomerase	-1000	1000								R01015#D-Glyceraldehyde 3-phosphate <=> Glycerone phosphate#C00118_c <=> C00111_c#-1000#1000#
	R01057	alpha-D-Ribose 1-phosphate <=> D-Ribose 5-phosphate	C00620_c <=> C00117_c	D-Ribose 1,5-phosphomutase	-1000	1000								R01057#alpha-D-Ribose 1-phosphate <=> D-Ribose 5-phosphate#C00620_c <=> C00117_c#-1000#1000#
	R01100	Lactose + H2O <=> D-Glucose + D-Galactose	C00243_c + C00001_c <=> C00031_c + C00124_c	Lactose galactohydrolase	-1000	1000								R01100#Lactose + H2O <=> D-Glucose + D-Galactose#C00243_c + C00001_c <=> C00031_c + C00124_c#-1000#1000#
	R01101	Melibiose + H2O <=> D-Galactose + D-Glucose	C05402_c + C00001_c <=> C00124_c + C00031_c	melibiose galactohydrolase	-1000	1000								R01101#Melibiose + H2O <=> D-Galactose + D-Glucose#C05402_c + C00001_c <=> C00124_c + C00031_c#-1000#1000#
	R01103	Raffinose + H2O <=> D-Galactose + Sucrose	C00492_c + C00001_c <=> C00124_c + C00089_c	Raffinose galactohydrolase	-1000	1000								R01103#Raffinose + H2O <=> D-Galactose + Sucrose#C00492_c + C00001_c <=> C00124_c + C00089_c#-1000#1000#
	R01104	3-beta-D-Galactosyl-sn-glycerol + H2O <=> D-Galactose + Glycerol	C05401_c + C00001_c <=> C00124_c + C00116_c	Galactosylglycerol galactohydrolase	-1000	1000								R01104#3-beta-D-Galactosyl-sn-glycerol + H2O <=> D-Galactose + Glycerol#C05401_c + C00001_c <=> C00124_c + C00116_c#-1000#1000#
	R01105	Galactan + H2O <=> D-Galactose + Galactan	C05796_c + C00001_c <=> C00124_c + C05796_c	Galactan galactohydrolase	-1000	1000								R01105#Galactan + H2O <=> D-Galactose + Galactan#C05796_c + C00001_c <=> C00124_c + C05796_c#-1000#1000#
	R01121	ATP + (R)-5-Diphosphomevalonate <=> ADP + Orthophosphate + Isopentenyl diphosphate + CO2	C00002_c + C01143_c <=> C00008_c + C00009_c + C00129_c + C00011_c	ATP:(R)-5-diphosphomevalonate carboxy-lyase (adding ATP isopentenyl-diphosphate-forming)	-1000	1000								R01121#ATP + (R)-5-Diphosphomevalonate <=> ADP + Orthophosphate + Isopentenyl diphosphate + CO2#C00002_c + C01143_c <=> C00008_c + C00009_c + C00129_c + C00011_c#-1000#1000#
	R01123	Isopentenyl diphosphate <=> Dimethylallyl diphosphate	C00129_c <=> C00235_c	Isopentenyl-diphosphate delta3-delta2-isomerase	-1000	1000								R01123#Isopentenyl diphosphate <=> Dimethylallyl diphosphate#C00129_c <=> C00235_c#-1000#1000#
	R01126	IMP + H2O <=> Inosine + Orthophosphate	C00130_c + C00001_c <=> C00294_c + C00009_c	inosine 5'-monophosphate phosphohydrolase	-1000	1000								R01126#IMP + H2O <=> Inosine + Orthophosphate#C00130_c + C00001_c <=> C00294_c + C00009_c#-1000#1000#
	R01135	GTP + IMP + L-Aspartate <=> GDP + Orthophosphate + N6-(1,2-Dicarboxyethyl)-AMP	C00044_c + C00130_c + C00049_c <=> C00035_c + C00009_c + C03794_c	IMP:L-aspartate ligase (GDP-forming)	-1000	1000								R01135#GTP + IMP + L-Aspartate <=> GDP + Orthophosphate + N6-(1,2-Dicarboxyethyl)-AMP#C00044_c + C00130_c + C00049_c <=> C00035_c + C00009_c + C03794_c#-1000#1000#
	R01175	Butanoyl-CoA + FAD <=> FADH2 + Crotonoyl-CoA	C00136_c + C00016_c <=> C01352_c + C00877_c	butanoyl-CoA:electron-transfer flavoprotein 2,3-oxidoreductase	-1000	1000								R01175#Butanoyl-CoA + FAD <=> FADH2 + Crotonoyl-CoA#C00136_c + C00016_c <=> C01352_c + C00877_c#-1000#1000#
	R01177	Acetyl-CoA + Butanoyl-CoA <=> CoA + 3-Oxohexanoyl-CoA	C00024_c + C00136_c <=> C00010_c + C05269_c	butanoyl-CoA:acetyl-CoA C-butanoyltransferase	-1000	1000								R01177#Acetyl-CoA + Butanoyl-CoA <=> CoA + 3-Oxohexanoyl-CoA#C00024_c + C00136_c <=> C00010_c + C05269_c#-1000#1000#
	R01194	alpha-D-Galactosyl-(1->3)-1D-myo-inositol + H2O <=> myo-Inositol + D-Galactose	C01235_c + C00001_c <=> C00137_c + C00124_c	3-O-alpha-D-Galactosyl-1D-myo-inositol galactohydrolase	-1000	1000								R01194#alpha-D-Galactosyl-(1->3)-1D-myo-inositol + H2O <=> myo-Inositol + D-Galactose#C01235_c + C00001_c <=> C00137_c + C00124_c#-1000#1000#
	R01206	Chitin + H2O <=> N-Acetyl-D-glucosamine + Chitin	C00461_c + C00001_c <=> C00140_c + C00461_c	[1,4-(N-Acetyl-beta-D-glucosaminyl)]n glycanohydrolase	-1000	1000								R01206#Chitin + H2O <=> N-Acetyl-D-glucosamine + Chitin#C00461_c + C00001_c <=> C00140_c + C00461_c#-1000#1000#
	R01214	L-Valine + 2-Oxoglutarate <=> 3-Methyl-2-oxobutanoic acid + L-Glutamate	C00183_c + C00026_c <=> C00141_c + C00025_c	L-Valine:2-oxoglutarate aminotransferase	-1000	1000								R01214#L-Valine + 2-Oxoglutarate <=> 3-Methyl-2-oxobutanoic acid + L-Glutamate#C00183_c + C00026_c <=> C00141_c + C00025_c#-1000#1000#
	R01221	Glycine + Tetrahydrofolate + NAD+ <=> 5,10-Methylenetetrahydrofolate + Ammonia + CO2 + NADH + H+	C00037_c + C00101_c + C00003_c <=> C00143_c + C00014_c + C00011_c + C00004_c + C00080_c	glycine synthase	-1000	1000								R01221#Glycine + Tetrahydrofolate + NAD+ <=> 5,10-Methylenetetrahydrofolate + Ammonia + CO2 + NADH + H+#C00037_c + C00101_c + C00003_c <=> C00143_c + C00014_c + C00011_c + C00004_c + C00080_c#-1000#1000#
	R01227	GMP + H2O <=> Guanosine + Orthophosphate	C00144_c + C00001_c <=> C00387_c + C00009_c	guanosine 5'-monophosphate phosphohydrolase	-1000	1000								R01227#GMP + H2O <=> Guanosine + Orthophosphate#C00144_c + C00001_c <=> C00387_c + C00009_c#-1000#1000#
	R01248	L-Proline + NAD+ <=> (S)-1-Pyrroline-5-carboxylate + NADH + H+	C00148_c + C00003_c <=> C03912_c + C00004_c + C00080_c	L-Proline:NAD+ 5-oxidoreductase	-1000	1000								R01248#L-Proline + NAD+ <=> (S)-1-Pyrroline-5-carboxylate + NADH + H+#C00148_c + C00003_c <=> C03912_c + C00004_c + C00080_c#-1000#1000#
	R01274	Palmitoyl-CoA + H2O <=> CoA + Hexadecanoic acid	C00154_c + C00001_c <=> C00010_c + C00249_c	palmitoyl-CoA hydrolase	-1000	1000								R01274#Palmitoyl-CoA + H2O <=> CoA + Hexadecanoic acid#C00154_c + C00001_c <=> C00010_c + C00249_c#-1000#1000#
	R01279	Palmitoyl-CoA + FAD <=> trans-Hexadec-2-enoyl-CoA + FADH2	C00154_c + C00016_c <=> C05272_c + C01352_c	palmitoyl-CoA:electron-transfer flavoprotein 2,3-oxidoreductase	-1000	1000								R01279#Palmitoyl-CoA + FAD <=> trans-Hexadec-2-enoyl-CoA + FADH2#C00154_c + C00016_c <=> C05272_c + C01352_c#-1000#1000#
	R01289	L-Serine + L-Homocysteine <=> Cystathionine + H2O	C00065_c + C00155_c <=> C00542_c + C00001_c	L-Serine hydro-lyase (adding homocysteine)	-1000	1000								R01289#L-Serine + L-Homocysteine <=> Cystathionine + H2O#C00065_c + C00155_c <=> C00542_c + C00001_c#-1000#1000#
	R01310	Phosphatidylcholine + H2O <=> Phosphatidate + Choline	C00157_c + C00001_c <=> C00416_c + C00114_c	phosphatidylcholine phosphatidohydrolase	-1000	1000								R01310#Phosphatidylcholine + H2O <=> Phosphatidate + Choline#C00157_c + C00001_c <=> C00416_c + C00114_c#-1000#1000#
	R01312	Phosphatidylcholine + H2O <=> 1,2-Diacyl-sn-glycerol + Choline phosphate	C00157_c + C00001_c <=> C00641_c + C00588_c	Phosphatidylcholine cholinephosphohydrolase	-1000	1000								R01312#Phosphatidylcholine + H2O <=> 1,2-Diacyl-sn-glycerol + Choline phosphate#C00157_c + C00001_c <=> C00641_c + C00588_c#-1000#1000#
	R01329	Epimelibiose + H2O <=> D-Mannose + D-Galactose	C05400_c + C00001_c <=> C00159_c + C00124_c	Epimelibiose galactohydrolase	-1000	1000								R01329#Epimelibiose + H2O <=> D-Mannose + D-Galactose#C05400_c + C00001_c <=> C00159_c + C00124_c#-1000#1000#
	R01341	(S)-2-Hydroxyacid + Oxygen <=> 2-Oxo acid + Hydrogen peroxide	C15565_c + C00007_c <=> C00161_c + C00027_c	(S)-2-Hydroxy-acid:oxygen 2-oxidoreductase	-1000	1000								R01341#(S)-2-Hydroxyacid + Oxygen <=> 2-Oxo acid + Hydrogen peroxide#C15565_c + C00007_c <=> C00161_c + C00027_c#-1000#1000#
	R01343	L-Ornithine + 2-Oxo acid <=> L-Glutamate 5-semialdehyde + L-Amino acid	C00077_c + C00161_c <=> C01165_c + C00151_c	L-Ornithine:2-oxo-acid aminotransferase	-1000	1000								R01343#L-Ornithine + 2-Oxo acid <=> L-Glutamate 5-semialdehyde + L-Amino acid#C00077_c + C00161_c <=> C01165_c + C00151_c#-1000#1000#
	R01354	ATP + Propanoate <=> Diphosphate + Propionyladenylate	C00002_c + C00163_c <=> C00013_c + C05983_c	ATP:propanoate adenylyltransferase	-1000	1000								R01354#ATP + Propanoate <=> Diphosphate + Propionyladenylate#C00002_c + C00163_c <=> C00013_c + C05983_c#-1000#1000#
	R01364	Acetoacetate + Fumarate <=> 4-Fumarylacetoacetate + H2O	C00164_c + C00122_c <=> C01061_c + C00001_c	4-fumarylacetoacetate fumarylhydrolase	-1000	1000								R01364#Acetoacetate + Fumarate <=> 4-Fumarylacetoacetate + H2O#C00164_c + C00122_c <=> C01061_c + C00001_c#-1000#1000#
	R01366	Acetoacetate <=> Acetone + CO2	C00164_c <=> C00207_c + C00011_c	Acetoacetate carboxy-lyase (acetone-forming)	-1000	1000								R01366#Acetoacetate <=> Acetone + CO2#C00164_c <=> C00207_c + C00011_c#-1000#1000#
	R01369	Triacylglycerol + H2O <=> Diacylglycerol + Carboxylate	C00422_c + C00001_c <=> C00165_c + C00060_c	triacylglycerol acylhydrolase	-1000	1000								R01369#Triacylglycerol + H2O <=> Diacylglycerol + Carboxylate#C00422_c + C00001_c <=> C00165_c + C00060_c#-1000#1000#
	R01372	Phenylpyruvate + Oxygen <=> 2-Hydroxyphenylacetate + CO2	C00166_c + C00007_c <=> C05852_c + C00011_c	Phenylpyruvate:oxygen oxidoreductase (hydroxylating,decarboxylating)	-1000	1000								R01372#Phenylpyruvate + Oxygen <=> 2-Hydroxyphenylacetate + CO2#C00166_c + C00007_c <=> C05852_c + C00011_c#-1000#1000#
	R01381	UTP + D-Glucuronate 1-phosphate <=> Diphosphate + UDP-glucuronate	C00075_c + C05385_c <=> C00013_c + C00167_c	UTP:1-phospho-alpha-D-glucuronate uridylyltransferase	-1000	1000								R01381#UTP + D-Glucuronate 1-phosphate <=> Diphosphate + UDP-glucuronate#C00075_c + C05385_c <=> C00013_c + C00167_c#-1000#1000#
	R01415	5,6-Dihydrothymine + NADP+ <=> Thymine + NADPH + H+	C00906_c + C00006_c <=> C00178_c + C00005_c + C00080_c	5,6-Dihydrothymine:NADP+ oxidoreductase	-1000	1000								R01415#5,6-Dihydrothymine + NADP+ <=> Thymine + NADPH + H+#C00906_c + C00006_c <=> C00178_c + C00005_c + C00080_c#-1000#1000#
	R01461	Acyl-CoA + Cholesterol <=> CoA + Cholesterol ester	C00040_c + C00187_c <=> C00010_c + C02530_c	Acyl-CoA:cholesterol O-acyltransferase	-1000	1000								R01461#Acyl-CoA + Cholesterol <=> CoA + Cholesterol ester#C00040_c + C00187_c <=> C00010_c + C02530_c#-1000#1000#
	R01462	Cholesterol ester + H2O <=> Cholesterol + Fatty acid	C02530_c + C00001_c <=> C00187_c + C00162_c	cholesterol ester acylhydrolase	-1000	1000								R01462#Cholesterol ester + H2O <=> Cholesterol + Fatty acid#C02530_c + C00001_c <=> C00187_c + C00162_c#-1000#1000#
	R01471	UTP + alpha-D-Xylose 1-phosphate <=> Diphosphate + UDP-D-xylose	C00075_c + C03737_c <=> C00013_c + C00190_c	UTP:alpha-D-xylose-1-phosphate uridylyltransferase	-1000	1000								R01471#UTP + alpha-D-Xylose 1-phosphate <=> Diphosphate + UDP-D-xylose#C00075_c + C03737_c <=> C00013_c + C00190_c#-1000#1000#
	R01514	ATP + D-Glycerate <=> ADP + 3-Phospho-D-glycerate	C00002_c + C00258_c <=> C00008_c + C00197_c	ATP:(R)-glycerate 3-phosphotransferase	-1000	1000								R01514#ATP + D-Glycerate <=> ADP + 3-Phospho-D-glycerate#C00002_c + C00258_c <=> C00008_c + C00197_c#-1000#1000#
	R01529	D-Ribulose 5-phosphate <=> D-Xylulose 5-phosphate	C00199_c <=> C00231_c	D-Ribulose-5-phosphate 3-epimerase	-1000	1000								R01529#D-Ribulose 5-phosphate <=> D-Xylulose 5-phosphate#C00199_c <=> C00231_c#-1000#1000#
	R01569	dTMP + H2O <=> Thymidine + Orthophosphate	C00364_c + C00001_c <=> C00214_c + C00009_c	thymidylate 5'-phosphohydrolase	-1000	1000								R01569#dTMP + H2O <=> Thymidine + Orthophosphate#C00364_c + C00001_c <=> C00214_c + C00009_c#-1000#1000#
	R01602	alpha-D-Glucose <=> beta-D-Glucose	C00267_c <=> C00221_c	D-glucose 1-epimerase	-1000	1000								R01602#alpha-D-Glucose <=> beta-D-Glucose#C00267_c <=> C00221_c#-1000#1000#
	R01625	CoA + Apo-[acyl-carrier-protein] <=> Adenosine 3',5'-bisphosphate + Acyl-carrier protein	C00010_c + C03688_c <=> C00054_c + C00229_c	CoA:apo-[acyl-carrier-protein] pantetheinephosphotransferase	-1000	1000								R01625#CoA + Apo-[acyl-carrier-protein] <=> Adenosine 3',5'-bisphosphate + Acyl-carrier protein#C00010_c + C03688_c <=> C00054_c + C00229_c#-1000#1000#
	R01654	ATP + 10-Formyltetrahydrofolate + L-Glutamate <=> ADP + Orthophosphate + (6R)-10-Formyltetrahydropteroyldiglutamate	C00002_c + C00234_c + C00025_c <=> C00008_c + C00009_c + C05928_c	10-Formyltetrahydrofolate:L-glutamate ligase (ADP-forming)	-1000	1000								R01654#ATP + 10-Formyltetrahydrofolate + L-Glutamate <=> ADP + Orthophosphate + (6R)-10-Formyltetrahydropteroyldiglutamate#C00002_c + C00234_c + C00025_c <=> C00008_c + C00009_c + C05928_c#-1000#1000#
	R01658	Dimethylallyl diphosphate + Isopentenyl diphosphate <=> Diphosphate + Geranyl diphosphate	C00235_c + C00129_c <=> C00013_c + C00341_c	Dimethylallyl-diphosphate:isopentenyl-diphosphate dimethylallyltranstransferase	-1000	1000								R01658#Dimethylallyl diphosphate + Isopentenyl diphosphate <=> Diphosphate + Geranyl diphosphate#C00235_c + C00129_c <=> C00013_c + C00341_c#-1000#1000#
	R01664	dCMP + H2O <=> Deoxycytidine + Orthophosphate	C00239_c + C00001_c <=> C00881_c + C00009_c	2'-deoxycytidine 5'-monophosphate phosphohydrolase	-1000	1000								R01664#dCMP + H2O <=> Deoxycytidine + Orthophosphate#C00239_c + C00001_c <=> C00881_c + C00009_c#-1000#1000#
	R01678	Lactose + H2O <=> alpha-D-Glucose + D-Galactose	C00243_c + C00001_c <=> C00267_c + C00124_c	Lactose galactohydrolase	-1000	1000								R01678#Lactose + H2O <=> alpha-D-Glucose + D-Galactose#C00243_c + C00001_c <=> C00267_c + C00124_c#-1000#1000#
	R01698	Dihydrolipoamide + NAD+ <=> Lipoamide + NADH + H+	C00579_c + C00003_c <=> C00248_c + C00004_c + C00080_c	Dihydrolipoamide:NAD+ oxidoreductase	-1000	1000								R01698#Dihydrolipoamide + NAD+ <=> Lipoamide + NADH + H+#C00579_c + C00003_c <=> C00248_c + C00004_c + C00080_c#-1000#1000#
	R01700	2-Oxoglutarate + Enzyme N6-(lipoyl)lysine <=> [Dihydrolipoyllysine-residue succinyltransferase] S-succinyldihydrolipoyllysine + CO2	C00026_c + C15972_c <=> C16254_c + C00011_c	2-oxoglutarate:[dihydrolipoyllysine-residue succinyltransferase]-lipoyllysine 2-oxidoreductase (decarboxylating, acceptor-succinylating)	-1000	1000								R01700#2-Oxoglutarate + Enzyme N6-(lipoyl)lysine <=> [Dihydrolipoyllysine-residue succinyltransferase] S-succinyldihydrolipoyllysine + CO2#C00026_c + C15972_c <=> C16254_c + C00011_c#-1000#1000#
	R01705	Hexadecanoic acid + Protein <=> Palmitoyl-protein + H2O	C00249_c + C00017_c <=> C06412_c + C00001_c	Palmitoyl-protein hydrolase	-1000	1000								R01705#Hexadecanoic acid + Protein <=> Palmitoyl-protein + H2O#C00249_c + C00017_c <=> C06412_c + C00001_c#-1000#1000#
	R01706	Hexadecanoyl-[acp] + H2O <=> Acyl-carrier protein + Hexadecanoic acid	C05764_c + C00001_c <=> C00229_c + C00249_c	hexadecanoyl-[acyl-carrier protein] hydrolase	-1000	1000								R01706#Hexadecanoyl-[acp] + H2O <=> Acyl-carrier protein + Hexadecanoic acid#C05764_c + C00001_c <=> C00229_c + C00249_c#-1000#1000#
	R01714	5-O-(1-Carboxyvinyl)-3-phosphoshikimate <=> Chorismate + Orthophosphate	C01269_c <=> C00251_c + C00009_c	5-O-(1-Carboxyvinyl)-3-phosphoshikimate phosphate-lyase (chorismate-forming)	-1000	1000								R01714#5-O-(1-Carboxyvinyl)-3-phosphoshikimate <=> Chorismate + Orthophosphate#C01269_c <=> C00251_c + C00009_c#-1000#1000#
	R01724	Nicotinate D-ribonucleotide + Diphosphate + ADP + Orthophosphate <=> Nicotinate + 5-Phospho-alpha-D-ribose 1-diphosphate + ATP + H2O + H+	C01185_c + C00013_c + C00008_c + C00009_c <=> C00253_c + C00119_c + C00002_c + C00001_c + C00080_c	5-phospho-alpha-D-ribose 1-diphosphate:nicotinate ligase (ADP, diphosphate-forming)	-1000	1000								R01724#Nicotinate D-ribonucleotide + Diphosphate + ADP + Orthophosphate <=> Nicotinate + 5-Phospho-alpha-D-ribose 1-diphosphate + ATP + H2O + H+#C01185_c + C00013_c + C00008_c + C00009_c <=> C00253_c + C00119_c + C00002_c + C00001_c + C00080_c#-1000#1000#
	R01752	D-Glyceraldehyde + NAD+ + H2O <=> D-Glycerate + NADH + H+	C00577_c + C00003_c + C00001_c <=> C00258_c + C00004_c + C00080_c	D-Glyceraldehyde:NAD+ oxidoreductase	-1000	1000								R01752#D-Glyceraldehyde + NAD+ + H2O <=> D-Glycerate + NADH + H+#C00577_c + C00003_c + C00001_c <=> C00258_c + C00004_c + C00080_c#-1000#1000#
	R01778	(3S)-3-Hydroxyacyl-CoA + NAD+ <=> 3-Oxoacyl-CoA + NADH + H+	C00640_c + C00003_c <=> C00264_c + C00004_c + C00080_c	(3S)-3-hydroxyacyl-CoA:NAD+ oxidoreductase	-1000	1000								R01778#(3S)-3-Hydroxyacyl-CoA + NAD+ <=> 3-Oxoacyl-CoA + NADH + H+#C00640_c + C00003_c <=> C00264_c + C00004_c + C00080_c#-1000#1000#
	R01780	Succinyl-CoA + 3-Oxo acid <=> Succinate + 3-Oxoacyl-CoA	C00091_c + C01656_c <=> C00042_c + C00264_c	Succinyl-CoA:3-oxo-acid CoA-transferase	-1000	1000								R01780#Succinyl-CoA + 3-Oxo acid <=> Succinate + 3-Oxoacyl-CoA#C00091_c + C01656_c <=> C00042_c + C00264_c#-1000#1000#
	R01793	Dihydrobiopterin + NADH + H+ <=> Tetrahydrobiopterin + NAD+	C00268_c + C00004_c + C00080_c <=> C00272_c + C00003_c	5,6,7,8-tetrahydrobiopterin:NAD+ oxidoreductase	-1000	1000								R01793#Dihydrobiopterin + NADH + H+ <=> Tetrahydrobiopterin + NAD+#C00268_c + C00004_c + C00080_c <=> C00272_c + C00003_c#-1000#1000#
	R01794	Dihydrobiopterin + NADPH + H+ <=> Tetrahydrobiopterin + NADP+	C00268_c + C00005_c + C00080_c <=> C00272_c + C00006_c	5,6,7,8-tetrahydrobiopterin:NADP+ oxidoreductase	-1000	1000								R01794#Dihydrobiopterin + NADPH + H+ <=> Tetrahydrobiopterin + NADP+#C00268_c + C00005_c + C00080_c <=> C00272_c + C00006_c#-1000#1000#
	R01799	CTP + Phosphatidate <=> Diphosphate + CDP-diacylglycerol	C00063_c + C00416_c <=> C00013_c + C00269_c	CTP:phosphatidate cytidyltransferase	-1000	1000								R01799#CTP + Phosphatidate <=> Diphosphate + CDP-diacylglycerol#C00063_c + C00416_c <=> C00013_c + C00269_c#-1000#1000#
	R01802	CDP-diacylglycerol + myo-Inositol <=> CMP + 1-Phosphatidyl-D-myo-inositol	C00269_c + C00137_c <=> C00055_c + C01194_c	CDP-diacylglycerol:myo-inositol 3-phosphatidyltransferase	-1000	1000								R01802#CDP-diacylglycerol + myo-Inositol <=> CMP + 1-Phosphatidyl-D-myo-inositol#C00269_c + C00137_c <=> C00055_c + C01194_c#-1000#1000#
	R01818	D-Mannose 6-phosphate <=> D-Mannose 1-phosphate	C00275_c <=> C00636_c	D-mannose 6-phosphate 1,6-phosphomutase	-1000	1000								R01818#D-Mannose 6-phosphate <=> D-Mannose 1-phosphate#C00275_c <=> C00636_c#-1000#1000#
	R01819	D-Mannose 6-phosphate <=> beta-D-Fructose 6-phosphate	C00275_c <=> C05345_c	D-mannose-6-phosphate aldose-ketose-isomerase	-1000	1000								R01819#D-Mannose 6-phosphate <=> beta-D-Fructose 6-phosphate#C00275_c <=> C05345_c#-1000#1000#
	R01821	Amylose + Orthophosphate <=> Amylose + D-Glucose 1-phosphate	C00718_c + C00009_c <=> C00718_c + C00103_c	1,4-alpha-D-Glucan:orthophosphate alpha-D-glucosyltransferase	-1000	1000								R01821#Amylose + Orthophosphate <=> Amylose + D-Glucose 1-phosphate#C00718_c + C00009_c <=> C00718_c + C00103_c#-1000#1000#
	R01826	Phosphoenolpyruvate + D-Erythrose 4-phosphate + H2O <=> 2-Dehydro-3-deoxy-D-arabino-heptonate 7-phosphate + Orthophosphate	C00074_c + C00279_c + C00001_c <=> C04691_c + C00009_c	Phosphoenolpyruvate:D-erythrose-4-phosphate C-(1-carboxyvinyl)transferase (phosphate hydrolysing, 2-carboxy-2-oxoethyl-forming)	-1000	1000								R01826#Phosphoenolpyruvate + D-Erythrose 4-phosphate + H2O <=> 2-Dehydro-3-deoxy-D-arabino-heptonate 7-phosphate + Orthophosphate#C00074_c + C00279_c + C00001_c <=> C04691_c + C00009_c#-1000#1000#
	R01843	ATP + Sedoheptulose 7-phosphate <=> ADP + Sedoheptulose 1,7-bisphosphate	C00002_c + C05382_c <=> C00008_c + C00447_c	ATP:Sedoheptulose 7-phosphate 1-phosphotransferase	-1000	1000								R01843#ATP + Sedoheptulose 7-phosphate <=> ADP + Sedoheptulose 1,7-bisphosphate#C00002_c + C05382_c <=> C00008_c + C00447_c#-1000#1000#
	R01853	Primary amine + H2O + Oxygen <=> Aldehyde + Ammonia + Hydrogen peroxide	C00375_c + C00001_c + C00007_c <=> C00071_c + C00014_c + C00027_c	RCH2NH2:oxygen oxidoreductase(deaminating)(flavin-containing)	-1000	1000								R01853#Primary amine + H2O + Oxygen <=> Aldehyde + Ammonia + Hydrogen peroxide#C00375_c + C00001_c + C00007_c <=> C00071_c + C00014_c + C00027_c#-1000#1000#
	R01911	Pyridoxine + Orthophosphate <=> Pyridoxine phosphate + H2O	C00314_c + C00009_c <=> C00627_c + C00001_c	pyridoxine-5'-phosphate phosphohydrolase	-1000	1000								R01911#Pyridoxine + Orthophosphate <=> Pyridoxine phosphate + H2O#C00314_c + C00009_c <=> C00627_c + C00001_c#-1000#1000#
	R01920	S-Adenosylmethioninamine + Putrescine <=> 5'-Methylthioadenosine + Spermidine	C01137_c + C00134_c <=> C00170_c + C00315_c	S-adenosylmethioninamine:putrescine 3-aminopropyltransferase	-1000	1000								R01920#S-Adenosylmethioninamine + Putrescine <=> 5'-Methylthioadenosine + Spermidine#C01137_c + C00134_c <=> C00170_c + C00315_c#-1000#1000#
	R01931	Thiosulfate + Cyanide ion <=> Sulfite + Thiocyanate	C00320_c + C00177_c <=> C00094_c + C01755_c	thiosulfate:cyanide sulfurtranserase	-1000	1000								R01931#Thiosulfate + Cyanide ion <=> Sulfite + Thiocyanate#C00320_c + C00177_c <=> C00094_c + C01755_c#-1000#1000#
	R01933	2-Oxoadipate + CoA + NAD+ <=> Glutaryl-CoA + CO2 + NADH + H+	C00322_c + C00010_c + C00003_c <=> C00527_c + C00011_c + C00004_c + C00080_c	2-oxoadipate dehydrogenase complex	-1000	1000								R01933#2-Oxoadipate + CoA + NAD+ <=> Glutaryl-CoA + CO2 + NADH + H+#C00322_c + C00010_c + C00003_c <=> C00527_c + C00011_c + C00004_c + C00080_c#-1000#1000#
	R01968	dGMP + H2O <=> Deoxyguanosine + Orthophosphate	C00362_c + C00001_c <=> C00330_c + C00009_c	2'-deoxyguanosine 5'-monophosphate phosphohydrolase	-1000	1000								R01968#dGMP + H2O <=> Deoxyguanosine + Orthophosphate#C00362_c + C00001_c <=> C00330_c + C00009_c#-1000#1000#
	R01975	(S)-3-Hydroxybutanoyl-CoA + NAD+ <=> Acetoacetyl-CoA + NADH + H+	C01144_c + C00003_c <=> C00332_c + C00004_c + C00080_c	(S)-3-Hydroxybutanoyl-CoA:NAD+ oxidoreductase	-1000	1000								R01975#(S)-3-Hydroxybutanoyl-CoA + NAD+ <=> Acetoacetyl-CoA + NADH + H+#C01144_c + C00003_c <=> C00332_c + C00004_c + C00080_c#-1000#1000#
	R01976	(S)-3-Hydroxybutanoyl-CoA + NADP+ <=> Acetoacetyl-CoA + NADPH + H+	C01144_c + C00006_c <=> C00332_c + C00005_c + C00080_c	(S)-3-Hydroxybutanoyl-CoA:NADP+ oxidoreductase	-1000	1000								R01976#(S)-3-Hydroxybutanoyl-CoA + NADP+ <=> Acetoacetyl-CoA + NADPH + H+#C01144_c + C00006_c <=> C00332_c + C00005_c + C00080_c#-1000#1000#
	R01986	4-Aminobutyraldehyde + NADP+ + H2O <=> 4-Aminobutanoate + NADPH + H+	C00555_c + C00006_c + C00001_c <=> C00334_c + C00005_c + C00080_c	4-Aminobutyraldehyde:NAD+ oxidoreductase	-1000	1000								R01986#4-Aminobutyraldehyde + NADP+ + H2O <=> 4-Aminobutanoate + NADPH + H+#C00555_c + C00006_c + C00001_c <=> C00334_c + C00005_c + C00080_c#-1000#1000#
	R02003	Geranyl diphosphate + Isopentenyl diphosphate <=> Diphosphate + trans,trans-Farnesyl diphosphate	C00341_c + C00129_c <=> C00013_c + C00448_c	Geranyl-diphosphate:isopentenyl-diphosphate geranyltrans-transferase	-1000	1000								R02003#Geranyl diphosphate + Isopentenyl diphosphate <=> Diphosphate + trans,trans-Farnesyl diphosphate#C00341_c + C00129_c <=> C00013_c + C00448_c#-1000#1000#
	R02016	Thioredoxin + NADP+ <=> Thioredoxin disulfide + NADPH + H+	C00342_c + C00006_c <=> C00343_c + C00005_c + C00080_c	NADPH:oxidized-thioredoxin oxidoreductase	-1000	1000								R02016#Thioredoxin + NADP+ <=> Thioredoxin disulfide + NADPH + H+#C00342_c + C00006_c <=> C00343_c + C00005_c + C00080_c#-1000#1000#
	R02057	CDP-ethanolamine + 1,2-Diacyl-sn-glycerol <=> CMP + Phosphatidylethanolamine	C00570_c + C00641_c <=> C00055_c + C00350_c	CDPethanolamine:1,2-diacylglycerol ethanolaminephosphotransferase	-1000	1000								R02057#CDP-ethanolamine + 1,2-Diacyl-sn-glycerol <=> CMP + Phosphatidylethanolamine#C00570_c + C00641_c <=> C00055_c + C00350_c#-1000#1000#
	R02058	Acetyl-CoA + D-Glucosamine 6-phosphate <=> CoA + N-Acetyl-D-glucosamine 6-phosphate	C00024_c + C00352_c <=> C00010_c + C00357_c	acetyl-CoA:D-glucosamine-6-phosphate N-acetyltransferase	-1000	1000								R02058#Acetyl-CoA + D-Glucosamine 6-phosphate <=> CoA + N-Acetyl-D-glucosamine 6-phosphate#C00024_c + C00352_c <=> C00010_c + C00357_c#-1000#1000#
	R02061	trans,trans-Farnesyl diphosphate + Isopentenyl diphosphate <=> Diphosphate + Geranylgeranyl diphosphate	C00448_c + C00129_c <=> C00013_c + C00353_c	trans,trans-Farnesyl-diphosphate:isopentenyl-diphosphate farnesyltranstransferase	-1000	1000								R02061#trans,trans-Farnesyl diphosphate + Isopentenyl diphosphate <=> Diphosphate + Geranylgeranyl diphosphate#C00448_c + C00129_c <=> C00013_c + C00353_c#-1000#1000#
	R02080	3,4-Dihydroxy-L-phenylalanine <=> Dopamine + CO2	C00355_c <=> C03758_c + C00011_c	3,4-Dihydroxy-L-phenylalanine carboxy-lyase	-1000	1000								R02080#3,4-Dihydroxy-L-phenylalanine <=> Dopamine + CO2#C00355_c <=> C03758_c + C00011_c#-1000#1000#
	R02088	dAMP + H2O <=> Deoxyadenosine + Orthophosphate	C00360_c + C00001_c <=> C00559_c + C00009_c	2'-deoxyadenosine 5'-monophosphate phosphohydrolase	-1000	1000								R02088#dAMP + H2O <=> Deoxyadenosine + Orthophosphate#C00360_c + C00001_c <=> C00559_c + C00009_c#-1000#1000#
	R02102	dUMP + H2O <=> Deoxyuridine + Orthophosphate	C00365_c + C00001_c <=> C00526_c + C00009_c	2'-deoxyuridine 5'-monophosphate phosphohydrolase	-1000	1000								R02102#dUMP + H2O <=> Deoxyuridine + Orthophosphate#C00365_c + C00001_c <=> C00526_c + C00009_c#-1000#1000#
	R02108	Starch + H2O <=> Dextrin + Starch	C00369_c + C00001_c <=> C00721_c + C00369_c	1,4-alpha-D-Glucan glucanohydrolase	-1000	1000								R02108#Starch + H2O <=> Dextrin + Starch#C00369_c + C00001_c <=> C00721_c + C00369_c#-1000#1000#
	R02110	Amylose <=> Starch	C00718_c <=> C00369_c	1,4-alpha-D-Glucan:1,4-alpha-D-glucan 6-alpha-D-(1,4-alpha-D-glucano)-transferase	-1000	1000								R02110#Amylose <=> Starch#C00718_c <=> C00369_c#-1000#1000#
	R02111	Starch + Orthophosphate <=> Amylose + D-Glucose 1-phosphate	C00369_c + C00009_c <=> C00718_c + C00103_c	1,4-alpha-D-Glucan:orthophosphate alpha-D-glucosyltransferase	-1000	1000								R02111#Starch + Orthophosphate <=> Amylose + D-Glucose 1-phosphate#C00369_c + C00009_c <=> C00718_c + C00103_c#-1000#1000#
	R02115	Steryl ester + H2O <=> Sterol + Fatty acid	C01958_c + C00001_c <=> C00370_c + C00162_c	Steryl-ester acylhydrolase	-1000	1000								R02115#Steryl ester + H2O <=> Sterol + Fatty acid#C01958_c + C00001_c <=> C00370_c + C00162_c#-1000#1000#
	R02173	Tryptamine + H2O + Oxygen <=> Indole-3-acetaldehyde + Ammonia + Hydrogen peroxide	C00398_c + C00001_c + C00007_c <=> C00637_c + C00014_c + C00027_c	Tryptamine:oxygen oxidoreductase(deaminating)	-1000	1000								R02173#Tryptamine + H2O + Oxygen <=> Indole-3-acetaldehyde + Ammonia + Hydrogen peroxide#C00398_c + C00001_c + C00007_c <=> C00637_c + C00014_c + C00027_c#-1000#1000#
	R02199	L-Isoleucine + 2-Oxoglutarate <=> (S)-3-Methyl-2-oxopentanoic acid + L-Glutamate	C00407_c + C00026_c <=> C00671_c + C00025_c	L-Isoleucine:2-oxoglutarate aminotransferase	-1000	1000								R02199#L-Isoleucine + 2-Oxoglutarate <=> (S)-3-Methyl-2-oxopentanoic acid + L-Glutamate#C00407_c + C00026_c <=> C00671_c + C00025_c#-1000#1000#
	R02222	Stearoyl-CoA + 2 Ferrocytochrome b5 + Oxygen + 2 H+ <=> Oleoyl-CoA + 2 Ferricytochrome b5 + 2 H2O	C00412_c + 2 C00999_c + C00007_c + 2 C00080_c <=> C00510_c + 2 C00996_c + 2 C00001_c	steroyl-CoA,hydrogen-donor:oxygen oxidoreductase	-1000	1000								R02222#Stearoyl-CoA + 2 Ferrocytochrome b5 + Oxygen + 2 H+ <=> Oleoyl-CoA + 2 Ferricytochrome b5 + 2 H2O#C00412_c + 2 C00999_c + C00007_c + 2 C00080_c <=> C00510_c + 2 C00996_c + 2 C00001_c#-1000#1000#
	R02235	Dihydrofolate + NAD+ <=> Folate + NADH + H+	C00415_c + C00003_c <=> C00504_c + C00004_c + C00080_c	dihydrofolate:NAD+ oxidoreductase	-1000	1000								R02235#Dihydrofolate + NAD+ <=> Folate + NADH + H+#C00415_c + C00003_c <=> C00504_c + C00004_c + C00080_c#-1000#1000#
	R02236	Dihydrofolate + NADP+ <=> Folate + NADPH + H+	C00415_c + C00006_c <=> C00504_c + C00005_c + C00080_c	dihydrofolate:NADP+ oxidoreductase	-1000	1000								R02236#Dihydrofolate + NADP+ <=> Folate + NADPH + H+#C00415_c + C00006_c <=> C00504_c + C00005_c + C00080_c#-1000#1000#
	R02237	ATP + Dihydropteroate + L-Glutamate <=> ADP + Orthophosphate + Dihydrofolate	C00002_c + C00921_c + C00025_c <=> C00008_c + C00009_c + C00415_c	7,8-dihydropteroate:L-glutamate ligase (ADP-forming)	-1000	1000								R02237#ATP + Dihydropteroate + L-Glutamate <=> ADP + Orthophosphate + Dihydrofolate#C00002_c + C00921_c + C00025_c <=> C00008_c + C00009_c + C00415_c#-1000#1000#
	R02240	ATP + 1,2-Diacyl-sn-glycerol <=> ADP + Phosphatidate	C00002_c + C00641_c <=> C00008_c + C00416_c	ATP:1,2-diacylglycerol 3-phosphotransferase	-1000	1000								R02240#ATP + 1,2-Diacyl-sn-glycerol <=> ADP + Phosphatidate#C00002_c + C00641_c <=> C00008_c + C00416_c#-1000#1000#
	R02245	ATP + (R)-Mevalonate <=> ADP + (R)-5-Phosphomevalonate	C00002_c + C00418_c <=> C00008_c + C01107_c	ATP:(R)-mevalonate 5-phosphotransferase	-1000	1000								R02245#ATP + (R)-Mevalonate <=> ADP + (R)-5-Phosphomevalonate#C00002_c + C00418_c <=> C00008_c + C01107_c#-1000#1000#
	R02300	Folinic acid <=> 5,10-Methenyltetrahydrofolate + H2O	C03479_c <=> C00445_c + C00001_c	S-Aminomethyldihydrolipoylprotein:(6S)-tetrahydrofolate aminomethyltransferase (ammonia-forming)	-1000	1000								R02300#Folinic acid <=> 5,10-Methenyltetrahydrofolate + H2O#C03479_c <=> C00445_c + C00001_c#-1000#1000#
	R02313	N6-(L-1,3-Dicarboxypropyl)-L-lysine + NAD+ + H2O <=> L-Glutamate + L-2-Aminoadipate 6-semialdehyde + NADH + H+	C00449_c + C00003_c + C00001_c <=> C00025_c + C04076_c + C00004_c + C00080_c	N6-(L-1,3-Dicarboxypropyl)-L-lysine:NAD+ oxidoreductase	-1000	1000								R02313#N6-(L-1,3-Dicarboxypropyl)-L-lysine + NAD+ + H2O <=> L-Glutamate + L-2-Aminoadipate 6-semialdehyde + NADH + H+#C00449_c + C00003_c + C00001_c <=> C00025_c + C04076_c + C00004_c + C00080_c#-1000#1000#
	R02323	Nicotinamide D-ribonucleotide + H2O <=> Nicotinamide-beta-riboside + Orthophosphate	C00455_c + C00001_c <=> C03150_c + C00009_c	nicotinamide ribonucleotide phosphohydrolase	-1000	1000								R02323#Nicotinamide D-ribonucleotide + H2O <=> Nicotinamide-beta-riboside + Orthophosphate#C00455_c + C00001_c <=> C03150_c + C00009_c#-1000#1000#
	R02335	UDP-N-acetyl-alpha-D-glucosamine + Chitin <=> UDP + Chitin	C00043_c + C00461_c <=> C00015_c + C00461_c	UDP-N-acetyl-D-glucosamine:chitin 4-beta-N-acetylglucosaminyl-transferase	-1000	1000								R02335#UDP-N-acetyl-alpha-D-glucosamine + Chitin <=> UDP + Chitin#C00043_c + C00461_c <=> C00015_c + C00461_c#-1000#1000#
	R02352	Estradiol-17beta + NAD+ <=> Estrone + NADH + H+	C00951_c + C00003_c <=> C00468_c + C00004_c + C00080_c	Estradiol-17beta:NAD+ 17-oxidoreductase	-1000	1000								R02352#Estradiol-17beta + NAD+ <=> Estrone + NADH + H+#C00951_c + C00003_c <=> C00468_c + C00004_c + C00080_c#-1000#1000#
	R02353	Estradiol-17beta + NADP+ <=> Estrone + NADPH + H+	C00951_c + C00006_c <=> C00468_c + C00005_c + C00080_c	Estradiol-17beta:NADP+ 17-oxidoreductase	-1000	1000								R02353#Estradiol-17beta + NADP+ <=> Estrone + NADPH + H+#C00951_c + C00006_c <=> C00468_c + C00005_c + C00080_c#-1000#1000#
	R02382	Tyramine + H2O + Oxygen <=> 4-Hydroxyphenylacetaldehyde + Ammonia + Hydrogen peroxide	C00483_c + C00001_c + C00007_c <=> C03765_c + C00014_c + C00027_c	Tyramine:oxygen oxidoreductase(deaminating)(flavin-containing)	-1000	1000								R02382#Tyramine + H2O + Oxygen <=> 4-Hydroxyphenylacetaldehyde + Ammonia + Hydrogen peroxide#C00483_c + C00001_c + C00007_c <=> C03765_c + C00014_c + C00027_c#-1000#1000#
	R02408	L-Cystine + H2O <=> Pyruvate + Ammonia + Thiocysteine	C00491_c + C00001_c <=> C00022_c + C00014_c + C01962_c	L-Cystine L-Cysteine-lyase (deaminating)	-1000	1000								R02408#L-Cystine + H2O <=> Pyruvate + Ammonia + Thiocysteine#C00491_c + C00001_c <=> C00022_c + C00014_c + C01962_c#-1000#1000#
	R02421	ADP-glucose + Amylose <=> ADP + Amylose	C00498_c + C00718_c <=> C00008_c + C00718_c	ADP-glucose:1,4-alpha-D-glucan 4-alpha-D-glucosyltransferase	-1000	1000								R02421#ADP-glucose + Amylose <=> ADP + Amylose#C00498_c + C00718_c <=> C00008_c + C00718_c#-1000#1000#
	R02433	L-Cysteate + 2-Oxoglutarate <=> 3-Sulfopyruvate + L-Glutamate	C00506_c + C00026_c <=> C05528_c + C00025_c	L-cysteate:2-oxoglutarate aminotransferase	-1000	1000								R02433#L-Cysteate + 2-Oxoglutarate <=> 3-Sulfopyruvate + L-Glutamate#C00506_c + C00026_c <=> C05528_c + C00025_c#-1000#1000#
	R02464	Sphinganine 1-phosphate <=> Ethanolamine phosphate + Hexadecanal	C01120_c <=> C00346_c + C00517_c	Sphinganine-1-phosphate pamlmitaldehyde-lyase	-1000	1000								R02464#Sphinganine 1-phosphate <=> Ethanolamine phosphate + Hexadecanal#C01120_c <=> C00346_c + C00517_c#-1000#1000#
	R02488	Glutaryl-CoA + Electron-transferring flavoprotein <=> Crotonoyl-CoA + Reduced electron-transferring flavoprotein + CO2	C00527_c + C04253_c <=> C00877_c + C04570_c + C00011_c	glutaryl-CoA:electron-transfer flavoprotein 2,3-oxidoreductase (decarboxylating)	-1000	1000								R02488#Glutaryl-CoA + Electron-transferring flavoprotein <=> Crotonoyl-CoA + Reduced electron-transferring flavoprotein + CO2#C00527_c + C04253_c <=> C00877_c + C04570_c + C00011_c#-1000#1000#
	R02494	Pyridoxamine + Orthophosphate <=> Pyridoxamine phosphate + H2O	C00534_c + C00009_c <=> C00647_c + C00001_c	pyridoxamine-5'-phosphate phosphohydrolase	-1000	1000								R02494#Pyridoxamine + Orthophosphate <=> Pyridoxamine phosphate + H2O#C00534_c + C00009_c <=> C00647_c + C00001_c#-1000#1000#
	R02519	Homogentisate + Oxygen <=> 4-Maleylacetoacetate	C00544_c + C00007_c <=> C01036_c	Homogentisate:oxygen 1,2-oxidoreductase (decyclizing)	-1000	1000								R02519#Homogentisate + Oxygen <=> 4-Maleylacetoacetate#C00544_c + C00007_c <=> C01036_c#-1000#1000#
	R02529	Aminoacetone + H2O + Oxygen <=> Methylglyoxal + Ammonia + Hydrogen peroxide	C01888_c + C00001_c + C00007_c <=> C00546_c + C00014_c + C00027_c	aminoacetone:oxygen oxidoreductase(deaminating)	-1000	1000								R02529#Aminoacetone + H2O + Oxygen <=> Methylglyoxal + Ammonia + Hydrogen peroxide#C01888_c + C00001_c + C00007_c <=> C00546_c + C00014_c + C00027_c#-1000#1000#
	R02532	L-Noradrenaline + H2O + Oxygen <=> 3,4-Dihydroxymandelaldehyde + Ammonia + Hydrogen peroxide	C00547_c + C00001_c + C00007_c <=> C05577_c + C00014_c + C00027_c	4-[(1R)-2-Amino-1-hydroxyethyl]-1,2-benzenediol:oxygen oxidoreductase(deaminating)(flavin-containing)	-1000	1000								R02532#L-Noradrenaline + H2O + Oxygen <=> 3,4-Dihydroxymandelaldehyde + Ammonia + Hydrogen peroxide#C00547_c + C00001_c + C00007_c <=> C05577_c + C00014_c + C00027_c#-1000#1000#
	R02541	Sphingomyelin + H2O <=> N-Acylsphingosine + Choline phosphate	C00550_c + C00001_c <=> C00195_c + C00588_c	Sphingomyelin cholinephosphohydrolase	-1000	1000								R02541#Sphingomyelin + H2O <=> N-Acylsphingosine + Choline phosphate#C00550_c + C00001_c <=> C00195_c + C00588_c#-1000#1000#
	R02549	4-Aminobutyraldehyde + NAD+ + H2O <=> 4-Aminobutanoate + NADH + H+	C00555_c + C00003_c + C00001_c <=> C00334_c + C00004_c + C00080_c	4-aminobutanal:NAD+ 1-oxidoreductase	-1000	1000								R02549#4-Aminobutyraldehyde + NAD+ + H2O <=> 4-Aminobutanoate + NADH + H+#C00555_c + C00003_c + C00001_c <=> C00334_c + C00004_c + C00080_c#-1000#1000#
	R02568	D-Fructose 1-phosphate <=> Glycerone phosphate + D-Glyceraldehyde	C01094_c <=> C00111_c + C00577_c	D-fructose 1-phosphate D-glyceraldehyde-3-phosphate-lyase	-1000	1000								R02568#D-Fructose 1-phosphate <=> Glycerone phosphate + D-Glyceraldehyde#C01094_c <=> C00111_c + C00577_c#-1000#1000#
	R02570	Succinyl-CoA + Enzyme N6-(dihydrolipoyl)lysine <=> CoA + [Dihydrolipoyllysine-residue succinyltransferase] S-succinyldihydrolipoyllysine	C00091_c + C15973_c <=> C00010_c + C16254_c	succinyl-CoA:enzyme N6-(dihydrolipoyl)lysine S-succinyltransferase	-1000	1000								R02570#Succinyl-CoA + Enzyme N6-(dihydrolipoyl)lysine <=> CoA + [Dihydrolipoyllysine-residue succinyltransferase] S-succinyldihydrolipoyllysine#C00091_c + C15973_c <=> C00010_c + C16254_c#-1000#1000#
	R02585	Protein tyrosine phosphate + H2O <=> Protein tyrosine + Orthophosphate	C01167_c + C00001_c <=> C00585_c + C00009_c	Protein-tyrosine-phosphate phosphohydrolase	-1000	1000								R02585#Protein tyrosine phosphate + H2O <=> Protein tyrosine + Orthophosphate#C01167_c + C00001_c <=> C00585_c + C00009_c#-1000#1000#
	R02613	Phenethylamine + Oxygen + H2O <=> Phenylacetaldehyde + Ammonia + Hydrogen peroxide	C05332_c + C00007_c + C00001_c <=> C00601_c + C00014_c + C00027_c	Phenethylamine:oxygen oxidoreductase (deaminating)	-1000	1000								R02613#Phenethylamine + Oxygen + H2O <=> Phenylacetaldehyde + Ammonia + Hydrogen peroxide#C05332_c + C00007_c + C00001_c <=> C00601_c + C00014_c + C00027_c#-1000#1000#
	R02619	3-Sulfino-L-alanine + 2-Oxoglutarate <=> 3-Sulfinylpyruvate + L-Glutamate	C00606_c + C00026_c <=> C05527_c + C00025_c	3-sulfino-L-alanine:2-oxoglutarate aminotransferase	-1000	1000								R02619#3-Sulfino-L-alanine + 2-Oxoglutarate <=> 3-Sulfinylpyruvate + L-Glutamate#C00606_c + C00026_c <=> C05527_c + C00025_c#-1000#1000#
	R02654	UDP-N-acetyl-alpha-D-glucosamine + 1-Phosphatidyl-D-myo-inositol <=> UDP + N-Acetyl-D-glucosaminylphosphatidylinositol	C00043_c + C01194_c <=> C00015_c + C01288_c	UDP-N-acetyl-D-glucosamine:phosphatidylinositol N-acetyl-D-glucosaminyltransferase	-1000	1000								R02654#UDP-N-acetyl-alpha-D-glucosamine + 1-Phosphatidyl-D-myo-inositol <=> UDP + N-Acetyl-D-glucosaminylphosphatidylinositol#C00043_c + C01194_c <=> C00015_c + C01288_c#-1000#1000#
	R02670	2 3-Hydroxyanthranilate + 4 Oxygen <=> Cinnavalininate + 2 O2.- + 2 Hydrogen peroxide + 2 H+	2 C00632_c + 4 C00007_c <=> C05640_c + 2 C00704_c + 2 C00027_c + 2 C00080_c		-1000	1000								R02670#2 3-Hydroxyanthranilate + 4 Oxygen <=> Cinnavalininate + 2 O2.- + 2 Hydrogen peroxide + 2 H+#2 C00632_c + 4 C00007_c <=> C05640_c + 2 C00704_c + 2 C00027_c + 2 C00080_c#-1000#1000#
	R02678	Indole-3-acetaldehyde + NAD+ + H2O <=> Indole-3-acetate + NADH + H+	C00637_c + C00003_c + C00001_c <=> C00954_c + C00004_c + C00080_c	Indole-3-acetaldehyde:NAD+ oxidoreductase	-1000	1000								R02678#Indole-3-acetaldehyde + NAD+ + H2O <=> Indole-3-acetate + NADH + H+#C00637_c + C00003_c + C00001_c <=> C00954_c + C00004_c + C00080_c#-1000#1000#
	R02685	(3S)-3-Hydroxyacyl-CoA <=> trans-2,3-Dehydroacyl-CoA + H2O	C00640_c <=> C00658_c + C00001_c	(3S)-3-hydroxyacyl-CoA hydro-lyase	-1000	1000								R02685#(3S)-3-Hydroxyacyl-CoA <=> trans-2,3-Dehydroacyl-CoA + H2O#C00640_c <=> C00658_c + C00001_c#-1000#1000#
	R02719	Xanthosine 5'-phosphate + H2O <=> Xanthosine + Orthophosphate	C00655_c + C00001_c <=> C01762_c + C00009_c	xanthosine 5'-phosphate phosphohydrolase	-1000	1000								R02719#Xanthosine 5'-phosphate + H2O <=> Xanthosine + Orthophosphate#C00655_c + C00001_c <=> C01762_c + C00009_c#-1000#1000#
	R02735	LL-2,6-Diaminoheptanedioate <=> meso-2,6-Diaminoheptanedioate	C00666_c <=> C00680_c	LL-2,6-Diaminoheptanedioate 2-epimerase	-1000	1000								R02735#LL-2,6-Diaminoheptanedioate <=> meso-2,6-Diaminoheptanedioate#C00666_c <=> C00680_c#-1000#1000#
	R02814	Oleoyl-[acyl-carrier protein] + H2O <=> Acyl-carrier protein + (9Z)-Octadecenoic acid	C01203_c + C00001_c <=> C00229_c + C00712_c	Oleoyl-[acyl-carrier-protein] hydrolase	-1000	1000								R02814#Oleoyl-[acyl-carrier protein] + H2O <=> Acyl-carrier protein + (9Z)-Octadecenoic acid#C01203_c + C00001_c <=> C00229_c + C00712_c#-1000#1000#
	R02908	Serotonin + H2O + Oxygen <=> 5-Hydroxyindoleacetaldehyde + Ammonia + Hydrogen peroxide	C00780_c + C00001_c + C00007_c <=> C05634_c + C00014_c + C00027_c	5-Hydroxytryptamine:oxygen oxidoreductase(deaminating)(flavin-containing)	-1000	1000								R02908#Serotonin + H2O + Oxygen <=> 5-Hydroxyindoleacetaldehyde + Ammonia + Hydrogen peroxide#C00780_c + C00001_c + C00007_c <=> C05634_c + C00014_c + C00027_c#-1000#1000#
	R02919	L-Adrenaline + H2O + Oxygen <=> 3,4-Dihydroxymandelaldehyde + Methylamine + Hydrogen peroxide	C00788_c + C00001_c + C00007_c <=> C05577_c + C00218_c + C00027_c	4-[(1R)-1-Hydroxy-2-(methylamino)ethyl]-1,2-benzenediol:oxygen oxidoreductase(deaminating)(flavin-containing)	-1000	1000								R02919#L-Adrenaline + H2O + Oxygen <=> 3,4-Dihydroxymandelaldehyde + Methylamine + Hydrogen peroxide#C00788_c + C00001_c + C00007_c <=> C05577_c + C00218_c + C00027_c#-1000#1000#
	R02926	Melibiitol + H2O <=> D-Sorbitol + D-Galactose	C05399_c + C00001_c <=> C00794_c + C00124_c	Melibiitol galactohydrolase	-1000	1000								R02926#Melibiitol + H2O <=> D-Sorbitol + D-Galactose#C05399_c + C00001_c <=> C00794_c + C00124_c#-1000#1000#
	R02940	2-Propynal + NAD+ + H2O <=> Propynoate + NADH + H+	C05985_c + C00003_c + C00001_c <=> C00804_c + C00004_c + C00080_c	2-Propyn-1-al:NAD+ oxidoreductase	-1000	1000								R02940#2-Propynal + NAD+ + H2O <=> Propynoate + NADH + H+#C05985_c + C00003_c + C00001_c <=> C00804_c + C00004_c + C00080_c#-1000#1000#
	R02957	D-Glucuronolactone + NAD+ + 2 H2O <=> D-Glucarate + NADH + H+	C02670_c + C00003_c + 2 C00001_c <=> C00818_c + C00004_c + C00080_c	D-Glucuronolactone:NAD+ oxidoreductase	-1000	1000								R02957#D-Glucuronolactone + NAD+ + 2 H2O <=> D-Glucarate + NADH + H+#C02670_c + C00003_c + 2 C00001_c <=> C00818_c + C00004_c + C00080_c#-1000#1000#
	R02971	ATP + Pantetheine <=> ADP + Pantetheine 4'-phosphate	C00002_c + C00831_c <=> C00008_c + C01134_c	ATP:pantothenate 4'-phosphotransferase	-1000	1000								R02971#ATP + Pantetheine <=> ADP + Pantetheine 4'-phosphate#C00002_c + C00831_c <=> C00008_c + C01134_c#-1000#1000#
	R03024	4-Nitrophenyl phosphate + H2O <=> 4-Nitrophenol + Orthophosphate	C03360_c + C00001_c <=> C00870_c + C00009_c	4-Nitrophenyl phosphate phosphohydrolase	-1000	1000								R03024#4-Nitrophenyl phosphate + H2O <=> 4-Nitrophenol + Orthophosphate#C03360_c + C00001_c <=> C00870_c + C00009_c#-1000#1000#
	R03026	(S)-3-Hydroxybutanoyl-CoA <=> Crotonoyl-CoA + H2O	C01144_c <=> C00877_c + C00001_c	(S)-3-hydroxybutanoyl-CoA hydro-lyase	-1000	1000								R03026#(S)-3-Hydroxybutanoyl-CoA <=> Crotonoyl-CoA + H2O#C01144_c <=> C00877_c + C00001_c#-1000#1000#
	R03045	3-Hydroxypropionyl-CoA <=> Propenoyl-CoA + H2O	C05668_c <=> C00894_c + C00001_c	3-Hydroxypropionyl-CoA hydro-lyase	-1000	1000								R03045#3-Hydroxypropionyl-CoA <=> Propenoyl-CoA + H2O#C05668_c <=> C00894_c + C00001_c#-1000#1000#
	R03057	Leukotriene A4 + H2O <=> Leukotriene B4	C00909_c + C00001_c <=> C02165_c	(7E,9E,11Z,14Z)-(5S,6S)-5,6-Epoxyicosa-7,9,11,14-tetraenoate hydrolase	-1000	1000								R03057#Leukotriene A4 + H2O <=> Leukotriene B4#C00909_c + C00001_c <=> C02165_c#-1000#1000#
	R03077	UTP + beta-L-Arabinose 1-phosphate <=> Diphosphate + UDP-L-arabinose	C00075_c + C03906_c <=> C00013_c + C00935_c	UTP:beta-L-arabinose-1-phosphate uridylyltransferase	-1000	1000								R03077#UTP + beta-L-Arabinose 1-phosphate <=> Diphosphate + UDP-L-arabinose#C00075_c + C03906_c <=> C00013_c + C00935_c#-1000#1000#
	R03102	L-2-Aminoadipate 6-semialdehyde + NAD+ + H2O <=> L-2-Aminoadipate + NADH + H+	C04076_c + C00003_c + C00001_c <=> C00956_c + C00004_c + C00080_c	L-2-Aminoadipate-6-semialdehyde:NAD+ 6-oxidoreductase	-1000	1000								R03102#L-2-Aminoadipate 6-semialdehyde + NAD+ + H2O <=> L-2-Aminoadipate + NADH + H+#C04076_c + C00003_c + C00001_c <=> C00956_c + C00004_c + C00080_c#-1000#1000#
	R03105	Mercaptopyruvate + Sulfite <=> Thiosulfate + Pyruvate	C00957_c + C00094_c <=> C00320_c + C00022_c	3-Mercaptopyruvate:cyanide sulfurtransferase	-1000	1000								R03105#Mercaptopyruvate + Sulfite <=> Thiosulfate + Pyruvate#C00957_c + C00094_c <=> C00320_c + C00022_c#-1000#1000#
	R03106	Hydrogen cyanide + Mercaptopyruvate <=> Thiocyanate + Pyruvate	C01326_c + C00957_c <=> C01755_c + C00022_c	3-mercaptopyruvate:cyanide sulfurtransferase	-1000	1000								R03106#Hydrogen cyanide + Mercaptopyruvate <=> Thiocyanate + Pyruvate#C01326_c + C00957_c <=> C01755_c + C00022_c#-1000#1000#
	R03132	O-Acetyl-L-serine + Thiosulfate <=> S-Sulfo-L-cysteine + Acetate	C00979_c + C00320_c <=> C05824_c + C00033_c	O3-acetyl-L-serine acetate-lyase (adding hydrogen sulfide)	-1000	1000								R03132#O-Acetyl-L-serine + Thiosulfate <=> S-Sulfo-L-cysteine + Acetate#C00979_c + C00320_c <=> C05824_c + C00033_c#-1000#1000#
	R03181	4-Maleylacetoacetate <=> 4-Fumarylacetoacetate	C01036_c <=> C01061_c	4-Maleylacetoacetate cis-trans-isomerase	-1000	1000								R03181#4-Maleylacetoacetate <=> 4-Fumarylacetoacetate#C01036_c <=> C01061_c#-1000#1000#
	R03197	Uroporphyrinogen III <=> Coproporphyrinogen III + 4 CO2	C01051_c <=> C03263_c + 4 C00011_c	Uroporphyrinogen-III carboxy-lyase	-1000	1000								R03197#Uroporphyrinogen III <=> Coproporphyrinogen III + 4 CO2#C01051_c <=> C03263_c + 4 C00011_c#-1000#1000#
	R03220	Coproporphyrinogen III + Oxygen <=> Protoporphyrinogen IX + 2 CO2 + 2 H2O	C03263_c + C00007_c <=> C01079_c + 2 C00011_c + 2 C00001_c	Coproporphyrinogen:oxygen oxidoreductase(decarboxylating)	-1000	1000								R03220#Coproporphyrinogen III + Oxygen <=> Protoporphyrinogen IX + 2 CO2 + 2 H2O#C03263_c + C00007_c <=> C01079_c + 2 C00011_c + 2 C00001_c#-1000#1000#
	R03222	Protoporphyrinogen IX + 3 Oxygen <=> Protoporphyrin + 3 Hydrogen peroxide	C01079_c + 3 C00007_c <=> C02191_c + 3 C00027_c	protoporphyrinogen-IX:oxygen oxidoreductase	-1000	1000								R03222#Protoporphyrinogen IX + 3 Oxygen <=> Protoporphyrin + 3 Hydrogen peroxide#C01079_c + 3 C00007_c <=> C02191_c + 3 C00027_c#-1000#1000#
	R03224	(3R)-3-Hydroxyacyl-CoA <=> cis-2,3-Dehydroacyl-CoA + H2O	C01086_c <=> C01122_c + C00001_c	(3R)-3-Hydroxyacyl-CoA hydro-lyase	-1000	1000								R03224#(3R)-3-Hydroxyacyl-CoA <=> cis-2,3-Dehydroacyl-CoA + H2O#C01086_c <=> C01122_c + C00001_c#-1000#1000#
	R03236	D-Tagatose 6-phosphate + ATP <=> D-Tagatose 1,6-bisphosphate + ADP	C01097_c + C00002_c <=> C03785_c + C00008_c	ATP:D-tagatose-6-phosphate 1-phosphotransferase	-1000	1000								R03236#D-Tagatose 6-phosphate + ATP <=> D-Tagatose 1,6-bisphosphate + ADP#C01097_c + C00002_c <=> C03785_c + C00008_c#-1000#1000#
	R03237	CTP + D-Tagatose 6-phosphate <=> CDP + D-Tagatose 1,6-bisphosphate	C00063_c + C01097_c <=> C00112_c + C03785_c	CTP:D-tagatose 6-phosphate 1-phosphotransferase	-1000	1000								R03237#CTP + D-Tagatose 6-phosphate <=> CDP + D-Tagatose 1,6-bisphosphate#C00063_c + C01097_c <=> C00112_c + C03785_c#-1000#1000#
	R03238	UTP + D-Tagatose 6-phosphate <=> UDP + D-Tagatose 1,6-bisphosphate	C00075_c + C01097_c <=> C00015_c + C03785_c	UTP:D-tagatose 6-phosphate 1-phosphotransferase	-1000	1000								R03238#UTP + D-Tagatose 6-phosphate <=> UDP + D-Tagatose 1,6-bisphosphate#C00075_c + C01097_c <=> C00015_c + C03785_c#-1000#1000#
	R03239	ITP + D-Tagatose 6-phosphate <=> IDP + D-Tagatose 1,6-bisphosphate	C00081_c + C01097_c <=> C00104_c + C03785_c	ITP:D-tagatose 6-phosphate 1-phosphotransferase	-1000	1000								R03239#ITP + D-Tagatose 6-phosphate <=> IDP + D-Tagatose 1,6-bisphosphate#C00081_c + C01097_c <=> C00104_c + C03785_c#-1000#1000#
	R03245	ATP + (R)-5-Phosphomevalonate <=> ADP + (R)-5-Diphosphomevalonate	C00002_c + C01107_c <=> C00008_c + C01143_c	ATP:(R)-5-phosphomevalonate phosphotransferase	-1000	1000								R03245#ATP + (R)-5-Phosphomevalonate <=> ADP + (R)-5-Diphosphomevalonate#C00002_c + C01107_c <=> C00008_c + C01143_c#-1000#1000#
	R03269	(R)-4'-Phosphopantothenoyl-L-cysteine <=> Pantetheine 4'-phosphate + CO2	C04352_c <=> C01134_c + C00011_c	N-[(R)-4'-Phosphopantothenoyl]-L-cysteine carboxy-lyase	-1000	1000								R03269#(R)-4'-Phosphopantothenoyl-L-cysteine <=> Pantetheine 4'-phosphate + CO2#C04352_c <=> C01134_c + C00011_c#-1000#1000#
	R03283	4-Trimethylammoniobutanal + NAD+ + H2O <=> 4-Trimethylammoniobutanoate + NADH + H+	C01149_c + C00003_c + C00001_c <=> C01181_c + C00004_c + C00080_c	4-Trimethylammoniobutanal:NAD+ 1-oxidoreductase	-1000	1000								R03283#4-Trimethylammoniobutanal + NAD+ + H2O <=> 4-Trimethylammoniobutanoate + NADH + H+#C01149_c + C00003_c + C00001_c <=> C01181_c + C00004_c + C00080_c#-1000#1000#
	R03330	D-myo-Inositol 1,3-bisphosphate + H2O <=> Inositol 1-phosphate + Orthophosphate	C04062_c + C00001_c <=> C01177_c + C00009_c	D-myo-Inositol-1,3-bisphosphate 3-phosphohydrolase	-1000	1000								R03330#D-myo-Inositol 1,3-bisphosphate + H2O <=> Inositol 1-phosphate + Orthophosphate#C04062_c + C00001_c <=> C01177_c + C00009_c#-1000#1000#
	R03332	1-Phosphatidyl-D-myo-inositol + H2O <=> Inositol 1-phosphate + 1,2-Diacyl-sn-glycerol	C01194_c + C00001_c <=> C01177_c + C00641_c	1-Phosphatidyl-D-myo-inositol inositolphosphohydrolase	-1000	1000								R03332#1-Phosphatidyl-D-myo-inositol + H2O <=> Inositol 1-phosphate + 1,2-Diacyl-sn-glycerol#C01194_c + C00001_c <=> C01177_c + C00641_c#-1000#1000#
	R03346	Nicotinate D-ribonucleotide + H2O <=> Nicotinate D-ribonucleoside + Orthophosphate	C01185_c + C00001_c <=> C05841_c + C00009_c	nicotinate D-ribonucleotide phosphohydrolase	-1000	1000								R03346#Nicotinate D-ribonucleotide + H2O <=> Nicotinate D-ribonucleoside + Orthophosphate#C01185_c + C00001_c <=> C05841_c + C00009_c#-1000#1000#
	R03353	Lathosterol <=> 5alpha-Cholest-8-en-3beta-ol	C01189_c <=> C03845_c	5alpha-Cholest-7-en-3beta-ol delta7-delta8-isomerase	-1000	1000								R03353#Lathosterol <=> 5alpha-Cholest-8-en-3beta-ol#C01189_c <=> C03845_c#-1000#1000#
	R03355	beta-D-Galactosyl-(1->4)-beta-D-glucosyl-(1<->1)-ceramide + H2O <=> beta-D-Glucosyl-(1<->1)-ceramide + D-Galactose	C01290_c + C00001_c <=> C01190_c + C00124_c	beta-D-Galactosyl-1,4-beta-D-glucosylceramide galactohydrolase	-1000	1000								R03355#beta-D-Galactosyl-(1->4)-beta-D-glucosyl-(1<->1)-ceramide + H2O <=> beta-D-Glucosyl-(1<->1)-ceramide + D-Galactose#C01290_c + C00001_c <=> C01190_c + C00124_c#-1000#1000#
	R03361	ATP + 1-Phosphatidyl-D-myo-inositol <=> ADP + 1-Phosphatidyl-1D-myo-inositol 4-phosphate	C00002_c + C01194_c <=> C00008_c + C01277_c	ATP:1-Phosphatidyl-1D-myo-inositol 4-phosphotransferase	-1000	1000								R03361#ATP + 1-Phosphatidyl-D-myo-inositol <=> ADP + 1-Phosphatidyl-1D-myo-inositol 4-phosphate#C00002_c + C01194_c <=> C00008_c + C01277_c#-1000#1000#
	R03362	ATP + 1-Phosphatidyl-D-myo-inositol <=> ADP + 1-Phosphatidyl-1D-myo-inositol 3-phosphate	C00002_c + C01194_c <=> C00008_c + C04549_c	ATP:1-phosphatidyl-1D-myo-inositol 3-phosphotransferase	-1000	1000								R03362#ATP + 1-Phosphatidyl-D-myo-inositol <=> ADP + 1-Phosphatidyl-1D-myo-inositol 3-phosphate#C00002_c + C01194_c <=> C00008_c + C04549_c#-1000#1000#
	R03363	1-Phosphatidyl-1D-myo-inositol 3-phosphate + H2O <=> 1-Phosphatidyl-D-myo-inositol + Orthophosphate	C04549_c + C00001_c <=> C01194_c + C00009_c	1-Phosphatidyl-1D-myo-inositol 3-phosphate 3-phosphohydrolase	-1000	1000								R03363#1-Phosphatidyl-1D-myo-inositol 3-phosphate + H2O <=> 1-Phosphatidyl-D-myo-inositol + Orthophosphate#C04549_c + C00001_c <=> C01194_c + C00009_c#-1000#1000#
	R03364	1-Phosphatidyl-D-myo-inositol <=> D-myo-Inositol 1,2-cyclic phosphate + 1,2-Diacyl-sn-glycerol	C01194_c <=> C04299_c + C00641_c	1-Phosphatidyl-D-myo-inositol inositolphosphohydrolase (cyclic-phosphate-forming)	-1000	1000								R03364#1-Phosphatidyl-D-myo-inositol <=> D-myo-Inositol 1,2-cyclic phosphate + 1,2-Diacyl-sn-glycerol#C01194_c <=> C04299_c + C00641_c#-1000#1000#
	R03370	Octadecanoyl-[acyl-carrier protein] + Reduced acceptor + Oxygen <=> Oleoyl-[acyl-carrier protein] + Acceptor + 2 H2O	C04088_c + C00030_c + C00007_c <=> C01203_c + C00028_c + 2 C00001_c	Acyl-[acyl-carrier-protein],hydrogen-donor:oxygen oxidoreductase	-1000	1000								R03370#Octadecanoyl-[acyl-carrier protein] + Reduced acceptor + Oxygen <=> Oleoyl-[acyl-carrier protein] + Acceptor + 2 H2O#C04088_c + C00030_c + C00007_c <=> C01203_c + C00028_c + 2 C00001_c#-1000#1000#
	R03425	Glycine + Lipoylprotein <=> S-Aminomethyldihydrolipoylprotein + CO2	C00037_c + C02051_c <=> C01242_c + C00011_c	glycine:lipoylprotein oxidoreductase (decarboxylating and acceptor-aminomethylating)	-1000	1000								R03425#Glycine + Lipoylprotein <=> S-Aminomethyldihydrolipoylprotein + CO2#C00037_c + C02051_c <=> C01242_c + C00011_c#-1000#1000#
	R03428	ATP + 1D-myo-Inositol 1,3,4-trisphosphate <=> ADP + 1D-myo-Inositol 1,3,4,5-tetrakisphosphate	C00002_c + C01243_c <=> C00008_c + C01272_c	ATP:1D-myo-inositol-1,3,4-trisphosphate 5-phosphotransferase	-1000	1000								R03428#ATP + 1D-myo-Inositol 1,3,4-trisphosphate <=> ADP + 1D-myo-Inositol 1,3,4,5-tetrakisphosphate#C00002_c + C01243_c <=> C00008_c + C01272_c#-1000#1000#
	R03429	ATP + 1D-myo-Inositol 1,3,4-trisphosphate <=> ADP + 1D-myo-Inositol 1,3,4,6-tetrakisphosphate	C00002_c + C01243_c <=> C00008_c + C04477_c	ATP:1D-myo-inositol-1,3,4-trisphosphate 6-phosphotransferase	-1000	1000								R03429#ATP + 1D-myo-Inositol 1,3,4-trisphosphate <=> ADP + 1D-myo-Inositol 1,3,4,6-tetrakisphosphate#C00002_c + C01243_c <=> C00008_c + C04477_c#-1000#1000#
	R03435	1-Phosphatidyl-D-myo-inositol 4,5-bisphosphate + H2O <=> D-myo-Inositol 1,4,5-trisphosphate + 1,2-Diacyl-sn-glycerol	C04637_c + C00001_c <=> C01245_c + C00641_c	1-Phosphatidyl-1D-myo-inositol-4,5-bisphosphate inositoltrisphosphohydrolase	-1000	1000								R03435#1-Phosphatidyl-D-myo-inositol 4,5-bisphosphate + H2O <=> D-myo-Inositol 1,4,5-trisphosphate + 1,2-Diacyl-sn-glycerol#C04637_c + C00001_c <=> C01245_c + C00641_c#-1000#1000#
	R03469	ATP + 1-Phosphatidyl-1D-myo-inositol 4-phosphate <=> ADP + 1-Phosphatidyl-D-myo-inositol 4,5-bisphosphate	C00002_c + C01277_c <=> C00008_c + C04637_c	ATP:1-phosphatidyl-1D-myo-inositol-4-phosphate 5-phosphotransferase	-1000	1000								R03469#ATP + 1-Phosphatidyl-1D-myo-inositol 4-phosphate <=> ADP + 1-Phosphatidyl-D-myo-inositol 4,5-bisphosphate#C00002_c + C01277_c <=> C00008_c + C04637_c#-1000#1000#
	R03479	ATP + 1D-myo-Inositol 3,4,5,6-tetrakisphosphate <=> ADP + 1D-myo-Inositol 1,3,4,5,6-pentakisphosphate	C00002_c + C04520_c <=> C00008_c + C01284_c	ATP:1D-myo-inositol-3,4,5,6-tetrakisphosphate 1-phosphotransferase	-1000	1000								R03479#ATP + 1D-myo-Inositol 3,4,5,6-tetrakisphosphate <=> ADP + 1D-myo-Inositol 1,3,4,5,6-pentakisphosphate#C00002_c + C04520_c <=> C00008_c + C01284_c#-1000#1000#
	R03482	N-Acetyl-D-glucosaminylphosphatidylinositol + H2O <=> 6-(alpha-D-Glucosaminyl)-1-phosphatidyl-1D-myo-inositol + Acetate	C01288_c + C00001_c <=> C04248_c + C00033_c	N-Acetyl-D-glucosaminylphosphatidylinositol acetyhydrolase	-1000	1000								R03482#N-Acetyl-D-glucosaminylphosphatidylinositol + H2O <=> 6-(alpha-D-Glucosaminyl)-1-phosphatidyl-1D-myo-inositol + Acetate#C01288_c + C00001_c <=> C04248_c + C00033_c#-1000#1000#
	R03522	RX + Glutathione <=> Halide + R-S-Glutathione	C01322_c + C00051_c <=> C00462_c + C02320_c	RX:glutathione R-transferase	-1000	1000								R03522#RX + Glutathione <=> Halide + R-S-Glutathione#C01322_c + C00051_c <=> C00462_c + C02320_c#-1000#1000#
	R03595	ATP + Hydrogen selenide + H2O <=> AMP + Selenophosphoric acid + Orthophosphate	C00002_c + C01528_c + C00001_c <=> C00020_c + C05172_c + C00009_c	ATP:selenide, water phosphotransferase	-1000	1000								R03595#ATP + Hydrogen selenide + H2O <=> AMP + Selenophosphoric acid + Orthophosphate#C00002_c + C01528_c + C00001_c <=> C00020_c + C05172_c + C00009_c#-1000#1000#
	R03601	O-Acetyl-L-serine + Hydrogen selenide <=> L-Selenocysteine + Acetate	C00979_c + C01528_c <=> C05688_c + C00033_c	O3-Acetyl-L-serine acetate-lyase (adding hydrogen sulfide)	-1000	1000								R03601#O-Acetyl-L-serine + Hydrogen selenide <=> L-Selenocysteine + Acetate#C00979_c + C01528_c <=> C05688_c + C00033_c#-1000#1000#
	R03632	ATP + Protamine <=> ADP + O-Phosphoprotamine	C00002_c + C01609_c <=> C00008_c + C02729_c	ATP:protamine O-phosphotransferase	-1000	1000								R03632#ATP + Protamine <=> ADP + O-Phosphoprotamine#C00002_c + C01609_c <=> C00008_c + C02729_c#-1000#1000#
	R03634	Stachyose + H2O <=> Raffinose + D-Galactose	C01613_c + C00001_c <=> C00492_c + C00124_c		-1000	1000								R03634#Stachyose + H2O <=> Raffinose + D-Galactose#C01613_c + C00001_c <=> C00492_c + C00124_c#-1000#1000#
	R03659	ATP + L-Methionine + tRNA(Met) <=> AMP + Diphosphate + L-Methionyl-tRNA	C00002_c + C00073_c + C01647_c <=> C00020_c + C00013_c + C02430_c	L-Methionine:tRNAMet ligase (AMP-forming)	-1000	1000								R03659#ATP + L-Methionine + tRNA(Met) <=> AMP + Diphosphate + L-Methionyl-tRNA#C00002_c + C00073_c + C01647_c <=> C00020_c + C00013_c + C02430_c#-1000#1000#
	R03719	Propanoyl-CoA + Choloyl-CoA <=> CoA + 3alpha,7alpha,12alpha-Trihydroxy-5beta-24-oxocholestanoyl-CoA	C00100_c + C01794_c <=> C00010_c + C05467_c	3alpha,7alpha,12alpha-trihydroxy-5beta-cholanoyl-CoA:propanoyl-CoA C-acyltransferase	-1000	1000								R03719#Propanoyl-CoA + Choloyl-CoA <=> CoA + 3alpha,7alpha,12alpha-Trihydroxy-5beta-24-oxocholestanoyl-CoA#C00100_c + C01794_c <=> C00010_c + C05467_c#-1000#1000#
	R03744	ATP + tau-Protein <=> ADP + O-Phospho-tau-protein	C00002_c + C01867_c <=> C00008_c + C03157_c	ATP:tau-protein O-phosphotransferase	-1000	1000								R03744#ATP + tau-Protein <=> ADP + O-Phospho-tau-protein#C00002_c + C01867_c <=> C00008_c + C03157_c#-1000#1000#
	R03777	Octanoyl-CoA + FAD <=> trans-Oct-2-enoyl-CoA + FADH2	C01944_c + C00016_c <=> C05276_c + C01352_c	octanoyl-CoA:electron-transfer flavoprotein 2-oxidoreductase	-1000	1000								R03777#Octanoyl-CoA + FAD <=> trans-Oct-2-enoyl-CoA + FADH2#C01944_c + C00016_c <=> C05276_c + C01352_c#-1000#1000#
	R03778	Octanoyl-CoA + Acetyl-CoA <=> CoA + 3-Oxodecanoyl-CoA	C01944_c + C00024_c <=> C00010_c + C05265_c	Octanoyl-CoA:acetyl-CoA C-acyltransferase	-1000	1000								R03778#Octanoyl-CoA + Acetyl-CoA <=> CoA + 3-Oxodecanoyl-CoA#C01944_c + C00024_c <=> C00010_c + C05265_c#-1000#1000#
	R03804	Monoamide of dicarboxylate + H2O <=> Dicarboxylate + Ammonia	C04131_c + C00001_c <=> C02028_c + C00014_c	Monoamide of a dicarboxylic acid amidohydrolase	-1000	1000								R03804#Monoamide of dicarboxylate + H2O <=> Dicarboxylate + Ammonia#C04131_c + C00001_c <=> C02028_c + C00014_c#-1000#1000#
	R03815	Dihydrolipoylprotein + NAD+ <=> Lipoylprotein + NADH + H+	C02972_c + C00003_c <=> C02051_c + C00004_c + C00080_c	dihydrolipoylprotein:NAD+ oxidoreductase	-1000	1000								R03815#Dihydrolipoylprotein + NAD+ <=> Lipoylprotein + NADH + H+#C02972_c + C00003_c <=> C02051_c + C00004_c + C00080_c#-1000#1000#
	R03857	Lauroyl-CoA + FAD <=> 2-trans-Dodecenoyl-CoA + FADH2	C01832_c + C00016_c <=> C03221_c + C01352_c	lauroyl-CoA:electron-transfer flavoprotein 2,3-oxidoreductase	-1000	1000								R03857#Lauroyl-CoA + FAD <=> 2-trans-Dodecenoyl-CoA + FADH2#C01832_c + C00016_c <=> C03221_c + C01352_c#-1000#1000#
	R03858	Lauroyl-CoA + Acetyl-CoA <=> CoA + 3-Oxotetradecanoyl-CoA	C01832_c + C00024_c <=> C00010_c + C05261_c	Lauroyl-CoA:acetyl-CoA C-acyltransferase	-1000	1000								R03858#Lauroyl-CoA + Acetyl-CoA <=> CoA + 3-Oxotetradecanoyl-CoA#C01832_c + C00024_c <=> C00010_c + C05261_c#-1000#1000#
	R03869	(S)-Methylmalonate semialdehyde + NAD+ + H2O <=> Methylmalonate + NADH + H+	C06002_c + C00003_c + C00001_c <=> C02170_c + C00004_c + C00080_c	(S)-Methylmalonate semialdehyde:NAD+ oxidoreductase	-1000	1000								R03869#(S)-Methylmalonate semialdehyde + NAD+ + H2O <=> Methylmalonate + NADH + H+#C06002_c + C00003_c + C00001_c <=> C02170_c + C00004_c + C00080_c#-1000#1000#
	R03920	ATP + beta-D-Fructose <=> ADP + beta-D-Fructose 6-phosphate	C00002_c + C02336_c <=> C00008_c + C05345_c	ATP:D-fructose 6-phosphotransferase	-1000	1000								R03920#ATP + beta-D-Fructose <=> ADP + beta-D-Fructose 6-phosphate#C00002_c + C02336_c <=> C00008_c + C05345_c#-1000#1000#
	R03940	L-Methionyl-tRNA + 10-Formyltetrahydrofolate <=> Tetrahydrofolate + N-Formylmethionyl-tRNA	C02430_c + C00234_c <=> C00101_c + C03294_c	10-Formyltetrahydrofolate:L-methionyl-tRNA N-formyltransferase	-1000	1000								R03940#L-Methionyl-tRNA + 10-Formyltetrahydrofolate <=> Tetrahydrofolate + N-Formylmethionyl-tRNA#C02430_c + C00234_c <=> C00101_c + C03294_c#-1000#1000#
	R03990	Tetradecanoyl-CoA + FAD <=> trans-Tetradec-2-enoyl-CoA + FADH2	C02593_c + C00016_c <=> C05273_c + C01352_c	tetradecanoyl-CoA:electron-transfer flavoprotein 2,3-oxidoreductase	-1000	1000								R03990#Tetradecanoyl-CoA + FAD <=> trans-Tetradec-2-enoyl-CoA + FADH2#C02593_c + C00016_c <=> C05273_c + C01352_c#-1000#1000#
	R04014	Dodecanoyl-[acyl-carrier protein] + H2O <=> Acyl-carrier protein + Dodecanoic acid	C05223_c + C00001_c <=> C00229_c + C02679_c	dodecanoyl-[acyl-carrier-protein] hydrolase	-1000	1000								R04014#Dodecanoyl-[acyl-carrier protein] + H2O <=> Acyl-carrier protein + Dodecanoic acid#C05223_c + C00001_c <=> C00229_c + C02679_c#-1000#1000#
	R04019	Digalactosylceramide + H2O <=> Galactosylceramide + D-Galactose	C06126_c + C00001_c <=> C02686_c + C00124_c	Digalactosylceramide galactohydrolase	-1000	1000								R04019#Digalactosylceramide + H2O <=> Galactosylceramide + D-Galactose#C06126_c + C00001_c <=> C02686_c + C00124_c#-1000#1000#
	R04025	N-Acetylputrescine + H2O + Oxygen <=> N4-Acetylaminobutanal + Ammonia + Hydrogen peroxide	C02714_c + C00001_c + C00007_c <=> C05936_c + C00014_c + C00027_c	N-Acetylputrescine:oxygen oxidoreductase(deaminating)(flavin-containing)	-1000	1000								R04025#N-Acetylputrescine + H2O + Oxygen <=> N4-Acetylaminobutanal + Ammonia + Hydrogen peroxide#C02714_c + C00001_c + C00007_c <=> C05936_c + C00014_c + C00027_c#-1000#1000#
	R04065	Imidazole-4-acetaldehyde + NAD+ + H2O <=> Imidazole-4-acetate + NADH + H+	C05130_c + C00003_c + C00001_c <=> C02835_c + C00004_c + C00080_c	Imidazole acetaldehyde:NAD+ oxidoreductase	-1000	1000								R04065#Imidazole-4-acetaldehyde + NAD+ + H2O <=> Imidazole-4-acetate + NADH + H+#C05130_c + C00003_c + C00001_c <=> C02835_c + C00004_c + C00080_c#-1000#1000#
	R04125	S-Aminomethyldihydrolipoylprotein + Tetrahydrofolate <=> Dihydrolipoylprotein + 5,10-Methylenetetrahydrofolate + Ammonia	C01242_c + C00101_c <=> C02972_c + C00143_c + C00014_c	S-aminomethyldihydrolipoylprotein:(6S)-tetrahydrofolate aminomethyltransferase (ammonia-forming)	-1000	1000								R04125#S-Aminomethyldihydrolipoylprotein + Tetrahydrofolate <=> Dihydrolipoylprotein + 5,10-Methylenetetrahydrofolate + Ammonia#C01242_c + C00101_c <=> C02972_c + C00143_c + C00014_c#-1000#1000#
	R04137	3-Hydroxyisovaleryl-CoA <=> 3-Methylcrotonyl-CoA + H2O	C05998_c <=> C03069_c + C00001_c	3-hydroxyisovaleryl-CoA hydro-lyase	-1000	1000								R04137#3-Hydroxyisovaleryl-CoA <=> 3-Methylcrotonyl-CoA + H2O#C05998_c <=> C03069_c + C00001_c#-1000#1000#
	R04170	(S)-3-Hydroxydodecanoyl-CoA <=> 2-trans-Dodecenoyl-CoA + H2O	C05262_c <=> C03221_c + C00001_c	(S)-3-Hydroxydodecanoyl-CoA hydro-lyase	-1000	1000								R04170#(S)-3-Hydroxydodecanoyl-CoA <=> 2-trans-Dodecenoyl-CoA + H2O#C05262_c <=> C03221_c + C00001_c#-1000#1000#
	R04173	O-Phospho-L-serine + 2-Oxoglutarate <=> 3-Phosphonooxypyruvate + L-Glutamate	C01005_c + C00026_c <=> C03232_c + C00025_c	3-Phosphoserine:2-oxoglutarate aminotransferase	-1000	1000								R04173#O-Phospho-L-serine + 2-Oxoglutarate <=> 3-Phosphonooxypyruvate + L-Glutamate#C01005_c + C00026_c <=> C03232_c + C00025_c#-1000#1000#
	R04176	NAD+ + ADP-D-ribosyl-acceptor <=> Nicotinamide + ADP-D-ribosyl-acceptor + H+	C00003_c + C03245_c <=> C00153_c + C03245_c + C00080_c	NAD+:poly(adenosine diphosphate D-ribose)ADP-D-ribosyltransferase	-1000	1000								R04176#NAD+ + ADP-D-ribosyl-acceptor <=> Nicotinamide + ADP-D-ribosyl-acceptor + H+#C00003_c + C03245_c <=> C00153_c + C03245_c + C00080_c#-1000#1000#
	R04183	Globoside + N-Acetyl-D-galactosamine <=> N-Acetyl-D-galactosaminyl-N-Acetyl-D-galactosaminyl-1,3-D-galactosyl-1,4-D-galactosyl-1,4-D-glucosylceramide + H2O	C03272_c + C01132_c <=> C04925_c + C00001_c	alpha-N-Acetyl-D-galactosaminide N-acetylgalactosaminohydrolase	-1000	1000								R04183#Globoside + N-Acetyl-D-galactosamine <=> N-Acetyl-D-galactosaminyl-N-Acetyl-D-galactosaminyl-1,3-D-galactosyl-1,4-D-galactosyl-1,4-D-glucosylceramide + H2O#C03272_c + C01132_c <=> C04925_c + C00001_c#-1000#1000#
	R04203	(2S,3S)-3-Hydroxy-2-methylbutanoyl-CoA + NAD+ <=> 2-Methylacetoacetyl-CoA + NADH + H+	C04405_c + C00003_c <=> C03344_c + C00004_c + C00080_c	(2S,3S)-3-hydroxy-2-methylbutanoyl-CoA:NAD+ oxidoreductase	-1000	1000								R04203#(2S,3S)-3-Hydroxy-2-methylbutanoyl-CoA + NAD+ <=> 2-Methylacetoacetyl-CoA + NADH + H+#C04405_c + C00003_c <=> C03344_c + C00004_c + C00080_c#-1000#1000#
	R04204	(2S,3S)-3-Hydroxy-2-methylbutanoyl-CoA <=> 2-Methylbut-2-enoyl-CoA + H2O	C04405_c <=> C03345_c + C00001_c	(2S,3S)-3-Hydroxy-2-methylbutanoyl-CoA hydro-liase	-1000	1000								R04204#(2S,3S)-3-Hydroxy-2-methylbutanoyl-CoA <=> 2-Methylbut-2-enoyl-CoA + H2O#C04405_c <=> C03345_c + C00001_c#-1000#1000#
	R04206	3-Phospho-D-erythronate <=> Phosphoenol-4-deoxy-3-tetrulosonate + H2O	C03356_c <=> C04309_c + C00001_c	3-Phospho-D-erythronate hydro-lyase	-1000	1000								R04206#3-Phospho-D-erythronate <=> Phosphoenol-4-deoxy-3-tetrulosonate + H2O#C03356_c <=> C04309_c + C00001_c#-1000#1000#
	R04224	2-Methylprop-2-enoyl-CoA + H2O <=> (S)-3-Hydroxyisobutyryl-CoA	C03460_c + C00001_c <=> C06000_c	(S)-3-Hydroxyisobutyryl-CoA hydro-lyase	-1000	1000								R04224#2-Methylprop-2-enoyl-CoA + H2O <=> (S)-3-Hydroxyisobutyryl-CoA#C03460_c + C00001_c <=> C06000_c#-1000#1000#
	R04230	ATP + D-4'-Phosphopantothenate + L-Cysteine <=> AMP + Diphosphate + (R)-4'-Phosphopantothenoyl-L-cysteine	C00002_c + C03492_c + C00097_c <=> C00020_c + C00013_c + C04352_c	(R)-4'-Phosphopantothenate:L-cysteine ligase	-1000	1000								R04230#ATP + D-4'-Phosphopantothenate + L-Cysteine <=> AMP + Diphosphate + (R)-4'-Phosphopantothenoyl-L-cysteine#C00002_c + C03492_c + C00097_c <=> C00020_c + C00013_c + C04352_c#-1000#1000#
	R04231	CTP + D-4'-Phosphopantothenate + L-Cysteine <=> CMP + Diphosphate + (R)-4'-Phosphopantothenoyl-L-cysteine	C00063_c + C03492_c + C00097_c <=> C00055_c + C00013_c + C04352_c	(R)-4'-Phosphopantothenate:L-cysteine ligase	-1000	1000								R04231#CTP + D-4'-Phosphopantothenate + L-Cysteine <=> CMP + Diphosphate + (R)-4'-Phosphopantothenoyl-L-cysteine#C00063_c + C03492_c + C00097_c <=> C00055_c + C00013_c + C04352_c#-1000#1000#
	R04241	ATP + THF-polyglutamate(n) + L-Glutamate <=> ADP + Orthophosphate + THF-polyglutamate(n+1)	C00002_c + C03541_c + C00025_c <=> C00008_c + C00009_c + C03541_c	tetrahydropteroyl-gamma-polyglutamate:L-glutamate gamma-ligase (ADP-forming)	-1000	1000								R04241#ATP + THF-polyglutamate(n) + L-Glutamate <=> ADP + Orthophosphate + THF-polyglutamate(n+1)#C00002_c + C03541_c + C00025_c <=> C00008_c + C00009_c + C03541_c#-1000#1000#
	R04242	THF-polyglutamate + n H2O <=> Tetrahydrofolate + n L-Glutamate	C03541_c + C00001_c <=> C00101_c + C00025_c	tetrahydropteroyl-poly-gamma-glutamate gamma-glutamylhydrolase	-1000	1000								R04242#THF-polyglutamate + n H2O <=> Tetrahydrofolate + n L-Glutamate#C03541_c + C00001_c <=> C00101_c + C00025_c#-1000#1000#
	R04273	Peptidylproline (omega=180) <=> Peptidylproline (omega=0)	C03798_c <=> C03633_c	Peptidylproline cis-trans-isomerase	-1000	1000								R04273#Peptidylproline (omega=180) <=> Peptidylproline (omega=0)#C03798_c <=> C03633_c#-1000#1000#
	R04294	2'-Deoxyribonucleoside diphosphate + Thioredoxin disulfide + H2O <=> Ribonucleoside diphosphate + Thioredoxin	C04232_c + C00343_c + C00001_c <=> C03723_c + C00342_c	2'-Deoxyribonucleoside diphosphate:oxidized-thioredoxin 2'-oxidoreductase	-1000	1000								R04294#2'-Deoxyribonucleoside diphosphate + Thioredoxin disulfide + H2O <=> Ribonucleoside diphosphate + Thioredoxin#C04232_c + C00343_c + C00001_c <=> C03723_c + C00342_c#-1000#1000#
	R04300	Dopamine + H2O + Oxygen <=> 3,4-Dihydroxyphenylacetaldehyde + Ammonia + Hydrogen peroxide	C03758_c + C00001_c + C00007_c <=> C04043_c + C00014_c + C00027_c	4-(2-Aminoethyl)-1,2-benzenediol:oxygen oxidoreductase(deaminating)(flavin-containing)	-1000	1000								R04300#Dopamine + H2O + Oxygen <=> 3,4-Dihydroxyphenylacetaldehyde + Ammonia + Hydrogen peroxide#C03758_c + C00001_c + C00007_c <=> C04043_c + C00014_c + C00027_c#-1000#1000#
	R04311	Acylglycerone phosphate + Long-chain alcohol <=> O-Alkylglycerone phosphate + Long-chain acid anion	C03372_c + C00339_c <=> C03715_c + C03129_c	1-Acyl-glycerone-3-phosphate:long-chain-alcohol O-3-phospho-2-oxopropanyltransferase	-1000	1000								R04311#Acylglycerone phosphate + Long-chain alcohol <=> O-Alkylglycerone phosphate + Long-chain acid anion#C03372_c + C00339_c <=> C03715_c + C03129_c#-1000#1000#
	R04319	trans-2,3-Dehydroacyl-CoA + NADP+ <=> trans,trans-2,3,4,5-Tetradehydroacyl-CoA + NADPH + H+	C00658_c + C00006_c <=> C04512_c + C00005_c + C00080_c	trans-2,3-didehydroacyl-CoA:NADP+ 4-oxidoreductase	-1000	1000								R04319#trans-2,3-Dehydroacyl-CoA + NADP+ <=> trans,trans-2,3,4,5-Tetradehydroacyl-CoA + NADPH + H+#C00658_c + C00006_c <=> C04512_c + C00005_c + C00080_c#-1000#1000#
	R04328	Lathosterol + CO2 + 4 H2O + 3 NADP+ <=> Methostenol + 3 Oxygen + 3 NADPH + 3 H+	C01189_c + C00011_c + 4 C00001_c + 3 C00006_c <=> C05111_c + 3 C00007_c + 3 C00005_c + 3 C00080_c		-1000	1000								R04328#Lathosterol + CO2 + 4 H2O + 3 NADP+ <=> Methostenol + 3 Oxygen + 3 NADPH + 3 H+#C01189_c + C00011_c + 4 C00001_c + 3 C00006_c <=> C05111_c + 3 C00007_c + 3 C00005_c + 3 C00080_c#-1000#1000#
	R04391	ATP + N-((R)-Pantothenoyl)-L-cysteine <=> ADP + (R)-4'-Phosphopantothenoyl-L-cysteine	C00002_c + C04079_c <=> C00008_c + C04352_c	ATP:pantothenate 4'-phosphotransferase	-1000	1000								R04391#ATP + N-((R)-Pantothenoyl)-L-cysteine <=> ADP + (R)-4'-Phosphopantothenoyl-L-cysteine#C00002_c + C04079_c <=> C00008_c + C04352_c#-1000#1000#
	R04444	L-1-Pyrroline-3-hydroxy-5-carboxylate + NAD+ + 2 H2O <=> L-erythro-4-Hydroxyglutamate + NADH + H+	C04281_c + C00003_c + 2 C00001_c <=> C05947_c + C00004_c + C00080_c	L-1-pyrroline-3-hydroxy-5-carboxylate:NAD+ oxidoreductase	-1000	1000								R04444#L-1-Pyrroline-3-hydroxy-5-carboxylate + NAD+ + 2 H2O <=> L-erythro-4-Hydroxyglutamate + NADH + H+#C04281_c + C00003_c + 2 C00001_c <=> C05947_c + C00004_c + C00080_c#-1000#1000#
	R04445	L-1-Pyrroline-3-hydroxy-5-carboxylate + NADP+ + 2 H2O <=> L-erythro-4-Hydroxyglutamate + NADPH + H+	C04281_c + C00006_c + 2 C00001_c <=> C05947_c + C00005_c + C00080_c	L-1-pyrroline-3-hydroxy-5-carboxylate:NADP+ oxidoreductase	-1000	1000								R04445#L-1-Pyrroline-3-hydroxy-5-carboxylate + NADP+ + 2 H2O <=> L-erythro-4-Hydroxyglutamate + NADPH + H+#C04281_c + C00006_c + 2 C00001_c <=> C05947_c + C00005_c + C00080_c#-1000#1000#
	R04452	2-Acetyl-1-alkyl-sn-glycero-3-phosphocholine + H2O <=> 1-Organyl-2-lyso-sn-glycero-3-phosphocholine + Acetate	C04598_c + C00001_c <=> C04317_c + C00033_c	1-Alkyl-2-acetyl-sn-glycero-3-phosphocholine acetohydrolase	-1000	1000								R04452#2-Acetyl-1-alkyl-sn-glycero-3-phosphocholine + H2O <=> 1-Organyl-2-lyso-sn-glycero-3-phosphocholine + Acetate#C04598_c + C00001_c <=> C04317_c + C00033_c#-1000#1000#
	R04496	S-Adenosyl-L-methionine + Protein C-terminal S-farnesyl-L-cysteine <=> S-Adenosyl-L-homocysteine + Protein C-terminal S-farnesyl-L-cysteine methyl ester	C00019_c + C04506_c <=> C00021_c + C04748_c	S-Adenosyl-L-methionine:protein-C-terminal-S-farnesyl-L-cysteine O-methyltransferase	-1000	1000								R04496#S-Adenosyl-L-methionine + Protein C-terminal S-farnesyl-L-cysteine <=> S-Adenosyl-L-homocysteine + Protein C-terminal S-farnesyl-L-cysteine methyl ester#C00019_c + C04506_c <=> C00021_c + C04748_c#-1000#1000#
	R04501	4,4-Dimethyl-5alpha-cholest-7-en-3beta-ol + NADH + H+ + Oxygen <=> 4beta-Hydroxymethyl-4alpha-methyl-5alpha-cholest-7-en-3beta-ol + NAD+ + H2O	C04530_c + C00004_c + C00080_c + C00007_c <=> C04814_c + C00003_c + C00001_c	4,4-dimethyl-5alpha-cholest-7-en-3beta-ol,NADH:oxygen oxidoreductase (hydroxylating)	-1000	1000								R04501#4,4-Dimethyl-5alpha-cholest-7-en-3beta-ol + NADH + H+ + Oxygen <=> 4beta-Hydroxymethyl-4alpha-methyl-5alpha-cholest-7-en-3beta-ol + NAD+ + H2O#C04530_c + C00004_c + C00080_c + C00007_c <=> C04814_c + C00003_c + C00001_c#-1000#1000#
	R04502	GDP-mannose + N,N'-Diacetylchitobiosyldiphosphodolichol <=> GDP + beta-D-Mannosyldiacetylchitobiosyldiphosphodolichol	C00096_c + C04537_c <=> C00035_c + C05860_c	GDPmannose:chitobiosyldiphosphodolichol beta-D-mannosyltransferase	-1000	1000								R04502#GDP-mannose + N,N'-Diacetylchitobiosyldiphosphodolichol <=> GDP + beta-D-Mannosyldiacetylchitobiosyldiphosphodolichol#C00096_c + C04537_c <=> C00035_c + C05860_c#-1000#1000#
	R04506	3alpha,7alpha-Dihydroxy-5beta-cholestan-26-al + NAD+ + H2O <=> 3alpha,7alpha-Dihydroxy-5beta-cholestanate + NADH + H+	C05445_c + C00003_c + C00001_c <=> C04554_c + C00004_c + C00080_c	3alpha,7alpha-Dihydroxy-5beta-cholestan-26-al:NAD+ oxidoreductase	-1000	1000								R04506#3alpha,7alpha-Dihydroxy-5beta-cholestan-26-al + NAD+ + H2O <=> 3alpha,7alpha-Dihydroxy-5beta-cholestanate + NADH + H+#C05445_c + C00003_c + C00001_c <=> C04554_c + C00004_c + C00080_c#-1000#1000#
	R04513	Phosphatidylinositol-3,4,5-trisphosphate + H2O <=> 1-Phosphatidyl-D-myo-inositol 4,5-bisphosphate + Orthophosphate	C05981_c + C00001_c <=> C04637_c + C00009_c	Phosphatidylinositol-3,4,5-trisphosphate 3-phosphohydrolase	-1000	1000								R04513#Phosphatidylinositol-3,4,5-trisphosphate + H2O <=> 1-Phosphatidyl-D-myo-inositol 4,5-bisphosphate + Orthophosphate#C05981_c + C00001_c <=> C04637_c + C00009_c#-1000#1000#
	R04534	(3R)-3-Hydroxydecanoyl-[acyl-carrier protein] + NADP+ <=> 3-Oxodecanoyl-[acp] + NADPH	C04619_c + C00006_c <=> C05753_c + C00005_c	(3R)-3-Hydroxydecanoyl-[acyl-carrier-protein]:NADP+ oxidoreductase	-1000	1000								R04534#(3R)-3-Hydroxydecanoyl-[acyl-carrier protein] + NADP+ <=> 3-Oxodecanoyl-[acp] + NADPH#C04619_c + C00006_c <=> C05753_c + C00005_c#-1000#1000#
	R04535	(3R)-3-Hydroxydecanoyl-[acyl-carrier protein] <=> trans-Dec-2-enoyl-[acp] + H2O	C04619_c <=> C05754_c + C00001_c	(3R)-3-Hydroxybutanoyl-[acyl-carrier-protein] hydro-lyase	-1000	1000								R04535#(3R)-3-Hydroxydecanoyl-[acyl-carrier protein] <=> trans-Dec-2-enoyl-[acp] + H2O#C04619_c <=> C05754_c + C00001_c#-1000#1000#
	R04536	(3R)-3-Hydroxyoctanoyl-[acyl-carrier protein] + NADP+ <=> 3-Oxooctanoyl-[acp] + NADPH + H+	C04620_c + C00006_c <=> C05750_c + C00005_c + C00080_c	(3R)-3-Hydroxyoctanoyl-[acyl-carrier-protein]:NADP+ oxidoreductase	-1000	1000								R04536#(3R)-3-Hydroxyoctanoyl-[acyl-carrier protein] + NADP+ <=> 3-Oxooctanoyl-[acp] + NADPH + H+#C04620_c + C00006_c <=> C05750_c + C00005_c + C00080_c#-1000#1000#
	R04537	(3R)-3-Hydroxyoctanoyl-[acyl-carrier protein] <=> trans-Oct-2-enoyl-[acp] + H2O	C04620_c <=> C05751_c + C00001_c	(3R)-3-Hydroxybutanoyl-[acyl-carrier-protein] hydro-lyase	-1000	1000								R04537#(3R)-3-Hydroxyoctanoyl-[acyl-carrier protein] <=> trans-Oct-2-enoyl-[acp] + H2O#C04620_c <=> C05751_c + C00001_c#-1000#1000#
	R04543	(3R)-3-Hydroxypalmitoyl-[acyl-carrier protein] + NADP+ <=> 3-Oxohexadecanoyl-[acp] + NADPH + H+	C04633_c + C00006_c <=> C05762_c + C00005_c + C00080_c	(3R)-3-Hydroxypalmitoyl-[acyl-carrier-protein]:NADP+ oxidoreductase	-1000	1000								R04543#(3R)-3-Hydroxypalmitoyl-[acyl-carrier protein] + NADP+ <=> 3-Oxohexadecanoyl-[acp] + NADPH + H+#C04633_c + C00006_c <=> C05762_c + C00005_c + C00080_c#-1000#1000#
	R04544	(3R)-3-Hydroxypalmitoyl-[acyl-carrier protein] <=> trans-Hexadec-2-enoyl-[acp] + H2O	C04633_c <=> C05763_c + C00001_c	(3R)-3-hydroxypalmitoyl-[acyl-carrier-protein] hydro-lyase	-1000	1000								R04544#(3R)-3-Hydroxypalmitoyl-[acyl-carrier protein] <=> trans-Hexadec-2-enoyl-[acp] + H2O#C04633_c <=> C05763_c + C00001_c#-1000#1000#
	R04566	(3R)-3-Hydroxytetradecanoyl-[acyl-carrier protein] + NADP+ <=> 3-Oxotetradecanoyl-[acp] + NADPH + H+	C04688_c + C00006_c <=> C05759_c + C00005_c + C00080_c	(3R)-3-Hydroxytetradecanoyl-[acyl-carrier-protein]:NADP+ oxidoreductase	-1000	1000								R04566#(3R)-3-Hydroxytetradecanoyl-[acyl-carrier protein] + NADP+ <=> 3-Oxotetradecanoyl-[acp] + NADPH + H+#C04688_c + C00006_c <=> C05759_c + C00005_c + C00080_c#-1000#1000#
	R04568	(3R)-3-Hydroxytetradecanoyl-[acyl-carrier protein] <=> trans-Tetradec-2-enoyl-[acp] + H2O	C04688_c <=> C05760_c + C00001_c	(3R)-3-Hydroxypalmitoyl-[acyl-carrier-protein] hydro-lyase	-1000	1000								R04568#(3R)-3-Hydroxytetradecanoyl-[acyl-carrier protein] <=> trans-Tetradec-2-enoyl-[acp] + H2O#C04688_c <=> C05760_c + C00001_c#-1000#1000#
	R04620	7,8-Dihydroneopterin 3'-triphosphate + 3 H2O <=> 2-Amino-4-hydroxy-6-(D-erythro-1,2,3-trihydroxypropyl)-7,8-dihydropteridine + 3 Orthophosphate	C04895_c + 3 C00001_c <=> C04874_c + 3 C00009_c	2-Amino-4-hydroxy-6-(erythro-1,2,3-trihydroxypropyl) dihydropteridine triphosphate phosphohydrolase (alkaline optimum)	-1000	1000								R04620#7,8-Dihydroneopterin 3'-triphosphate + 3 H2O <=> 2-Amino-4-hydroxy-6-(D-erythro-1,2,3-trihydroxypropyl)-7,8-dihydropteridine + 3 Orthophosphate#C04895_c + 3 C00001_c <=> C04874_c + 3 C00009_c#-1000#1000#
	R04633	D-Galactosyl-N-acetyl-D-galactosaminyl-(N-acetylneuraminyl)-D-galactosyl-D-glucosylceramide + H2O <=> N-Acetyl-D-galactosaminyl-(N-acetylneuraminyl)-D-galactosyl-D-glucosylceramide + D-Galactose	C04911_c + C00001_c <=> C04884_c + C00124_c	D-Galactosyl-N-acetyl-D-galactosaminyl-(N-acetylneuraminyl)-D- galactosyl-D-glucosylceramide galactohydrolase	-1000	1000								R04633#D-Galactosyl-N-acetyl-D-galactosaminyl-(N-acetylneuraminyl)-D-galactosyl-D-glucosylceramide + H2O <=> N-Acetyl-D-galactosaminyl-(N-acetylneuraminyl)-D-galactosyl-D-glucosylceramide + D-Galactose#C04911_c + C00001_c <=> C04884_c + C00124_c#-1000#1000#
	R04671	4alpha-Methylcholesta-8-en-3beta-ol <=> Methostenol	C05110_c <=> C05111_c	4alpha-Methylcholesta-8-en-3beta-ol delta7-delta8-isomerase	-1000	1000								R04671#4alpha-Methylcholesta-8-en-3beta-ol <=> Methostenol#C05110_c <=> C05111_c#-1000#1000#
	R04674	N-Methylhistamine + H2O + Oxygen <=> Methylimidazole acetaldehyde + Ammonia + Hydrogen peroxide	C05127_c + C00001_c + C00007_c <=> C05827_c + C00014_c + C00027_c	N-methylhistamine:oxygen oxidoreductase (deaminating)	-1000	1000								R04674#N-Methylhistamine + H2O + Oxygen <=> Methylimidazole acetaldehyde + Ammonia + Hydrogen peroxide#C05127_c + C00001_c + C00007_c <=> C05827_c + C00014_c + C00027_c#-1000#1000#
	R04681	Estriol + NAD+ <=> 16alpha-Hydroxyestrone + NADH + H+	C05141_c + C00003_c <=> C05300_c + C00004_c + C00080_c	Estriol:NAD+ 17-oxidoreductase	-1000	1000								R04681#Estriol + NAD+ <=> 16alpha-Hydroxyestrone + NADH + H+#C05141_c + C00003_c <=> C05300_c + C00004_c + C00080_c#-1000#1000#
	R04682	Estriol + NADP+ <=> 16alpha-Hydroxyestrone + NADPH + H+	C05141_c + C00006_c <=> C05300_c + C00005_c + C00080_c	Estriol:NADP+ 17-oxidoreductase	-1000	1000								R04682#Estriol + NADP+ <=> 16alpha-Hydroxyestrone + NADPH + H+#C05141_c + C00006_c <=> C05300_c + C00005_c + C00080_c#-1000#1000#
	R04725	Dodecanoyl-[acyl-carrier protein] + NADP+ <=> trans-Dodec-2-enoyl-[acp] + NADPH + H+	C05223_c + C00006_c <=> C05758_c + C00005_c + C00080_c	dodecanoyl-[acp]:NADP+ trans-2-oxidoreductase	-1000	1000								R04725#Dodecanoyl-[acyl-carrier protein] + NADP+ <=> trans-Dodec-2-enoyl-[acp] + NADPH + H+#C05223_c + C00006_c <=> C05758_c + C00005_c + C00080_c#-1000#1000#
	R04726	Dodecanoyl-[acyl-carrier protein] + Malonyl-[acyl-carrier protein] <=> 3-Oxotetradecanoyl-[acp] + CO2 + Acyl-carrier protein	C05223_c + C01209_c <=> C05759_c + C00011_c + C00229_c	dodecanoyl-[acyl-carrier-protein]:malonyl-[acyl-carrier-protein] C-acyltransferase (decarboxylating)	-1000	1000								R04726#Dodecanoyl-[acyl-carrier protein] + Malonyl-[acyl-carrier protein] <=> 3-Oxotetradecanoyl-[acp] + CO2 + Acyl-carrier protein#C05223_c + C01209_c <=> C05759_c + C00011_c + C00229_c#-1000#1000#
	R04729	(2S)-2-Methylacyl-CoA <=> (2R)-2-Methylacyl-CoA	C05232_c <=> C05329_c	(2S)-2-Methylacyl-CoA 2-epimerase	-1000	1000								R04729#(2S)-2-Methylacyl-CoA <=> (2R)-2-Methylacyl-CoA#C05232_c <=> C05329_c#-1000#1000#
	R04739	(S)-3-Hydroxytetradecanoyl-CoA + NAD+ <=> 3-Oxotetradecanoyl-CoA + NADH	C05260_c + C00003_c <=> C05261_c + C00004_c	(S)-3-Hydroxytetradecanoyl-CoA:NAD+ oxidoreductase	-1000	1000								R04739#(S)-3-Hydroxytetradecanoyl-CoA + NAD+ <=> 3-Oxotetradecanoyl-CoA + NADH#C05260_c + C00003_c <=> C05261_c + C00004_c#-1000#1000#
	R04740	(S)-3-Hydroxytetradecanoyl-CoA <=> trans-Tetradec-2-enoyl-CoA + H2O	C05260_c <=> C05273_c + C00001_c	(S)-3-Hydroxytetradecanoyl-CoA hydro-lyase	-1000	1000								R04740#(S)-3-Hydroxytetradecanoyl-CoA <=> trans-Tetradec-2-enoyl-CoA + H2O#C05260_c <=> C05273_c + C00001_c#-1000#1000#
	R04741	(S)-3-Hydroxydodecanoyl-CoA + NAD+ <=> 3-Oxododecanoyl-CoA + NADH + H+	C05262_c + C00003_c <=> C05263_c + C00004_c + C00080_c	(S)-3-hydroxydodecanoyl-CoA:NAD+ oxidoreductase	-1000	1000								R04741#(S)-3-Hydroxydodecanoyl-CoA + NAD+ <=> 3-Oxododecanoyl-CoA + NADH + H+#C05262_c + C00003_c <=> C05263_c + C00004_c + C00080_c#-1000#1000#
	R04742	Decanoyl-CoA + Acetyl-CoA <=> CoA + 3-Oxododecanoyl-CoA	C05274_c + C00024_c <=> C00010_c + C05263_c	Decanoyl-CoA:acetyl-CoA C-acyltransferase	-1000	1000								R04742#Decanoyl-CoA + Acetyl-CoA <=> CoA + 3-Oxododecanoyl-CoA#C05274_c + C00024_c <=> C00010_c + C05263_c#-1000#1000#
	R04743	(S)-Hydroxydecanoyl-CoA + NAD+ <=> 3-Oxodecanoyl-CoA + NADH + H+	C05264_c + C00003_c <=> C05265_c + C00004_c + C00080_c	(S)-hydroxydecanoyl-CoA:NAD+ oxidoreductase	-1000	1000								R04743#(S)-Hydroxydecanoyl-CoA + NAD+ <=> 3-Oxodecanoyl-CoA + NADH + H+#C05264_c + C00003_c <=> C05265_c + C00004_c + C00080_c#-1000#1000#
	R04744	(S)-Hydroxydecanoyl-CoA <=> trans-Dec-2-enoyl-CoA + H2O	C05264_c <=> C05275_c + C00001_c	(S)-Hydroxydecanoyl-CoA hydro-lyase	-1000	1000								R04744#(S)-Hydroxydecanoyl-CoA <=> trans-Dec-2-enoyl-CoA + H2O#C05264_c <=> C05275_c + C00001_c#-1000#1000#
	R04745	(S)-3-Hydroxyoctanoyl-CoA + NAD+ <=> 3-Oxooctanoyl-CoA + NADH + H+	C05266_c + C00003_c <=> C05267_c + C00004_c + C00080_c	(S)-hydroxyoctanoyl-CoA:NAD+ oxidoreductase	-1000	1000								R04745#(S)-3-Hydroxyoctanoyl-CoA + NAD+ <=> 3-Oxooctanoyl-CoA + NADH + H+#C05266_c + C00003_c <=> C05267_c + C00004_c + C00080_c#-1000#1000#
	R04746	(S)-3-Hydroxyoctanoyl-CoA <=> trans-Oct-2-enoyl-CoA + H2O	C05266_c <=> C05276_c + C00001_c	(S)-Hydroxyoctanoyl-CoA hydro-lyase	-1000	1000								R04746#(S)-3-Hydroxyoctanoyl-CoA <=> trans-Oct-2-enoyl-CoA + H2O#C05266_c <=> C05276_c + C00001_c#-1000#1000#
	R04747	Hexanoyl-CoA + Acetyl-CoA <=> CoA + 3-Oxooctanoyl-CoA	C05270_c + C00024_c <=> C00010_c + C05267_c	Hexanoyl-CoA:acetyl-CoA C-acyltransferase	-1000	1000								R04747#Hexanoyl-CoA + Acetyl-CoA <=> CoA + 3-Oxooctanoyl-CoA#C05270_c + C00024_c <=> C00010_c + C05267_c#-1000#1000#
	R04748	(S)-Hydroxyhexanoyl-CoA + NAD+ <=> 3-Oxohexanoyl-CoA + NADH + H+	C05268_c + C00003_c <=> C05269_c + C00004_c + C00080_c	(S)-hydroxyhexanoyl-CoA:NAD+ oxidoreductase	-1000	1000								R04748#(S)-Hydroxyhexanoyl-CoA + NAD+ <=> 3-Oxohexanoyl-CoA + NADH + H+#C05268_c + C00003_c <=> C05269_c + C00004_c + C00080_c#-1000#1000#
	R04749	(S)-Hydroxyhexanoyl-CoA <=> trans-Hex-2-enoyl-CoA + H2O	C05268_c <=> C05271_c + C00001_c	(S)-Hydroxyhexanoyl-CoA hydro-lyase	-1000	1000								R04749#(S)-Hydroxyhexanoyl-CoA <=> trans-Hex-2-enoyl-CoA + H2O#C05268_c <=> C05271_c + C00001_c#-1000#1000#
	R04751	Hexanoyl-CoA + FAD <=> trans-Hex-2-enoyl-CoA + FADH2	C05270_c + C00016_c <=> C05271_c + C01352_c	hexanoyl-CoA:electron-transfer flavoprotein 2,3-oxidoreductase	-1000	1000								R04751#Hexanoyl-CoA + FAD <=> trans-Hex-2-enoyl-CoA + FADH2#C05270_c + C00016_c <=> C05271_c + C01352_c#-1000#1000#
	R04754	Decanoyl-CoA + FAD <=> trans-Dec-2-enoyl-CoA + FADH2	C05274_c + C00016_c <=> C05275_c + C01352_c	decanoyl-CoA:electron-transfer flavoprotein 2,3-oxidoreductase	-1000	1000								R04754#Decanoyl-CoA + FAD <=> trans-Dec-2-enoyl-CoA + FADH2#C05274_c + C00016_c <=> C05275_c + C01352_c#-1000#1000#
	R04770	L-Selenomethionine + H2O <=> Methaneselenol + Ammonia + 2-Oxobutanoate	C05335_c + C00001_c <=> C05703_c + C00014_c + C00109_c	Selenomethionine methanethiol-lyase (deaminating)	-1000	1000								R04770#L-Selenomethionine + H2O <=> Methaneselenol + Ammonia + 2-Oxobutanoate#C05335_c + C00001_c <=> C05703_c + C00014_c + C00109_c#-1000#1000#
	R04779	ATP + beta-D-Fructose 6-phosphate <=> ADP + beta-D-Fructose 1,6-bisphosphate	C00002_c + C05345_c <=> C00008_c + C05378_c	ATP:D-fructose-6-phosphate 1-phosphotransferase	-1000	1000								R04779#ATP + beta-D-Fructose 6-phosphate <=> ADP + beta-D-Fructose 1,6-bisphosphate#C00002_c + C05345_c <=> C00008_c + C05378_c#-1000#1000#
	R04783	3-Ketolactose + H2O <=> 3-Keto-beta-D-galactose + beta-D-Glucose	C05403_c + C00001_c <=> C05394_c + C00221_c	3-Ketolactose galactohydrolase	-1000	1000								R04783#3-Ketolactose + H2O <=> 3-Keto-beta-D-galactose + beta-D-Glucose#C05403_c + C00001_c <=> C05394_c + C00221_c#-1000#1000#
	R04804	Zymosterol <=> 5alpha-Cholesta-7,24-dien-3beta-ol	C05437_c <=> C05439_c	delta8,24-Cholestadien-3beta-ol delta7-delta8-isomerase	-1000	1000								R04804#Zymosterol <=> 5alpha-Cholesta-7,24-dien-3beta-ol#C05437_c <=> C05439_c#-1000#1000#
	R04809	3alpha,7alpha-Dihydroxy-5beta-cholest-24-enoyl-CoA + H2O <=> 3alpha,7alpha,24-Trihydroxy-5beta-cholestanoyl-CoA	C05447_c + C00001_c <=> C05448_c	3alpha,7alpha,24-trihydroxy-5beta-cholestanoyl-CoA hydro-lyase [3alpha,7alpha-dihydroxy-5beta-cholest-24-enoyl-CoA-forming]	-1000	1000								R04809#3alpha,7alpha-Dihydroxy-5beta-cholest-24-enoyl-CoA + H2O <=> 3alpha,7alpha,24-Trihydroxy-5beta-cholestanoyl-CoA#C05447_c + C00001_c <=> C05448_c#-1000#1000#
	R04810	3alpha,7alpha,24-Trihydroxy-5beta-cholestanoyl-CoA + NAD+ <=> 3alpha,7alpha-Dihydroxy-5beta-24-oxocholestanoyl-CoA + NADH + H+	C05448_c + C00003_c <=> C05449_c + C00004_c + C00080_c	3alpha,7alpha,24-trihydroxy-5beta-cholestanoyl-CoA:NAD+ oxidoreductase	-1000	1000								R04810#3alpha,7alpha,24-Trihydroxy-5beta-cholestanoyl-CoA + NAD+ <=> 3alpha,7alpha-Dihydroxy-5beta-24-oxocholestanoyl-CoA + NADH + H+#C05448_c + C00003_c <=> C05449_c + C00004_c + C00080_c#-1000#1000#
	R04811	Propanoyl-CoA + Chenodeoxycholoyl-CoA <=> CoA + 3alpha,7alpha-Dihydroxy-5beta-24-oxocholestanoyl-CoA	C00100_c + C05337_c <=> C00010_c + C05449_c	Propanoyl-CoA:acetyl-CoA C-acyltransferase	-1000	1000								R04811#Propanoyl-CoA + Chenodeoxycholoyl-CoA <=> CoA + 3alpha,7alpha-Dihydroxy-5beta-24-oxocholestanoyl-CoA#C00100_c + C05337_c <=> C00010_c + C05449_c#-1000#1000#
	R04812	3alpha,7alpha,12alpha,24-Tetrahydroxy-5beta-cholestanoyl-CoA + NAD+ <=> 3alpha,7alpha,12alpha-Trihydroxy-5beta-24-oxocholestanoyl-CoA + NADH + H+	C05450_c + C00003_c <=> C05467_c + C00004_c + C00080_c	3alpha,7alpha,12alpha,24-tetrahydroxy-5beta-cholestanoyl-CoA:NAD+ oxidoreductase	-1000	1000								R04812#3alpha,7alpha,12alpha,24-Tetrahydroxy-5beta-cholestanoyl-CoA + NAD+ <=> 3alpha,7alpha,12alpha-Trihydroxy-5beta-24-oxocholestanoyl-CoA + NADH + H+#C05450_c + C00003_c <=> C05467_c + C00004_c + C00080_c#-1000#1000#
	R04813	3alpha,7alpha,12alpha,24-Tetrahydroxy-5beta-cholestanoyl-CoA <=> 3alpha,7alpha,12alpha-Trihydroxy-5beta-cholest-24-enoyl-CoA + H2O	C05450_c <=> C05460_c + C00001_c	(24R,25R)-3alpha,7alpha,12alpha,24-tetrahydroxy-5beta-cholestanoyl-CoA hydro-lyase	-1000	1000								R04813#3alpha,7alpha,12alpha,24-Tetrahydroxy-5beta-cholestanoyl-CoA <=> 3alpha,7alpha,12alpha-Trihydroxy-5beta-cholest-24-enoyl-CoA + H2O#C05450_c <=> C05460_c + C00001_c#-1000#1000#
	R04859	O-Acetyl-L-serine + Thiosulfate + Thioredoxin + H+ <=> L-Cysteine + Sulfite + Thioredoxin disulfide + Acetate	C00979_c + C00320_c + C00342_c + C00080_c <=> C00097_c + C00094_c + C00343_c + C00033_c	O3-acetyl-L-serine:thiosulfate 2-amino-2-carboxyethyltransferase (reducing, L-cysteine-forming)	-1000	1000								R04859#O-Acetyl-L-serine + Thiosulfate + Thioredoxin + H+ <=> L-Cysteine + Sulfite + Thioredoxin disulfide + Acetate#C00979_c + C00320_c + C00342_c + C00080_c <=> C00097_c + C00094_c + C00343_c + C00033_c#-1000#1000#
	R04890	3-Methoxytyramine + H2O + Oxygen <=> 3-Methoxy-4-hydroxyphenylacetaldehyde + Hydrogen peroxide + Ammonia	C05587_c + C00001_c + C00007_c <=> C05581_c + C00027_c + C00014_c	3-Methoxytyramine:oxygen oxidoreductase (deaminating) (copper-containing)	-1000	1000								R04890#3-Methoxytyramine + H2O + Oxygen <=> 3-Methoxy-4-hydroxyphenylacetaldehyde + Hydrogen peroxide + Ammonia#C05587_c + C00001_c + C00007_c <=> C05581_c + C00027_c + C00014_c#-1000#1000#
	R04893	L-Normetanephrine + H2O + Oxygen <=> 3-Methoxy-4-hydroxyphenylglycolaldehyde + Ammonia + Hydrogen peroxide	C05589_c + C00001_c + C00007_c <=> C05583_c + C00014_c + C00027_c	L-Normetanephrine:oxygen oxidoreductase (deaminating) (copper-containing)	-1000	1000								R04893#L-Normetanephrine + H2O + Oxygen <=> 3-Methoxy-4-hydroxyphenylglycolaldehyde + Ammonia + Hydrogen peroxide#C05589_c + C00001_c + C00007_c <=> C05583_c + C00014_c + C00027_c#-1000#1000#
	R04894	L-Metanephrine + H2O + Oxygen <=> 3-Methoxy-4-hydroxyphenylglycolaldehyde + Hydrogen peroxide + Methylamine	C05588_c + C00001_c + C00007_c <=> C05583_c + C00027_c + C00218_c	L-Metanephrine:oxygen oxidoreductase (deaminating) (flavin-containing)	-1000	1000								R04894#L-Metanephrine + H2O + Oxygen <=> 3-Methoxy-4-hydroxyphenylglycolaldehyde + Hydrogen peroxide + Methylamine#C05588_c + C00001_c + C00007_c <=> C05583_c + C00027_c + C00218_c#-1000#1000#
	R04903	5-Hydroxyindoleacetaldehyde + NAD+ + H2O <=> 5-Hydroxyindoleacetate + H+ + NADH	C05634_c + C00003_c + C00001_c <=> C05635_c + C00080_c + C00004_c	5-Hydroxyindoleacetaldehyde:NAD+ oxidoreductase	-1000	1000								R04903#5-Hydroxyindoleacetaldehyde + NAD+ + H2O <=> 5-Hydroxyindoleacetate + H+ + NADH#C05634_c + C00003_c + C00001_c <=> C05635_c + C00080_c + C00004_c#-1000#1000#
	R04907	3-Hydroxykynurenamine + Oxygen <=> 4,8-Dihydroxyquinoline + Ammonia + Hydrogen peroxide	C05636_c + C00007_c <=> C05637_c + C00014_c + C00027_c	3-Hydroxykynurenamine:oxygen oxidoreductase(deaminating)(flavin-containing)	-1000	1000								R04907#3-Hydroxykynurenamine + Oxygen <=> 4,8-Dihydroxyquinoline + Ammonia + Hydrogen peroxide#C05636_c + C00007_c <=> C05637_c + C00014_c + C00027_c#-1000#1000#
[truncated: 340 more rows]

## Sheet: Simulation
	Rxn ID	Description	Growth with Glucose	Growth without Glucose
	Biomass	Biomass synthesis	1.03766	0.70508
	R00009	2 Hydrogen peroxide <=> Oxygen + 2 H2O	10	10
	R00022	Chitobiose + H2O <=> 2 N-Acetyl-D-glucosamine	0	0
[truncated: 687 more rows]

## Sheet: Foglio5
Pyruvate	-0.328357
[truncated: 9 more rows]

## Sheet: Metabolite list
#	Metabolite Id	Metabolite Name			For SBML
[truncated: 828 more rows]
